# Supplementary material for: HITS-CLIP Analysis Uncovers a Link between the Kaposi’s Sarcoma-Associated Herpesvirus ORF57 Protein and Host Pre-mRNA Metabolism
Source: PLoS Pathog. 2015 Feb 24;11(2):e1004652. doi: 10.1371/journal.ppat.1004652 (PMC4339584; doi:10.1371/journal.ppat.1004652)
Supplement: S1 Table — The coordinates for all enriched clusters in the human and viral genomes are listed for both the high and low stringency datasets. The first sheet provides a description of the data found in each of the columns. The additional spreadsheet contains the data. (XLSX) [file ppat.1004652.s008.xlsx]

## Sheet: Description
This file contains the enriched clusters (ECs) identified by our bioinformatic analysis of the HITS-CLIP data; the first sheet is the high stringency (p<0.001) and the second sheet is low stringency (p<0.05)
Columns Title	Column	Description
ID	A	This is a unique identifier used in bioinformatic analysis.
fold	B	The normalized value of HITS-CLIP clusters relative to inputs at the same genomic location. This value does not take mutation status]into account.
pval	C	The p-value associated with the enriched clusters. See text for description.
chr	D	Indicates human chromosome number or viral genome
Strand	E	Plus or minus orientation of tag
start/end	F-G	Coordinates of the enriched clusters
EC length	H	Length of the enriched cluster
Total_	I-N	Sum of tags on all bases within the enriched cluster in the Pellets or Inputs (P or I) for one of three biological replicates (1, 2, or 3)
Mutant_	O-T	Sum of mutant tags on all bases within the enriched cluster in the Pellets or Inputs (P or I) for one of three biological replicates (1, 2, or 3)
Gene	U	Gene name for human genes, virus genes not listed asan appropriate annotation file was unavailable.
Chromosome position	V	Combined chromosome number and location to facilitate genome browsing

## Sheet: ECs(p<0.001)
id	fold	pval	chr	strand	start	end	EC length	Total_P1	Total_P2	Total_P3	Total_I1	Total_I2	Total_I3	Mutant_P1	Mutant_P2	Mutant_P3	Mutant_I1	Mutant_I2	Mutant_I3	gene	chromosome:position
36294	1.955	0.000716984	chr1	-	881209	881248	39	70	97	104	0	40	40	0	0	0	0	0	0	NOC2L	chr1:881209-881248
36295	2.46473	0.000175638	chr1	-	887639	887778	139	356	190	218	0	62	0	1	0	0	0	0	0	NOC2L	chr1:887639-887778
36295	3.6412	2.12372e-06	chr1	-	888299	888378	79	428	256	160	28	33	0	1	2	0	0	0	0	NOC2L	chr1:888299-888378
36295	1.95621	0.00020391	chr1	-	888719	888818	99	354	515	468	261	99	181	1	2	1	1	0	0	NOC2L	chr1:888719-888818
36295	3.79583	9.38851e-06	chr1	-	888999	889158	159	401	660	277	0	0	0	0	1	0	0	0	0	NOC2L	chr1:888999-889158
36300	2.18224	0.000192876	chr1	-	1007772	1007871	99	547	275	291	189	102	62	3	0	0	0	0	0	RNF223	chr1:1007772-1007871
36300	1.53073	0.000320676	chr1	-	1008132	1008171	39	326	256	120	197	136	80	0	0	0	1	0	0	RNF223	chr1:1008132-1008171
36301	1.17647	0.000891775	chr1	-	1154257	1154276	19	160	160	120	140	120	105	0	0	0	0	0	0	SDF4	chr1:1154257-1154276
36302	2.32378	0.00014092	chr1	-	1155497	1155576	79	293	100	178	109	0	0	0	0	0	0	0	0	SDF4	chr1:1155497-1155576
36302	1.26812	0.00042456	chr1	-	1156597	1156656	59	493	618	495	517	298	426	1	3	0	0	0	0	SDF4	chr1:1156597-1156656
36308	2.43581	0.000428601	chr1	-	1228482	1228581	99	274	973	513	271	51	219	1	1	0	2	0	0	ACAP3	chr1:1228482-1228581
36308	2.36364	1.17728e-05	chr1	-	1228882	1228981	99	101	134	185	8	0	0	0	1	1	0	0	0	ACAP3	chr1:1228882-1228981
36309	1.90926	0.0007313	chr1	-	1235714	1235813	99	168	234	329	183	49	8	0	0	0	0	0	0	ACAP3	chr1:1235714-1235813
36309	2.36929	0.000511852	chr1	-	1235834	1235893	59	99	240	52	0	52	5	0	0	0	0	0	1	ACAP3	chr1:1235834-1235893
36309	2	0.000574613	chr1	-	1236074	1236113	39	120	40	120	80	0	0	0	0	0	0	0	0	ACAP3	chr1:1236074-1236113
36310	1.73333	0.000744964	chr1	-	1241715	1241814	99	100	0	112	0	0	0	1	0	1	0	0	0	ACAP3	chr1:1241715-1241814
36310	3.37352	2.62634e-05	chr1	-	1241835	1241954	119	550	364	153	44	19	0	0	0	0	0	0	0	ACAP3	chr1:1241835-1241954
36310	2.14167	0.000421293	chr1	-	1242375	1242434	59	131	139	60	0	0	60	1	0	0	0	0	0	ACAP3	chr1:1242375-1242434
36310	2.24167	0.000283698	chr1	-	1242475	1242534	59	455	264	173	90	90	120	1	0	0	0	0	0	ACAP3	chr1:1242475-1242534
36311	2.94737	0.000174086	chr1	-	1246589	1246808	219	385	639	556	40	60	0	0	0	0	0	0	0	CPSF3L	chr1:1246589-1246808
36312	3.08306	2.47179e-05	chr1	-	1248057	1248156	99	371	95	150	0	1	0	3	0	0	0	0	0	CPSF3L	chr1:1248057-1248156
36312	2.09583	0.000190809	chr1	-	1248757	1248856	99	298	546	196	264	79	0	1	2	1	1	0	0	CPSF3L	chr1:1248757-1248856
36312	1.44419	0.000268763	chr1	-	1249197	1249336	139	948	1350	988	1022	898	232	3	2	0	2	0	0	CPSF3L	chr1:1249197-1249336
36316	1.90414	0.000140594	chr1	-	1322234	1322333	99	681	478	372	16	383	276	8	2	4	0	2	2	CCNL2	chr1:1322234-1322333
36323	1.58803	0.000636257	chr1	-	1572075	1572134	59	250	315	180	240	0	165	0	1	0	0	0	0	CDK11B	chr1:1572075-1572134
36323	2.45257	0.000288146	chr1	-	1572275	1572354	79	210	302	489	108	108	50	0	0	0	0	0	0	CDK11B	chr1:1572275-1572354
36324	3.58311	0.000127838	chr1	-	1572453	1572592	139	855	584	794	197	129	0	1	4	0	0	0	0	CDK11B	chr1:1572453-1572592
36324	2.56761	0.000172814	chr1	-	1572793	1572992	199	751	1377	902	220	52	544	2	0	2	0	0	1	CDK11B	chr1:1572793-1572992
12424	2.50226	5.48586e-05	chr1	+	2238225	2238284	59	144	118	91	40	1	0	3	2	0	0	0	0	SKI	chr1:2238225-2238284
12430	1.79545	0.00023839	chr1	+	2478246	2478285	39	232	259	100	130	60	86	0	0	0	0	0	0		chr1:2478246-2478285
36334	2.25	7.07948e-06	chr1	-	3663525	3663584	59	57	60	108	0	0	0	0	0	0	0	0	0	TP73-AS1	chr1:3663525-3663584
12433	1.70791	0.000523726	chr1	+	6055307	6055386	79	182	420	345	158	108	189	0	0	0	0	0	0	KCNAB2	chr1:6055307-6055386
12433	2.05085	0.000554074	chr1	+	6055547	6055626	79	90	196	79	55	0	0	0	0	0	0	0	0	KCNAB2	chr1:6055547-6055626
12434	2.22176	0.000406122	chr1	+	6055687	6055746	59	60	178	113	0	34	25	0	0	0	0	0	0	KCNAB2	chr1:6055687-6055746
12434	2.57197	0.000221445	chr1	+	6057227	6057386	159	133	358	375	0	0	48	0	1	2	0	0	0	KCNAB2	chr1:6057227-6057386
12436	1.96685	0.000515786	chr1	+	6076276	6076335	59	1	115	60	1	0	0	0	0	0	0	0	0	KCNAB2	chr1:6076276-6076335
12441	2.56592	2.04493e-05	chr1	+	6693221	6693320	99	437	459	400	229	80	13	0	0	0	0	0	0	THAP3	chr1:6693221-6693320
36354	1.71667	0.000645909	chr1	-	8418225	8418284	59	60	13	56	0	0	0	0	0	0	0	0	0	RERE	chr1:8418225-8418284
36354	3.15188	0.00010118	chr1	-	8418405	8418524	119	453	629	397	206	20	0	1	0	1	0	0	0	RERE	chr1:8418405-8418524
36354	1.7033	0.000389371	chr1	-	8418685	8418704	19	93	117	40	78	20	20	0	0	0	1	0	0	RERE	chr1:8418685-8418704
36354	2.38243	0.000330343	chr1	-	8418725	8418784	59	307	338	93	141	9	57	1	0	0	0	0	0	RERE	chr1:8418725-8418784
12456	1.66667	0.000845259	chr1	+	9416681	9416740	59	60	0	60	0	0	0	0	0	0	0	0	0	SPSB1	chr1:9416681-9416740
12496	2.2844	0.000274133	chr1	+	16261564	16261643	79	142	185	180	35	20	32	0	0	0	0	0	0	SPEN	chr1:16261564-16261643
12528	2.62455	0.000205247	chr1	+	24070493	24070572	79	104	128	251	37	0	0	0	0	1	0	0	0	TCEB3	chr1:24070493-24070572
12575	1.38209	0.000257707	chr1	+	27321014	27321073	59	377	690	482	576	169	326	0	0	0	0	0	0	TRNP1	chr1:27321014-27321073
12575	1.3876	0.000993145	chr1	+	27321534	27321553	19	129	59	110	7	110	81	0	0	0	0	0	0	TRNP1	chr1:27321534-27321553
36491	2.93578	3.86944e-05	chr1	-	27427289	27427348	59	117	246	93	15	23	0	0	1	0	0	0	0	SLC9A1	chr1:27427289-27427348
36491	1.95692	0.000571218	chr1	-	27427529	27427588	59	167	112	173	48	97	0	1	0	0	0	0	0	SLC9A1	chr1:27427529-27427588
36492	1.96667	0.000420197	chr1	-	27427880	27427939	59	0	114	60	0	0	0	0	0	0	0	0	0	SLC9A1	chr1:27427880-27427939
36492	2.85833	0.000155606	chr1	-	27428300	27428419	119	202	138	325	0	0	0	1	0	0	0	0	0	SLC9A1	chr1:27428300-27428419
36493	2.72273	7.86089e-05	chr1	-	27480581	27480700	119	838	1132	665	325	247	168	0	0	0	0	0	0	SLC9A1	chr1:27480581-27480700
36493	2.23476	0.00022085	chr1	-	27481121	27481200	79	234	298	210	79	124	0	1	0	1	0	0	0	SLC9A1	chr1:27481121-27481200
36493	1.85221	0.000132758	chr1	-	27481281	27481380	99	703	616	462	226	204	396	1	2	0	0	1	0	SLC9A1	chr1:27481281-27481380
36497	2.17917	5.35936e-05	chr1	-	27874600	27874679	79	133	68	78	0	0	0	0	1	0	0	0	0	AHDC1	chr1:27874600-27874679
36497	1.96346	0.000520293	chr1	-	27874840	27874999	159	128	188	225	40	0	0	0	0	0	0	0	0	AHDC1	chr1:27874840-27874999
36512	1.80448	0.000224949	chr1	-	28859178	28859257	79	536	237	503	386	211	0	2	1	1	3	0	0		chr1:28859178-28859257
36519	0.932726	0.000451149	chr1	-	28908110	28908229	119	4509	4313	3861	9069	2776	1826	14	12	13	20	8	2	SNORA61 SNORA44 SNORA16A SNHG12	chr1:28908110-28908229
36538	3.63939	5.08681e-05	chr1	-	32538704	32538823	119	427	366	270	29	2	0	0	0	0	0	0	0		chr1:32538704-32538823
12640	1.53171	0.000758819	chr1	+	33547082	33547101	19	119	77	58	80	45	20	0	0	0	0	0	0	ADC	chr1:33547082-33547101
12640	1.59913	0.000394295	chr1	+	33547142	33547261	119	908	618	683	484	529	241	1	1	1	0	0	0	ADC	chr1:33547142-33547261
12640	2.16192	0.000115335	chr1	+	33547362	33547441	79	407	480	299	77	125	225	2	0	2	0	0	0	ADC	chr1:33547362-33547441
36577	1.26831	0.000458695	chr1	-	35657492	35657631	139	1187	1880	968	1944	713	429	1	1	1	4	0	0	SFPQ	chr1:35657492-35657631
36578	1.03706	0.000349657	chr1	-	35658225	35658304	79	2040	2059	1253	3686	537	911	6	5	4	10	2	7	SFPQ	chr1:35658225-35658304
36578	1.24158	0.000166286	chr1	-	35658405	35658504	99	2171	2221	1585	1974	1534	1247	3	3	0	0	4	1	SFPQ	chr1:35658405-35658504
36632	2.07834	0.000571671	chr1	-	40366673	40366712	39	142	145	40	97	0	0	1	0	0	0	0	0	MYCL1	chr1:40366673-40366712
36632	2.55578	8.08962e-05	chr1	-	40366773	40366972	199	743	527	623	286	0	91	0	0	1	0	0	0	MYCL1	chr1:40366773-40366972
36632	1.92147	0.000257211	chr1	-	40367073	40367152	79	283	501	432	189	188	147	2	1	0	0	0	0	MYCL1	chr1:40367073-40367152
12747	2.1768	0.000339958	chr1	+	45266347	45266386	39	40	115	115	0	0	61	1	0	0	0	0	0	PLK3	chr1:45266347-45266386
12764	1.97866	0.000489229	chr1	+	46088034	46088153	119	341	258	420	230	113	0	2	1	0	0	0	0		chr1:46088034-46088153
12764	2.7492	4.32142e-05	chr1	+	46088174	46088273	99	200	191	164	8	3	0	0	0	0	0	0	0		chr1:46088174-46088273
12764	2.30087	4.4479e-05	chr1	+	46088454	46088533	79	321	539	219	0	175	160	0	0	1	0	0	0		chr1:46088454-46088533
12764	2.14121	0.000386866	chr1	+	46088954	46089033	79	230	153	120	77	30	0	0	0	0	0	0	0		chr1:46088954-46089033
12772	2.2543	0.000249618	chr1	+	46152672	46152731	59	218	153	97	0	0	111	1	0	1	0	0	0	TMEM69	chr1:46152672-46152731
12780	2.05	7.5931e-05	chr1	+	46500599	46500658	59	60	57	68	0	0	0	0	0	1	0	0	0	MAST2	chr1:46500599-46500658
36757	2.61111	3.2894e-05	chr1	-	59248158	59248197	39	103	160	40	42	0	0	0	0	0	0	0	0	JUN	chr1:59248158-59248197
36794	1.87778	0.000190337	chr1	-	67895134	67895193	59	60	50	48	0	0	0	0	0	0	0	0	0	SERBP1	chr1:67895134-67895193
36794	2.22944	0.000263478	chr1	-	67895214	67895333	119	203	211	252	87	0	15	0	0	1	0	0	0	SERBP1	chr1:67895214-67895333
12854	2.16448	0.000276846	chr1	+	70687091	70687170	79	419	603	213	186	20	233	1	2	0	1	0	1	SRSF11	chr1:70687091-70687170
12854	1.14053	0.000842011	chr1	+	70698031	70698050	19	146	186	168	143	156	132	0	0	0	0	0	0	SRSF11	chr1:70698031-70698050
36868	1.66667	0.000973283	chr1	-	85724843	85724902	59	0	60	60	0	0	0	0	0	0	0	0	0	C1orf52	chr1:85724843-85724902
36955	1.46796	0.000672116	chr1	-	110282354	110282393	39	263	150	223	168	107	120	0	0	0	0	0	0	GSTM3	chr1:110282354-110282393
13065	1.30667	0.00056969	chr1	+	118148824	118148903	79	871	607	447	1014	184	225	1	0	1	0	0	0	FAM46C	chr1:118148824-118148903
37035	1.36818	6.70869e-05	chr1	-	143278759	143278858	99	2251	2690	1584	2109	1380	1224	7	7	4	2	2	3		chr1:143278759-143278858
13148	0.951136	0.000415734	chr1	+	143283568	143283667	99	4933	5159	3548	4224	5548	4621	11	19	13	12	12	12		chr1:143283568-143283667
13148	1.14539	0.000136233	chr1	+	143283768	143283847	79	1744	2976	1566	300	3234	1976	20	41	17	2	32	21		chr1:143283768-143283847
37064	1.3	0.000905013	chr1	-	145826788	145826807	19	82	157	91	215	25	0	0	0	0	0	0	0	GPR89A	chr1:145826788-145826807
37064	1.82385	0.000230784	chr1	-	145826828	145826887	59	293	351	162	203	128	34	1	0	1	0	0	0	GPR89A	chr1:145826828-145826887
37069	2.6768	0.00011898	chr1	-	146551148	146551247	99	239	187	235	32	30	0	1	0	1	0	0	0		chr1:146551148-146551247
37069	2.42609	0.000150496	chr1	-	146551448	146551487	39	135	104	195	110	0	0	0	0	1	0	0	0		chr1:146551448-146551487
37069	1.96863	0.000305573	chr1	-	146551648	146551687	39	94	190	94	135	0	0	1	0	0	0	0	0		chr1:146551648-146551687
37070	2.39394	0.000226208	chr1	-	146551967	146552146	179	617	493	317	205	80	0	0	2	0	0	0	0		chr1:146551967-146552146
13212	1.66148	0.000210742	chr1	+	147400851	147400910	59	179	555	355	171	120	300	1	1	1	0	0	0	GPR89B	chr1:147400851-147400910
37170	0.894401	0.00072301	chr1	-	150551566	150551625	59	1249	1759	1285	3086	775	962	1	2	1	2	1	1	MCL1	chr1:150551566-150551625
37170	1.19863	0.000274435	chr1	-	150551886	150551945	59	1063	694	670	791	703	517	4	1	1	1	0	0	MCL1	chr1:150551886-150551945
13261	1.66667	0.000973283	chr1	+	151260784	151260843	59	0	60	60	0	0	0	0	0	0	0	0	0	ZNF687	chr1:151260784-151260843
37224	1.53153	0.000534923	chr1	-	153924484	153924503	19	100	140	40	82	20	60	0	0	0	0	0	0	CRTC2	chr1:153924484-153924503
37224	1.80602	0.000269548	chr1	-	153924544	153924663	119	614	623	422	104	218	443	0	4	1	0	0	1	CRTC2	chr1:153924544-153924663
37228	2.37739	0.00020022	chr1	-	153950169	153950288	119	236	280	349	82	80	0	1	1	2	0	0	0	JTB	chr1:153950169-153950288
37228	2.40664	0.000265971	chr1	-	153950489	153950568	79	132	208	0	0	0	1	0	0	0	0	0	0	JTB	chr1:153950489-153950568
13326	3.05291	0.000310071	chr1	+	154321580	154321639	59	82	208	103	9	0	0	0	0	1	0	0	0	ATP8B2	chr1:154321580-154321639
37277	1.28285	0.00060591	chr1	-	155239309	155239388	79	645	699	398	619	476	210	0	0	0	0	0	0	CLK2	chr1:155239309-155239388
13380	1.6248	0.000134518	chr1	+	156186291	156186650	359	64932	49742	41013	63468	16676	15240	637	516	436	644	180	159	PMF1-BGLAP PMF1	chr1:156186291-156186650
37325	1.79683	0.000209709	chr1	-	156186371	156186590	219	3575	3043	1746	2822	864	675	15	15	9	13	4	5		chr1:156186371-156186590
37353	1.35897	0.000847408	chr1	-	156909678	156909697	19	103	133	75	108	60	45	0	0	0	0	0	0	ARHGEF11	chr1:156909678-156909697
13422	1.20267	0.000659175	chr1	+	161228784	161228863	79	661	806	451	802	392	363	1	1	0	1	0	0	PCP4L1	chr1:161228784-161228863
13431	2.06914	7.53398e-05	chr1	+	161369870	161369949	79	334	859	628	377	30	343	0	0	1	2	0	0		chr1:161369870-161369949
13538	2.25312	0.000610468	chr1	+	171753430	171753489	59	264	100	173	43	37	60	0	1	0	0	0	0	METTL13	chr1:171753430-171753489
37741	2.18788	0.000306717	chr1	-	173446753	173446792	39	121	80	40	40	5	0	0	0	0	0	0	0	LOC100506023	chr1:173446753-173446792
37848	1.11065	0.000776725	chr1	-	173793368	173793427	59	482	717	474	678	345	469	0	0	1	0	0	0	CENPL	chr1:173793368-173793427
37848	1.68863	0.000313728	chr1	-	173793508	173793567	59	156	386	295	219	140	68	1	0	1	0	0	0	CENPL	chr1:173793508-173793567
13623	1.68889	0.000718093	chr1	+	179923837	179923896	59	60	0	60	0	0	0	1	0	0	0	0	0	CEP350	chr1:179923837-179923896
13647	3.5641	7.36107e-05	chr1	+	180904250	180904349	99	273	379	156	12	0	0	1	0	0	0	0	0	KIAA1614	chr1:180904250-180904349
13647	2.20408	0.000300032	chr1	+	180904850	180904909	59	102	278	196	66	37	60	0	0	0	0	0	0	KIAA1614	chr1:180904850-180904909
13647	1.45815	0.000782149	chr1	+	180905510	180905549	39	118	280	144	240	54	40	0	0	0	0	0	0	KIAA1614	chr1:180905510-180905549
13647	2.01706	0.000361592	chr1	+	180905670	180905709	39	221	114	136	48	51	74	0	0	0	0	0	0	KIAA1614	chr1:180905670-180905709
13654	1.89249	0.000260519	chr1	+	181058103	181058182	79	277	493	263	154	282	3	1	2	0	0	0	0	IER5	chr1:181058103-181058182
13654	2.40696	5.28584e-05	chr1	+	181058323	181058522	199	1513	1391	1801	866	668	76	1	2	3	1	0	0	IER5	chr1:181058323-181058522
13654	1.2685	0.000245035	chr1	+	181058943	181059222	279	4628	5622	4227	5462	2727	3052	2	5	0	3	0	1	IER5	chr1:181058943-181059222
13654	1.11247	0.000319758	chr1	+	181059423	181059522	99	2257	1655	1592	2150	1807	959	0	1	2	1	2	0	IER5	chr1:181059423-181059522
13674	2.32558	5.61208e-05	chr1	+	182993182	182993221	39	211	145	120	0	72	66	1	0	0	0	0	0	LAMC1	chr1:182993182-182993221
38039	1.33348	0.000510217	chr1	-	197115316	197115435	119	836	1142	725	982	458	498	1	1	1	1	0	1	ASPM	chr1:197115316-197115435
14568	2.0119	0.000322927	chr1	+	200708409	200708488	79	236	322	188	253	0	11	2	4	1	0	0	0	CAMSAP2	chr1:200708409-200708488
14586	1.99384	0.00020553	chr1	+	202317896	202318075	179	767	1590	949	630	178	595	3	4	2	1	0	0	PPP1R12B	chr1:202317896-202318075
38109	2.26875	0.000204209	chr1	-	202935623	202935662	39	108	67	68	40	0	0	0	0	0	0	0	0	CYB5R1	chr1:202935623-202935662
38113	1.34971	0.00012333	chr1	-	204380560	204380659	99	1877	1324	1072	1951	597	532	0	2	2	2	1	2	PPP1R15B	chr1:204380560-204380659
38124	2.47619	0.000123381	chr1	-	205272972	205273031	59	108	120	60	9	0	0	0	0	0	0	0	0	NUAK2	chr1:205272972-205273031
14655	1.1099	0.000420991	chr1	+	212782225	212782284	59	586	1120	534	1085	377	540	2	2	2	2	1	2	ATF3	chr1:212782225-212782284
14657	2.13319	0.000737058	chr1	+	213032076	213032135	59	412	120	289	120	120	49	0	0	2	0	1	0	FLVCR1	chr1:213032076-213032135
38248	2.20513	0.000324471	chr1	-	224621198	224621237	39	65	94	147	75	0	0	0	0	1	0	0	0	WDR26	chr1:224621198-224621237
38248	1.18544	0.000294778	chr1	-	224621398	224621497	99	1716	1447	1254	1715	714	1267	2	0	3	0	0	0	WDR26	chr1:224621398-224621497
38248	3.23607	0.000244607	chr1	-	224621578	224621717	139	688	1695	1101	241	132	423	4	4	3	0	0	1	WDR26	chr1:224621578-224621717
38248	3.28929	3.04937e-05	chr1	-	224621778	224622157	379	3760	4630	3446	1802	479	551	18	11	13	3	1	2	WDR26	chr1:224621778-224622157
14753	1.81029	0.000355962	chr1	+	228328218	228328297	79	260	421	310	335	67	34	0	0	0	1	0	0	GUK1	chr1:228328218-228328297
14753	1.73438	0.0003197	chr1	+	228328658	228328677	19	125	60	88	59	53	20	0	0	0	0	0	0	GUK1	chr1:228328658-228328677
14753	1.2814	0.000823842	chr1	+	228328778	228328837	59	417	359	344	339	335	173	2	2	0	0	0	0	GUK1	chr1:228328778-228328837
14753	1.93333	0.00013926	chr1	+	228328998	228329057	59	191	433	199	120	165	60	0	2	1	0	0	0	GUK1	chr1:228328998-228329057
14753	1.97589	0.000413683	chr1	+	228329338	228329377	39	336	334	603	303	103	179	0	0	0	0	0	0	GUK1	chr1:228329338-228329377
14753	2.15451	7.21301e-05	chr1	+	228329458	228329597	139	1397	750	939	611	323	273	1	0	1	0	1	0	GUK1	chr1:228329458-228329597
14753	2.17471	7.9889e-05	chr1	+	228329898	228329997	99	990	1148	388	659	342	0	1	2	0	1	0	0	GUK1	chr1:228329898-228329997
14753	1.96958	0.000384974	chr1	+	228330398	228330457	59	441	240	175	137	76	133	0	0	0	0	0	0	GUK1	chr1:228330398-228330457
38320	1.66667	0.000845259	chr1	-	235292231	235292290	59	60	0	60	0	0	0	0	0	0	0	0	0	TOMM20 SNORA14B	chr1:235292231-235292290
38387	1.93467	8.72785e-05	chr1	-	247095142	247095181	39	170	293	187	69	108	101	0	0	0	0	0	0	AHCTF1	chr1:247095142-247095181
491	2.1773	0.000298175	chr10	+	26937130	26937189	59	120	168	146	22	10	70	0	0	0	0	0	0	LOC731789	chr10:26937130-26937189
563	1.19765	0.000802815	chr10	+	42971280	42971299	19	157	140	140	246	85	30	2	0	1	0	1	0	LOC84856	chr10:42971280-42971299
692	1.72202	0.000263751	chr10	+	74034117	74034216	99	619	549	467	452	237	137	0	0	1	0	0	0	DDIT4	chr10:74034117-74034216
692	1.54726	0.0007085	chr10	+	74034717	74034736	19	123	88	40	101	20	20	0	0	0	0	0	0	DDIT4	chr10:74034717-74034736
7880	1.71111	0.000724938	chr10	-	74927881	74927940	59	0	60	60	0	0	0	0	0	2	0	0	0	ECD	chr10:74927881-74927940
7885	1.53358	0.000351385	chr10	-	75006786	75006845	59	326	278	468	277	241	121	0	1	0	0	0	0	DNAJC9 MRPS16	chr10:75006786-75006845
719	2.26667	0.000267537	chr10	+	76970740	76970839	99	182	0	190	0	0	0	0	0	2	0	0	0	VDAC2	chr10:76970740-76970839
7940	1.88333	0.0003197	chr10	-	98346316	98346375	59	69	33	57	0	0	0	0	0	0	0	0	0	TM9SF3	chr10:98346316-98346375
7944	1.29813	0.000289793	chr10	-	99116664	99116723	59	523	583	714	657	365	343	1	2	1	1	1	0	RRP12	chr10:99116664-99116723
7946	2.94763	0.00024159	chr10	-	99126421	99126660	239	1930	1071	2297	489	508	326	1	0	0	0	0	0	RRP12	chr10:99126421-99126660
7947	1.81667	0.000519519	chr10	-	99130574	99130633	59	47	47	53	0	0	0	0	0	0	0	0	0	RRP12	chr10:99130574-99130633
7947	1.77953	9.13826e-05	chr10	-	99130734	99130873	139	816	1241	1006	978	529	37	3	0	0	0	0	0	RRP12	chr10:99130734-99130873
7947	2.08725	0.000492501	chr10	-	99130934	99131013	79	187	374	124	206	0	1	1	1	0	0	0	0	RRP12	chr10:99130934-99131013
7983	2.055	0.000434733	chr10	-	103577583	103577622	39	116	91	80	40	40	0	0	1	0	0	0	0	MGEA5	chr10:103577583-103577622
865	1.24253	0.000464307	chr10	+	104118382	104118441	59	563	541	500	837	302	120	1	0	0	0	0	0	GBF1	chr10:104118382-104118441
867	1.43154	0.000845325	chr10	+	104135215	104135254	39	227	177	162	132	183	43	0	0	1	0	1	0	GBF1	chr10:104135215-104135254
869	2.35073	0.00032846	chr10	+	104141862	104141961	99	155	518	460	218	95	0	1	1	0	0	0	0	GBF1	chr10:104141862-104141961
869	1.15682	0.000686577	chr10	+	104142062	104142081	19	135	233	140	206	110	115	0	0	0	0	0	0	GBF1	chr10:104142062-104142081
919	2.15359	0.000215106	chr10	+	112258554	112258653	99	169	84	106	6	0	0	0	0	0	0	0	0	DUSP5	chr10:112258554-112258653
8034	2.73988	7.38712e-05	chr10	-	119134310	119134429	119	562	416	417	113	169	0	0	0	1	0	0	0	PDZD8	chr10:119134310-119134429
8092	2.0331	0.000367848	chr10	-	129924432	129924531	99	404	254	500	268	0	157	1	1	2	0	0	0	MKI67	chr10:129924432-129924531
8095	2.4802	0.000285646	chr10	-	135106838	135106897	59	105	119	97	0	22	0	0	0	0	0	0	0	TUBGCP2	chr10:135106838-135106897
8095	2.47778	0.000324487	chr10	-	135106998	135107057	59	105	93	60	0	0	0	2	0	0	0	0	0	TUBGCP2	chr10:135106998-135107057
26736	2.44503	0.000108463	chr11	+	209265	209324	59	56	119	112	11	0	0	0	0	0	0	0	0	RIC8A	chr11:209265-209324
26742	2.21974	0.00025934	chr11	+	451716	451835	119	238	283	311	0	92	85	0	0	0	0	0	0	PTDSS2	chr11:451716-451835
26745	1.40454	0.000616378	chr11	+	607404	607483	79	577	416	429	202	294	453	1	0	1	0	0	0	PHRF1	chr11:607404-607483
26745	1.79007	0.000550276	chr11	+	609164	609223	59	180	178	255	113	150	0	0	0	0	0	0	0	PHRF1	chr11:609164-609223
26745	2.51528	0.000166237	chr11	+	609744	609863	119	120	398	274	24	40	34	0	0	0	0	0	0	PHRF1	chr11:609744-609863
26746	3.5313	0.000121912	chr11	+	610126	610285	159	741	459	383	0	0	107	2	3	1	0	0	1	PHRF1	chr11:610126-610285
26753	1.69712	0.000263456	chr11	+	820074	820113	39	236	245	101	172	85	39	0	1	0	0	0	0	PNPLA2	chr11:820074-820113
26753	0.998567	0.000986421	chr11	+	822534	822553	19	245	277	115	200	232	206	0	0	0	0	0	0	PNPLA2	chr11:822534-822553
26754	2.70439	3.83864e-05	chr11	+	823695	823814	119	621	1018	1072	501	214	65	2	0	1	0	0	0	PNPLA2	chr11:823695-823814
26755	2.23957	3.6331e-05	chr11	+	824560	824679	119	788	725	436	602	0	61	0	0	0	2	0	0	PNPLA2	chr11:824560-824679
26755	1.32091	0.000219972	chr11	+	824800	824939	139	1619	2217	1619	1898	1722	425	5	2	4	1	2	1	PNPLA2	chr11:824800-824939
26755	2.08333	0.000239211	chr11	+	825260	825399	139	137	227	91	0	0	0	0	0	0	0	0	0	PNPLA2	chr11:825260-825399
33065	2.35336	0.000106141	chr11	-	1327157	1327216	59	142	230	114	0	0	103	0	0	0	0	0	0	TOLLIP	chr11:1327157-1327216
26757	2.952	2.08848e-05	chr11	+	1374550	1374629	79	74	265	155	0	0	10	0	1	0	0	0	0		chr11:1374550-1374629
26757	3.3119	2.68656e-05	chr11	+	1374970	1375049	79	425	218	147	64	0	7	0	0	0	0	0	0		chr11:1374970-1375049
26757	1.95417	0.000125683	chr11	+	1375630	1375709	79	79	77	69	0	0	0	1	0	0	0	0	0		chr11:1375630-1375709
33069	1.96062	2.50213e-05	chr11	-	2246159	2246198	39	822	697	647	315	362	371	0	0	1	0	0	0		chr11:2246159-2246198
26760	2.11878	0.000196167	chr11	+	2399246	2399365	119	106	108	185	2	0	0	1	0	1	0	0	0	CD81	chr11:2399246-2399365
26760	1.43399	0.000379357	chr11	+	2399486	2399525	39	219	370	160	373	40	69	0	0	0	1	0	0	CD81	chr11:2399486-2399525
26762	1.66667	0.000845259	chr11	+	2422096	2422155	59	60	0	60	0	0	0	0	0	0	0	0	0	TSSC4	chr11:2422096-2422155
26762	1.98718	0.000378934	chr11	+	2422776	2422835	59	129	281	177	187	23	0	1	1	0	0	0	0	TSSC4	chr11:2422776-2422835
26887	2.14667	0.000416914	chr11	+	34074264	34074363	99	161	171	0	0	0	0	2	1	0	0	0	0	CAPRIN1	chr11:34074264-34074363
33275	1.48655	0.000787151	chr11	-	34218816	34218855	39	271	147	121	122	200	0	1	0	0	0	1	0	ABTB2	chr11:34218816-34218855
33276	1.63249	0.000285445	chr11	-	34378377	34378436	59	334	400	296	160	246	165	0	1	3	0	0	0	ABTB2	chr11:34378377-34378436
33276	1.45833	0.000941703	chr11	-	34378937	34378956	19	40	121	121	100	60	20	1	0	1	0	0	0	ABTB2	chr11:34378937-34378956
33276	1.66336	0.000402625	chr11	-	34379017	34379156	139	565	910	616	551	251	290	0	1	0	0	0	0	ABTB2	chr11:34379017-34379156
33276	1.33766	0.000985566	chr11	-	34379297	34379316	19	195	80	180	158	63	100	0	0	0	0	0	1	ABTB2	chr11:34379297-34379316
26980	2.04719	0.00016445	chr11	+	61896161	61896240	79	190	411	287	199	30	82	0	0	0	0	0	0	INCENP	chr11:61896161-61896240
26981	1.42353	0.000756623	chr11	+	61897785	61897804	19	144	81	78	137	27	27	0	0	0	1	0	0	INCENP	chr11:61897785-61897804
26989	1.41227	0.000535179	chr11	+	62434114	62434153	39	184	339	186	147	202	118	0	0	0	0	0	0	SNORA57 METTL12	chr11:62434114-62434153
26992	1.97436	0.000517285	chr11	+	62439862	62439901	39	158	92	92	34	40	40	0	0	0	0	0	0	C11orf83	chr11:62439862-62439901
33414	2.28053	0.000504286	chr11	-	62573031	62573090	59	119	293	91	75	48	0	1	1	0	0	0	0	NXF1 STX5	chr11:62573031-62573090
33414	1.97097	0.000609012	chr11	-	62573151	62573210	59	163	204	60	120	0	10	0	1	0	0	0	0	NXF1 STX5	chr11:62573151-62573210
33424	1.20263	0.000656118	chr11	-	62602959	62603018	59	461	525	478	602	302	283	0	0	0	0	0	0	WDR74	chr11:62602959-62603018
33426	2.67269	0.000198417	chr11	-	62606774	62606953	179	1184	2184	1229	1153	181	55	4	4	2	2	0	0	WDR74	chr11:62606774-62606953
33436	0.975207	0.000829143	chr11	-	63952693	63952712	19	243	311	330	286	320	302	0	0	0	0	0	0		chr11:63952693-63952712
33445	1.34906	0.000634307	chr11	-	64535592	64535611	19	100	140	129	103	95	60	0	0	0	0	0	0	SF1	chr11:64535592-64535611
33454	1.76571	0.000333576	chr11	-	64644243	64644322	79	250	411	327	145	231	84	1	1	0	0	0	0	EHD1	chr11:64644243-64644322
33454	2.50331	7.36643e-05	chr11	-	64644363	64644402	39	129	94	35	4	0	27	0	0	0	0	0	0	EHD1	chr11:64644363-64644402
33454	1.74074	0.00071938	chr11	-	64644663	64644702	39	112	150	135	86	40	51	0	0	0	0	0	0	EHD1	chr11:64644663-64644702
33454	2.01674	0.000323858	chr11	-	64644743	64644782	39	149	90	123	97	7	15	0	0	0	0	0	0	EHD1	chr11:64644743-64644782
33454	2.70563	2.3577e-05	chr11	-	64645183	64645242	59	177	71	181	31	0	20	1	2	1	0	0	0	EHD1	chr11:64645183-64645242
33454	2.86792	7.49664e-06	chr11	-	64645403	64645522	119	323	479	358	45	0	125	0	0	0	0	0	0	EHD1	chr11:64645403-64645522
33454	1.76089	0.000210341	chr11	-	64645563	64645662	99	612	1072	390	755	84	216	1	2	0	0	0	0	EHD1	chr11:64645563-64645662
33454	1.45664	0.000438241	chr11	-	64645683	64645742	59	377	485	344	384	171	222	1	0	1	0	0	0	EHD1	chr11:64645683-64645742
33454	1.12487	0.000448423	chr11	-	64645783	64645862	79	1318	813	946	1118	891	698	0	1	3	1	1	2	EHD1	chr11:64645783-64645862
33455	3.11875	2.35932e-06	chr11	-	64673867	64673906	39	116	191	72	40	0	0	0	0	0	0	0	0	ATG2A	chr11:64673867-64673906
33455	2.48947	7.90163e-05	chr11	-	64674347	64674406	59	85	148	60	10	0	0	0	0	0	0	0	0	ATG2A	chr11:64674347-64674406
33455	2.52778	0.000386709	chr11	-	64674727	64674786	59	371	121	238	120	60	0	0	0	0	0	0	0	ATG2A	chr11:64674727-64674786
33455	2.82895	0.000134197	chr11	-	64674807	64674866	59	239	93	133	48	0	0	0	0	0	0	0	0	ATG2A	chr11:64674807-64674866
33456	2.13128	0.0002807	chr11	-	64678595	64678674	79	278	476	317	129	0	248	1	0	0	0	0	0	ATG2A	chr11:64678595-64678674
33456	2.66242	1.1498e-05	chr11	-	64678735	64678834	99	213	170	149	14	0	0	0	1	0	0	0	0	ATG2A	chr11:64678735-64678834
33456	3.22353	0.00020187	chr11	-	64679375	64679474	99	232	467	93	0	40	0	0	1	0	0	0	0	ATG2A	chr11:64679375-64679474
33456	2.17857	8.3022e-05	chr11	-	64679635	64679654	19	118	53	74	60	20	0	0	0	0	0	0	0	ATG2A	chr11:64679635-64679654
33457	2.29236	0.000381502	chr11	-	64681280	64681359	79	877	857	237	620	41	67	1	1	0	0	0	0	ATG2A	chr11:64681280-64681359
33457	2.23592	0.000294589	chr11	-	64681480	64681539	59	127	205	119	44	60	0	0	1	0	0	0	0	ATG2A	chr11:64681480-64681539
33461	3.45818	1.69637e-06	chr11	-	64884131	64884230	99	1176	696	582	257	185	59	3	0	1	0	0	0	ZNHIT2	chr11:64884131-64884230
33461	2.72047	0.000233383	chr11	-	64884431	64884630	199	180	333	502	1	0	0	0	1	4	0	0	0	ZNHIT2	chr11:64884431-64884630
33461	1.85714	0.000345577	chr11	-	64884891	64884970	79	257	248	391	301	75	0	0	0	2	0	0	0	ZNHIT2	chr11:64884891-64884970
33464	1.43614	0.000302692	chr11	-	64900116	64900175	59	496	432	402	266	240	371	0	1	1	0	0	0	SYVN1	chr11:64900116-64900175
27050	2.2439	0.000214999	chr11	+	65386055	65386094	39	89	80	79	37	7	0	0	0	0	0	0	0	PCNXL3	chr11:65386055-65386094
27052	1.86667	0.000212342	chr11	+	65629648	65629707	59	60	48	48	0	0	0	0	0	0	0	0	0	MUS81	chr11:65629648-65629707
27093	2.27	9.73741e-06	chr11	+	67159247	67159346	99	193	99	85	0	0	0	0	1	0	0	0	0	LOC100130987 RAD9A	chr11:67159247-67159346
33486	2.5506	5.00916e-05	chr11	-	67187219	67187338	119	513	378	232	223	0	0	1	0	0	0	0	0		chr11:67187219-67187338
33486	2.19298	0.000278462	chr11	-	67187359	67187398	39	108	58	89	0	40	11	0	0	0	0	0	0		chr11:67187359-67187398
33488	2.24862	0.000137296	chr11	-	67274222	67274281	59	166	173	287	122	60	0	0	1	1	0	0	0	CDK2AP2 PITPNM1	chr11:67274222-67274281
27138	1.27179	0.00062243	chr11	+	75110820	75110839	19	213	111	108	182	45	103	0	1	0	0	0	0	SNORD15A RPS3	chr11:75110820-75110839
33711	2.01116	0.000248139	chr11	-	85374913	85375252	339	3218	3946	3101	2049	962	1584	6	4	6	5	1	1	CREBZF	chr11:85374913-85375252
33711	1.77342	9.87644e-05	chr11	-	85375613	85375672	59	329	531	568	553	122	63	2	2	1	0	0	0	CREBZF	chr11:85375613-85375672
33711	1.34868	0.000681957	chr11	-	85375693	85375712	19	60	160	126	180	60	0	0	0	1	1	0	0	CREBZF	chr11:85375693-85375712
33822	1.70183	0.000445891	chr11	-	118962777	118962876	99	394	353	522	281	121	227	0	3	0	0	0	0	H2AFX	chr11:118962777-118962876
33822	2.09197	0.000106808	chr11	-	118963057	118963136	79	409	408	190	270	0	88	0	1	0	0	0	0	H2AFX	chr11:118963057-118963136
33822	1.81854	0.000316847	chr11	-	118963197	118963256	59	200	272	266	87	60	180	0	1	0	0	0	0	H2AFX	chr11:118963197-118963256
33822	0.834943	0.000990156	chr11	-	118964677	118964696	19	667	545	528	808	688	607	0	1	3	0	0	3	H2AFX	chr11:118964677-118964696
33822	1.0992	0.000381367	chr11	-	118964757	118964816	59	546	1148	986	1090	951	402	2	2	4	1	1	0	H2AFX	chr11:118964757-118964816
33822	1.21844	0.00061863	chr11	-	118964837	118964876	39	372	276	338	418	213	160	0	0	1	0	0	0	H2AFX	chr11:118964837-118964876
33822	3.36021	7.14427e-05	chr11	-	118964957	118965276	319	4026	4649	1711	1247	815	372	5	10	3	0	0	1	H2AFX	chr11:118964957-118965276
33822	2.43081	6.62852e-05	chr11	-	118965297	118965356	59	357	273	109	70	127	6	1	0	2	0	0	0	H2AFX DPAGT1	chr11:118965297-118965356
33822	2.44872	0.000114453	chr11	-	118965557	118965616	59	133	205	246	49	54	29	0	0	0	0	0	0	H2AFX DPAGT1	chr11:118965557-118965616
27281	1.41112	0.000557945	chr11	+	120207309	120207348	39	501	287	239	477	126	80	2	2	1	4	0	2	ARHGEF12	chr11:120207309-120207348
27281	1.511	0.000326265	chr11	+	120207389	120207428	39	356	177	228	341	80	38	1	1	1	1	1	1	ARHGEF12	chr11:120207389-120207428
38909	2.59298	0.000497414	chr12	-	294618	294677	59	60	237	254	0	60	45	0	1	1	0	0	0		chr12:294618-294677
38909	2.56432	4.56859e-05	chr12	-	294918	295017	99	434	452	660	129	200	94	1	0	1	0	0	0		chr12:294918-295017
27953	1.98333	0.000574174	chr12	+	862154	862213	59	60	117	0	0	0	0	0	0	0	0	0	0	WNK1	chr12:862154-862213
27953	1.20961	0.000529222	chr12	+	862754	862773	19	120	247	119	300	20	78	0	2	0	0	0	0	WNK1	chr12:862754-862773
27953	1.59784	0.000326356	chr12	+	862894	862953	59	403	346	398	477	136	40	0	0	1	0	0	0	WNK1	chr12:862894-862953
27953	1.27983	0.000541187	chr12	+	863154	863273	119	1034	841	707	1117	426	411	4	5	1	3	1	0	WNK1	chr12:863154-863273
38917	1.94551	0.000186869	chr12	-	1702967	1703006	39	233	153	97	112	40	40	1	0	0	0	0	0	FBXL14	chr12:1702967-1703006
28025	1.18974	0.000908941	chr12	+	6640166	6640185	19	80	210	110	180	90	60	0	0	1	0	0	0	NCAPD2	chr12:6640166-6640185
28040	2.48293	5.10238e-05	chr12	+	6976977	6977416	439	7139	6210	5736	3377	1757	1759	12	14	18	5	7	7	TPI1 USP5	chr12:6976977-6977416
28040	1.03821	0.000585368	chr12	+	6977437	6977476	39	697	460	757	795	652	396	1	0	0	0	0	0	TPI1 USP5	chr12:6977437-6977476
28040	1.41412	0.000522409	chr12	+	6981977	6981996	19	108	297	136	182	80	103	0	0	0	0	0	0	TPI1	chr12:6981977-6981996
28040	1.53251	0.000743548	chr12	+	6982037	6982096	59	288	664	227	298	235	179	2	0	0	0	0	0	TPI1	chr12:6982037-6982096
28040	2.11588	0.000292716	chr12	+	6982237	6982316	79	247	191	296	65	68	89	0	1	2	0	1	0		chr12:6982237-6982316
28049	4.13386	8.90613e-05	chr12	+	7055237	7055316	79	480	72	258	14	0	0	0	0	0	0	0	0	C12orf57 PTPN6	chr12:7055237-7055316
39009	1.98641	9.11447e-05	chr12	-	10875769	10875808	39	179	196	232	232	16	0	0	0	1	0	0	0	CSDA	chr12:10875769-10875808
28096	2.29485	0.000387532	chr12	+	13154504	13154663	159	287	44	294	5	0	0	1	0	1	0	0	0	HTR7P1	chr12:13154504-13154663
39071	1.50976	0.000653866	chr12	-	25538922	25538961	39	206	189	177	97	167	73	0	1	0	0	0	1		chr12:25538922-25538961
39243	2.2875	0.000191898	chr12	-	49942369	49942528	159	160	357	101	0	0	0	0	0	0	0	0	0		chr12:49942369-49942528
39248	1.87341	0.000207547	chr12	-	50190931	50191050	119	525	626	670	556	78	179	1	1	4	1	0	0	NCKAP5L	chr12:50190931-50191050
39249	2.29375	0.000171666	chr12	-	50219681	50219720	39	127	80	40	40	0	0	0	0	0	0	0	0	NCKAP5L	chr12:50219681-50219720
39250	1.68889	0.000718093	chr12	-	50221891	50221950	59	60	0	60	0	0	0	1	0	0	0	0	0	NCKAP5L	chr12:50221891-50221950
39274	1.66667	0.000845259	chr12	-	53574505	53574604	99	100	0	100	0	0	0	0	0	0	0	0	0	CSAD	chr12:53574505-53574604
28694	1.05576	0.000405042	chr12	+	53848534	53848553	19	499	258	353	526	271	251	0	0	1	1	0	0	PCBP2	chr12:53848534-53848553
28754	2.2459	0.000866586	chr12	+	56512196	56512235	39	231	111	78	80	0	40	2	0	0	0	0	1	RPL41 ZC3H10	chr12:56512196-56512235
39328	2.25833	0.000277806	chr12	-	56740517	56740596	79	95	38	165	0	0	0	0	1	0	0	0	0	STAT2	chr12:56740517-56740596
28823	1.31579	0.000551307	chr12	+	62860863	62860882	19	120	155	140	220	40	41	0	0	0	0	0	0	MON2	chr12:62860863-62860882
28904	2.51944	0.000121291	chr12	+	69633845	69633964	119	225	302	0	0	0	0	1	4	0	0	0	0	CPSF6	chr12:69633845-69633964
39399	2.26415	0.000286594	chr12	-	72056999	72057158	159	495	838	583	112	237	227	1	0	0	1	0	0	ZFC3H1	chr12:72056999-72057158
39449	1.89307	5.46434e-05	chr12	-	76953165	76953284	119	1663	2247	1418	1691	639	332	5	3	4	2	0	0	OSBPL8	chr12:76953165-76953284
39773	0.927894	0.000729105	chr12	-	92538370	92538409	39	754	994	565	386	1215	906	2	0	1	1	0	1	LOC256021 BTG1	chr12:92538370-92538409
39773	1.41901	7.08886e-05	chr12	-	92538590	92538669	79	944	1650	1310	612	1232	865	0	10	3	0	0	2	BTG1	chr12:92538590-92538669
39773	1.91961	0.000162068	chr12	-	92538690	92539089	399	11000	11707	8281	5386	6226	4016	19	21	8	5	4	1	BTG1	chr12:92538690-92539089
39773	1.05557	0.000411576	chr12	-	92539130	92539229	99	2065	1929	1165	2100	1358	1405	3	0	0	2	2	1	BTG1	chr12:92539130-92539229
39773	1.7619	0.000336731	chr12	-	92539370	92539429	59	223	178	229	67	57	158	0	0	1	0	0	0	BTG1	chr12:92539370-92539429
29033	1.40496	0.000958633	chr12	+	98987970	98987989	19	140	80	60	122	40	20	0	0	0	0	0	0	SLC25A3	chr12:98987970-98987989
29137	2.71429	4.92699e-05	chr12	+	110720010	110720069	59	158	102	141	12	25	0	0	2	0	0	0	0	ATP2A2	chr12:110720010-110720069
39894	2.02778	0.000694966	chr12	-	112607217	112607276	59	106	0	79	0	0	0	0	0	0	0	0	0	C12orf51	chr12:112607217-112607276
29180	1.37643	0.00087379	chr12	+	118464895	118464934	39	280	200	120	286	40	80	0	1	0	0	0	0	RFC5	chr12:118464895-118464934
29194	2.62222	4.92354e-07	chr12	+	120555267	120555326	59	53	171	60	0	0	0	1	1	0	0	0	0		chr12:120555267-120555326
39937	2.42222	0.000113117	chr12	-	120582646	120582705	59	54	161	41	0	0	0	0	0	0	0	0	0	GCN1L1	chr12:120582646-120582705
39944	2.12881	0.000421678	chr12	-	120599939	120600038	99	213	183	213	0	42	85	0	0	0	0	0	0	GCN1L1	chr12:120599939-120600038
39944	1.09808	0.000926093	chr12	-	120600919	120600938	19	225	182	100	214	112	134	1	0	0	0	0	0	GCN1L1	chr12:120600919-120600938
29208	2.03657	0.000144262	chr12	+	120972268	120972487	219	2530	3178	2084	1841	826	792	15	10	6	13	7	3	RNF10	chr12:120972268-120972487
29208	1.8012	0.000102423	chr12	+	120972768	120972847	79	640	459	444	238	181	334	2	1	2	0	0	2	RNF10	chr12:120972768-120972847
29240	1.48505	0.000394251	chr12	+	122213916	122213955	39	296	160	318	100	89	293	0	0	0	0	0	0	TMEM120B	chr12:122213916-122213955
29244	1.22222	0.000975559	chr12	+	122517074	122517093	19	153	133	105	40	58	211	0	0	0	0	0	0	MLXIP	chr12:122517074-122517093
29245	1.44167	0.000324348	chr12	+	122613803	122613822	19	198	87	174	176	77	47	0	0	0	0	0	0	MLXIP	chr12:122613803-122613822
29245	2.11784	0.000121934	chr12	+	122613963	122614222	259	1501	1712	1704	1051	551	319	10	6	11	5	2	3	MLXIP	chr12:122613963-122614222
29245	1.4752	0.000148968	chr12	+	122615443	122615542	99	1023	1271	882	1157	302	592	1	0	0	1	0	1	MLXIP	chr12:122615443-122615542
29246	2.10835	0.000324269	chr12	+	122617951	122618030	79	155	378	153	72	66	65	0	1	1	0	0	0	MLXIP	chr12:122617951-122618030
29247	2.21156	0.000263012	chr12	+	122619667	122619766	99	219	576	588	0	284	177	0	0	0	0	0	0	MLXIP	chr12:122619667-122619766
29247	2.77056	0.000114454	chr12	+	122620067	122620186	119	621	528	576	251	25	118	1	0	0	0	0	0	MLXIP	chr12:122620067-122620186
29249	2.53682	0.000124744	chr12	+	122622431	122622570	139	186	306	152	1	0	0	1	0	0	0	0	0	MLXIP	chr12:122622431-122622570
29249	1.625	0.000697164	chr12	+	122622671	122622710	39	121	158	182	120	120	0	0	0	1	0	0	0	MLXIP	chr12:122622671-122622710
29249	1.94157	0.00024382	chr12	+	122622811	122622870	59	163	220	297	77	119	69	1	0	0	0	0	0	MLXIP	chr12:122622811-122622870
29249	2	0.000264195	chr12	+	122622991	122623030	39	136	248	80	63	105	4	0	0	0	0	0	0	MLXIP	chr12:122622991-122623030
29273	2.57456	0.00025707	chr12	+	123340585	123340624	39	125	264	74	6	40	62	0	1	0	0	0	0	HIP1R	chr12:123340585-123340624
29273	2.00417	0.000841984	chr12	+	123340745	123340804	59	60	123	118	0	0	60	0	0	0	0	0	0	HIP1R	chr12:123340745-123340804
29274	1.66234	0.00047772	chr12	+	123341646	123341725	79	375	467	194	279	45	206	0	1	0	0	0	0	HIP1R	chr12:123341646-123341725
29274	2.59355	2.46103e-05	chr12	+	123342586	123342665	79	304	366	252	138	75	0	2	5	4	2	1	0	HIP1R	chr12:123342586-123342665
29274	2.81193	1.4628e-05	chr12	+	123343006	123343145	139	146	363	285	0	16	0	0	1	2	0	0	0	HIP1R	chr12:123343006-123343145
29274	2.32194	0.000325082	chr12	+	123343226	123343285	59	332	135	168	60	51	60	0	0	0	0	0	0	HIP1R	chr12:123343226-123343285
29275	3.86176	7.98801e-05	chr12	+	123343916	123344195	279	817	1702	939	36	26	212	0	1	0	0	0	0	HIP1R	chr12:123343916-123344195
29275	1.99115	0.000471744	chr12	+	123344936	123344995	59	147	178	166	70	89	0	0	0	1	0	0	0	HIP1R	chr12:123344936-123344995
29276	2.96816	1.92593e-05	chr12	+	123345477	123345596	119	433	444	336	0	118	56	0	1	2	0	0	0	HIP1R	chr12:123345477-123345596
29276	2.2533	0.000207343	chr12	+	123346057	123346196	139	477	691	277	157	145	111	1	2	0	0	0	0	HIP1R	chr12:123346057-123346196
29278	2.59144	0.000137834	chr12	+	123352193	123352272	79	156	80	190	17	0	0	0	0	0	0	0	0		chr12:123352193-123352272
29278	2.34859	0.000307378	chr12	+	123352373	123352452	79	131	212	80	44	0	0	0	1	0	0	0	0		chr12:123352373-123352452
29278	2.6	2.39313e-05	chr12	+	123352533	123352612	79	126	150	117	0	5	0	1	0	0	0	0	0		chr12:123352533-123352612
29281	1.41034	0.000497547	chr12	+	123718213	123718232	19	131	160	54	112	58	60	1	0	0	0	0	0	C12orf65	chr12:123718213-123718232
29281	1.48697	0.000167061	chr12	+	123718253	123718392	139	2138	1921	1045	1686	1083	522	2	0	1	3	0	0	C12orf65	chr12:123718253-123718392
29289	1.43599	0.00048933	chr12	+	124069377	124069396	19	120	120	115	169	20	40	0	0	0	0	0	0	TMED2	chr12:124069377-124069396
40027	1.29231	0.000413396	chr12	-	124809375	124809454	79	717	743	640	477	739	364	2	1	0	0	0	0	NCOR2	chr12:124809375-124809454
40027	1.52174	0.000562894	chr12	-	124809475	124809494	19	140	91	55	83	27	60	0	0	1	0	0	0	NCOR2	chr12:124809475-124809494
40027	2.40458	6.74227e-05	chr12	-	124809635	124809754	119	214	201	162	27	6	0	1	1	0	0	0	0	NCOR2	chr12:124809635-124809754
40027	2.1206	0.000384899	chr12	-	124809775	124809894	119	211	298	393	120	117	0	0	0	1	0	0	0	NCOR2	chr12:124809775-124809894
40028	1.90497	0.000358551	chr12	-	124856726	124856765	39	388	215	155	176	158	9	1	0	0	0	0	0	NCOR2	chr12:124856726-124856765
40028	2.28571	6.21185e-05	chr12	-	124856786	124856905	119	1330	1246	856	613	570	123	2	1	1	0	0	0	NCOR2	chr12:124856786-124856905
40028	3.04	5.15496e-05	chr12	-	124857006	124857125	119	338	635	567	232	33	0	0	0	0	0	0	0	NCOR2	chr12:124857006-124857125
29311	1.68333	0.000749884	chr12	+	125550858	125550937	79	80	0	80	0	0	0	1	0	0	0	0	0	AACS	chr12:125550858-125550937
29333	1.8227	0.000497411	chr12	+	133067589	133067648	59	239	232	120	173	10	60	0	0	0	0	0	0	FBRSL1	chr12:133067589-133067648
29333	2.62252	0.000134673	chr12	+	133067849	133067948	99	218	192	78	0	1	1	0	1	0	0	0	0	FBRSL1	chr12:133067849-133067948
40042	1.66247	0.000368098	chr12	-	133201124	133201163	39	259	157	120	165	97	15	0	0	1	0	0	0	POLE	chr12:133201124-133201163
40043	1.58761	0.000231516	chr12	-	133218842	133218921	79	695	374	631	279	480	224	0	1	1	0	1	0	POLE	chr12:133218842-133218921
5659	2.43889	0.000103803	chr13	-	31735178	31735237	59	112	147	0	0	0	0	0	0	0	0	0	0	HSPH1	chr13:31735178-31735237
5660	0.90588	0.000660383	chr13	-	31735783	31735842	59	1187	1760	1079	2486	1161	812	0	0	0	1	0	0	HSPH1	chr13:31735783-31735842
5779	1.25301	0.00035936	chr13	-	52026709	52026808	99	758	1211	940	1360	566	410	11	8	12	3	3	0	INTS6	chr13:52026709-52026808
5782	1.76667	0.000586311	chr13	-	52980526	52980585	59	60	18	60	0	0	0	0	0	0	0	0	0	THSD1	chr13:52980526-52980585
6114	2.88901	0.000103114	chr13	-	111365027	111365266	239	626	572	661	60	0	117	2	1	3	0	0	1		chr13:111365027-111365266
6114	2.66504	0.00015197	chr13	-	111365627	111365846	219	713	1031	866	188	179	203	1	0	1	0	0	0		chr13:111365627-111365846
6115	1.57398	0.000714399	chr13	-	111367159	111367198	39	215	158	120	120	80	72	0	0	1	0	0	0		chr13:111367159-111367198
6115	1.97955	0.000180231	chr13	-	111367279	111367438	159	1087	1260	1009	659	583	222	1	6	2	0	3	0		chr13:111367279-111367438
5581	1.09704	0.000457192	chr13	+	111477953	111478032	79	813	1553	751	1340	1011	472	1	0	2	1	1	0		chr13:111477953-111478032
6127	2.24574	0.000194949	chr13	-	113862485	113862604	119	1068	1039	418	382	273	271	2	0	1	0	1	0	PCID2	chr13:113862485-113862604
11024	2.30049	0.000413245	chr14	-	23536598	23536657	59	108	418	224	120	102	0	0	1	0	1	0	0	ACIN1	chr14:23536598-23536657
11130	1.38623	0.000572121	chr14	-	55368674	55368713	39	391	256	159	255	176	117	0	0	0	0	0	0	GCH1	chr14:55368674-55368713
11130	1.89583	0.000624328	chr14	-	55368994	55369033	39	121	80	134	120	0	0	0	0	0	0	0	0	GCH1	chr14:55368994-55369033
11148	2.1512	0.000726089	chr14	-	59950835	59950894	59	217	54	175	103	0	4	0	0	0	1	0	0	C14orf149	chr14:59950835-59950894
16620	1.9	0.000442384	chr14	+	70233597	70233656	59	60	102	0	0	0	0	0	0	0	0	0	0	SRSF5	chr14:70233597-70233656
11306	2.04795	0.000459786	chr14	-	99981404	99981463	59	180	178	60	0	31	81	0	0	0	0	0	0	CCDC85C	chr14:99981404-99981463
11322	1.74444	0.000664988	chr14	-	105473753	105473812	59	0	60	66	0	0	0	0	2	0	0	0	0		chr14:105473753-105473812
1886	2.35928	0.000545306	chr15	+	39873566	39873585	19	38	148	140	47	40	20	0	2	0	0	0	0	THBS1	chr15:39873566-39873585
1886	3.31389	0.000121454	chr15	+	39873686	39873805	119	228	528	73	0	0	0	1	0	0	0	0	0	THBS1	chr15:39873686-39873805
1912	2.07933	0.000107606	chr15	+	41221733	41221832	99	332	629	592	172	274	145	1	1	0	1	0	0	DLL4	chr15:41221733-41221832
1912	2.76164	1.09876e-05	chr15	+	41221933	41222032	99	674	717	263	260	149	0	0	1	0	0	0	0	DLL4	chr15:41221933-41222032
1912	3.93611	2.73203e-07	chr15	+	41222573	41222692	119	389	333	331	0	0	0	1	0	0	0	0	0	DLL4	chr15:41222573-41222692
1284	1.08382	0.000732033	chr15	-	48936840	48936879	39	383	536	254	398	514	161	0	0	0	0	0	0	FBN1	chr15:48936840-48936879
1458	2.54	3.58026e-06	chr15	-	70389652	70389751	99	177	149	128	0	0	0	1	0	1	0	0	0	TLE3	chr15:70389652-70389751
2084	1.49019	0.000251144	chr15	+	72766916	72767055	139	793	1385	1011	1021	601	384	6	1	2	3	0	2	ARIH1	chr15:72766916-72767055
1502	3.32847	4.61914e-06	chr15	-	75229837	75229936	99	294	488	278	11	100	0	1	1	0	0	0	0	COX5A	chr15:75229837-75229936
2106	1.95238	0.000481248	chr15	+	75746200	75746339	139	102	234	60	0	0	0	0	1	0	0	0	0		chr15:75746200-75746339
2130	1.5275	0.00088868	chr15	+	78858090	78858129	39	108	160	207	160	112	0	0	0	4	1	1	0	CHRNA5	chr15:78858090-78858129
2182	2	0.000492186	chr15	+	81294182	81294241	59	112	0	60	0	0	0	0	0	2	0	0	0	MESDC1	chr15:81294182-81294241
1560	1.85724	0.000166132	chr15	-	89455704	89455823	119	857	529	891	568	53	441	0	0	1	0	0	0	MFGE8	chr15:89455704-89455823
1560	1.35564	0.000400172	chr15	-	89455924	89456003	79	619	765	442	451	456	373	0	0	0	0	0	1	MFGE8	chr15:89455924-89456003
1560	1.77949	0.000230217	chr15	-	89456384	89456403	19	57	99	119	97	38	0	2	1	0	0	0	0	MFGE8	chr15:89456384-89456403
1563	2.15591	0.000347851	chr15	-	89876587	89876706	119	459	390	152	61	155	55	0	1	1	0	1	0	POLG	chr15:89876587-89876706
38474	2.34589	0.000157585	chr16	+	476744	476823	79	196	169	80	0	39	13	0	0	0	0	0	0	RAB11FIP3	chr16:476744-476823
38477	2.10849	0.000362705	chr16	+	722258	722337	79	267	180	207	129	0	55	0	0	0	0	0	0	RHOT2	chr16:722258-722337
38477	2.80376	0.000325998	chr16	+	722598	722697	99	389	90	256	70	0	2	1	0	1	0	0	0	RHOT2	chr16:722598-722697
38477	1.94994	0.000134411	chr16	+	723038	723117	79	363	594	400	400	172	7	0	0	0	0	0	0	RHOT2	chr16:723038-723117
38477	2.20677	0.000236254	chr16	+	723238	723317	79	121	92	130	3	10	13	0	0	1	0	0	0	RHOT2	chr16:723238-723317
38478	1.11677	0.000863048	chr16	+	730566	730605	39	270	374	441	282	323	354	0	0	0	0	0	0	STUB1	chr16:730566-730605
38479	1.02387	0.000781896	chr16	+	731222	731261	39	623	480	364	688	234	504	0	0	0	0	0	1	STUB1	chr16:731222-731261
38480	2.56022	0.000172345	chr16	+	736180	736279	99	173	245	196	0	57	0	0	0	0	0	0	0		chr16:736180-736279
38480	3.35915	0.00012921	chr16	+	736380	736519	139	94	526	379	0	6	0	0	1	2	0	0	0		chr16:736380-736519
38480	2.63765	9.64562e-05	chr16	+	737380	737499	119	204	165	388	65	0	0	1	0	0	0	0	0		chr16:737380-737499
2299	1.81481	0.000666428	chr16	-	836142	836181	39	171	75	120	106	4	40	1	0	0	0	0	0	RPUSD1	chr16:836142-836181
2299	2.16667	0.000107987	chr16	-	837262	837321	59	60	103	39	0	0	0	2	0	0	0	0	0	RPUSD1	chr16:837262-837321
38482	2.94972	0.000102398	chr16	+	838956	839095	139	778	970	444	274	0	201	1	6	0	0	0	0	CHTF18	chr16:838956-839095
38482	1.66961	0.000490484	chr16	+	839276	839335	59	335	179	231	198	120	60	2	2	1	1	1	0	CHTF18	chr16:839276-839335
38482	3.34449	4.249e-05	chr16	+	839536	839715	179	686	984	879	386	0	0	1	1	0	0	0	0	CHTF18	chr16:839536-839715
38483	1.68826	0.000592715	chr16	+	840632	840731	99	299	508	274	244	168	102	0	0	0	1	0	0	CHTF18	chr16:840632-840731
38483	1.64197	8.35332e-05	chr16	+	841212	841331	119	1105	1612	612	1384	390	120	0	2	1	0	0	0	CHTF18	chr16:841212-841331
38483	2.24079	0.000124543	chr16	+	841412	841551	139	327	933	685	371	56	212	0	0	2	0	0	0	CHTF18	chr16:841412-841551
38484	2.52507	8.24761e-05	chr16	+	846625	846724	99	182	243	131	38	1	0	0	0	0	0	0	0	CHTF18	chr16:846625-846724
38484	2.23622	0.000125791	chr16	+	847005	847084	79	248	359	285	188	0	80	0	1	0	0	0	0	CHTF18	chr16:847005-847084
38485	1.61965	0.000471589	chr16	+	847840	847879	39	152	214	153	83	194	0	1	0	0	0	0	0	CHTF18	chr16:847840-847879
38486	1.88235	0.000798099	chr16	+	1360119	1360178	59	96	12	60	0	0	7	1	0	0	0	0	0	UBE2I	chr16:1360119-1360178
2301	2.44631	0.000156867	chr16	-	1495602	1495681	79	184	195	110	14	0	44	0	0	0	0	0	0	CCDC154 CLCN7	chr16:1495602-1495681
2301	2.44646	0.000319923	chr16	-	1495842	1495961	119	475	531	119	121	109	17	0	0	0	0	0	0	CCDC154 CLCN7	chr16:1495842-1495961
38493	1.97582	1.64102e-05	chr16	+	1756538	1756657	119	1194	1363	1161	818	242	644	0	1	1	1	0	0	MAPK8IP3	chr16:1756538-1756657
38494	1.94669	0.000197871	chr16	+	1818503	1818582	79	357	346	396	399	55	0	1	2	0	0	0	0	MAPK8IP3	chr16:1818503-1818582
38494	2.27149	0.000282645	chr16	+	1819863	1819922	59	176	86	60	41	0	0	0	0	0	0	0	0	MAPK8IP3	chr16:1819863-1819922
38494	2.72414	4.07159e-05	chr16	+	1819943	1820002	59	109	170	94	11	12	0	0	0	0	0	0	0	MAPK8IP3	chr16:1819943-1820002
38496	1.95833	0.000719655	chr16	+	1836459	1836538	79	80	146	0	0	0	0	0	1	0	0	0	0	NUBP2	chr16:1836459-1836538
38498	2.10833	0.000306733	chr16	+	2009761	2009840	79	0	151	115	0	0	0	0	0	0	0	0	0	NDUFB10	chr16:2009761-2009840
2309	2.13667	0.000224601	chr16	-	2015086	2015185	99	156	125	60	0	0	0	0	0	0	0	0	0	RPS2	chr16:2015086-2015185
2310	1.96944	0.000671525	chr16	-	2052015	2052134	119	140	209	0	0	0	0	0	0	0	0	0	0	ZNF598	chr16:2052015-2052134
2310	2.055	0.000462758	chr16	-	2052295	2052334	39	75	143	73	40	40	0	0	0	0	0	0	0	ZNF598	chr16:2052295-2052334
2312	1.94304	0.000478077	chr16	-	2128844	2128923	79	218	336	123	17	217	0	1	0	0	0	0	0		chr16:2128844-2128923
2312	2.095	0.000342617	chr16	-	2129024	2129063	39	120	137	38	80	0	0	1	0	0	0	0	0		chr16:2129024-2129063
2312	2.34386	0.000445762	chr16	-	2129144	2129203	59	120	258	106	71	34	0	0	1	0	0	0	0		chr16:2129144-2129203
2312	2.9484	0.000178171	chr16	-	2129444	2129543	99	356	301	243	99	0	0	0	0	0	2	0	0		chr16:2129444-2129543
2312	2.45773	0.000113932	chr16	-	2129724	2129883	159	182	374	144	0	0	5	1	1	1	0	0	0		chr16:2129724-2129883
2312	2.59021	2.17236e-05	chr16	-	2129964	2130063	99	134	315	98	27	0	0	0	0	0	0	0	0		chr16:2129964-2130063
2313	3.33922	6.06875e-06	chr16	-	2131323	2131662	339	524	1024	830	0	0	0	2	0	0	0	0	0		chr16:2131323-2131662
2314	2.62083	3.51272e-05	chr16	-	2132441	2132500	59	122	213	114	0	60	0	0	0	0	0	0	0		chr16:2132441-2132500
2314	3.41562	0.000432487	chr16	-	2133141	2133220	79	144	548	157	59	21	0	0	1	0	0	0	0		chr16:2133141-2133220
2314	3.03659	0.000261366	chr16	-	2133241	2133320	79	55	338	114	6	0	0	0	0	0	0	0	0		chr16:2133241-2133320
2314	2.04792	0.000480255	chr16	-	2133361	2133620	259	237	411	192	0	13	0	0	1	0	0	0	0		chr16:2133361-2133620
2314	2.27347	0.0001983	chr16	-	2133681	2133740	59	118	120	135	42	23	0	0	1	0	0	0	0		chr16:2133681-2133740
2315	1.99535	0.000559234	chr16	-	2134999	2135038	39	120	111	78	0	55	40	0	0	0	0	0	0		chr16:2134999-2135038
2315	2.21259	0.000221677	chr16	-	2135099	2135398	299	358	434	452	69	0	0	0	0	0	0	0	0		chr16:2135099-2135398
2315	3.71395	3.36358e-05	chr16	-	2136039	2136178	139	600	336	225	10	0	0	2	2	0	0	0	0		chr16:2136039-2136178
2315	2.61667	6.68551e-06	chr16	-	2136299	2136358	59	52	121	118	0	0	0	0	0	0	0	0	0		chr16:2136299-2136358
2316	2.40784	9.38997e-05	chr16	-	2136718	2136797	79	76	157	137	15	0	0	0	0	1	0	0	0	PKD1	chr16:2136718-2136797
2316	2.40678	0.000188083	chr16	-	2136978	2137177	199	348	371	377	38	0	70	1	1	0	0	0	0	PKD1	chr16:2136978-2137177
2316	2.62973	6.12389e-05	chr16	-	2137238	2137357	119	216	109	280	10	0	0	0	2	0	0	0	0	PKD1	chr16:2137238-2137357
2316	2.44896	8.14814e-05	chr16	-	2137558	2137877	319	490	363	538	0	0	0	0	0	0	0	0	0	PKD1	chr16:2137558-2137877
2317	2.6701	0.000173318	chr16	-	2139721	2139800	79	212	134	183	28	23	0	2	0	0	0	0	0	PKD1 MIR1225	chr16:2139721-2139800
2317	3.17491	5.53041e-05	chr16	-	2139961	2140420	459	1775	1998	1626	339	202	223	5	1	1	0	0	0	PKD1 MIR1225	chr16:2139961-2140420
2317	2	0.000275638	chr16	-	2140661	2140720	59	70	110	0	0	0	0	0	0	0	0	0	0	PKD1 MIR1225	chr16:2140661-2140720
2317	2.12778	0.000317446	chr16	-	2140741	2140800	59	24	123	56	0	0	0	0	0	0	0	0	0	PKD1 MIR1225	chr16:2140741-2140800
2317	2.1375	0.000270231	chr16	-	2140821	2140900	79	0	131	138	0	0	0	0	1	0	0	0	0	PKD1 MIR1225	chr16:2140821-2140900
2318	2.29494	0.000253734	chr16	-	2141847	2142106	259	350	702	296	149	0	0	1	0	0	0	0	0	PKD1 MIR1225	chr16:2141847-2142106
2318	2.80952	3.92949e-05	chr16	-	2142447	2142506	59	95	227	84	0	30	0	0	1	0	0	0	0	PKD1	chr16:2142447-2142506
2318	3.97273	8.17508e-05	chr16	-	2142827	2143046	219	594	760	600	0	0	0	1	0	1	0	0	0	PKD1	chr16:2142827-2143046
2319	1.97823	0.000203347	chr16	-	2150425	2150524	99	318	473	454	0	190	291	0	0	0	0	0	0	PKD1	chr16:2150425-2150524
2319	2.42886	0.00017464	chr16	-	2150545	2150704	159	246	206	255	0	0	12	1	0	1	0	0	0	PKD1	chr16:2150545-2150704
2320	2.9625	0.000108071	chr16	-	2155256	2155335	79	184	120	167	0	0	0	0	0	0	0	0	0	PKD1	chr16:2155256-2155335
2320	2.73054	1.58667e-05	chr16	-	2155376	2155415	39	98	162	76	9	38	0	0	0	0	0	0	0	PKD1	chr16:2155376-2155415
2320	2.76284	0.000181657	chr16	-	2155536	2155635	99	254	302	270	21	14	74	0	1	0	0	0	0	PKD1	chr16:2155536-2155635
2320	3.094	3.55938e-05	chr16	-	2155756	2156015	259	688	944	666	0	91	125	2	0	2	0	1	0	PKD1	chr16:2155756-2156015
2320	1.92857	0.000545806	chr16	-	2156236	2156315	79	51	79	116	12	0	0	0	0	0	0	0	0	PKD1	chr16:2156236-2156315
2320	2.21321	0.000332855	chr16	-	2156376	2156555	179	372	275	283	126	0	0	1	0	0	0	0	0	PKD1	chr16:2156376-2156555
2321	2.4269	0.000203731	chr16	-	2158409	2158548	139	414	603	199	10	82	168	2	3	1	0	0	1	PKD1	chr16:2158409-2158548
2321	3.57883	3.42586e-06	chr16	-	2158669	2158788	119	492	446	275	6	0	78	1	3	0	0	0	0	PKD1	chr16:2158669-2158788
2321	2.77492	2.04049e-05	chr16	-	2159429	2159528	99	150	309	100	11	0	0	0	1	0	0	0	0	PKD1	chr16:2159429-2159528
2321	2.82211	0.000195578	chr16	-	2159969	2160188	219	505	786	270	126	0	1	0	0	0	0	0	0	PKD1	chr16:2159969-2160188
2321	3.22313	2.76692e-05	chr16	-	2160929	2161168	239	1168	704	968	379	0	0	1	1	0	2	0	0	PKD1	chr16:2160929-2161168
2321	5.56046	8.79019e-05	chr16	-	2161369	2161528	159	1197	1120	598	132	0	0	1	1	0	0	0	0	PKD1	chr16:2161369-2161528
2321	2.08889	0.000656101	chr16	-	2161669	2161728	59	185	60	131	30	60	0	1	1	0	0	0	0	PKD1	chr16:2161669-2161728
2321	2.30667	5.06784e-06	chr16	-	2161869	2161968	99	100	102	186	0	0	0	0	0	1	0	0	0	PKD1	chr16:2161869-2161968
2322	3.2708	0.000110277	chr16	-	2167007	2167146	139	642	405	373	145	0	0	2	0	0	0	0	0	PKD1	chr16:2167007-2167146
2322	2.51042	0.00037052	chr16	-	2167167	2167326	159	423	183	119	0	0	0	0	0	0	0	0	0	PKD1	chr16:2167167-2167326
2322	2.5625	0.000309526	chr16	-	2167447	2167506	59	227	60	107	44	0	0	0	0	0	0	0	0	PKD1	chr16:2167447-2167506
2325	2.7092	1.00468e-05	chr16	-	2273863	2273962	99	137	190	282	0	37	0	0	1	0	0	0	0		chr16:2273863-2273962
2325	2.23404	0.000212294	chr16	-	2274103	2274202	99	211	265	270	81	0	85	1	0	0	0	0	1		chr16:2274103-2274202
2327	1.44024	0.000705211	chr16	-	2278116	2278155	39	124	269	210	154	108	120	0	0	0	0	0	0		chr16:2278116-2278155
2327	2.20465	8.13865e-05	chr16	-	2278436	2278555	119	459	756	414	351	0	193	1	0	0	0	0	0		chr16:2278436-2278555
2327	2.4125	0.000425439	chr16	-	2278656	2278735	79	145	262	125	0	80	0	0	0	0	0	0	0		chr16:2278656-2278735
2327	2.0529	0.000190896	chr16	-	2278816	2278895	79	342	377	244	266	0	80	0	0	0	0	0	0		chr16:2278816-2278895
2327	2.86801	0.000130911	chr16	-	2279096	2279215	119	509	509	469	0	37	247	0	0	0	0	0	0		chr16:2279096-2279215
2327	2.16667	0.000250993	chr16	-	2280616	2280675	59	0	118	92	0	0	0	0	0	0	0	0	0		chr16:2280616-2280675
2327	2.64209	0.000357902	chr16	-	2280716	2280895	179	106	509	557	0	53	58	0	2	0	0	0	0		chr16:2280716-2280895
2327	2.78412	0.000353424	chr16	-	2281176	2281235	59	101	459	382	41	122	60	0	0	0	0	0	0		chr16:2281176-2281235
2327	2.78983	3.36922e-05	chr16	-	2282036	2282175	139	929	773	1162	459	170	123	0	1	1	0	1	1		chr16:2282036-2282175
2327	2.74419	5.80201e-05	chr16	-	2282196	2282315	119	738	364	524	329	11	31	1	0	4	0	0	0		chr16:2282196-2282315
2327	3.21996	1.18154e-05	chr16	-	2282736	2282835	99	373	615	289	108	9	70	1	0	0	1	0	0		chr16:2282736-2282835
2327	2.3358	0.000177456	chr16	-	2283176	2283255	79	247	318	137	28	0	137	1	0	0	0	0	0		chr16:2283176-2283255
2327	2.14706	0.00027673	chr16	-	2283396	2283435	39	130	108	80	84	0	0	0	0	0	0	0	0		chr16:2283396-2283435
2327	2.20646	0.000151646	chr16	-	2284456	2284555	99	437	324	462	112	296	0	2	8	2	0	1	0		chr16:2284456-2284555
2328	2.21074	0.000296167	chr16	-	2285171	2285230	59	120	107	120	2	60	0	1	0	1	0	0	0		chr16:2285171-2285230
2328	2.48257	6.28262e-05	chr16	-	2285371	2285470	99	90	283	245	73	0	0	0	0	2	0	0	0		chr16:2285371-2285470
2328	2.1362	0.000487227	chr16	-	2285631	2285670	39	240	120	112	52	80	27	1	0	0	0	0	0		chr16:2285631-2285670
2329	2.11333	2.92248e-05	chr16	-	2288200	2288299	99	99	147	88	0	0	0	0	0	0	0	0	0	ECI1	chr16:2288200-2288299
2331	2.22436	8.89252e-05	chr16	-	2296450	2296529	79	577	289	278	224	160	0	0	1	0	0	0	0	ECI1	chr16:2296450-2296529
2332	1.5264	0.000577526	chr16	-	2303962	2304021	59	294	409	121	235	79	161	0	1	1	2	0	0	RNPS1	chr16:2303962-2304021
38504	1.78523	0.00057251	chr16	+	2510868	2510907	39	161	114	137	98	80	0	0	0	0	0	0	0	C16orf59	chr16:2510868-2510907
38504	1.60748	0.000424174	chr16	+	2511008	2511027	19	130	94	60	94	40	20	0	0	0	0	0	0	C16orf59	chr16:2511008-2511027
38504	1.83468	0.000725439	chr16	+	2511048	2511087	39	155	88	92	116	5	7	0	0	0	0	0	0	C16orf59	chr16:2511048-2511087
38513	2.08782	0.000608347	chr16	+	2817480	2817519	39	315	156	142	156	2	75	1	0	0	0	0	0	SRRM2	chr16:2817480-2817519
38513	1.7037	0.000490878	chr16	+	2817760	2817779	19	40	107	111	60	9	60	0	0	1	0	0	0	SRRM2	chr16:2817760-2817779
38513	1.54545	0.000531618	chr16	+	2817820	2817839	19	64	140	72	80	20	60	0	0	1	0	0	0	SRRM2	chr16:2817820-2817839
38536	1.15812	0.000715461	chr16	+	9185756	9185775	19	182	220	80	204	100	104	0	0	0	0	0	0	C16orf72	chr16:9185756-9185775
38543	2.74689	2.83975e-05	chr16	+	11272299	11272378	79	201	174	47	0	0	1	0	0	0	0	0	0	CLEC16A	chr16:11272299-11272378
2377	2.06298	0.000329882	chr16	-	11348706	11348785	79	144	332	357	142	138	0	1	0	1	0	1	0	SOCS1	chr16:11348706-11348785
2377	2.44062	8.4424e-05	chr16	-	11349086	11349165	79	212	89	224	80	0	0	1	1	2	0	0	0	SOCS1	chr16:11349086-11349165
2378	2.93155	7.30271e-05	chr16	-	11349320	11349479	159	833	717	691	64	240	151	2	1	2	0	0	0	SOCS1	chr16:11349320-11349479
2378	2.31864	0.00019224	chr16	-	11349500	11349679	179	723	769	926	532	181	28	1	3	6	2	1	0	SOCS1	chr16:11349500-11349679
2397	5.77906	2.75731e-11	chr16	-	14580875	14580974	99	4519	3690	3399	1048	373	348	6	9	3	1	0	0	PARN	chr16:14580875-14580974
2440	3.88389	2.30881e-05	chr16	-	18937272	18937591	319	1767	2433	1328	585	0	143	5	10	2	0	0	0	SMG1	chr16:18937272-18937591
2457	1.54185	0.000610342	chr16	-	21513119	21513138	19	135	115	40	67	38	58	0	0	0	1	0	0	LOC100271836	chr16:21513119-21513138
2457	1.5969	0.000801037	chr16	-	21513179	21513198	19	179	113	60	78	40	80	0	0	0	0	0	0	LOC100271836	chr16:21513179-21513198
2457	1.45629	0.000489916	chr16	-	21513219	21513278	59	303	453	276	355	95	201	0	1	0	0	0	1	LOC100271836	chr16:21513219-21513278
2457	2.09845	0.00021046	chr16	-	21513359	21513518	159	1661	1846	669	727	602	434	8	7	4	3	0	0	LOC100271836	chr16:21513359-21513518
2457	2.04583	0.000311016	chr16	-	21513699	21513778	79	0	135	108	0	0	0	0	0	2	0	0	0	LOC100271836	chr16:21513699-21513778
2461	1.41803	0.000193052	chr16	-	21531110	21531229	119	1282	1776	813	992	920	703	3	0	1	4	1	0	SLC7A5P2	chr16:21531110-21531229
2461	1.07484	0.00051491	chr16	-	21531270	21531349	79	1006	1261	741	1422	490	869	1	2	0	2	1	0	SLC7A5P2	chr16:21531270-21531349
2461	1.55282	5.09764e-05	chr16	-	21531390	21531709	319	8771	8335	5987	8672	2964	2916	9	9	3	6	0	2	SLC7A5P2	chr16:21531390-21531709
38617	1.35089	0.000549691	chr16	+	28844438	28844497	59	344	432	472	387	253	243	0	0	2	0	0	0	ATXN2L	chr16:28844438-28844497
38617	1.11243	0.000939161	chr16	+	28844518	28844537	19	100	214	186	140	140	167	1	0	0	0	0	0	ATXN2L	chr16:28844518-28844537
2496	1.04903	0.000722141	chr16	-	29624587	29624606	19	153	322	171	280	227	106	0	0	0	0	0	0	SLC7A5P1	chr16:29624587-29624606
2496	1.26674	0.000216539	chr16	-	29624787	29624986	199	3890	4136	3227	4920	2608	1247	2	6	4	3	2	0	SLC7A5P1	chr16:29624787-29624986
38647	2.33333	0.000180163	chr16	+	30197860	30197919	59	146	82	60	24	0	0	0	2	0	0	0	0	CORO1A	chr16:30197860-30197919
2502	2.43889	0.000269498	chr16	-	30381175	30381294	119	215	19	276	0	0	0	1	0	1	0	0	0	TBC1D10B	chr16:30381175-30381294
38663	1.0752	0.000410462	chr16	+	31195227	31195326	99	1801	1594	1639	2087	1539	1005	3	4	0	9	3	2	FUS	chr16:31195227-31195326
38663	1.48897	7.8406e-05	chr16	+	31195567	31195686	119	2535	2509	2609	1806	1427	1798	2	2	1	1	0	0	FUS	chr16:31195567-31195686
38664	1.99499	0.000219612	chr16	+	31201377	31201456	79	514	454	378	0	73	486	0	1	1	0	0	0	FUS	chr16:31201377-31201456
38664	2.19372	0.000351001	chr16	+	31202077	31202136	59	713	262	445	157	283	113	1	1	0	0	0	0	FUS	chr16:31202077-31202136
38665	1.38138	0.00052452	chr16	+	31205026	31205045	19	140	91	169	83	81	109	0	0	0	0	0	0	FUS	chr16:31205026-31205045
38669	1.91092	0.000643911	chr16	+	31213438	31213497	59	199	112	174	99	3	66	0	0	0	0	0	0		chr16:31213438-31213497
38669	3.21243	0.00010734	chr16	+	31213798	31213997	199	582	561	468	84	0	8	1	0	2	0	0	0		chr16:31213798-31213997
38669	3.765	2.92949e-06	chr16	+	31214018	31214177	159	561	529	653	0	112	0	1	4	4	0	2	0		chr16:31214018-31214177
38669	2.03155	0.000114193	chr16	+	31214318	31214477	159	996	1115	802	310	546	340	2	0	3	1	0	0		chr16:31214318-31214477
38671	2.80711	0.00013651	chr16	+	31225837	31225896	59	120	94	155	17	0	0	0	0	1	0	0	0	TRIM72	chr16:31225837-31225896
38672	3.92079	0.000109472	chr16	+	31226211	31226370	159	460	551	489	25	0	0	0	0	0	0	0	0	TRIM72	chr16:31226211-31226370
38672	2.20134	0.000158239	chr16	+	31226431	31226510	79	348	235	153	207	0	0	0	2	0	0	0	0	TRIM72	chr16:31226431-31226510
38672	2.54514	0.000528138	chr16	+	31226931	31226990	59	283	206	60	14	0	94	1	0	0	0	0	0	TRIM72	chr16:31226931-31226990
38673	2.28342	0.000137123	chr16	+	31227487	31227546	59	60	53	134	0	7	0	0	0	0	0	0	0	TRIM72	chr16:31227487-31227546
38674	3.26877	0.000143975	chr16	+	31234278	31234377	99	345	433	252	57	0	56	1	4	0	0	0	0	TRIM72	chr16:31234278-31234377
38675	3.51097	1.32229e-05	chr16	+	31235318	31235717	399	2432	3382	2702	447	817	309	2	7	3	2	0	0	TRIM72	chr16:31235318-31235717
38675	4.7296	8.71477e-06	chr16	+	31235798	31236117	319	1972	1853	1839	163	286	0	2	5	3	0	0	0	TRIM72	chr16:31235798-31236117
38676	1.26287	0.000766722	chr16	+	31238331	31238370	39	257	310	217	160	239	200	0	1	0	0	0	0	TRIM72	chr16:31238331-31238370
38677	2.2132	0.000310205	chr16	+	31240213	31240272	59	95	115	42	0	17	0	0	0	1	0	0	0		chr16:31240213-31240272
38681	7.26779	2.10749e-08	chr16	+	33950102	33950221	119	2521	2437	2252	215	366	115	13	18	17	1	2	0		chr16:33950102-33950221
38681	2.7514	1.93458e-05	chr16	+	33950342	33950421	79	176	310	191	0	36	74	5	7	5	0	0	2		chr16:33950342-33950421
38683	2.51675	2.10086e-06	chr16	+	33956419	33956498	79	907	1255	690	310	579	118	26	29	17	8	13	3		chr16:33956419-33956498
2514	2.607	7.98839e-05	chr16	-	33957218	33957297	79	366	232	365	0	172	62	5	4	7	0	2	1		chr16:33957218-33957297
38684	2.73802	5.76486e-05	chr16	+	33958769	33958888	119	1411	1285	1232	553	591	87	7	9	12	2	2	0		chr16:33958769-33958888
2515	1.2152	0.000241498	chr16	-	33959206	33959305	99	2885	2331	1334	2300	1926	1108	58	48	28	48	40	23	LINC00273	chr16:33959206-33959305
38686	2.63288	7.26571e-06	chr16	+	33961234	33961333	99	1259	1267	1266	773	181	328	16	11	15	5	2	2		chr16:33961234-33961333
38689	8.1982	1.90646e-08	chr16	+	33964482	33964541	59	1265	1053	870	135	101	0	27	23	18	4	3	0		chr16:33964482-33964541
38691	1.95014	3.05263e-06	chr16	+	33965428	33965647	219	10673	11092	9124	5513	4121	5957	276	276	215	135	90	150		chr16:33965428-33965647
38711	2	0.000579954	chr16	+	50188183	50188242	59	60	120	0	0	0	0	0	0	0	0	0	0	PAPD5	chr16:50188183-50188242
38741	2.28762	0.000107438	chr16	+	56966244	56966543	299	1707	2078	1049	891	171	567	2	16	4	1	0	3	HERPUD1	chr16:56966244-56966543
38741	1.16063	0.000856545	chr16	+	56966644	56966663	19	185	188	80	74	100	208	0	0	0	0	0	0	HERPUD1	chr16:56966644-56966663
38741	1.6279	0.000187568	chr16	+	56966724	56966903	179	2477	2367	1531	2123	876	714	4	1	2	1	2	0	HERPUD1	chr16:56966724-56966903
38747	1.39841	0.000986759	chr16	+	57059386	57059405	19	80	80	131	80	71	40	0	0	0	0	0	0	NLRC5	chr16:57059386-57059405
38747	2.18868	6.91422e-05	chr16	+	57059446	57059525	79	299	402	327	89	100	154	0	1	1	0	0	0	NLRC5	chr16:57059446-57059525
38747	2.18087	5.46266e-05	chr16	+	57060726	57060805	79	428	526	257	192	105	132	0	1	1	0	0	0	NLRC5	chr16:57060726-57060805
38748	3.02823	2.95698e-06	chr16	+	57116369	57116448	79	569	433	236	159	0	97	3	2	1	0	0	0	NLRC5	chr16:57116369-57116448
38778	1.31111	0.000747122	chr16	+	67911282	67911301	19	113	156	80	124	99	32	1	0	0	0	0	0	EDC4	chr16:67911282-67911301
38779	1.70778	0.000367136	chr16	+	67911612	67911691	79	511	463	311	491	48	117	0	0	3	1	0	0	EDC4	chr16:67911612-67911691
38780	1.49051	0.000294606	chr16	+	67913589	67913628	39	554	742	222	547	240	200	2	1	0	0	0	0	EDC4	chr16:67913589-67913628
38783	2.22071	0.000106766	chr16	+	67917788	67917847	59	172	270	185	114	13	60	1	1	0	0	0	0	NRN1L EDC4	chr16:67917788-67917847
2628	2.21854	0.000239468	chr16	-	69363635	69363714	79	128	215	79	0	0	62	1	1	0	0	0	0	COG8 PDF	chr16:69363635-69363714
38824	2.12222	0.000251205	chr16	+	69973774	69973833	59	111	0	91	0	0	0	0	0	0	0	0	0	WWP2	chr16:69973774-69973833
2676	1.152	0.0007294	chr16	-	74955864	74955903	39	313	371	336	527	171	182	0	3	0	0	0	0	WDR59	chr16:74955864-74955903
2711	1.47244	0.000729625	chr16	-	85697606	85697625	19	160	94	60	74	60	60	0	0	0	0	0	0		chr16:85697606-85697625
2711	1.74839	0.000583256	chr16	-	85698506	85698545	39	142	160	120	80	109	1	0	0	0	0	0	0		chr16:85698506-85698545
2711	1.45	0.000993093	chr16	-	85698966	85698985	19	119	80	60	60	20	80	0	0	0	0	0	0		chr16:85698966-85698985
2712	2.28889	0.000113046	chr16	-	85701937	85701996	59	112	120	0	0	0	0	0	0	0	0	0	0		chr16:85701937-85701996
2718	1.96667	0.000564898	chr16	-	85722240	85722279	39	156	106	86	80	0	40	1	0	0	0	0	0	GINS2	chr16:85722240-85722279
2721	1.95333	0.000346766	chr16	-	87720980	87721079	99	76	148	62	0	0	0	0	0	0	0	0	0		chr16:87720980-87721079
2721	2.22814	0.000335907	chr16	-	87721140	87721219	79	112	204	30	0	23	0	0	0	0	0	0	0		chr16:87721140-87721219
2721	1.93561	0.000375544	chr16	-	87721980	87722099	119	472	315	322	243	124	34	1	0	0	0	0	0		chr16:87721980-87722099
2721	2.4875	0.000130052	chr16	-	87722320	87722399	79	206	3	148	0	0	0	0	0	0	0	0	0		chr16:87722320-87722399
2721	2.00325	0.000819704	chr16	-	87722840	87722919	79	144	160	69	0	68	0	1	0	0	0	0	0		chr16:87722840-87722919
2721	2.1	0.000501767	chr16	-	87723260	87723339	79	100	160	0	0	0	0	0	1	0	0	0	0		chr16:87723260-87723339
2722	1.91429	0.000372546	chr16	-	87724072	87724111	39	186	80	150	40	80	40	0	0	0	0	0	0		chr16:87724072-87724111
2722	3.08247	0.000130753	chr16	-	87724552	87724671	119	225	430	173	28	0	0	0	2	0	0	0	0		chr16:87724552-87724671
2724	2.56389	8.24629e-05	chr16	-	87735991	87736110	119	264	268	19	0	0	0	0	3	0	0	0	0		chr16:87735991-87736110
2724	2.29714	0.00012283	chr16	-	87736931	87737030	99	270	407	213	44	100	81	0	3	1	0	0	0		chr16:87736931-87737030
2726	1.80727	0.000641312	chr16	-	87742763	87742802	39	142	118	117	80	75	0	0	0	0	0	0	0	KLHDC4	chr16:87742763-87742802
2726	2.01695	0.000315667	chr16	-	87742923	87742962	39	109	162	81	116	0	0	0	0	1	0	0	0	KLHDC4	chr16:87742923-87742962
2726	1.40123	0.000966336	chr16	-	87743063	87743102	39	205	195	153	178	120	68	1	0	1	0	0	0	KLHDC4	chr16:87743063-87743102
2726	2.4	0.000195291	chr16	-	87744363	87744402	39	69	155	40	40	0	0	0	0	0	0	0	0	KLHDC4	chr16:87744363-87744402
2726	2.59021	0.000196038	chr16	-	87744503	87744622	119	241	577	516	0	294	0	0	0	0	0	0	0	KLHDC4	chr16:87744503-87744622
2734	1.72222	0.000413667	chr16	-	87864124	87864223	99	450	601	373	217	274	217	0	2	1	0	0	0	SLC7A5	chr16:87864124-87864223
2734	1.15455	0.000970587	chr16	-	87864404	87864423	19	200	120	120	220	140	20	0	2	0	0	0	0	SLC7A5	chr16:87864404-87864423
2734	1.5405	0.000636055	chr16	-	87864564	87864623	59	373	234	190	351	111	0	0	2	1	0	0	0	SLC7A5	chr16:87864564-87864623
2734	2.50721	3.03699e-05	chr16	-	87865284	87865343	59	324	411	120	5	51	180	2	0	0	0	0	0	SLC7A5	chr16:87865284-87865343
2734	1.30048	0.000952355	chr16	-	87866164	87866183	19	117	137	227	40	211	101	0	0	0	0	1	0	SLC7A5	chr16:87866164-87866183
2736	1.7557	0.000365068	chr16	-	87867773	87867832	59	272	358	268	0	172	262	0	0	0	0	0	0	SLC7A5	chr16:87867773-87867832
2737	2.58837	0.000100206	chr16	-	87872326	87872565	239	722	1249	732	564	40	0	1	0	0	0	0	0	SLC7A5	chr16:87872326-87872565
2737	2.41	0.000209617	chr16	-	87872686	87872765	79	328	155	237	80	80	0	0	0	1	0	0	0	SLC7A5	chr16:87872686-87872765
2737	2.24523	0.000195108	chr16	-	87872786	87872905	119	194	93	173	0	7	0	1	0	0	0	0	0	SLC7A5	chr16:87872786-87872905
2737	2.66505	0.000139202	chr16	-	87873226	87873325	99	205	335	254	100	12	0	0	0	1	0	0	0	SLC7A5	chr16:87873226-87873325
2739	2.50732	8.09858e-05	chr16	-	87877401	87877460	59	180	60	86	25	0	0	2	0	0	0	0	0	SLC7A5	chr16:87877401-87877460
2739	2.24318	0.000158224	chr16	-	87878861	87878980	119	595	640	296	320	36	123	0	0	0	1	0	0	SLC7A5	chr16:87878861-87878980
2740	1.80612	0.00031601	chr16	-	87882763	87882842	79	307	428	244	68	301	61	0	3	2	0	4	0	SLC7A5	chr16:87882763-87882842
2740	2.69855	9.59534e-05	chr16	-	87883923	87884002	79	161	378	148	105	0	0	0	1	0	0	0	0	SLC7A5	chr16:87883923-87884002
2740	1.4599	0.000201694	chr16	-	87884903	87884982	79	964	559	832	381	513	645	1	0	1	0	1	0	SLC7A5	chr16:87884903-87884982
2740	1.73935	4.37138e-05	chr16	-	87885103	87885202	99	948	1340	870	1140	355	188	1	0	2	3	0	0	SLC7A5	chr16:87885103-87885202
2740	1.96885	0.000256928	chr16	-	87885263	87885442	179	1087	1020	556	720	186	187	3	0	2	1	0	0	SLC7A5	chr16:87885263-87885442
2741	1.75516	0.000151278	chr16	-	87889563	87889642	79	505	653	371	596	181	0	1	3	0	0	0	0	SLC7A5	chr16:87889563-87889642
2741	2.03333	0.000259566	chr16	-	87889963	87890102	139	141	221	68	0	0	0	1	0	0	0	0	0	SLC7A5	chr16:87889963-87890102
2742	2.28	0.000363927	chr16	-	87891776	87891855	79	173	313	129	72	50	13	0	0	0	0	0	0	SLC7A5	chr16:87891776-87891855
2742	3.133	1.87681e-06	chr16	-	87892256	87892335	79	752	490	371	274	0	80	1	0	1	0	0	0	SLC7A5	chr16:87892256-87892335
2743	2.36535	0.000317388	chr16	-	87894323	87894442	119	280	513	333	101	0	174	0	2	2	0	0	0	SLC7A5	chr16:87894323-87894442
2743	2.0688	0.000424245	chr16	-	87894603	87894682	79	247	232	107	87	80	0	4	0	0	0	0	0	SLC7A5	chr16:87894603-87894682
2743	3.29744	8.91751e-06	chr16	-	87894843	87894962	119	292	365	265	0	12	18	1	0	0	0	0	0	SLC7A5	chr16:87894843-87894962
2745	1.03306	0.000728197	chr16	-	87902451	87902490	39	475	584	344	613	324	417	1	0	1	1	0	1	SLC7A5	chr16:87902451-87902490
2745	1.27368	0.000309044	chr16	-	87902611	87902710	99	1321	1336	1042	1144	803	895	0	1	1	0	0	1	SLC7A5	chr16:87902611-87902710
2745	1.21438	0.000221521	chr16	-	87902831	87903030	199	5124	4034	3387	5687	2284	2249	5	2	5	8	2	1	SLC7A5	chr16:87902831-87903030
2748	2.08	0.000483486	chr16	-	88799415	88799474	59	163	165	116	60	60	0	0	0	0	0	0	0	PIEZO1	chr16:88799415-88799474
2748	2.39003	0.000203722	chr16	-	88799515	88799634	119	413	370	248	126	6	90	0	0	0	0	0	0	PIEZO1	chr16:88799515-88799634
2748	2.90217	0.000316654	chr16	-	88799795	88799854	59	0	166	184	4	0	0	0	0	1	0	0	0	PIEZO1	chr16:88799795-88799854
2749	2.26	0.000131676	chr16	-	88805192	88805291	99	138	198	155	50	0	0	0	0	0	0	0	0	PIEZO1	chr16:88805192-88805291
2749	2.115	0.00038034	chr16	-	88805372	88805411	39	150	113	40	40	40	0	0	0	0	0	0	0	PIEZO1	chr16:88805372-88805411
2750	2.23657	0.000146355	chr16	-	88807818	88807937	119	681	591	325	417	98	0	0	0	0	0	0	0	PIEZO1	chr16:88807818-88807937
2753	2.0375	0.000608556	chr16	-	88905574	88905653	79	105	136	0	0	0	0	0	2	0	0	0	0	GALNS	chr16:88905574-88905653
2753	2.4119	4.23053e-05	chr16	-	88905874	88906013	139	173	323	93	0	0	0	0	0	1	0	0	0	GALNS	chr16:88905874-88906013
2753	2.00833	6.12817e-05	chr16	-	88906074	88906153	79	90	80	72	0	0	0	0	0	0	0	0	0	GALNS	chr16:88906074-88906153
2753	2.1875	0.00012317	chr16	-	88907294	88907373	79	59	146	80	0	0	0	0	0	0	0	0	0	GALNS	chr16:88907294-88907373
2754	4.47857	1.9977e-05	chr16	-	89343499	89343618	119	339	737	1064	200	0	0	1	1	0	0	0	0	ANKRD11	chr16:89343499-89343618
2754	2.08602	0.000735921	chr16	-	89343919	89343958	39	139	51	70	40	15	11	0	1	1	0	0	0	ANKRD11	chr16:89343919-89343958
2754	2.11387	0.000215157	chr16	-	89343979	89344058	79	280	178	323	100	124	19	0	0	0	0	0	0	ANKRD11	chr16:89343979-89344058
2754	3.22941	2.45207e-05	chr16	-	89344379	89344538	159	415	124	600	30	0	0	4	0	3	0	0	0	ANKRD11	chr16:89344379-89344538
2755	2.99441	1.54722e-05	chr16	-	89345039	89345138	99	254	288	222	0	0	58	2	0	0	0	0	0	ANKRD11	chr16:89345039-89345138
2755	2.52092	0.000156063	chr16	-	89345179	89345378	199	480	364	295	24	0	69	1	0	1	0	0	0	ANKRD11	chr16:89345179-89345378
2755	2.22765	0.000215691	chr16	-	89345399	89345538	139	375	492	296	106	68	122	1	0	2	0	0	0	ANKRD11	chr16:89345399-89345538
2756	2.75113	6.16122e-05	chr16	-	89346117	89346236	119	260	193	395	82	0	0	1	0	1	0	0	0	ANKRD11	chr16:89346117-89346236
2756	1.97143	0.000302575	chr16	-	89346517	89346576	59	278	160	210	120	60	60	0	0	0	0	0	0	ANKRD11	chr16:89346517-89346576
2756	3.30814	5.00373e-05	chr16	-	89346737	89347116	379	1173	959	648	32	19	0	4	1	0	0	0	0	ANKRD11	chr16:89346737-89347116
2756	2.10036	0.000227257	chr16	-	89347277	89347396	119	533	379	486	209	186	82	0	0	0	0	0	0	ANKRD11	chr16:89347277-89347396
2756	2.04478	0.000518764	chr16	-	89347557	89347596	39	84	87	120	54	0	27	0	0	0	0	0	0	ANKRD11	chr16:89347557-89347596
2756	1.85269	0.000295822	chr16	-	89352037	89352076	39	226	213	95	121	97	15	0	0	0	0	0	0	ANKRD11	chr16:89352037-89352076
2756	2.02073	0.000614997	chr16	-	89356897	89356936	39	73	119	78	39	11	23	0	0	0	0	0	0	ANKRD11	chr16:89356897-89356936
2756	1.74063	0.000525445	chr16	-	89356977	89357016	39	80	201	148	40	40	120	1	1	0	0	0	0	ANKRD11	chr16:89356977-89357016
38892	1.00848	0.000640537	chr16	+	89360619	89360718	99	1938	1689	1153	2055	1633	1085	4	1	4	0	0	0		chr16:89360619-89360718
38892	1.09229	0.000700681	chr16	+	89360879	89360918	39	325	580	265	168	385	508	0	0	0	0	0	0		chr16:89360879-89360918
38892	1.67692	0.000180924	chr16	+	89361579	89361698	119	1160	747	777	641	427	388	2	0	0	0	0	1		chr16:89361579-89361698
38892	3.0143	7.25797e-05	chr16	+	89361819	89361938	119	729	1314	524	533	5	77	0	3	3	1	0	0		chr16:89361819-89361938
38892	2.75	1.69756e-05	chr16	+	89361979	89362118	139	1166	1188	839	707	0	193	4	1	2	1	0	0		chr16:89361979-89362118
38894	1.73596	0.00035512	chr16	+	89371294	89371313	19	44	131	74	80	38	0	0	0	0	0	0	0		chr16:89371294-89371313
38895	1.68919	0.000245866	chr16	+	89373747	89373766	19	100	115	100	18	113	27	0	0	0	0	1	0		chr16:89373747-89373766
38896	1.93878	0.000819077	chr16	+	89381687	89381726	39	117	73	66	0	76	0	1	0	0	0	0	0		chr16:89381687-89381726
38896	1.62515	0.000407299	chr16	+	89381787	89381866	79	247	551	345	383	148	80	0	0	0	0	0	0		chr16:89381787-89381866
38899	1.91667	0.000261239	chr16	+	89623165	89623264	99	97	72	106	0	0	0	0	0	0	0	0	0	SPG7	chr16:89623165-89623264
38903	2.46405	0.000177038	chr16	+	89788975	89789054	79	161	178	175	37	29	0	0	0	0	0	0	0	ZNF276	chr16:89788975-89789054
2760	1.94444	0.000494759	chr16	-	89805128	89805187	59	60	110	0	0	0	0	0	0	0	0	0	0	FANCA	chr16:89805128-89805187
2761	2.30405	0.000368998	chr16	-	89836336	89836395	59	338	400	101	59	85	120	0	1	0	0	0	0	FANCA	chr16:89836336-89836395
22379	1.37456	0.00066619	chr17	-	422285	422304	19	105	160	60	80	83	60	0	0	1	0	0	0	VPS53	chr17:422285-422304
22379	1.58359	0.000199041	chr17	-	422405	422524	119	1299	1470	917	312	492	1392	1	1	0	1	0	0	VPS53	chr17:422405-422524
22391	2.00366	0.000353388	chr17	-	882223	882302	79	80	112	107	33	0	0	0	1	1	0	0	0	NXN	chr17:882223-882302
11328	2.08036	0.000265329	chr17	+	908612	908691	79	148	375	165	144	0	64	1	0	0	0	0	0		chr17:908612-908691
22409	1.10602	0.0007705	chr17	-	1562751	1562790	39	338	400	442	436	229	390	0	0	1	0	0	1	PRPF8	chr17:1562751-1562790
22411	1.33848	0.000629712	chr17	-	1565198	1565257	59	452	432	229	256	306	230	1	0	1	0	0	0	PRPF8	chr17:1565198-1565257
22419	1.61801	0.000801503	chr17	-	1582934	1582953	19	70	248	143	30	119	113	0	0	0	0	0	0	PRPF8	chr17:1582934-1582953
22441	2.0566	0.000540058	chr17	-	2601344	2601383	39	76	171	65	87	0	5	1	0	0	0	0	0	KIAA0664	chr17:2601344-2601383
22445	2.05882	0.000461075	chr17	-	3910188	3910227	39	100	160	40	15	40	29	0	0	0	0	0	0	ZZEF1	chr17:3910188-3910227
22453	2.64198	2.34523e-06	chr17	-	4444937	4445016	79	173	90	135	0	3	0	0	0	1	0	0	0	MYBBP1A	chr17:4444937-4445016
11365	1.20183	0.000979647	chr17	+	6555210	6555249	39	355	270	160	120	195	320	1	1	1	1	0	1	C17orf100	chr17:6555210-6555249
11365	2.05191	0.00023036	chr17	+	6555270	6555429	159	997	522	507	322	111	304	1	4	1	0	0	4	C17orf100	chr17:6555270-6555429
11365	2.57117	0.000102157	chr17	+	6555470	6555569	99	253	562	318	0	96	166	2	1	0	0	0	0	C17orf100	chr17:6555470-6555569
22489	2.25417	0.000394642	chr17	-	7128300	7128379	79	87	63	143	0	0	0	0	0	2	0	0	0	MIR324 DVL2	chr17:7128300-7128379
22496	1.50669	0.000353342	chr17	-	7218178	7218277	99	790	661	386	636	233	248	0	0	1	0	1	0	NEURL4 GPS2	chr17:7218178-7218277
11380	1.30903	0.000330902	chr17	+	7388112	7388151	39	313	369	397	369	354	76	0	1	0	0	0	0	POLR2A SLC35G6	chr17:7388112-7388151
11387	2.09587	0.000408957	chr17	+	7405930	7406029	99	251	323	394	283	22	0	0	0	0	0	0	0	POLR2A	chr17:7405930-7406029
11388	2.74444	4.7939e-05	chr17	+	7411508	7411567	59	60	199	43	0	0	0	0	3	0	0	0	0	POLR2A	chr17:7411508-7411567
11389	1.10025	0.000529476	chr17	+	7412281	7412360	79	728	1210	945	1233	867	505	0	1	3	2	0	0	POLR2A	chr17:7412281-7412360
11390	1.29728	0.00027525	chr17	+	7414763	7414862	99	1220	1216	690	1024	888	424	0	1	0	1	1	0	POLR2A	chr17:7414763-7414862
11390	2.06958	0.000168756	chr17	+	7415023	7415122	99	1322	2202	945	1107	455	452	0	5	0	0	0	0	POLR2A	chr17:7415023-7415122
11390	3.71373	3.58314e-05	chr17	+	7415183	7415402	219	3799	4945	3788	1506	472	929	9	16	11	3	1	2	POLR2A	chr17:7415183-7415402
11390	2.57273	0.000158454	chr17	+	7415463	7415522	59	249	262	150	74	30	46	1	1	0	0	0	0	POLR2A	chr17:7415463-7415522
11390	2.28	0.000230956	chr17	+	7416163	7416222	59	148	158	198	0	120	0	0	0	0	0	0	0	POLR2A	chr17:7416163-7416222
11391	3.12083	4.87268e-05	chr17	+	7416354	7416433	79	229	276	0	0	0	0	0	1	0	0	0	0	POLR2A	chr17:7416354-7416433
11391	2.99224	0.000179711	chr17	+	7416874	7417033	159	210	595	638	0	114	50	0	0	1	0	0	0	POLR2A	chr17:7416874-7417033
11391	2.35673	0.000155131	chr17	+	7417374	7417453	79	80	289	197	0	74	28	0	0	0	0	0	0	POLR2A	chr17:7417374-7417453
11396	0.947962	0.000741075	chr17	+	7481225	7481244	19	187	450	396	481	331	277	0	0	0	0	1	0	EIF4A1 SNORD10 SNORA67 CD68 SENP3-EIF4A1	chr17:7481225-7481244
11399	1.22222	0.000986947	chr17	+	7554876	7554895	19	90	175	100	133	98	56	1	0	0	0	0	1	ATP1B2	chr17:7554876-7554895
11400	2.53409	6.83116e-05	chr17	+	7556790	7556909	119	176	240	339	45	13	22	0	0	0	0	0	0	ATP1B2	chr17:7556790-7556909
22561	1.61945	0.000298102	chr17	-	17398326	17398365	39	199	240	195	159	154	40	3	0	0	0	0	0	RASD1	chr17:17398326-17398365
22561	1.23239	0.000743715	chr17	-	17398406	17398465	59	462	561	193	522	258	176	1	0	0	0	0	0	RASD1	chr17:17398406-17398465
22561	1.67163	0.00016289	chr17	-	17399306	17399445	139	1325	1129	1144	1207	627	152	1	2	3	2	0	1	RASD1	chr17:17399306-17399445
22565	2.69417	1.52123e-05	chr17	-	18149593	18149652	59	139	176	60	18	1	7	0	0	0	0	0	0	FLII	chr17:18149593-18149652
11492	1.76173	0.000704529	chr17	+	21188201	21188240	39	159	100	101	50	47	60	2	0	0	0	0	0	MAP2K3	chr17:21188201-21188240
11492	1.74897	0.000381212	chr17	+	21188361	21188480	119	707	759	276	524	235	92	2	1	1	0	0	0	MAP2K3	chr17:21188361-21188480
11528	1.76667	0.000513407	chr17	+	27075332	27075431	99	100	27	95	0	0	0	0	1	1	0	0	0	TRAF4	chr17:27075332-27075431
22614	1.52725	0.000661344	chr17	-	27401677	27401736	59	306	171	380	194	181	120	0	0	0	0	0	1	MYO18A TIAF1	chr17:27401677-27401736
22616	2.02632	0.000254451	chr17	-	27442751	27442830	79	363	319	148	100	119	73	1	0	1	0	0	0	MYO18A	chr17:27442751-27442830
22616	3.47183	4.5775e-05	chr17	-	27442971	27443110	139	391	367	297	6	0	0	0	1	0	0	0	0	MYO18A	chr17:27442971-27443110
11571	0.846053	0.000598384	chr17	+	31149578	31149617	39	2455	1976	1265	3434	2052	1261	1	0	0	1	1	1		chr17:31149578-31149617
11571	5.39563	2.32223e-08	chr17	+	31149758	31149877	119	740	385	726	0	52	0	1	0	2	0	0	0		chr17:31149758-31149877
22649	3.36491	2.48313e-05	chr17	-	31149759	31149818	59	260	200	223	83	0	14	8	8	8	2	0	0	MYO1D	chr17:31149759-31149818
11633	1.57649	0.000298938	chr17	+	37819146	37819225	79	421	689	470	296	328	285	0	0	1	0	1	1	STARD3	chr17:37819146-37819225
22729	1.31579	0.000688959	chr17	-	40075054	40075093	39	240	325	149	228	185	113	2	2	0	0	0	0	ACLY	chr17:40075054-40075093
11659	2.68439	0.000110056	chr17	+	40714619	40714718	99	251	158	99	1	0	0	0	0	0	0	0	0	COASY	chr17:40714619-40714718
11691	1.9037	0.000675527	chr17	+	41439029	41439108	79	80	110	80	0	0	30	0	1	0	0	0	0		chr17:41439029-41439108
11692	2.71939	3.59188e-05	chr17	+	41441186	41441245	59	98	132	119	2	0	14	1	0	0	0	0	0		chr17:41441186-41441245
11693	3.01079	4.10652e-05	chr17	+	41465967	41466066	99	473	497	404	157	79	20	0	0	0	0	0	0		chr17:41465967-41466066
22760	2.21961	0.000157558	chr17	-	41466111	41466250	139	2654	5329	2725	3012	558	1011	11	29	13	20	4	3	LOC100130581	chr17:41466111-41466250
11693	1.54178	0.000262948	chr17	+	41466167	41466246	79	385	651	413	485	273	111	5	7	4	4	3	0		chr17:41466167-41466246
11694	1.74259	0.000372608	chr17	+	41477216	41477275	59	185	349	227	183	117	60	0	0	0	0	0	0	ARL4D	chr17:41477216-41477275
22773	2.52222	8.79178e-05	chr17	-	43012665	43012724	59	120	150	0	0	0	0	1	0	0	0	0	0	KIF18B	chr17:43012665-43012724
22827	0.972439	0.000380856	chr17	-	49197713	49197812	99	2537	2941	2305	5167	1876	1002	2	3	3	0	0	0	SPAG9	chr17:49197713-49197812
22827	0.978889	0.000806503	chr17	-	49197893	49197932	39	447	657	538	1038	449	189	0	0	0	1	0	0	SPAG9	chr17:49197893-49197932
22827	1.25408	0.000243151	chr17	-	49197973	49198092	119	1689	2084	1794	2990	635	757	6	6	3	5	2	1	SPAG9	chr17:49197973-49198092
22847	1.45923	0.000808438	chr17	-	56599139	56599158	19	120	80	80	33	100	40	0	0	0	0	0	0	2014-09-04	chr17:56599139-56599158
22931	0.955786	0.000731406	chr17	-	61896962	61896981	19	384	372	200	380	279	340	0	0	0	0	0	1	FTSJ3	chr17:61896962-61896981
11969	1.70455	0.000612892	chr17	+	61905053	61905072	19	57	178	80	73	27	60	0	0	0	0	0	0	PSMC5	chr17:61905053-61905072
22953	0.802456	0.000749133	chr17	-	62499553	62499592	39	1941	2891	1808	2421	3510	2406	2	3	4	2	1	0	DDX5	chr17:62499553-62499592
22953	0.80323	0.000852137	chr17	-	62500873	62500932	59	2584	3418	2644	3702	4235	2886	0	2	5	1	1	3	DDX5	chr17:62500873-62500932
11975	2.24444	0.000407724	chr17	+	62503226	62503265	39	140	118	26	33	27	0	0	0	0	0	0	0	CEP95	chr17:62503226-62503265
11983	1.08761	0.000653753	chr17	+	64298965	64299064	99	1226	843	1157	1822	889	238	1	1	1	1	0	0	PRKCA	chr17:64298965-64299064
12018	2.625	5.96853e-05	chr17	+	66195646	66195725	79	190	166	135	16	0	24	1	0	0	0	0	0	LOC440461	chr17:66195646-66195725
12018	2.51892	0.000170024	chr17	+	66196446	66196525	79	192	247	245	73	9	48	1	1	0	0	0	0	LOC440461	chr17:66196446-66196525
12018	2.47953	9.52606e-05	chr17	+	66197466	66197545	79	236	142	230	44	0	58	0	0	0	0	0	0	LOC440461	chr17:66197466-66197545
22994	1.78333	0.000487118	chr17	-	67322809	67322908	99	93	40	98	0	0	0	0	0	1	0	0	0	ABCA5	chr17:67322809-67322908
12269	2.05	0.000694353	chr17	+	72745499	72745558	59	120	120	60	60	0	0	1	2	0	0	0	0	SLC9A3R1 MIR3615	chr17:72745499-72745558
23006	1.48357	0.000893747	chr17	-	72768157	72768176	19	66	100	90	94	30	29	0	0	0	0	0	0	NAT9	chr17:72768157-72768176
12273	2.09434	0.00046398	chr17	+	72835479	72835518	39	164	120	40	0	49	43	0	0	0	0	0	0	TMEM104	chr17:72835479-72835518
23016	1.76667	0.000657323	chr17	-	73127131	73127210	79	0	104	80	0	0	0	0	0	0	0	0	0	NT5C	chr17:73127131-73127210
23022	1.65111	5.20904e-05	chr17	-	73149872	73149951	79	843	1003	842	745	604	211	4	6	1	0	0	0	HN1	chr17:73149872-73149951
23025	1.81	0.000663756	chr17	-	73238647	73238746	99	27	128	88	0	0	0	0	0	0	0	0	0	GGA3	chr17:73238647-73238746
23034	2.31667	0.000292756	chr17	-	73646887	73646946	59	60	196	120	60	0	0	0	0	0	0	0	0	RECQL5	chr17:73646887-73646946
23037	2.67183	8.28348e-05	chr17	-	73760672	73760771	99	182	325	223	87	0	0	0	0	1	0	0	0	GALK1	chr17:73760672-73760771
23037	1.91667	0.000426913	chr17	-	73760812	73760871	59	57	91	17	0	0	0	0	0	0	0	0	0	GALK1	chr17:73760812-73760871
23038	1.52222	0.000607321	chr17	-	73771336	73771375	39	205	273	83	154	19	157	0	1	0	0	0	0	H3F3B	chr17:73771336-73771375
12295	2.57598	9.67495e-05	chr17	+	74276948	74277047	99	193	397	153	100	0	0	1	0	1	2	0	0		chr17:74276948-74277047
23061	2.01667	4.61252e-05	chr17	-	74392912	74392971	59	60	60	63	0	0	0	0	0	0	0	0	0	UBE2O	chr17:74392912-74392971
23078	1.66667	0.000845259	chr17	-	76171254	76171313	59	60	0	60	0	0	0	0	0	0	0	0	0	TK1	chr17:76171254-76171313
12319	1.73333	0.000753429	chr17	+	76210106	76210165	59	0	72	60	0	0	0	0	0	0	0	0	0	BIRC5	chr17:76210106-76210165
12319	1.77222	0.000437594	chr17	+	76210206	76210265	59	48	27	60	0	0	0	1	0	0	0	0	0	BIRC5	chr17:76210206-76210265
23081	1.56637	0.000442795	chr17	-	76354758	76354777	19	107	119	60	106	20	40	0	0	2	0	0	0	SOCS3	chr17:76354758-76354777
23081	2.30239	0.000164791	chr17	-	76355538	76355657	119	512	282	566	315	79	0	0	2	2	0	0	0	SOCS3	chr17:76355538-76355657
23081	2.54497	5.27506e-05	chr17	-	76355838	76356077	239	2694	1847	1465	1473	256	181	1	1	0	3	1	0	SOCS3	chr17:76355838-76356077
23088	1.3944	0.000203483	chr17	-	76799742	76799781	39	232	521	306	158	320	255	1	3	0	0	1	0	USP36	chr17:76799742-76799781
23088	1.22905	0.000967181	chr17	-	76799802	76799821	19	92	156	132	80	154	64	0	0	0	0	0	0	USP36	chr17:76799802-76799821
23089	1.60945	0.000223578	chr17	-	76803552	76803651	99	756	648	592	48	569	514	2	2	1	0	1	1	USP36	chr17:76803552-76803651
12334	0.962213	0.000513885	chr17	+	78261712	78261751	39	804	1111	415	1336	645	458	2	2	1	0	2	0	RNF213	chr17:78261712-78261751
12334	1.09206	0.000341525	chr17	+	78261872	78261971	99	2026	2394	2049	3841	1499	583	5	2	3	2	1	0	RNF213	chr17:78261872-78261971
12338	1.97021	0.000495973	chr17	+	78268839	78268878	39	154	120	69	41	74	0	0	0	0	0	0	0	RNF213	chr17:78268839-78268878
12350	1.40455	0.000551741	chr17	+	78327326	78327365	39	152	350	176	116	179	156	0	1	0	0	0	0	RNF213	chr17:78327326-78327365
12351	1.65704	0.000156798	chr17	+	78334230	78334289	59	587	412	240	407	109	170	3	0	1	0	0	0	RNF213	chr17:78334230-78334289
12351	1.86538	0.000255069	chr17	+	78335490	78335529	39	109	240	109	64	119	9	1	0	0	0	0	0	RNF213	chr17:78335490-78335529
12351	1.24804	0.000713034	chr17	+	78335650	78335669	19	139	161	118	120	124	75	0	0	0	1	0	0	RNF213	chr17:78335650-78335669
12351	1.43013	0.000296722	chr17	+	78337230	78337309	79	546	983	716	399	383	720	0	3	0	0	1	0	RNF213	chr17:78337230-78337309
12356	1.90762	0.000164302	chr17	+	78355568	78355707	139	1808	1833	1465	1495	423	547	0	2	0	1	2	1	RNF213	chr17:78355568-78355707
12356	1.0765	0.000683443	chr17	+	78355748	78355787	39	482	520	257	555	240	362	0	0	0	1	0	0	RNF213	chr17:78355748-78355787
12356	1.22303	0.000603455	chr17	+	78358088	78358147	59	321	745	605	445	445	438	0	1	1	1	2	0	RNF213	chr17:78358088-78358147
12362	1.69474	0.000803822	chr17	+	78939461	78939500	39	147	276	97	190	30	40	0	1	0	0	0	0	RPTOR	chr17:78939461-78939500
12362	1.68106	0.000848885	chr17	+	78939521	78939560	39	80	187	119	145	0	36	0	0	0	0	0	0	RPTOR	chr17:78939521-78939560
12364	3.1535	8.18077e-05	chr17	+	79009321	79009540	219	1009	705	408	65	57	100	3	0	0	1	0	0	BAIAP2	chr17:79009321-79009540
12364	1.86894	0.000117681	chr17	+	79009621	79009700	79	2046	1436	913	1437	569	245	4	2	1	1	0	0	BAIAP2	chr17:79009621-79009700
12364	1.29682	0.000144176	chr17	+	79009721	79009740	19	458	283	217	450	175	100	0	0	0	0	0	0	BAIAP2	chr17:79009721-79009740
12364	1.74154	0.000171224	chr17	+	79009841	79009980	139	1939	2317	1300	912	955	1164	6	5	1	2	0	0	BAIAP2	chr17:79009841-79009980
12364	1.38955	0.000375849	chr17	+	79010001	79010120	119	1701	1022	1218	1419	743	574	18	9	8	12	9	4	BAIAP2	chr17:79010001-79010120
12364	1.44533	0.000318773	chr17	+	79010321	79010380	59	601	360	305	321	265	240	1	1	0	0	0	0	BAIAP2	chr17:79010321-79010380
12364	1.50189	0.000442188	chr17	+	79010701	79010720	19	99	106	133	80	105	20	0	0	0	0	0	0	BAIAP2	chr17:79010701-79010720
12364	2.04963	8.52024e-05	chr17	+	79011081	79011180	99	1272	959	786	513	380	431	4	3	0	0	1	1	BAIAP2	chr17:79011081-79011180
12364	1.84524	0.000622207	chr17	+	79011541	79011580	39	122	144	79	92	31	9	0	0	0	0	0	0	BAIAP2	chr17:79011541-79011580
12364	1.44574	0.000564262	chr17	+	79011821	79011840	19	120	145	40	46	81	71	0	1	1	0	0	0	BAIAP2	chr17:79011821-79011840
12364	1.73611	0.00044577	chr17	+	79012041	79012080	39	114	160	227	200	40	0	0	1	0	0	0	0	BAIAP2	chr17:79012041-79012080
12364	1.54167	0.000646976	chr17	+	79012101	79012120	19	54	92	127	96	60	0	0	0	0	0	0	0	BAIAP2	chr17:79012101-79012120
12364	1.54948	0.000793148	chr17	+	79012181	79012220	39	194	199	74	80	144	40	1	0	1	0	0	0	BAIAP2	chr17:79012181-79012220
12364	1.65816	0.000444651	chr17	+	79012361	79012380	19	100	81	84	72	4	60	0	0	0	0	0	0	BAIAP2	chr17:79012361-79012380
12364	3.12386	2.86181e-05	chr17	+	79012401	79012600	199	1130	1015	985	196	44	363	3	0	4	0	0	0	BAIAP2	chr17:79012401-79012600
12364	1.84302	0.000980676	chr17	+	79012701	79012720	19	72	56	129	12	40	60	0	0	0	0	0	0	BAIAP2	chr17:79012701-79012720
12364	2.21344	0.000255284	chr17	+	79013181	79013240	59	178	145	53	0	60	13	1	0	0	0	0	0	BAIAP2	chr17:79013181-79013240
12365	1.69379	0.000507985	chr17	+	79014173	79014252	79	368	368	248	80	137	268	1	0	0	0	0	0	BAIAP2	chr17:79014173-79014252
12365	1.98373	0.000335783	chr17	+	79014653	79014732	79	249	261	339	233	0	80	0	0	2	0	0	0	BAIAP2	chr17:79014653-79014732
12366	2.03333	0.000368915	chr17	+	79017169	79017268	99	119	191	0	0	0	0	0	0	0	0	0	0	BAIAP2	chr17:79017169-79017268
12366	2.35	0.000327236	chr17	+	79017289	79017368	79	203	61	56	0	0	0	0	1	0	0	0	0	BAIAP2	chr17:79017289-79017368
12366	2.16019	0.000387797	chr17	+	79017529	79017588	59	78	103	80	0	26	0	0	0	1	0	0	0	BAIAP2	chr17:79017529-79017588
12366	3.64901	0.000123769	chr17	+	79017629	79017768	139	442	437	354	0	33	0	0	0	0	0	0	0	BAIAP2	chr17:79017629-79017768
12366	2.29286	3.4673e-05	chr17	+	79017789	79017928	139	167	248	128	0	0	0	0	0	0	0	0	0	BAIAP2	chr17:79017789-79017928
12366	2.96721	0.000209373	chr17	+	79018749	79018808	59	174	161	0	0	3	0	3	4	0	0	0	0	BAIAP2	chr17:79018749-79018808
12366	2.74187	3.9549e-05	chr17	+	79019029	79019148	119	415	287	287	132	0	0	0	0	0	0	0	0	BAIAP2	chr17:79019029-79019148
12368	3.06576	3.67468e-05	chr17	+	79077767	79077886	119	482	404	102	81	0	0	0	1	0	0	0	0	BAIAP2	chr17:79077767-79077886
12369	1.56441	0.000693293	chr17	+	79083323	79083382	59	194	353	180	226	81	103	1	1	2	0	0	0	BAIAP2	chr17:79083323-79083382
23102	1.82796	0.000537937	chr17	-	79171576	79171615	39	66	178	146	93	66	0	0	0	0	0	0	0	AZI1	chr17:79171576-79171615
23102	2.73646	0.000124837	chr17	-	79171916	79172055	139	676	857	261	140	140	119	6	7	2	1	1	1	AZI1	chr17:79171916-79172055
23104	2.13519	0.000107947	chr17	-	79219963	79220062	99	483	858	424	386	106	177	0	1	0	0	0	0	SLC38A10	chr17:79219963-79220062
23104	1.55901	0.000450679	chr17	-	79220743	79220802	59	349	257	408	351	120	120	1	1	0	0	0	0	SLC38A10	chr17:79220743-79220802
23104	1.67802	0.000681495	chr17	-	79221143	79221182	39	142	200	80	61	142	0	0	0	0	0	0	0	SLC38A10	chr17:79221143-79221182
23106	1.98925	0.000301011	chr17	-	79232127	79232186	59	50	80	60	0	0	6	0	0	0	0	0	0	SLC38A10	chr17:79232127-79232186
23106	3.06115	9.21962e-06	chr17	-	79232327	79232586	259	443	466	714	5	0	0	0	0	0	0	0	0	SLC38A10	chr17:79232327-79232586
23106	2.0332	0.000358537	chr17	-	79232687	79232726	39	160	170	40	81	0	40	0	0	0	0	0	0	SLC38A10	chr17:79232687-79232726
23108	1.71298	0.000413924	chr17	-	79268730	79268829	99	446	471	267	381	91	98	1	2	2	2	0	0	SLC38A10	chr17:79268730-79268829
23112	1.92289	0.000330908	chr17	-	79479444	79479503	59	256	178	180	104	60	63	0	0	1	1	0	1	ACTG1	chr17:79479444-79479503
23113	2.03333	0.000163812	chr17	-	79514898	79514977	79	80	75	93	0	0	0	0	0	0	0	0	0	C17orf70	chr17:79514898-79514977
23113	1.775	0.000547935	chr17	-	79515218	79515297	79	44	62	80	0	0	0	0	0	0	0	0	0	C17orf70	chr17:79515218-79515297
23113	2.10101	0.000389481	chr17	-	79516658	79516697	39	120	59	117	0	38	40	0	0	0	0	0	0	C17orf70	chr17:79516658-79516697
23113	2.19444	1.15577e-05	chr17	-	79516818	79516877	59	84	60	67	0	0	0	0	0	1	0	0	0	C17orf70	chr17:79516818-79516877
23113	2.525	1.2841e-06	chr17	-	79517318	79517397	79	149	74	143	0	0	0	0	0	0	0	0	0	C17orf70	chr17:79517318-79517397
23118	2.12637	0.000359507	chr17	-	79632047	79632106	59	99	101	7	0	0	2	0	0	0	0	0	0	C17orf90	chr17:79632047-79632106
23119	2.02013	0.000521313	chr17	-	79646787	79646866	79	56	158	144	55	0	3	1	0	0	0	0	0	ARL16	chr17:79646787-79646866
12373	1.58721	0.000920087	chr17	+	79651491	79651530	39	158	178	90	114	70	40	0	0	0	0	0	0	HGS	chr17:79651491-79651530
12373	2.25226	0.000190085	chr17	+	79652411	79652530	119	674	361	338	138	99	172	2	0	0	0	0	1	HGS	chr17:79652411-79652530
12374	1.76056	0.000664864	chr17	+	79659179	79659218	39	160	133	67	40	120	0	0	5	0	1	0	0	HGS	chr17:79659179-79659218
12374	2.45455	0.000175968	chr17	+	79659399	79659478	79	221	203	273	0	75	70	0	1	1	0	0	0	HGS	chr17:79659399-79659478
12374	1.87917	0.000626444	chr17	+	79659499	79659538	39	120	121	86	0	40	80	1	0	0	0	0	0	HGS	chr17:79659499-79659538
12374	1.875	0.000393181	chr17	+	79659679	79659758	79	252	455	249	192	128	80	1	0	0	0	0	0	HGS	chr17:79659679-79659758
12374	2.38244	0.000315687	chr17	+	79660419	79660518	99	253	130	154	0	53	0	0	0	1	0	0	0	HGS	chr17:79660419-79660518
12374	1.32867	0.000970912	chr17	+	79660739	79660758	19	120	100	100	100	86	40	0	0	0	0	0	0	HGS	chr17:79660739-79660758
12374	2.1674	0.000366101	chr17	+	79661259	79661378	119	214	193	209	0	94	0	1	0	1	0	0	0	HGS	chr17:79661259-79661378
12375	2.01639	0.000614337	chr17	+	79662725	79662764	39	98	40	111	0	23	40	0	0	0	0	0	0	HGS	chr17:79662725-79662764
12375	1.47998	0.000197495	chr17	+	79663445	79663564	119	1225	1198	635	822	794	347	0	3	2	0	0	0	HGS	chr17:79663445-79663564
12377	2.73667	1.79026e-06	chr17	+	79675199	79675298	99	151	244	122	0	0	0	0	1	0	0	0	0	MRPL12	chr17:79675199-79675298
12377	2.4234	0.000217114	chr17	+	79675619	79675718	99	154	234	182	23	36	0	0	0	0	0	0	0	MRPL12	chr17:79675619-79675718
12378	1.83438	0.000568963	chr17	+	79681278	79681317	39	80	263	120	160	40	0	0	0	1	0	0	0	SLC25A10	chr17:79681278-79681317
12378	1.9235	0.000424778	chr17	+	79681878	79681937	59	22	88	58	0	3	0	0	0	1	0	0	0	SLC25A10	chr17:79681878-79681937
12379	2.04444	4.04875e-05	chr17	+	79686866	79686925	59	60	60	60	0	0	0	1	0	1	0	0	0	SLC25A10	chr17:79686866-79686925
23130	1.43382	0.000281142	chr17	-	79816768	79816887	119	1261	980	1016	1132	688	351	1	2	0	0	0	0	P4HB	chr17:79816768-79816887
12383	2.14488	0.000322069	chr17	+	79827483	79827542	59	126	159	138	43	60	0	1	0	0	0	0	0		chr17:79827483-79827542
23138	1.68889	0.00084911	chr17	-	79846902	79846961	59	0	60	60	0	0	0	0	0	1	0	0	0	ALYREF	chr17:79846902-79846961
23140	2.25	0.000120369	chr17	-	79862878	79862937	59	105	120	0	0	0	0	0	0	0	0	0	0	PCYT2	chr17:79862878-79862937
23146	2.27917	0.000217287	chr17	-	79977560	79977639	79	0	154	153	0	0	0	0	0	0	0	0	0	STRA13	chr17:79977560-79977639
23147	1.88837	0.000858377	chr17	-	79993508	79993547	39	102	64	116	40	40	15	0	0	1	0	0	0	DCXR	chr17:79993508-79993547
23148	1.75735	0.000228631	chr17	-	80008183	80008322	139	635	990	526	347	334	354	0	0	0	0	0	2	RFNG	chr17:80008183-80008322
23148	2.41228	8.25053e-05	chr17	-	80008383	80008482	99	97	230	198	5	0	37	0	0	0	0	0	0	RFNG	chr17:80008383-80008482
23148	1.98638	0.000273973	chr17	-	80008863	80009082	219	218	311	120	1	0	0	1	0	0	0	0	0	RFNG	chr17:80008863-80009082
12388	1.82492	0.000419303	chr17	+	80013674	80013713	39	168	135	111	56	65	56	1	0	1	0	0	0	GPS1	chr17:80013674-80013713
12388	1.57782	0.000787665	chr17	+	80014294	80014353	59	184	320	198	199	60	120	0	0	0	0	0	0	GPS1	chr17:80014294-80014353
23150	2.18072	0.000259973	chr17	-	80017606	80017725	119	265	158	118	0	55	0	1	0	0	0	0	0	DUS1L	chr17:80017606-80017725
23150	2.35526	0.000128919	chr17	-	80018026	80018105	79	92	246	138	64	0	0	0	0	0	0	0	0	DUS1L	chr17:80018026-80018105
23151	2.33889	2.44754e-05	chr17	-	80018780	80018839	59	57	73	107	0	0	0	1	0	0	0	0	0	DUS1L	chr17:80018780-80018839
23151	2.47778	2.06259e-05	chr17	-	80018860	80018919	59	39	82	141	0	0	0	0	1	0	0	0	0	DUS1L	chr17:80018860-80018919
23153	1.92757	0.000335059	chr17	-	80047152	80047211	59	300	225	120	60	68	120	0	0	0	0	0	0	FASN	chr17:80047152-80047211
23153	1.68889	0.000718093	chr17	-	80048072	80048131	59	60	0	60	0	0	0	1	0	0	0	0	0	FASN	chr17:80048072-80048131
23154	2.19772	6.56563e-05	chr17	-	80048809	80048908	99	483	692	247	489	0	0	1	2	0	0	0	0	FASN	chr17:80048809-80048908
23154	2.85924	9.43622e-06	chr17	-	80049289	80049368	79	262	310	155	101	0	0	1	1	0	0	0	0	FASN	chr17:80049289-80049368
23155	1.9913	0.00054954	chr17	-	80051114	80051153	39	81	173	80	40	40	30	0	1	0	0	0	0	FASN	chr17:80051114-80051153
23155	2.21191	4.73015e-05	chr17	-	80051514	80051613	99	589	665	373	100	373	100	0	1	0	0	0	0	FASN	chr17:80051514-80051613
23156	3.44075	1.37053e-05	chr17	-	80052903	80053002	99	198	682	471	100	81	0	0	1	0	0	0	0	FASN	chr17:80052903-80053002
23156	2.11163	7.80104e-05	chr17	-	80053243	80053342	99	489	546	473	365	187	0	1	0	1	2	0	0	FASN	chr17:80053243-80053342
23156	2.70833	3.22444e-05	chr17	-	80054263	80054382	119	326	478	380	147	69	0	1	1	2	0	0	0	FASN	chr17:80054263-80054382
12392	1.46125	0.000486167	chr17	+	80416935	80417014	79	431	629	246	479	66	273	0	0	0	0	0	0	NARF	chr17:80416935-80417014
12408	1.99288	0.000442491	chr17	+	80869960	80870079	119	458	241	340	170	172	0	0	0	0	0	0	0	TBCD	chr17:80869960-80870079
12408	1.96926	0.000285771	chr17	+	80870100	80870179	79	311	222	312	235	47	31	1	0	0	0	0	0	TBCD	chr17:80870100-80870179
12408	1.74816	0.000391409	chr17	+	80871300	80871499	199	899	532	803	869	0	155	2	0	1	1	0	0	TBCD	chr17:80871300-80871499
12408	2.10333	0.000290721	chr17	+	80871540	80871639	99	161	39	123	0	0	0	2	0	0	0	0	0	TBCD	chr17:80871540-80871639
12408	3.05714	0.000781844	chr17	+	80871760	80871779	19	209	60	99	20	20	40	0	0	0	0	0	0	TBCD	chr17:80871760-80871779
12409	1.77818	0.000632182	chr17	+	80873084	80873163	79	316	301	121	61	63	186	0	0	0	0	0	0	TBCD	chr17:80873084-80873163
12411	1.71667	0.000733401	chr17	+	80895827	80895886	59	9	60	60	0	0	0	0	0	0	0	0	0	TBCD	chr17:80895827-80895886
984	2.19425	0.000264475	chr18	-	112188	112267	79	690	531	440	403	73	154	0	0	2	0	0	0		chr18:112188-112267
1025	1.15185	0.000674124	chr18	-	18690938	18690977	39	291	373	452	418	324	218	1	0	1	0	0	0	ROCK1	chr18:18690938-18690977
1025	2.54237	0.000224903	chr18	-	18691258	18691337	79	175	218	255	52	62	0	0	0	3	0	0	0	ROCK1	chr18:18691258-18691337
18167	2.40116	8.84586e-05	chr18	+	23806806	23806845	39	93	154	42	43	0	9	1	0	0	0	0	0	TAF4B	chr18:23806806-23806845
1114	1.98143	0.000408028	chr18	-	47808997	47809056	59	254	118	187	60	0	137	0	1	1	0	0	0	MBD1 CXXC1	chr18:47808997-47809056
18238	1.61124	0.000493334	chr18	+	59854663	59854762	99	355	877	483	360	378	225	0	2	3	0	0	0	KIAA1468	chr18:59854663-59854762
25984	2.56389	0.000113335	chr19	+	542242	542361	119	0	327	224	0	0	0	0	2	1	0	0	0	GZMM CDC34	chr19:542242-542361
25986	2	0.000460749	chr19	+	579674	579733	59	0	120	60	0	0	0	0	0	0	0	0	0	BSG	chr19:579674-579733
10348	2.02159	0.000217974	chr19	-	651163	651262	99	465	449	280	200	185	56	0	1	0	0	0	0	RNF126	chr19:651163-651262
10348	2.63125	0.000203369	chr19	-	651283	651362	79	182	311	109	80	0	0	0	0	0	0	0	0	RNF126	chr19:651283-651362
10348	2.01288	0.000812306	chr19	-	651603	651662	59	89	142	54	0	0	53	0	1	0	0	0	0	RNF126	chr19:651603-651662
10348	2.01395	0.000446855	chr19	-	651723	651762	39	67	109	137	0	26	69	0	0	0	0	0	0	RNF126	chr19:651723-651762
10348	1.91667	0.000287557	chr19	-	652223	652322	99	131	44	100	0	0	0	0	0	0	0	0	0	RNF126	chr19:652223-652322
25989	2.60729	3.33484e-05	chr19	+	803730	803809	79	119	128	153	7	0	0	0	0	1	0	0	0	PTBP1 MIR4745	chr19:803730-803809
25989	1.9537	0.000135767	chr19	+	804570	804769	199	1152	1072	954	681	572	87	2	2	1	1	0	0	PTBP1 MIR4745	chr19:804570-804769
25990	2.05	0.000448487	chr19	+	805625	805684	59	177	125	133	120	0	0	0	0	0	0	0	0	PTBP1 MIR4745	chr19:805625-805684
25990	2.26667	0.000388318	chr19	+	806105	806204	99	183	193	0	0	0	0	0	1	0	0	0	0	PTBP1 MIR4745	chr19:806105-806204
25990	1.66667	0.000973283	chr19	+	806345	806404	59	0	60	60	0	0	0	0	0	0	0	0	0	PTBP1 MIR4745	chr19:806345-806404
25990	1.73558	0.000967692	chr19	+	806585	806604	19	40	132	129	38	90	20	0	0	0	0	0	0	PTBP1 MIR4745	chr19:806585-806604
10351	0.966873	0.000849829	chr19	-	1014224	1014283	59	940	908	624	1612	676	271	0	1	0	1	1	0	C19orf6	chr19:1014224-1014283
10352	3.17113	3.32929e-05	chr19	-	1019295	1019454	159	559	271	228	5	0	0	0	0	0	0	0	0	C19orf6	chr19:1019295-1019454
10352	3.33519	2.59925e-05	chr19	-	1019875	1020054	179	74	640	527	0	0	0	0	2	3	0	0	0	C19orf6	chr19:1019875-1020054
10352	2.34426	6.0235e-05	chr19	-	1020215	1020314	99	118	127	166	0	5	0	0	0	1	0	0	0	C19orf6	chr19:1020215-1020314
10352	2.61944	0.000151284	chr19	-	1020635	1020754	119	295	112	172	0	0	0	1	0	0	0	0	0	C19orf6	chr19:1020635-1020754
10352	2.38889	0.000103434	chr19	-	1020775	1020874	99	289	560	266	194	0	100	1	0	0	0	0	0	C19orf6	chr19:1020775-1020874
26000	2.285	0.000172048	chr19	+	1046876	1046915	39	151	97	89	44	0	36	0	0	0	0	0	0	ABCA7	chr19:1046876-1046915
10354	2.49167	8.32093e-05	chr19	-	1089154	1089213	59	73	218	127	0	0	60	0	0	0	0	0	0	POLR2E	chr19:1089154-1089213
10354	1.93714	0.000539583	chr19	-	1089454	1089513	59	101	252	129	103	52	15	1	3	0	0	0	0	POLR2E	chr19:1089454-1089513
26001	2.26194	4.35963e-05	chr19	+	1105121	1105240	119	478	231	379	115	46	128	1	2	2	0	0	0	GPX4	chr19:1105121-1105240
26004	1.52267	0.000716708	chr19	+	1206676	1206755	79	270	435	327	221	215	158	0	0	1	1	0	0	STK11	chr19:1206676-1206755
26004	1.45415	0.000557465	chr19	+	1206856	1206955	99	423	704	571	351	538	196	2	2	0	0	0	0	STK11	chr19:1206856-1206955
26009	3.05926	9.00264e-05	chr19	+	1274812	1274991	179	486	532	94	0	0	0	0	0	0	0	0	0	CIRBP C19orf24	chr19:1274812-1274991
26009	1.79667	0.000606453	chr19	+	1275372	1275471	99	39	100	100	0	0	0	0	0	0	0	0	0	CIRBP C19orf24	chr19:1275372-1275471
26010	2.24339	0.000125343	chr19	+	1279193	1279252	59	124	60	60	1	8	0	0	0	0	0	0	0	C19orf24	chr19:1279193-1279252
26010	2.22835	0.000287405	chr19	+	1279873	1279932	59	119	99	168	14	0	60	0	0	0	0	0	0	C19orf24	chr19:1279873-1279932
26015	2.14	2.72792e-05	chr19	+	1412160	1412259	99	89	154	99	0	0	0	0	0	0	0	0	0	DAZAP1	chr19:1412160-1412259
26017	2	0.000579954	chr19	+	1434659	1434718	59	60	120	0	0	0	0	0	0	0	0	0	0	DAZAP1	chr19:1434659-1434718
10358	2.01105	0.000443998	chr19	-	1440343	1440402	59	89	35	60	1	0	0	0	0	0	0	0	0		chr19:1440343-1440402
10359	2.24167	5.85288e-05	chr19	-	1460092	1460211	119	210	123	110	0	0	0	0	1	0	0	0	0		chr19:1460092-1460211
26020	1.7541	0.000397106	chr19	+	1471388	1471407	19	188	80	100	80	20	84	0	0	0	0	0	0	APC2	chr19:1471388-1471407
10361	2.20915	0.000173859	chr19	-	1475722	1475821	99	88	95	185	6	0	0	0	1	1	0	0	0	C19orf25	chr19:1475722-1475821
10370	2.5	4.28842e-05	chr19	-	1826591	1826650	59	55	101	110	0	0	0	0	1	0	0	0	0	REXO1	chr19:1826591-1826650
10370	2.00496	0.000341116	chr19	-	1826831	1826990	159	837	473	628	399	216	111	1	0	1	0	1	0	REXO1	chr19:1826831-1826990
10370	2.27027	0.000318509	chr19	-	1828371	1828470	99	100	297	135	70	0	0	1	0	1	0	0	0	REXO1	chr19:1828371-1828470
10372	2.20556	0.000237649	chr19	-	1845732	1845791	59	0	110	107	0	0	0	0	0	0	0	0	0	REXO1	chr19:1845732-1845791
10373	1.5473	0.000223808	chr19	-	1847532	1847591	59	281	586	319	212	280	212	0	2	0	0	1	0	REXO1	chr19:1847532-1847591
10373	1.52525	0.000835947	chr19	-	1847692	1847711	19	100	98	44	78	20	40	0	0	0	0	0	0	REXO1	chr19:1847692-1847711
10376	1.71667	0.000956084	chr19	-	1876471	1876530	59	0	60	69	0	0	0	0	0	0	0	0	0	FAM108A1	chr19:1876471-1876530
10378	1.56854	0.000576507	chr19	-	1878561	1878620	59	220	374	233	344	118	0	0	0	0	0	0	0	FAM108A1	chr19:1878561-1878620
26022	1.9072	0.000251638	chr19	+	1924988	1925067	79	228	341	383	148	236	1	0	0	0	0	0	0	SCAMP4	chr19:1924988-1925067
10381	1.07999	0.000357724	chr19	-	2039602	2039681	79	1798	1388	1370	1691	1504	1024	3	3	0	1	0	0	MKNK2	chr19:2039602-2039681
10381	0.87717	0.000822102	chr19	-	2039762	2039781	19	340	572	338	980	250	208	0	1	0	0	0	0	MKNK2	chr19:2039762-2039781
10381	1.34072	0.000467842	chr19	-	2039842	2039861	19	163	146	115	217	20	60	0	0	0	1	0	0	MKNK2	chr19:2039842-2039861
10381	2.30556	5.18461e-05	chr19	-	2040242	2040301	59	89	120	22	0	0	0	0	1	0	0	0	0	MKNK2	chr19:2040242-2040301
10381	1.66274	0.000134908	chr19	-	2041042	2041121	79	1038	678	567	1064	165	54	2	1	1	1	0	0	MKNK2	chr19:2041042-2041121
10381	1.53765	0.000220956	chr19	-	2041162	2041201	39	427	344	253	442	120	67	2	0	3	2	0	0	MKNK2	chr19:2041162-2041201
10381	1.44839	0.000376823	chr19	-	2041842	2041861	19	159	105	113	210	11	29	1	2	0	0	0	0	MKNK2	chr19:2041842-2041861
10381	1.03544	0.000631311	chr19	-	2041942	2041981	39	590	591	306	1050	261	121	0	0	0	0	0	0	MKNK2	chr19:2041942-2041981
10382	2.20833	0.000196565	chr19	-	2042249	2042328	79	44	118	124	0	0	0	0	1	0	0	0	0	MKNK2	chr19:2042249-2042328
10382	1.57829	0.000136168	chr19	-	2042749	2042868	119	2357	1699	1537	1982	545	888	0	5	1	2	0	1	MKNK2	chr19:2042749-2042868
10382	1.37918	0.000838972	chr19	-	2043129	2043148	19	72	121	118	145	20	44	0	0	0	0	0	0	MKNK2	chr19:2043129-2043148
10382	1.25094	0.000304815	chr19	-	2043509	2043568	59	891	576	667	951	384	338	0	1	0	0	0	0	MKNK2	chr19:2043509-2043568
10382	2.15909	0.000637908	chr19	-	2044509	2044528	19	160	120	40	52	20	44	0	0	0	0	0	0	MKNK2	chr19:2044509-2044528
10382	1.80359	0.000319627	chr19	-	2045489	2045568	79	678	1051	337	581	272	190	0	1	1	0	0	0	MKNK2	chr19:2045489-2045568
10382	1.12861	0.000333511	chr19	-	2046209	2046268	59	1204	838	587	1276	674	362	2	0	0	0	0	1	MKNK2	chr19:2046209-2046268
10382	1.29175	0.000423943	chr19	-	2046369	2046388	19	155	295	101	194	147	68	0	0	0	1	0	0	MKNK2	chr19:2046369-2046388
10382	1.00842	0.000354953	chr19	-	2046409	2046508	99	1867	2902	1614	3323	1768	1240	2	1	3	2	1	2	MKNK2	chr19:2046409-2046508
10382	1.45162	9.98604e-05	chr19	-	2046589	2046688	99	3660	2855	2317	3552	1034	1409	4	6	6	7	1	2	MKNK2	chr19:2046589-2046688
10382	1.54867	0.000107832	chr19	-	2047729	2047828	99	876	1188	782	974	452	300	1	0	0	0	0	2	MKNK2	chr19:2047729-2047828
10382	1.47258	0.000117587	chr19	-	2048829	2048928	99	1135	1104	1020	1129	505	487	1	2	0	0	1	0	MKNK2	chr19:2048829-2048928
10382	2.38976	0.000138854	chr19	-	2051049	2051128	79	361	208	264	66	56	87	0	0	0	0	0	0	MKNK2	chr19:2051049-2051128
26025	1.22521	0.000537051	chr19	+	2270674	2270693	19	245	120	168	260	64	100	0	0	0	0	0	0	OAZ1	chr19:2270674-2270693
26025	1.78086	0.00041872	chr19	+	2271014	2271113	99	294	498	318	470	9	15	0	1	0	0	0	0	OAZ1	chr19:2271014-2271113
26025	2.64	2.33346e-05	chr19	+	2271174	2271373	199	627	1131	990	128	189	363	4	10	7	2	1	2	OAZ1	chr19:2271174-2271373
26025	1.42625	0.000468645	chr19	+	2271534	2271613	79	481	534	524	594	209	204	5	6	6	9	2	1	OAZ1	chr19:2271534-2271613
26025	1.90914	3.94087e-05	chr19	+	2271654	2271773	119	1940	2667	1900	1659	1080	488	1	0	0	2	1	0	OAZ1	chr19:2271654-2271773
26025	1.3895	0.000218472	chr19	+	2271954	2271993	39	881	1062	568	777	629	379	1	1	2	0	0	0	OAZ1	chr19:2271954-2271993
26025	1.51548	0.000288047	chr19	+	2272614	2272673	59	846	889	426	520	477	369	0	2	0	0	0	1	OAZ1	chr19:2272614-2272673
26025	1.84877	3.06885e-05	chr19	+	2272714	2272733	19	229	198	108	161	48	55	0	1	0	0	0	0	OAZ1	chr19:2272714-2272733
26025	1.62277	0.000455884	chr19	+	2272814	2272853	39	110	240	253	139	185	0	0	1	0	0	1	0	OAZ1	chr19:2272814-2272853
26025	1.48214	0.000434129	chr19	+	2272934	2272953	19	122	92	141	120	100	0	0	0	0	0	0	0	OAZ1	chr19:2272934-2272953
26025	1.71143	0.000241426	chr19	+	2273834	2273973	139	569	910	991	279	848	139	2	0	2	0	3	0	OAZ1	chr19:2273834-2273973
26025	1.34455	0.000230829	chr19	+	2274054	2274113	59	800	486	684	403	465	557	1	1	0	0	0	0	OAZ1	chr19:2274054-2274113
26025	1.26892	0.000880546	chr19	+	2275154	2275213	59	336	441	317	147	511	166	0	0	0	0	0	0	OAZ1	chr19:2275154-2275213
26025	2.69808	4.08769e-05	chr19	+	2275234	2275813	579	4994	5232	4068	1817	1737	675	15	18	9	5	3	1		chr19:2275234-2275813
26025	3.01948	0.00013823	chr19	+	2275854	2276113	259	1428	1000	815	409	146	0	1	1	0	0	0	0		chr19:2275854-2276113
26025	2.94215	2.80752e-05	chr19	+	2276194	2276253	59	251	120	153	2	60	0	0	2	0	0	0	0		chr19:2276194-2276253
26025	3.42947	7.20241e-05	chr19	+	2276274	2276773	499	2004	1635	2495	178	400	147	3	2	1	0	2	0		chr19:2276274-2276773
26026	2.0404	0.000509389	chr19	+	2278766	2278825	59	134	111	177	60	0	57	0	0	1	0	0	0		chr19:2278766-2278825
26026	3.58835	1.51588e-05	chr19	+	2278846	2278965	119	508	426	489	138	0	0	0	0	1	0	0	0		chr19:2278846-2278965
26027	2.19792	0.000322032	chr19	+	2281953	2282052	99	82	225	237	51	33	0	0	0	0	0	0	0		chr19:2281953-2282052
26027	2.97744	0.00012197	chr19	+	2282313	2282392	79	317	76	159	9	17	0	0	0	0	0	0	0		chr19:2282313-2282392
26027	3.03685	0.000118234	chr19	+	2282413	2282732	319	1359	2449	1126	432	170	388	4	4	2	0	0	1		chr19:2282413-2282732
26027	1.74375	0.00051189	chr19	+	2283213	2283252	39	153	170	115	80	80	40	0	0	0	0	0	0		chr19:2283213-2283252
26028	1.95712	0.000478644	chr19	+	2286216	2286315	99	402	281	295	266	87	0	0	0	0	0	0	0		chr19:2286216-2286315
26028	2.15633	3.27559e-05	chr19	+	2286656	2286695	39	177	328	175	195	27	29	0	0	0	0	0	0		chr19:2286656-2286695
26028	1.69444	0.000424894	chr19	+	2286716	2286735	19	78	120	47	80	20	20	0	0	0	0	0	0		chr19:2286716-2286735
26028	1.85141	0.000629172	chr19	+	2287116	2287155	39	120	129	88	125	2	2	0	1	0	0	0	0		chr19:2287116-2287155
26029	2.12245	0.000326529	chr19	+	2287599	2287738	139	397	427	308	10	248	57	0	1	1	0	0	0		chr19:2287599-2287738
26029	4.11369	8.25295e-05	chr19	+	2289619	2289818	199	1147	1037	915	92	42	172	4	2	1	0	0	0		chr19:2289619-2289818
26029	4.5945	3.08738e-05	chr19	+	2289839	2290198	359	1857	3200	2007	410	54	239	3	5	4	0	0	0		chr19:2289839-2290198
26030	2.27682	0.000228082	chr19	+	2290429	2290508	79	93	180	145	45	0	0	0	0	0	1	0	0		chr19:2290429-2290508
26030	3.60144	4.53324e-05	chr19	+	2290569	2291268	699	3032	3798	3032	1237	0	0	4	5	5	0	0	0		chr19:2290569-2291268
26030	3.35878	0.000158645	chr19	+	2291369	2291468	99	407	819	226	124	0	100	0	2	0	0	0	0		chr19:2291369-2291468
26030	2.47451	0.000142275	chr19	+	2291489	2291548	59	125	232	90	60	0	15	0	0	1	0	0	0		chr19:2291489-2291548
26033	2.6477	0.000316563	chr19	+	2295866	2295945	79	254	325	150	51	58	20	0	2	0	0	0	0		chr19:2295866-2295945
26034	2.64324	5.23529e-06	chr19	+	2300604	2300663	59	60	170	75	0	5	0	0	1	0	0	0	0		chr19:2300604-2300663
26034	2.02778	0.000358378	chr19	+	2300804	2300923	119	47	240	83	0	0	0	0	0	0	0	0	0		chr19:2300804-2300923
26035	3.72973	7.69385e-05	chr19	+	2302451	2302590	139	648	593	543	16	140	16	1	0	0	0	0	0		chr19:2302451-2302590
26035	2.97044	0.000109703	chr19	+	2302731	2302790	59	60	249	106	23	0	0	0	1	1	0	0	0		chr19:2302731-2302790
26035	2.46821	0.000206904	chr19	+	2302811	2302850	39	39	176	92	36	17	0	0	0	0	0	0	0		chr19:2302811-2302850
26035	2.99126	0.000219264	chr19	+	2302891	2303050	159	160	477	590	0	22	70	0	1	0	0	0	0		chr19:2302891-2303050
26035	1.86129	0.000403362	chr19	+	2303251	2303290	39	226	111	120	40	30	120	0	0	0	0	0	0		chr19:2303251-2303290
26035	3.43629	3.66494e-05	chr19	+	2303371	2303470	99	373	443	467	100	63	0	0	1	1	0	0	0		chr19:2303371-2303470
26035	3.56495	6.8057e-05	chr19	+	2303491	2303590	99	509	701	842	217	100	45	2	0	0	0	0	0		chr19:2303491-2303590
26035	1.82263	0.000622974	chr19	+	2303611	2303650	39	196	88	184	133	34	40	1	1	0	0	0	0		chr19:2303611-2303650
26035	1.9305	0.000193665	chr19	+	2303671	2303750	79	507	253	357	237	73	155	0	0	1	0	0	0		chr19:2303671-2303750
26035	1.80062	0.000578106	chr19	+	2303771	2303910	139	441	536	355	342	5	206	0	0	0	0	0	0		chr19:2303771-2303910
26036	2.91111	3.56384e-05	chr19	+	2305416	2305475	59	116	187	37	0	0	0	0	1	0	0	0	0		chr19:2305416-2305475
26036	2.30864	0.000273852	chr19	+	2305776	2305815	39	118	86	42	42	0	0	2	0	0	0	0	0		chr19:2305776-2305815
26036	1.93103	0.000190648	chr19	+	2306436	2306595	159	666	908	682	634	274	33	1	0	1	0	0	0		chr19:2306436-2306595
26036	2.69814	6.73144e-05	chr19	+	2306656	2306875	219	420	355	435	19	0	20	1	3	0	0	0	0		chr19:2306656-2306875
26036	2.94615	0.000587105	chr19	+	2306976	2307035	59	174	98	302	0	0	80	1	0	2	0	0	0		chr19:2306976-2307035
26036	2.12834	0.000405244	chr19	+	2307076	2307115	39	101	65	108	0	0	67	1	0	0	0	0	0		chr19:2307076-2307115
26037	2.27487	0.000293947	chr19	+	2308331	2308430	99	153	197	219	0	82	0	0	0	0	0	0	0		chr19:2308331-2308430
26037	2.73238	8.19599e-05	chr19	+	2308491	2308690	199	399	788	480	0	0	237	4	0	1	0	0	0		chr19:2308491-2308690
26037	1.90476	0.00036659	chr19	+	2310511	2310650	139	167	73	140	0	0	0	0	0	0	0	0	0		chr19:2310511-2310650
26038	2.34021	0.000116736	chr19	+	2316301	2316360	59	251	91	155	111	0	0	0	0	1	0	0	0		chr19:2316301-2316360
26039	3.21594	0.000138897	chr19	+	2320157	2320236	79	358	454	195	0	149	0	0	1	0	0	0	0		chr19:2320157-2320236
26039	2.28916	0.000190277	chr19	+	2320277	2320376	99	149	198	109	0	32	0	0	1	0	0	0	0		chr19:2320277-2320376
26040	2.65667	2.64411e-05	chr19	+	2325061	2325160	99	157	198	134	0	0	0	2	0	0	0	0	0		chr19:2325061-2325160
26040	2.95221	0.000213204	chr19	+	2325321	2325540	219	292	824	609	139	0	17	0	3	3	0	0	0		chr19:2325321-2325540
26040	1.95283	0.00060603	chr19	+	2325561	2325600	39	74	120	96	40	0	40	0	1	0	0	0	3		chr19:2325561-2325600
26041	2.48	0.000163985	chr19	+	2325838	2325957	119	369	335	114	115	0	0	0	0	0	0	0	0		chr19:2325838-2325957
26042	2.20188	0.000213729	chr19	+	2327178	2327217	39	120	80	145	13	40	40	0	0	1	0	0	0	SPPL2B	chr19:2327178-2327217
26043	2.23643	0.000224769	chr19	+	2328364	2328423	59	149	94	150	14	64	0	0	1	0	0	0	0	SPPL2B	chr19:2328364-2328423
26043	2.82897	1.46684e-05	chr19	+	2328484	2328663	179	397	429	251	15	18	0	1	0	0	0	0	0	SPPL2B	chr19:2328484-2328663
26043	2.36145	0.000245279	chr19	+	2328804	2328863	59	172	176	60	0	60	9	0	0	0	0	0	0	SPPL2B	chr19:2328804-2328863
26043	2.06747	0.000206667	chr19	+	2328944	2329003	59	220	318	116	175	0	60	4	1	1	0	0	0	SPPL2B	chr19:2328944-2329003
26043	2.32534	9.25285e-05	chr19	+	2329104	2329363	259	2098	2974	1666	1238	489	725	4	5	2	3	1	1	SPPL2B	chr19:2329104-2329363
26043	1.30408	0.000785572	chr19	+	2329984	2330023	39	226	275	241	163	110	268	0	0	0	0	0	0	SPPL2B	chr19:2329984-2330023
26043	1.43019	0.000643379	chr19	+	2330044	2330063	19	99	120	100	80	40	85	0	0	0	0	0	0	SPPL2B	chr19:2330044-2330063
26044	2.57667	3.36397e-05	chr19	+	2331007	2331066	59	201	234	158	120	0	0	0	0	0	0	0	0	SPPL2B	chr19:2331007-2331066
26044	1.99757	0.000263016	chr19	+	2331187	2331246	59	212	275	152	204	0	16	0	1	0	2	0	1	SPPL2B	chr19:2331187-2331246
26045	2.59253	0.00018016	chr19	+	2333555	2333754	199	382	319	288	16	0	0	1	1	0	0	0	0	SPPL2B	chr19:2333555-2333754
26045	3.70408	6.02905e-05	chr19	+	2333775	2333874	99	156	662	322	92	0	0	1	1	1	0	0	0	SPPL2B	chr19:2333775-2333874
26045	2.29667	0.000155008	chr19	+	2333935	2334034	99	144	64	181	0	0	0	0	0	0	0	0	0	SPPL2B	chr19:2333935-2334034
26045	2.46112	3.47743e-05	chr19	+	2334055	2334274	219	430	415	291	0	73	0	0	2	0	0	0	0	SPPL2B	chr19:2334055-2334274
26045	3.66195	3.00707e-05	chr19	+	2334715	2335054	339	2004	1718	936	259	0	277	0	4	1	0	0	0	SPPL2B	chr19:2334715-2335054
26045	2.70055	8.29584e-05	chr19	+	2335115	2335234	119	168	366	89	0	4	0	0	0	0	0	0	0	SPPL2B	chr19:2335115-2335234
26046	2.35833	7.25592e-05	chr19	+	2337095	2337174	79	115	48	159	0	0	0	1	0	0	0	0	0	SPPL2B	chr19:2337095-2337174
26046	3.27922	2.56749e-05	chr19	+	2337215	2337474	259	469	926	847	33	111	0	1	1	0	0	0	0	SPPL2B	chr19:2337215-2337474
26046	3.27302	3.31155e-06	chr19	+	2337635	2337714	79	319	325	143	71	4	0	0	1	0	0	0	0	SPPL2B	chr19:2337635-2337714
26046	3.1861	0.00018103	chr19	+	2337975	2338174	199	478	959	527	88	118	0	0	0	1	0	0	0	SPPL2B	chr19:2337975-2338174
26046	2.4086	0.000195099	chr19	+	2338275	2338394	119	403	374	203	27	55	116	0	0	1	0	0	0	SPPL2B	chr19:2338275-2338394
26046	3.93472	0.000166016	chr19	+	2338535	2338774	239	812	980	305	0	0	0	2	2	0	0	0	0	SPPL2B	chr19:2338535-2338774
26046	3.23611	2.42022e-05	chr19	+	2338795	2338914	119	183	473	149	0	0	0	0	0	0	0	0	0	SPPL2B	chr19:2338795-2338914
26047	4.24961	6.05263e-05	chr19	+	2338957	2339116	159	1076	970	194	34	27	100	0	1	0	0	0	0	SPPL2B	chr19:2338957-2339116
26047	3.50329	9.53029e-05	chr19	+	2339237	2339956	719	2210	2423	2164	319	100	0	3	12	8	1	0	0	SPPL2B	chr19:2339237-2339956
26047	4.2638	2.34303e-05	chr19	+	2339977	2340256	279	937	1211	867	66	0	0	1	1	0	0	0	0	SPPL2B	chr19:2339977-2340256
26047	2.28873	0.000215906	chr19	+	2340317	2340376	59	148	256	66	60	44	0	0	0	0	0	0	0	SPPL2B	chr19:2340317-2340376
26047	5.31072	4.92777e-06	chr19	+	2340417	2340936	519	1995	3685	2522	0	289	0	9	10	6	0	2	0	SPPL2B	chr19:2340417-2340936
26047	4.22254	4.56155e-05	chr19	+	2341017	2341696	679	3240	4405	3284	683	242	137	17	17	11	0	2	1	SPPL2B	chr19:2341017-2341696
26048	3.78571	0.000269605	chr19	+	2342238	2342297	59	373	60	178	0	30	0	0	1	0	0	0	0	SPPL2B	chr19:2342238-2342297
26048	4.42692	8.61615e-06	chr19	+	2342658	2342917	259	952	1154	555	0	0	0	0	2	1	0	0	0	SPPL2B	chr19:2342658-2342917
26049	2.52833	1.79423e-06	chr19	+	2352223	2352422	199	241	362	306	0	0	0	1	0	1	0	0	0	SPPL2B	chr19:2352223-2352422
26049	3.70468	3.5243e-05	chr19	+	2352463	2353362	899	2230	2908	2421	0	0	80	2	2	6	0	0	0	SPPL2B	chr19:2352463-2353362
26049	4.42422	8.97947e-05	chr19	+	2353383	2354042	659	2364	3758	1858	272	0	11	2	7	4	0	0	0	SPPL2B	chr19:2353383-2354042
26049	4.39153	0.000211262	chr19	+	2354383	2354602	219	620	1371	661	96	0	0	0	2	0	0	0	0	SPPL2B	chr19:2354383-2354602
26049	2.66667	4.38774e-05	chr19	+	2354663	2354782	119	291	637	276	153	0	75	0	1	0	0	0	0	SPPL2B	chr19:2354663-2354782
26050	2.31535	0.000213153	chr19	+	2356109	2356228	119	277	304	175	0	33	89	0	0	0	0	0	0	SPPL2B	chr19:2356109-2356228
26050	3.20101	0.00018701	chr19	+	2356429	2356528	99	664	496	427	11	205	76	0	1	1	0	0	0	SPPL2B	chr19:2356429-2356528
26051	1.83333	0.000784936	chr19	+	2358229	2358268	39	108	132	76	40	40	40	1	0	0	0	0	0		chr19:2358229-2358268
26053	2.225	0.000442359	chr19	+	2396377	2396416	39	40	132	145	40	40	0	0	2	0	0	0	0	TMPRSS9	chr19:2396377-2396416
26053	2.64799	0.000190772	chr19	+	2396437	2396676	239	1113	942	683	206	288	99	3	4	3	2	0	0	TMPRSS9	chr19:2396437-2396676
26054	1.84965	0.000202688	chr19	+	2399037	2399176	139	504	909	767	485	344	153	0	2	0	2	0	0	TMPRSS9	chr19:2399037-2399176
26055	3.01865	3.63009e-06	chr19	+	2405389	2405488	99	1028	749	979	473	182	64	1	0	4	0	0	0	TMPRSS9	chr19:2405389-2405488
26056	1.80423	0.000138882	chr19	+	2408403	2408642	239	1685	3067	2264	1749	634	1186	1	2	3	2	0	1	TMPRSS9	chr19:2408403-2408642
26057	2.52164	0.000220693	chr19	+	2410111	2410230	119	115	277	355	79	0	0	0	0	0	0	0	0	TMPRSS9	chr19:2410111-2410230
26057	1.76727	0.000899094	chr19	+	2410651	2410690	39	73	213	80	0	40	115	0	0	0	0	0	0	TMPRSS9	chr19:2410651-2410690
26059	2.49249	0.000164827	chr19	+	2413655	2413914	259	838	708	815	267	55	155	1	2	0	2	0	0	TMPRSS9	chr19:2413655-2413914
26060	2.32299	0.000236642	chr19	+	2415623	2415782	159	463	604	462	124	131	131	0	3	0	0	1	0	TMPRSS9	chr19:2415623-2415782
26060	2.03627	0.000543072	chr19	+	2415823	2415862	39	116	120	37	29	4	40	0	0	0	0	0	0	TMPRSS9	chr19:2415823-2415862
26060	1.66333	0.000915865	chr19	+	2415963	2416002	39	122	160	97	141	14	21	0	0	0	1	0	0	TMPRSS9	chr19:2415963-2416002
26060	2.83577	9.4006e-05	chr19	+	2416383	2416662	279	1104	895	1022	372	151	7	1	1	4	0	0	0	TMPRSS9	chr19:2416383-2416662
26060	1.58881	0.000773387	chr19	+	2416783	2416822	39	163	265	101	77	79	135	0	1	0	0	0	0	TMPRSS9	chr19:2416783-2416822
26060	1.98442	0.000210704	chr19	+	2416843	2416922	79	352	685	247	179	283	68	0	0	1	0	0	0	TMPRSS9	chr19:2416843-2416922
26061	2.98396	0.000261575	chr19	+	2422004	2422163	159	715	1491	461	127	211	242	2	2	0	0	0	0	TMPRSS9	chr19:2422004-2422163
26061	1.7479	0.000230843	chr19	+	2422224	2422263	39	117	300	291	63	118	175	0	0	1	0	0	0	TMPRSS9	chr19:2422224-2422263
26062	4.43675	0.000167318	chr19	+	2423594	2423773	179	298	1485	619	108	0	16	0	1	0	0	0	0	TMPRSS9	chr19:2423594-2423773
26062	4.21934	2.50323e-05	chr19	+	2423954	2424273	319	768	1382	1082	0	21	22	0	5	5	0	0	0	TMPRSS9	chr19:2423954-2424273
26062	2.09434	0.000530542	chr19	+	2424314	2424373	59	129	139	103	0	0	85	1	0	0	0	0	0	TMPRSS9	chr19:2424314-2424373
26062	3.90559	2.66812e-06	chr19	+	2424394	2424473	79	343	357	157	46	0	0	4	0	1	0	0	0	TMPRSS9	chr19:2424394-2424473
26062	4.73236	1.48529e-05	chr19	+	2424574	2424893	319	1801	2307	1403	183	157	71	1	7	1	0	1	0	TMPRSS9	chr19:2424574-2424893
26062	3.96154	6.28893e-05	chr19	+	2425094	2425233	139	430	395	490	0	0	22	1	1	2	0	0	0	TMPRSS9	chr19:2425094-2425233
26063	3.94091	6.25954e-05	chr19	+	2425326	2425925	599	2643	3703	2911	305	416	301	3	13	4	0	1	0	TMPRSS9	chr19:2425326-2425925
26063	2.48806	0.000259735	chr19	+	2425966	2426025	59	206	428	124	42	0	155	0	0	0	0	0	0	TMPRSS9	chr19:2425966-2426025
26063	2.78312	0.000255393	chr19	+	2426086	2426245	159	596	1146	375	213	0	243	0	1	1	0	0	0	TMPRSS9	chr19:2426086-2426245
26063	2.31511	9.69965e-05	chr19	+	2426286	2426505	219	1243	1650	932	190	453	632	0	1	0	0	0	1	TMPRSS9	chr19:2426286-2426505
26063	3.16616	8.98495e-05	chr19	+	2426526	2426885	359	2016	2383	1754	720	105	382	2	0	0	0	0	0	TMPRSS9	chr19:2426526-2426885
26063	1.71037	0.000577795	chr19	+	2426986	2427025	39	87	244	110	94	40	74	0	0	0	0	0	0	TMPRSS9	chr19:2426986-2427025
26063	2.92437	0.00025027	chr19	+	2427086	2427165	79	154	473	177	75	38	0	0	0	0	1	0	0	TMPRSS9	chr19:2427086-2427165
26063	2.10105	0.000164373	chr19	+	2427326	2427445	119	433	410	590	314	14	169	1	0	3	1	0	0	TMPRSS9	chr19:2427326-2427445
26063	2.89819	5.78817e-05	chr19	+	2427486	2427665	179	714	1047	737	172	5	334	0	1	1	0	0	0	TMPRSS9	chr19:2427486-2427665
26063	3.28557	8.61356e-06	chr19	+	2427686	2427805	119	727	1403	815	0	286	366	0	4	1	0	0	0	TMPRSS9	chr19:2427686-2427805
26063	2.57631	0.000145715	chr19	+	2427886	2427965	79	231	432	372	71	168	19	0	0	2	0	0	0	TMPRSS9	chr19:2427886-2427965
26063	1.65781	0.000105063	chr19	+	2428006	2428025	19	82	233	120	35	153	53	1	0	0	0	0	0	TMPRSS9	chr19:2428006-2428025
26063	1.5583	0.00047399	chr19	+	2428646	2428685	39	120	291	164	110	80	136	0	0	0	0	0	0		chr19:2428646-2428685
26063	1.59278	0.000660773	chr19	+	2428826	2428845	19	49	99	93	4	60	70	0	0	2	0	0	0		chr19:2428826-2428845
26063	1.45377	0.000547346	chr19	+	2429286	2429345	59	227	445	335	275	346	21	1	0	1	0	0	0		chr19:2429286-2429345
26063	1.23333	0.000989001	chr19	+	2429706	2429725	19	120	120	140	100	100	100	0	1	0	0	0	0		chr19:2429706-2429725
26064	2.94941	8.77418e-05	chr19	+	2437958	2438137	179	716	968	512	83	154	152	0	0	1	0	0	0		chr19:2437958-2438137
26064	2.55272	7.7384e-05	chr19	+	2438178	2438317	139	311	298	464	96	0	72	0	0	2	0	0	0		chr19:2438178-2438317
26064	3.08977	2.26667e-05	chr19	+	2438558	2438697	139	326	640	323	26	0	107	0	3	0	0	0	1		chr19:2438558-2438697
26064	2.51333	0.000231819	chr19	+	2438718	2438817	99	56	189	189	0	0	0	0	3	2	0	0	0		chr19:2438718-2438817
26065	3.68499	4.93191e-05	chr19	+	2443776	2444495	719	2550	3001	2508	39	122	463	4	2	4	0	0	0		chr19:2443776-2444495
26065	2.35816	0.000113401	chr19	+	2444536	2444655	119	655	486	494	142	240	104	0	0	0	0	0	0		chr19:2444536-2444655
26065	2.727	0.000179253	chr19	+	2444676	2444995	319	383	691	655	0	0	29	0	1	1	0	0	0		chr19:2444676-2444995
26065	2.50894	5.22986e-05	chr19	+	2445036	2445215	179	319	412	260	0	0	71	0	2	1	0	0	1		chr19:2445036-2445215
26065	2.29444	0.000211659	chr19	+	2445416	2445475	59	126	107	0	0	0	0	0	0	0	0	0	0		chr19:2445416-2445475
26066	2.08065	0.00026727	chr19	+	2476016	2476095	79	146	80	50	0	8	0	0	0	0	0	0	0	GADD45B	chr19:2476016-2476095
26066	1.66557	7.23184e-05	chr19	+	2476436	2477495	1059	29607	26919	20235	23191	11866	9889	52	45	22	19	14	6	GADD45B	chr19:2476436-2477495
26066	0.959545	0.000340809	chr19	+	2477776	2477895	119	6481	5718	4178	6657	6313	4159	8	4	2	1	2	0	GADD45B	chr19:2477776-2477895
26066	0.949031	0.000314664	chr19	+	2477936	2478035	99	5694	6045	4394	7429	4954	4742	13	18	13	8	6	5	GADD45B	chr19:2477936-2478035
26066	1.72345	0.000112184	chr19	+	2478276	2478455	179	2428	3277	2482	1443	2030	1044	15	23	16	13	12	8	GADD45B	chr19:2478276-2478455
26066	1.88156	0.000173794	chr19	+	2478536	2478735	199	2909	2288	2082	1322	915	1372	4	5	3	1	0	0	GADD45B	chr19:2478536-2478735
26066	2.10326	0.000453851	chr19	+	2479016	2479095	79	205	153	160	80	44	0	2	0	2	1	0	0	GADD45B	chr19:2479016-2479095
26070	1.70417	0.000768446	chr19	+	2813024	2813103	79	23	73	73	0	0	0	0	0	0	0	0	0	THOP1	chr19:2813024-2813103
10405	1.83171	0.000223596	chr19	-	3612216	3612375	159	1129	897	694	529	449	289	0	0	0	0	0	0	C19orf29	chr19:3612216-3612375
10405	2.62963	0.000295426	chr19	-	3612396	3612435	39	44	190	143	69	0	0	0	0	0	0	0	0	C19orf29	chr19:3612396-3612435
10406	2.7	2.57216e-05	chr19	-	3619662	3619721	59	186	60	60	0	0	0	0	0	0	0	0	0	C19orf29	chr19:3619662-3619721
10406	2.45	0.000113837	chr19	-	3619902	3620001	99	68	275	92	0	0	0	0	0	0	0	0	0	C19orf29	chr19:3619902-3620001
10406	2.05556	0.000305181	chr19	-	3620022	3620141	119	30	194	156	0	0	0	0	0	0	0	0	0	C19orf29	chr19:3620022-3620141
10409	2.22667	8.85323e-05	chr19	-	3627121	3627220	99	193	83	92	0	0	0	0	0	0	0	0	0	C19orf29	chr19:3627121-3627220
10411	2.59487	1.43289e-05	chr19	-	3759858	3759917	59	60	160	106	15	0	0	0	0	0	0	0	0	APBA3	chr19:3759858-3759917
10412	2.52994	0.000116006	chr19	-	3958280	3958359	79	183	215	199	43	0	51	0	1	1	0	0	0	DAPK3	chr19:3958280-3958359
10412	1.12446	0.000887131	chr19	-	3958820	3958839	19	160	219	85	285	81	40	0	0	0	0	0	0	DAPK3	chr19:3958820-3958839
10412	1.93737	0.000378315	chr19	-	3959040	3959099	59	333	298	148	315	0	0	0	0	0	0	0	0	DAPK3	chr19:3959040-3959099
10412	3.69103	3.80735e-05	chr19	-	3959120	3959199	79	271	460	140	61	0	0	0	0	0	0	0	0	DAPK3	chr19:3959120-3959199
10412	2.23729	0.00037935	chr19	-	3959240	3959279	39	143	167	98	112	0	0	0	0	0	1	0	0	DAPK3	chr19:3959240-3959279
10412	1.62141	0.00014377	chr19	-	3959380	3959419	39	389	262	228	314	98	94	1	1	2	0	0	0	DAPK3	chr19:3959380-3959419
10412	2.43293	9.13217e-05	chr19	-	3959640	3959679	39	125	80	70	0	0	40	0	1	0	0	0	1	MIR637 DAPK3	chr19:3959640-3959679
10412	1.86667	0.00049587	chr19	-	3959800	3959859	59	60	32	60	0	0	0	0	1	0	0	0	0	MIR637 DAPK3	chr19:3959800-3959859
10413	2.37742	5.36319e-05	chr19	-	3961111	3961270	159	1081	1782	945	919	301	107	0	0	2	0	0	0	MIR637 DAPK3	chr19:3961111-3961270
10414	3.32723	8.03706e-05	chr19	-	3963293	3963492	199	858	649	765	0	36	238	3	5	1	0	0	0	MIR637 DAPK3	chr19:3963293-3963492
10414	1.7655	0.000486469	chr19	-	3963513	3963572	59	127	365	235	180	60	92	0	0	1	1	0	0	DAPK3	chr19:3963513-3963572
10414	2.34091	0.000222069	chr19	-	3964013	3964072	59	48	174	109	0	39	1	0	1	0	0	0	0	DAPK3	chr19:3964013-3964072
10415	1.06172	0.000651426	chr19	-	3964677	3964716	39	448	547	408	656	320	346	0	0	2	0	0	0	DAPK3	chr19:3964677-3964716
10417	1.51938	0.000422364	chr19	-	3975929	3975988	59	346	419	223	332	126	136	1	0	1	0	0	0	EEF2	chr19:3975929-3975988
10417	2.35357	3.16989e-05	chr19	-	3976749	3976788	39	170	256	113	120	0	40	0	0	0	0	0	0	EEF2	chr19:3976749-3976788
10417	1.40741	0.000930092	chr19	-	3977369	3977388	19	113	93	72	103	60	20	1	0	0	0	0	0	EEF2	chr19:3977369-3977388
10417	2.02301	6.6458e-05	chr19	-	3977609	3977808	199	3050	3184	1833	2202	721	771	5	1	3	1	1	0	EEF2	chr19:3977609-3977808
10417	1.26106	0.000421073	chr19	-	3979289	3979328	39	332	517	196	152	362	293	0	1	0	0	0	0	EEF2	chr19:3979289-3979328
10417	0.977612	0.000777517	chr19	-	3979349	3979368	19	302	315	228	250	344	284	0	3	0	0	0	0	EEF2	chr19:3979349-3979368
10417	1.37677	0.000280539	chr19	-	3979429	3979568	139	1612	2087	2008	2042	744	1241	0	1	2	0	0	3	EEF2	chr19:3979429-3979568
10417	1.71799	3.4825e-05	chr19	-	3979589	3979828	239	7065	7393	5118	5548	3066	2463	8	10	4	12	3	2	EEF2	chr19:3979589-3979828
10417	1.59595	6.30623e-05	chr19	-	3980129	3980348	219	3030	3367	2102	2667	995	1440	4	6	4	2	0	1	EEF2	chr19:3980129-3980348
10417	1.35616	0.000381663	chr19	-	3980409	3980468	59	613	367	515	297	356	408	0	0	2	0	0	0	EEF2	chr19:3980409-3980468
10417	1.77534	0.000103519	chr19	-	3980709	3980788	79	751	579	524	576	0	368	1	0	1	0	0	0	EEF2 SNORD37	chr19:3980709-3980788
10417	2.22141	0.000140417	chr19	-	3981049	3981308	259	1437	1035	1317	885	399	0	2	1	1	0	0	0	EEF2 SNORD37	chr19:3981049-3981308
10417	1.89236	0.000211014	chr19	-	3981829	3981928	99	459	481	387	560	0	0	0	1	1	1	0	0	EEF2 SNORD37	chr19:3981829-3981928
10417	3.34783	0.000609189	chr19	-	3982089	3982108	19	40	116	165	15	20	20	0	0	1	0	0	0	EEF2 SNORD37	chr19:3982089-3982108
10417	1.70072	0.000442677	chr19	-	3982689	3982788	99	595	511	259	385	211	79	0	0	0	0	1	0	EEF2 SNORD37	chr19:3982689-3982788
10417	1.31088	0.00020712	chr19	-	3983589	3983648	59	915	653	420	763	240	480	2	0	1	0	0	0	EEF2 SNORD37	chr19:3983589-3983648
10417	1.19529	0.00027301	chr19	-	3984009	3984128	119	1909	1826	1106	2172	917	925	4	2	2	1	0	0	EEF2 SNORD37	chr19:3984009-3984128
10417	1.85028	0.000256094	chr19	-	3984349	3984428	79	416	366	284	253	192	23	0	0	1	0	0	0	EEF2 SNORD37	chr19:3984349-3984428
10418	2.2053	4.54197e-05	chr19	-	4090691	4090790	99	107	100	155	2	0	0	0	0	1	0	0	0	MAP2K2	chr19:4090691-4090790
10423	2.07789	0.000203366	chr19	-	4446373	4446432	59	284	158	201	101	35	82	0	0	1	0	0	0	UBXN6	chr19:4446373-4446432
10423	2.12342	0.000313378	chr19	-	4446813	4446872	59	170	122	199	132	0	0	0	0	0	1	0	0	UBXN6	chr19:4446813-4446872
10425	1.24066	0.000813962	chr19	-	4502552	4502591	39	298	314	161	443	80	80	0	0	1	0	0	0	PLIN4	chr19:4502552-4502591
10425	1.05392	0.000972767	chr19	-	4502852	4502871	19	255	168	154	236	190	126	1	1	0	0	0	0	PLIN4	chr19:4502852-4502871
10425	1.1977	0.000707056	chr19	-	4502892	4502911	19	120	204	137	140	140	95	0	0	0	0	0	0	PLIN4	chr19:4502892-4502911
10425	1.63423	0.000386944	chr19	-	4502932	4503011	79	357	550	247	364	134	111	0	0	0	1	0	0	PLIN4	chr19:4502932-4503011
10426	1.37143	0.000633988	chr19	-	4510801	4510840	39	231	274	183	243	182	50	0	0	2	0	0	0	PLIN4	chr19:4510801-4510840
10426	1.48952	0.000506655	chr19	-	4510901	4510960	59	344	340	344	351	177	103	0	0	0	0	0	0	PLIN4	chr19:4510901-4510960
10426	1.46429	0.00076691	chr19	-	4512261	4512280	19	79	140	45	57	61	46	1	0	0	0	0	0	PLIN4	chr19:4512261-4512280
10426	1.35255	0.000251573	chr19	-	4513541	4513700	159	1983	2028	904	2305	647	562	18	16	7	16	7	6	PLIN4	chr19:4513541-4513700
10427	2.01075	0.000480618	chr19	-	4517702	4517741	39	199	74	168	39	40	80	0	0	0	0	0	0	PLIN4	chr19:4517702-4517741
10427	1.9124	0.00015142	chr19	-	4518222	4518321	99	496	817	588	291	313	249	0	1	0	0	0	0	PLIN4	chr19:4518222-4518321
10427	3.27	1.72315e-07	chr19	-	4518422	4518521	99	281	221	179	0	0	0	0	0	0	0	0	0	PLIN4	chr19:4518422-4518521
10427	2.1742	0.000140873	chr19	-	4518642	4518761	119	860	1037	668	327	254	408	1	1	0	0	0	0	PLIN4	chr19:4518642-4518761
10429	1.34737	0.000913267	chr19	-	4521161	4521180	19	151	73	100	100	80	45	0	0	0	0	0	0	PLIN5	chr19:4521161-4521180
10429	1.09158	0.000661523	chr19	-	4522461	4522520	59	504	837	561	947	160	612	0	0	1	2	0	1	PLIN5	chr19:4522461-4522520
10429	2.26242	7.31203e-05	chr19	-	4523401	4523540	139	2989	2786	1322	1137	933	844	2	7	2	2	0	0	PLIN5	chr19:4523401-4523540
10429	3.34783	4.30609e-05	chr19	-	4523761	4523840	79	270	253	80	5	8	0	0	1	0	0	0	0	PLIN5	chr19:4523761-4523840
10429	2.89722	0.00011958	chr19	-	4524041	4524180	139	1362	623	696	249	149	262	1	3	3	0	0	0	PLIN5	chr19:4524041-4524180
10430	2.35775	0.000359987	chr19	-	4525638	4525777	139	512	589	990	242	247	152	0	0	0	0	1	0	PLIN5	chr19:4525638-4525777
10431	2.1283	5.62496e-06	chr19	-	4529119	4529218	99	1051	1585	1249	1202	194	272	1	1	1	0	0	1	PLIN5	chr19:4529119-4529218
10433	3.60648	7.33674e-06	chr19	-	4531666	4531765	99	513	488	245	38	94	0	1	1	1	0	0	0	PLIN5	chr19:4531666-4531765
26090	1.6341	0.000173728	chr19	+	4910950	4911029	79	631	562	466	504	419	0	1	1	0	0	1	0	UHRF1	chr19:4910950-4911029
26092	2.93109	3.7446e-05	chr19	+	5016385	5016524	139	453	533	500	98	0	135	1	1	0	0	0	0	KDM4B	chr19:5016385-5016524
26093	2.21778	0.000364172	chr19	+	5033357	5033416	59	145	43	131	24	21	0	0	0	0	0	0	0	KDM4B	chr19:5033357-5033416
26094	2.52032	9.06127e-06	chr19	+	5033650	5033749	99	541	1230	770	348	282	202	1	1	1	0	0	0	KDM4B	chr19:5033650-5033749
26096	3.36306	4.35413e-05	chr19	+	5036366	5036505	139	590	549	549	99	109	0	0	1	0	0	0	0	KDM4B	chr19:5036366-5036505
26096	2.62312	0.000153019	chr19	+	5037446	5037505	59	114	175	53	19	0	0	0	0	0	0	0	0	KDM4B	chr19:5037446-5037505
26096	2.55267	0.000142955	chr19	+	5038006	5038125	119	285	608	609	74	184	113	0	1	0	0	0	0	KDM4B	chr19:5038006-5038125
26096	2.1747	0.000269007	chr19	+	5039086	5039145	59	108	263	171	0	60	92	0	0	0	0	0	0	KDM4B	chr19:5039086-5039145
26096	2.1875	0.000312363	chr19	+	5039566	5039625	59	170	117	58	60	0	0	0	0	0	0	0	0	KDM4B	chr19:5039566-5039625
26097	2.74815	4.65428e-05	chr19	+	5047771	5047950	179	505	221	218	0	0	0	0	0	0	0	0	0	KDM4B	chr19:5047771-5047950
26100	2.03209	0.000533894	chr19	+	5131159	5131198	39	120	100	40	27	40	0	0	0	0	0	0	0	KDM4B	chr19:5131159-5131198
26101	1.73606	0.000956163	chr19	+	5152600	5152639	39	120	107	120	109	0	40	0	0	0	0	0	0	KDM4B	chr19:5152600-5152639
26109	2.17248	0.000166512	chr19	+	5704121	5704200	79	298	421	217	87	144	74	1	1	0	0	0	0		chr19:5704121-5704200
26110	3.37705	9.30335e-06	chr19	+	5707265	5707344	79	220	297	63	3	1	0	1	0	0	0	0	0		chr19:5707265-5707344
26110	2.00679	0.000261664	chr19	+	5707445	5707524	79	377	339	226	196	153	0	0	0	0	0	0	0		chr19:5707445-5707524
26116	3.43017	4.22588e-05	chr19	+	6531245	6531964	719	10811	9216	9238	2508	2922	1609	23	9	14	1	1	2	TNFSF9	chr19:6531245-6531964
26116	2.52392	0.000207784	chr19	+	6532065	6532124	59	277	481	117	60	0	178	0	0	0	0	0	0	TNFSF9	chr19:6532065-6532124
26116	1.69981	0.000320428	chr19	+	6532165	6532304	139	783	889	544	452	538	165	5	4	3	1	0	0	TNFSF9	chr19:6532165-6532304
26117	2.4125	0.000204926	chr19	+	6534522	6534601	79	153	160	26	0	0	0	0	0	0	0	0	0	TNFSF9	chr19:6534522-6534601
26117	0.967456	0.000934189	chr19	+	6534662	6534701	39	568	570	365	888	482	200	1	2	0	0	0	0	TNFSF9	chr19:6534662-6534701
10481	2.19475	0.000201432	chr19	-	6752421	6752580	159	1124	782	933	431	345	265	4	2	1	0	0	1	SH2D3A	chr19:6752421-6752580
10482	1.2628	0.000324454	chr19	-	6755031	6755110	79	796	866	1034	1253	350	493	3	1	2	2	0	0	SH2D3A	chr19:6755031-6755110
10482	1.89938	0.00014003	chr19	-	6755171	6755250	79	330	820	429	274	305	145	0	3	0	0	0	0	SH2D3A	chr19:6755171-6755250
26128	1.89722	0.000555958	chr19	+	7676673	7676732	59	233	210	60	180	0	0	0	0	0	0	0	0	CAMSAP3	chr19:7676673-7676732
26128	2.27778	0.000193654	chr19	+	7676813	7676932	119	0	246	214	0	0	0	0	0	0	0	0	0	CAMSAP3	chr19:7676813-7676932
26128	2.31111	0.000111266	chr19	+	7677833	7678012	179	404	168	324	86	0	0	1	2	2	1	0	0	CAMSAP3	chr19:7677833-7678012
10485	2.18333	0.000265552	chr19	-	7685047	7685146	99	180	175	0	0	0	0	0	0	0	0	0	0	XAB2	chr19:7685047-7685146
10488	1.32745	0.000555189	chr19	-	7998778	7998837	59	454	485	231	480	180	180	0	1	0	0	0	0	TIMM44	chr19:7998778-7998837
26139	1.95556	0.000360452	chr19	+	8464258	8464497	239	265	324	91	0	0	0	2	0	0	0	0	0	RAB11B	chr19:8464258-8464497
26140	1.63884	0.000321636	chr19	+	8468357	8468456	99	516	616	417	696	85	53	1	1	2	1	0	0	RAB11B	chr19:8468357-8468456
26140	3.02222	7.22905e-08	chr19	+	8468717	8468776	59	139	60	161	0	0	0	0	0	1	0	0	0	RAB11B	chr19:8468717-8468776
26140	2.18889	0.000295112	chr19	+	8468957	8469016	59	116	0	98	0	0	0	0	0	0	0	0	0	RAB11B	chr19:8468957-8469016
26141	1.97756	0.000504831	chr19	+	8503208	8503267	59	112	353	144	207	14	0	0	0	1	0	0	0	2014-03-02	chr19:8503208-8503267
26147	1.1601	0.000252175	chr19	+	8550906	8551005	99	1721	1885	1218	2313	1007	805	3	2	2	2	0	2	HNRNPM	chr19:8550906-8551005
26148	1.86946	0.000531339	chr19	+	8553280	8553339	59	141	208	230	79	72	75	0	0	0	0	0	0	HNRNPM	chr19:8553280-8553339
26161	1.4254	0.000795652	chr19	+	10221775	10221814	39	204	196	175	219	90	67	1	2	0	0	0	0	SNORD105B PPAN PPAN-P2RY11 P2RY11	chr19:10221775-10221814
26162	1.43561	0.000635948	chr19	+	10225592	10225651	59	278	360	303	212	340	60	1	2	1	0	0	0	PPAN-P2RY11 P2RY11	chr19:10225592-10225651
10521	1.45197	0.000353203	chr19	-	10251537	10251576	39	298	273	231	289	174	40	0	0	0	2	1	0	DNMT1	chr19:10251537-10251576
10523	2.56667	0.000100084	chr19	-	10254671	10254750	79	175	53	148	0	0	0	0	0	0	0	0	0	DNMT1	chr19:10254671-10254750
10530	1.88685	0.000235925	chr19	-	10439406	10439565	159	759	669	957	603	174	272	2	0	3	0	0	0	RAVER1	chr19:10439406-10439565
10530	2.14	0.000283924	chr19	-	10439986	10440025	39	148	120	40	0	40	40	0	0	0	0	0	0	RAVER1	chr19:10439986-10440025
10533	3.64273	1.33377e-05	chr19	-	10446314	10446453	139	546	652	411	80	43	14	0	0	0	0	0	0	ICAM3	chr19:10446314-10446453
10535	1.9454	0.000352303	chr19	-	10463572	10463651	79	230	563	313	307	149	0	0	1	1	0	0	0	TYK2	chr19:10463572-10463651
10535	1.60486	0.000350089	chr19	-	10463672	10463711	39	117	306	184	109	197	19	0	0	0	0	2	0	TYK2	chr19:10463672-10463711
10535	2.17247	0.000253822	chr19	-	10463732	10463831	99	158	472	313	35	199	40	0	1	0	0	0	0	TYK2	chr19:10463732-10463831
10535	2.65	5.04707e-05	chr19	-	10463872	10464031	159	234	311	235	0	0	0	0	3	0	0	0	0	TYK2	chr19:10463872-10464031
10535	2.18333	4.31142e-05	chr19	-	10464052	10464131	79	64	76	140	0	0	0	0	0	1	0	0	0	TYK2	chr19:10464052-10464131
10536	2.15789	0.00028775	chr19	-	10464329	10464388	59	108	46	76	10	0	0	0	0	0	0	0	0	TYK2	chr19:10464329-10464388
10536	1.25	0.000928137	chr19	-	10464769	10464788	19	88	192	70	87	102	79	0	0	0	0	0	0	TYK2	chr19:10464769-10464788
10538	2.13333	0.000443392	chr19	-	10475198	10475357	159	159	72	305	0	0	0	0	0	2	0	0	0	TYK2	chr19:10475198-10475357
10545	1.99777	7.97239e-05	chr19	-	10664639	10664758	119	1688	1782	1544	1353	720	263	0	2	1	0	0	0	KRI1	chr19:10664639-10664758
10545	1.08863	0.000895837	chr19	-	10664839	10664858	19	173	168	250	153	191	194	0	0	0	0	0	0	KRI1	chr19:10664839-10664858
10546	1.2474	0.000596712	chr19	-	10668333	10668432	99	690	860	783	967	352	487	1	0	0	1	1	0	KRI1	chr19:10668333-10668432
10547	1.05179	0.000698561	chr19	-	10670146	10670185	39	359	642	317	325	471	455	0	1	0	0	0	0	KRI1	chr19:10670146-10670185
10547	3.43164	1.49282e-05	chr19	-	10670286	10670365	79	444	279	317	57	76	0	0	0	0	0	0	0	KRI1	chr19:10670286-10670365
10547	2.64345	0.000147892	chr19	-	10670526	10670605	79	838	367	445	365	113	0	0	2	0	0	0	0	KRI1	chr19:10670526-10670605
26183	1.45674	0.00028756	chr19	+	10828859	10828978	119	1306	1350	1481	1539	758	448	2	4	2	1	0	0	MIR638 DNM2	chr19:10828859-10828978
26184	1.22831	0.000612109	chr19	+	10883233	10883272	39	319	292	337	361	157	234	0	1	1	0	0	1	DNM2	chr19:10883233-10883272
26186	1.38227	0.000119708	chr19	+	10887812	10887891	79	1219	982	1044	1591	314	374	2	0	0	2	0	0	DNM2	chr19:10887812-10887891
26189	1.17199	0.00058029	chr19	+	10904436	10904475	39	405	305	488	631	120	257	1	0	0	0	0	0	DNM2	chr19:10904436-10904475
26192	1.36398	0.000188678	chr19	+	10940898	10940957	59	450	984	558	999	114	317	1	1	4	0	0	0	DNM2	chr19:10940898-10940957
26197	3.03684	1.11413e-05	chr19	+	11039923	11039982	59	217	118	62	10	0	0	0	0	0	0	0	0	C19orf52	chr19:11039923-11039982
26197	1.40132	0.000491024	chr19	+	11040103	11040122	19	112	151	99	131	60	53	0	1	0	0	0	0	C19orf52	chr19:11040103-11040122
26198	2.25	8.29585e-06	chr19	+	11095063	11095142	79	73	80	147	0	0	0	0	0	0	0	0	0	SMARCA4	chr19:11095063-11095142
26200	2.14211	0.000328533	chr19	+	11100146	11100205	59	108	67	52	0	6	4	0	0	0	0	0	0	SMARCA4	chr19:11100146-11100205
26208	1.74333	0.00060371	chr19	+	11145476	11145575	99	98	25	100	0	0	0	0	0	0	0	0	0	SMARCA4	chr19:11145476-11145575
26214	1.79439	0.000428549	chr19	+	11213463	11213502	39	138	110	196	81	40	80	1	1	1	0	0	0	LDLR	chr19:11213463-11213502
26214	2.38723	9.47083e-05	chr19	+	11213523	11213622	99	306	293	293	4	100	97	0	1	0	0	0	0	LDLR	chr19:11213523-11213622
10565	1.14516	0.000597242	chr19	-	11489147	11489166	19	253	188	138	278	160	60	0	0	0	0	0	0	EPOR	chr19:11489147-11489166
10589	1.90417	0.000222994	chr19	-	12721767	12721846	79	77	74	66	0	0	0	0	0	0	0	0	0	ZNF490	chr19:12721767-12721846
26250	1.7375	0.000574103	chr19	+	12755008	12755087	79	24	74	75	0	0	0	1	0	0	0	0	0		chr19:12755008-12755087
26250	1.91264	0.000677032	chr19	+	12755388	12755467	79	157	303	132	78	0	117	0	0	0	0	0	0		chr19:12755388-12755467
10592	1.88333	0.000351277	chr19	-	12776008	12776067	59	60	58	41	0	0	0	0	0	0	0	0	0	MAN2B1	chr19:12776008-12776067
26253	1.40411	0.000625125	chr19	+	12792652	12792691	39	278	159	263	199	185	80	0	0	0	0	0	0		chr19:12792652-12792691
10602	1.61972	0.000374104	chr19	-	12814265	12814284	19	60	148	65	76	60	17	2	0	1	0	0	0	TNPO2	chr19:12814265-12814284
10602	2.14167	0.000421755	chr19	-	12814545	12814604	59	94	180	60	0	0	60	0	0	0	0	0	0	TNPO2	chr19:12814545-12814604
26258	1.18019	0.000444006	chr19	+	12903060	12903139	79	1045	826	629	710	910	478	2	4	0	0	1	0	JUNB	chr19:12903060-12903139
26263	1.38077	0.000273753	chr19	+	13002667	13002706	39	365	403	177	287	245	128	2	1	0	0	0	0	GCDH	chr19:13002667-13002706
26264	1.45755	0.000989602	chr19	+	13004489	13004508	19	113	96	40	112	20	20	0	0	0	0	0	0	GCDH	chr19:13004489-13004508
26264	1.69648	3.31574e-05	chr19	+	13006809	13006908	99	1228	1346	1639	1359	551	446	0	1	4	4	0	0	GCDH	chr19:13006809-13006908
26264	1.41241	0.00030322	chr19	+	13007189	13007228	39	299	349	248	288	110	207	0	1	1	0	0	0	GCDH	chr19:13007189-13007228
26264	2.98695	1.25753e-05	chr19	+	13007309	13007568	259	2235	2251	2022	814	461	397	3	2	4	0	0	0	GCDH	chr19:13007309-13007568
26264	1.86176	0.000391969	chr19	+	13007949	13008068	119	426	573	482	345	72	214	1	0	0	0	0	0	GCDH	chr19:13007949-13008068
26264	1.2306	0.000473273	chr19	+	13008949	13009028	79	692	1302	497	600	812	590	3	4	0	0	0	0	GCDH	chr19:13008949-13009028
26270	1.84766	0.000650061	chr19	+	13039166	13039225	59	345	274	143	309	23	0	1	0	0	0	0	0		chr19:13039166-13039225
26270	3.577	4.24403e-07	chr19	+	13039346	13039445	99	489	531	507	121	0	88	0	2	0	0	0	1		chr19:13039346-13039445
26271	1.02198	0.000354945	chr19	+	13049609	13049688	79	1780	2257	1433	2451	979	1948	6	5	3	5	0	1	CALR	chr19:13049609-13049688
26271	0.833697	0.000991423	chr19	+	13049809	13049828	19	599	551	311	759	733	278	0	1	1	1	0	0	CALR	chr19:13049809-13049828
26274	2.09896	0.000203023	chr19	+	13056504	13056603	99	581	361	354	341	100	27	2	2	0	0	0	0	RAD23A CALR	chr19:13056504-13056603
26281	2.38819	9.09602e-06	chr19	+	13264099	13264998	899	16878	17043	14636	8538	4715	5533	23	26	27	9	3	14	IER2	chr19:13264099-13264998
26281	2.02692	0.000255548	chr19	+	13266339	13266418	79	332	257	217	55	74	151	1	0	1	0	0	0	IER2	chr19:13266339-13266418
26281	1.99765	0.000311519	chr19	+	13266799	13266858	59	282	265	120	186	60	0	0	1	0	0	0	0	IER2	chr19:13266799-13266858
26281	2.58288	8.41425e-05	chr19	+	13266939	13267038	99	200	592	318	70	122	57	1	1	0	0	0	0	IER2	chr19:13266939-13267038
26282	2.93713	3.85493e-05	chr19	+	13873666	13873745	79	357	187	189	94	0	0	2	0	0	0	0	0	MRI1 CCDC130	chr19:13873666-13873745
26285	3.64706	8.92617e-05	chr19	+	14117071	14117170	99	322	383	235	0	0	40	0	0	0	0	0	0		chr19:14117071-14117170
26285	1.39489	0.000448378	chr19	+	14117451	14117470	19	207	147	73	139	73	80	0	1	0	0	0	0		chr19:14117451-14117470
26285	2.08581	0.000425603	chr19	+	14117571	14117630	59	572	285	219	205	94	127	0	1	1	0	0	0		chr19:14117571-14117630
26285	2.88773	0.000139591	chr19	+	14117771	14117890	119	376	203	163	19	0	4	1	0	0	0	0	0		chr19:14117771-14117890
10641	1.83588	0.000623759	chr19	-	14628315	14628354	39	120	149	80	74	40	28	1	2	0	0	0	0	DNAJB1	chr19:14628315-14628354
10641	1.65934	0.00053884	chr19	-	14628395	14628414	19	120	71	51	60	42	20	0	0	0	0	0	0	DNAJB1	chr19:14628395-14628414
10650	1.65797	0.00067109	chr19	-	15375243	15375282	39	108	184	160	32	193	0	0	0	0	0	0	0	BRD4	chr19:15375243-15375282
10650	1.24338	0.000580238	chr19	-	15375463	15375542	79	403	755	524	596	253	460	0	1	0	0	0	0	BRD4	chr19:15375463-15375542
10653	2.58096	0.000157545	chr19	-	15483749	15484108	359	1409	1466	1903	740	285	174	2	1	3	0	0	0	AKAP8	chr19:15483749-15484108
10654	2.15185	0.000380531	chr19	-	15508962	15509021	59	118	171	108	0	90	0	0	1	0	0	0	0	AKAP8L	chr19:15508962-15509021
10654	2.24865	0.00013739	chr19	-	15509102	15509161	59	60	127	49	3	2	0	0	0	0	0	0	0	AKAP8L	chr19:15509102-15509161
10654	3	4.45283e-05	chr19	-	15509542	15509601	59	199	109	48	0	0	0	1	0	0	0	0	0	AKAP8L	chr19:15509542-15509601
10654	2.0442	0.000327679	chr19	-	15509902	15509961	59	54	26	110	0	1	0	0	0	0	0	0	0	AKAP8L	chr19:15509902-15509961
26309	2.52193	0.000123826	chr19	+	16314065	16314124	59	102	162	127	23	25	0	0	0	1	0	0	0	AP1M1	chr19:16314065-16314124
26310	2.05833	0.000247384	chr19	+	16319518	16319557	39	80	140	154	0	80	40	0	0	0	0	0	0	AP1M1	chr19:16319518-16319557
10661	1.74659	0.000360606	chr19	-	16629739	16629878	139	628	803	447	448	246	204	1	0	0	0	0	0	CHERP	chr19:16629739-16629878
10662	2.55301	4.5777e-05	chr19	-	16652860	16652939	79	160	310	173	104	5	0	0	2	0	0	0	0	CHERP	chr19:16652860-16652939
26314	1.80833	0.000530369	chr19	+	16687968	16688047	79	34	80	80	0	0	0	0	0	0	0	0	0		chr19:16687968-16688047
26318	3.18919	4.95656e-05	chr19	+	16989342	16989421	79	225	162	313	48	8	0	0	0	1	0	0	0	SIN3B	chr19:16989342-16989421
26318	2.71951	3.77769e-05	chr19	+	16989702	16989741	39	153	133	40	0	4	40	0	0	0	0	0	0	SIN3B	chr19:16989702-16989741
10673	1.97814	0.000729472	chr19	-	17166783	17166822	39	73	73	96	6	40	17	0	0	0	0	0	0	HAUS8	chr19:17166783-17166822
26319	0.977679	0.00059872	chr19	+	17212768	17212847	79	1686	1481	1379	3093	647	940	0	4	4	2	0	0	MYO9B	chr19:17212768-17212847
26320	2.13	0.000299165	chr19	+	17295630	17295669	39	120	106	80	40	40	0	0	0	0	0	0	0	MYO9B	chr19:17295630-17295669
26321	1.16129	0.000417171	chr19	+	17303747	17303826	79	931	1136	461	1108	540	495	0	0	1	1	0	0	MYO9B	chr19:17303747-17303826
26322	1.67779	0.00020755	chr19	+	17305809	17305888	79	470	700	342	163	331	315	0	2	0	0	0	0	MYO9B	chr19:17305809-17305888
26322	1.19075	0.00051651	chr19	+	17305969	17306068	99	930	962	989	1290	467	628	11	13	11	14	5	7	MYO9B	chr19:17305969-17306068
26323	2.37097	0.000356505	chr19	+	17316541	17316620	79	159	552	225	123	80	53	0	0	0	0	0	0	MYO9B	chr19:17316541-17316620
26323	2.67763	0.000101156	chr19	+	17316721	17316800	79	115	206	237	25	39	0	0	2	2	0	0	0	MYO9B	chr19:17316721-17316800
26324	2.28191	0.000148581	chr19	+	17317151	17317190	39	109	160	40	40	0	28	0	0	0	0	0	0	MYO9B	chr19:17317151-17317190
26324	2.19167	0.000174806	chr19	+	17317211	17317270	59	287	183	135	120	0	60	0	1	0	0	0	0	MYO9B	chr19:17317211-17317270
26324	1.73387	0.000418816	chr19	+	17317491	17317530	39	114	176	235	172	80	0	0	0	0	0	0	0	MYO9B	chr19:17317491-17317530
26324	2.22656	0.000153058	chr19	+	17317831	17318010	179	1028	781	611	281	250	250	1	0	1	2	0	1	MYO9B	chr19:17317831-17318010
26325	2.36	0.000218103	chr19	+	17322756	17322835	79	153	99	90	5	5	0	0	1	1	0	0	0	MYO9B	chr19:17322756-17322835
26325	1.55909	0.000481342	chr19	+	17322916	17322955	39	246	240	80	200	80	40	0	0	0	0	0	0	MYO9B	chr19:17322916-17322955
26332	2.0019	0.000265762	chr19	+	17415509	17415588	79	235	346	230	27	260	0	0	1	0	0	0	0	MRPL34	chr19:17415509-17415588
26338	2.03382	0.000315981	chr19	+	17691205	17691344	139	584	356	440	392	65	6	0	0	1	1	0	0	GLT25D1	chr19:17691205-17691344
10685	2.43662	0.000229963	chr19	-	18374869	18374928	59	275	107	130	33	11	60	0	0	0	0	0	0	KIAA1683	chr19:18374869-18374928
10685	2.06266	0.000422381	chr19	-	18375189	18375268	79	255	216	79	125	18	0	0	0	0	0	0	0	KIAA1683	chr19:18375189-18375268
10685	2.72131	1.93167e-05	chr19	-	18376129	18376248	119	316	220	100	0	1	5	0	0	0	0	0	0	KIAA1683	chr19:18376129-18376248
10687	2.21099	0.00012034	chr19	-	18389064	18389183	119	1304	1187	1260	1013	281	226	19	13	17	12	3	2	JUND	chr19:18389064-18389183
10687	1.02036	0.000790275	chr19	-	18390064	18390083	19	247	248	239	326	244	152	1	1	0	0	0	1	JUND	chr19:18390064-18390083
10687	1.64521	7.76555e-05	chr19	-	18390224	18390323	99	1585	1112	1481	1081	674	675	3	2	0	0	0	1	JUND	chr19:18390224-18390323
10687	1.04947	0.000371273	chr19	-	18390904	18390983	79	1297	1794	879	1924	1228	599	3	0	0	5	3	0	JUND	chr19:18390904-18390983
10687	1.06171	0.000280177	chr19	-	18391304	18391403	99	1896	2821	2337	3142	2465	1017	5	4	2	3	5	3	JUND	chr19:18391304-18391403
10687	1.03108	0.00034987	chr19	-	18391544	18391683	139	3009	2360	1939	4931	967	1176	3	3	3	8	0	1	JUND	chr19:18391544-18391683
26425	1.92391	0.000303418	chr19	+	34856311	34856370	59	54	60	60	4	0	0	0	0	0	0	0	0	GPI	chr19:34856311-34856370
26426	2.73224	2.38503e-05	chr19	+	34857130	34857189	59	112	118	90	3	0	0	0	0	0	0	0	0	GPI	chr19:34857130-34857189
26426	1.26848	0.000719356	chr19	+	34857270	34857309	39	310	196	340	286	149	200	2	0	1	1	2	1	GPI	chr19:34857270-34857309
26426	1.725	0.000658968	chr19	+	34857390	34857469	79	90	0	80	0	0	0	0	0	1	0	0	0	GPI	chr19:34857390-34857469
26463	2.25207	0.00034324	chr19	+	38572854	38572933	79	39	111	147	2	0	0	0	2	0	0	0	0	SIPA1L3	chr19:38572854-38572933
26463	1.91566	0.000700187	chr19	+	38573354	38573413	59	86	196	174	60	64	28	0	0	0	0	0	0	SIPA1L3	chr19:38573354-38573413
26474	2.62435	0.000104352	chr19	+	39212346	39212465	119	714	520	428	242	0	170	0	0	1	0	0	0	ACTN4	chr19:39212346-39212465
26474	1.92222	0.000320379	chr19	+	39212566	39212685	119	120	64	148	0	0	0	0	0	0	0	0	0	ACTN4	chr19:39212566-39212685
26478	2.29032	0.000294529	chr19	+	39217935	39218074	139	216	353	356	0	169	0	0	1	0	0	0	0	ACTN4	chr19:39217935-39218074
26478	2.32917	0.000250436	chr19	+	39218135	39218214	79	178	141	0	0	0	0	0	0	0	0	0	0	ACTN4	chr19:39218135-39218214
26489	2.00501	7.84013e-05	chr19	+	39897557	39898076	519	8768	6821	5121	4576	2455	2540	13	9	8	5	4	0	ZFP36	chr19:39897557-39898076
26489	2.3	0.000305461	chr19	+	39898137	39898276	139	520	445	420	233	137	0	1	2	0	0	0	0	ZFP36	chr19:39898137-39898276
26489	2.75035	0.000180654	chr19	+	39898297	39898436	139	281	686	563	106	183	0	0	0	0	0	0	0	ZFP36	chr19:39898297-39898436
26489	3.86392	2.46724e-05	chr19	+	39898497	39898876	379	3088	3793	2551	543	620	460	7	10	9	0	0	0	ZFP36	chr19:39898497-39898876
26489	3.42907	4.20662e-05	chr19	+	39898897	39899176	279	3172	2274	2461	379	693	642	4	3	6	0	1	2	ZFP36	chr19:39898897-39899176
10808	0.948393	0.000967067	chr19	-	39926330	39926349	19	375	235	304	458	215	294	0	0	0	0	0	0	RPS16	chr19:39926330-39926349
26493	2.31111	0.000189658	chr19	+	39958662	39958721	59	258	376	122	159	43	23	0	0	0	0	0	0	SUPT5H	chr19:39958662-39958721
10838	2.12662	5.25612e-05	chr19	-	41859195	41859354	159	1433	1373	792	493	818	132	3	1	1	0	1	0	B9D2 TGFB1	chr19:41859195-41859354
10849	2.46894	1.61201e-05	chr19	-	42599575	42599674	99	96	265	134	0	0	22	0	0	0	0	0	0	POU2F2	chr19:42599575-42599674
10851	1.57391	0.000430624	chr19	-	42703578	42703597	19	153	80	69	71	39	60	0	0	0	0	0	0	DEDD2	chr19:42703578-42703597
26551	2.95238	2.80601e-06	chr19	+	44914157	44914196	39	187	219	218	3	69	60	0	0	0	0	0	0		chr19:44914157-44914196
26552	2.44492	0.000355166	chr19	+	44914613	44914692	79	194	288	410	109	90	24	0	0	0	0	0	0		chr19:44914613-44914692
10868	2.23868	0.000231779	chr19	-	44962249	44962348	99	613	934	321	227	270	171	0	1	1	1	0	0		chr19:44962249-44962348
10868	2.92308	8.2427e-05	chr19	-	44962369	44962408	39	392	428	120	21	40	179	0	0	1	0	0	1		chr19:44962369-44962408
26557	2.98333	0.000146837	chr19	+	45407151	45407230	79	325	71	80	0	0	0	0	0	0	0	0	0	TOMM40 APOE	chr19:45407151-45407230
26561	1.25874	0.000491929	chr19	+	45490599	45490618	19	103	219	158	159	150	60	0	0	0	0	0	0	CLPTM1	chr19:45490599-45490618
26561	1.20308	0.000966194	chr19	+	45490639	45490658	19	107	147	154	127	142	60	0	0	0	0	0	0	CLPTM1	chr19:45490639-45490658
26562	1.17001	0.000291297	chr19	+	45496031	45496090	59	959	823	678	881	654	531	4	3	4	6	4	2	CLPTM1	chr19:45496031-45496090
26564	1.0901	0.000597426	chr19	+	45561068	45561127	59	826	689	620	1007	501	443	1	1	0	0	0	0	CLASRP	chr19:45561068-45561127
26565	2.52418	5.33792e-05	chr19	+	45567269	45567388	119	970	1255	969	414	451	194	5	4	3	1	0	1	CLASRP	chr19:45567269-45567388
26565	3.25243	4.91303e-05	chr19	+	45567449	45567528	79	236	256	265	48	21	0	1	0	1	0	0	0	CLASRP	chr19:45567449-45567528
26565	4.05695	3.34324e-05	chr19	+	45567589	45567888	299	1394	1827	679	290	0	0	4	6	1	1	0	0	CLASRP	chr19:45567589-45567888
26566	1.77917	0.00066659	chr19	+	45594283	45594362	79	0	103	80	0	0	0	0	0	1	0	0	0	GEMIN7	chr19:45594283-45594362
26570	1.8766	0.000677358	chr19	+	45972961	45973000	39	83	158	80	41	4	70	0	0	0	0	0	0	FOSB	chr19:45972961-45973000
26570	1.52618	0.000436113	chr19	+	45973021	45973140	119	704	815	553	395	412	433	3	0	1	1	0	0	FOSB	chr19:45973021-45973140
26570	1.33952	0.000298984	chr19	+	45974061	45974220	159	1761	1962	1123	1936	745	807	2	1	1	5	0	0	FOSB	chr19:45974061-45974220
26570	1.99024	0.000583308	chr19	+	45975141	45975180	39	80	120	80	40	0	45	1	1	0	0	0	0	FOSB	chr19:45975141-45975180
26570	1.82709	0.000276841	chr19	+	45975821	45975960	139	822	679	615	432	404	132	0	0	0	0	0	0	FOSB	chr19:45975821-45975960
10880	3.29358	3.04626e-05	chr19	-	46280521	46280620	99	463	495	174	134	0	2	0	1	0	0	0	0	DMPK	chr19:46280521-46280620
10893	3.71888	0.000229769	chr19	-	47282104	47282183	79	215	850	420	104	109	13	1	1	0	0	0	0	SLC1A5	chr19:47282104-47282183
10896	1.3812	0.000233935	chr19	-	47291087	47291266	179	1616	2126	1197	1372	1045	1021	3	2	3	1	0	2	SLC1A5	chr19:47291087-47291266
10896	1.0531	0.000312135	chr19	-	47291547	47291666	119	3344	2816	2118	3354	2580	1883	3	0	4	7	5	1	SLC1A5	chr19:47291547-47291666
26585	2.51974	0.000115324	chr19	+	47729906	47730025	119	812	1087	418	536	150	14	1	0	0	1	0	0	MIR3190	chr19:47729906-47730025
26585	1.5323	0.000484706	chr19	+	47730266	47730325	59	358	327	222	282	97	153	0	1	0	0	0	0	MIR3190	chr19:47730266-47730325
26585	1.94578	0.000864274	chr19	+	47730506	47730525	19	31	132	100	23	83	0	0	0	0	0	0	0	MIR3190	chr19:47730506-47730525
26586	2.46535	0.000214688	chr19	+	47731605	47731664	59	120	26	148	22	0	0	3	2	1	0	0	0	MIR3190	chr19:47731605-47731664
10908	1.51376	0.000635703	chr19	-	49119245	49119264	19	113	115	38	138	20	0	1	0	0	0	0	0	RPL18	chr19:49119245-49119264
26611	1.19094	0.000556151	chr19	+	49377938	49377997	59	549	502	740	717	534	224	0	0	0	0	0	0	PPP1R15A	chr19:49377938-49377997
26611	1.26741	0.000663011	chr19	+	49378098	49378117	19	112	203	80	83	156	60	0	0	0	0	0	0	PPP1R15A	chr19:49378098-49378117
26620	2.06667	0.000428421	chr19	+	49513433	49513492	59	72	120	0	0	0	0	0	0	0	0	0	0	RUVBL2	chr19:49513433-49513492
26622	2.29583	0.000190184	chr19	+	49518190	49518269	79	0	151	160	0	0	0	0	0	0	0	0	0	RUVBL2	chr19:49518190-49518269
26626	1.94583	0.000101176	chr19	+	49610776	49610855	79	70	80	77	0	0	0	0	0	0	0	0	0	SNRNP70	chr19:49610776-49610855
26641	1.79444	0.000700486	chr19	+	50191243	50191302	59	21	83	39	0	0	0	0	0	0	0	0	0	PRMT1 C19orf76	chr19:50191243-50191302
26644	2.01667	0.000160801	chr19	+	50902516	50902615	99	128	99	78	0	0	0	0	0	0	0	0	0	POLD1	chr19:50902516-50902615
10932	2.34328	3.56893e-05	chr19	-	51301535	51301634	99	483	857	558	420	35	183	0	0	0	0	0	0	SNORD88B SNORD88A C19orf48	chr19:51301535-51301634
26675	2.32278	0.000175155	chr19	+	54969326	54969485	159	242	761	420	71	130	140	0	1	0	0	0	0	LENG8	chr19:54969326-54969485
26675	1.37179	0.000442088	chr19	+	54969586	54969625	39	304	342	185	370	80	128	0	1	2	1	0	0	LENG8	chr19:54969586-54969625
26675	2.90429	0.000107743	chr19	+	54970406	54970505	99	336	67	177	0	3	0	0	0	0	0	0	0	LENG8	chr19:54970406-54970505
26675	1.57563	0.000330632	chr19	+	54970886	54970965	79	291	779	501	414	393	110	2	1	0	0	0	0	LENG8	chr19:54970886-54970965
10963	1.15307	0.000521489	chr19	-	55752606	55752705	99	1412	1099	639	1803	381	496	0	0	0	1	0	2	PPP6R1	chr19:55752606-55752705
10963	2.98842	6.31158e-05	chr19	-	55753226	55753485	259	687	1385	713	200	0	229	2	5	5	0	0	0	PPP6R1	chr19:55753226-55753485
10966	2.0727	0.000127047	chr19	-	55769995	55770174	179	625	1147	740	782	115	36	7	5	9	9	1	0	PPP6R1	chr19:55769995-55770174
10971	1.9417	0.000606076	chr19	-	55918944	55918963	19	180	141	48	66	73	24	0	1	0	0	0	0	UBE2S	chr19:55918944-55918963
26710	1.89	0.000541932	chr19	+	58297897	58297996	99	40	119	100	0	0	0	0	1	1	0	0	0		chr19:58297897-58297996
10986	1.66667	0.000973283	chr19	-	59067958	59068037	79	0	80	80	0	0	0	0	0	0	0	0	0	UBE2M CHMP2A	chr19:59067958-59068037
31480	2.22222	0.000347671	chr2	-	9614188	9614207	19	39	157	140	40	20	60	1	0	0	0	0	0		chr2:9614188-9614207
31480	2.82485	0.000318461	chr2	-	9614328	9614467	139	925	801	225	156	159	110	1	3	0	0	0	0		chr2:9614328-9614467
31480	2.99713	9.72376e-05	chr2	-	9614728	9614927	199	687	330	453	0	96	0	3	1	0	0	0	0		chr2:9614728-9614927
31481	2.8345	6.74415e-05	chr2	-	9615114	9615213	99	805	608	300	317	0	96	0	1	1	0	0	0		chr2:9615114-9615213
31481	1.43698	0.000496873	chr2	-	9615294	9615373	79	449	579	461	407	160	399	0	1	0	0	0	0		chr2:9615294-9615373
31482	1.55677	0.000540254	chr2	-	9616110	9616169	59	235	404	182	60	119	280	0	0	0	1	0	0		chr2:9616110-9616169
24537	1.58026	0.000262153	chr2	+	20647042	20647101	59	436	275	562	420	183	139	1	0	0	0	0	0	RHOB	chr2:20647042-20647101
24537	1.18124	0.00036472	chr2	+	20647162	20647321	159	2841	2002	1984	3067	1409	1265	10	6	5	5	2	2	RHOB	chr2:20647162-20647321
24537	1.141	0.000848864	chr2	+	20647802	20647821	19	317	156	171	307	189	61	0	0	0	0	0	0	RHOB	chr2:20647802-20647821
24537	1.08719	0.000404259	chr2	+	20647842	20647921	79	1387	1171	1272	1953	1138	407	0	2	3	1	2	3	RHOB	chr2:20647842-20647921
24538	2.37917	0.000456174	chr2	+	24150075	24150154	79	133	0	194	0	0	0	0	0	1	0	0	0		chr2:24150075-24150154
31668	1.50839	0.000484357	chr2	-	38709556	38709635	79	560	358	342	278	240	243	3	3	1	0	1	2		chr2:38709556-38709635
31669	2.35772	0.000230341	chr2	-	38760542	38760621	79	204	266	156	129	0	0	1	0	0	0	0	0		chr2:38760542-38760621
31670	2.0101	0.000650638	chr2	-	38762320	38762359	39	40	161	73	30	37	11	0	0	1	0	0	0		chr2:38762320-38762359
31670	3.41686	0.000116597	chr2	-	38762400	38762539	139	242	466	327	7	0	0	1	0	0	0	0	0		chr2:38762400-38762539
31715	3.15989	0.000109587	chr2	-	43452027	43452246	219	458	776	438	0	0	74	0	0	0	0	0	1	ZFP36L2	chr2:43452027-43452246
31715	2.40652	0.000246691	chr2	-	43452587	43452706	119	310	370	355	217	6	0	0	0	2	0	0	0	ZFP36L2	chr2:43452587-43452706
31715	1.56167	0.000510322	chr2	-	43452847	43452886	39	176	193	220	96	111	127	0	0	0	0	0	0	ZFP36L2	chr2:43452847-43452886
31715	1.7371	0.000125361	chr2	-	43453447	43453526	79	412	761	326	303	385	80	2	1	0	0	0	0	ZFP36L2	chr2:43453447-43453526
31723	2.92675	1.12071e-05	chr2	-	44071785	44071884	99	210	140	265	0	14	0	0	0	1	0	0	0		chr2:44071785-44071884
31752	1.97047	8.14299e-05	chr2	-	44222607	44222926	319	3766	3528	2635	1776	1852	936	25	24	15	11	12	10	LRPPRC	chr2:44222607-44222926
24718	2.07511	0.000179047	chr2	+	44396584	44396683	99	317	312	460	149	100	118	3	1	1	1	0	2	PPM1B	chr2:44396584-44396683
31807	2.05085	0.000270908	chr2	-	54153103	54153142	39	160	120	80	40	0	76	1	0	0	0	0	0	PSME4	chr2:54153103-54153142
31937	2.12202	0.000273341	chr2	-	64751357	64751436	79	234	166	152	64	73	0	1	1	0	0	0	0		chr2:64751357-64751436
31945	1.91667	0.000735899	chr2	-	64855125	64855164	39	91	112	87	25	5	66	0	1	0	0	0	0		chr2:64855125-64855164
24925	1.30276	0.000328395	chr2	+	70057042	70057241	199	2375	2390	1745	2036	2135	698	2	1	2	0	1	0	GMCL1	chr2:70057042-70057241
24925	2.30667	0.000355287	chr2	+	70057342	70057381	39	321	320	80	200	51	0	3	2	1	1	0	0	GMCL1	chr2:70057342-70057381
24940	1.72993	0.000254002	chr2	+	70314733	70314832	99	566	382	307	249	217	140	1	3	6	0	1	3	PCBP1	chr2:70314733-70314832
31990	1.96667	0.000420197	chr2	-	71216195	71216254	59	0	114	60	0	0	0	0	0	0	0	0	0	TEX261	chr2:71216195-71216254
32024	1.95041	0.000295556	chr2	-	74692531	74692610	79	80	105	47	0	0	2	0	0	0	0	0	0	MOGS	chr2:74692531-74692610
24991	1.94667	0.000135442	chr2	+	75061806	75061905	99	93	92	95	0	0	0	1	0	0	0	0	0	HK2	chr2:75061806-75061905
25016	1.04932	0.000203874	chr2	+	85766440	85766539	99	3974	3977	2918	3699	3706	2976	7	7	2	3	1	2	MAT2A	chr2:85766440-85766539
25016	2.5046	0.000152506	chr2	+	85766600	85766699	99	462	363	227	100	100	43	2	0	0	0	0	0	MAT2A	chr2:85766600-85766699
25016	1.55243	0.000231392	chr2	+	85766740	85766879	139	2157	2003	1743	1439	1834	390	4	2	1	0	1	1	MAT2A	chr2:85766740-85766879
25016	1.43055	0.000155762	chr2	+	85777840	85777899	59	491	773	614	390	323	554	0	2	1	0	0	0		chr2:85777840-85777899
25021	2.29231	0.000240658	chr2	+	85822473	85822612	139	529	523	163	118	0	169	0	0	1	1	0	1	RNF181	chr2:85822473-85822612
32190	0.983787	0.00064025	chr2	-	96970505	96970544	39	574	813	362	884	464	432	1	2	0	0	1	2	SNRNP200	chr2:96970505-96970544
25083	2.5098	0.000204071	chr2	+	97426790	97426889	99	74	185	205	6	0	0	0	0	1	0	0	0	CNNM4	chr2:97426790-97426889
25156	3.95982	0.000122927	chr2	+	111878929	111879008	79	770	261	495	123	85	0	2	0	0	0	0	0	BCL2L11	chr2:111878929-111879008
25156	2.10913	9.75603e-05	chr2	+	111879609	111879768	159	1994	1667	1349	715	438	986	10	1	8	0	1	4	BCL2L11	chr2:111879609-111879768
25157	1.56776	0.000560883	chr2	+	111880406	111880485	79	472	332	282	458	68	86	3	1	0	1	0	0	BCL2L11	chr2:111880406-111880485
25157	2.66408	0.000387787	chr2	+	111880586	111880685	99	172	466	93	43	0	44	0	0	0	0	0	0	BCL2L11	chr2:111880586-111880685
25171	1.78518	8.52413e-05	chr2	+	113403607	113403686	79	1033	1073	468	512	400	436	1	4	2	1	0	0	SLC20A1	chr2:113403607-113403686
32508	9.34272	0.000170639	chr2	-	133014466	133014725	259	12237	10081	7504	1111	862	588	186	173	121	13	14	8	ANKRD30BL MIR663B	chr2:133014466-133014725
32509	1.65814	4.57252e-05	chr2	-	133015158	133015357	199	10921	11754	8699	7888	5271	5604	184	180	150	117	91	82	ANKRD30BL MIR663B	chr2:133015158-133015357
32510	1.65757	5.37544e-05	chr2	-	133015495	133015554	59	1185	875	737	837	476	291	0	0	0	3	0	0	ANKRD30BL MIR663B	chr2:133015495-133015554
32511	2.01477	0.000298671	chr2	-	133016815	133016954	139	545	699	382	418	11	198	10	15	9	5	0	4	ANKRD30BL	chr2:133016815-133016954
32511	1.23846	0.000656581	chr2	-	133017175	133017214	39	479	367	178	468	156	192	18	12	6	20	0	6	ANKRD30BL	chr2:133017175-133017214
32515	1.73253	7.4019e-05	chr2	-	133022651	133022770	119	2140	2038	1775	669	1350	1256	50	39	25	12	29	27		chr2:133022651-133022770
32516	2.4577	4.18633e-05	chr2	-	133023095	133023454	359	9281	8222	8046	3934	4268	1569	70	52	55	26	29	13		chr2:133023095-133023454
25236	2.91128	0.000114603	chr2	+	133023120	133023299	179	3759	4027	2705	1586	572	1078	56	64	51	29	11	22		chr2:133023120-133023299
32517	3.77353	4.86292e-07	chr2	-	133023474	133023613	139	2724	2648	2153	448	588	657	38	38	33	7	12	8		chr2:133023474-133023613
32520	1.43941	0.000186743	chr2	-	133032859	133032938	79	753	770	702	595	495	370	14	16	13	14	10	9		chr2:133032859-133032938
32520	7.50444	2.48356e-05	chr2	-	133033059	133033198	139	1220	1536	1041	26	92	25	0	0	2	0	0	0		chr2:133033059-133033198
32520	3.67552	4.75981e-07	chr2	-	133033359	133033478	119	539	486	404	159	0	0	17	9	11	2	0	0		chr2:133033359-133033478
32520	3.60321	2.11011e-07	chr2	-	133033519	133033578	59	502	356	533	143	60	53	0	0	0	0	0	0		chr2:133033519-133033578
32526	1.68374	6.85675e-05	chr2	-	133040204	133040303	99	1177	1226	671	462	832	436	5	5	1	0	0	0		chr2:133040204-133040303
32529	4.04805	1.18759e-05	chr2	-	133043810	133043889	79	341	635	545	55	142	0	0	2	0	0	0	0		chr2:133043810-133043889
32530	3.20357	8.11941e-05	chr2	-	133045451	133045510	59	249	288	164	0	0	100	1	2	1	0	0	0		chr2:133045451-133045510
25257	1.73333	0.000789639	chr2	+	136499907	136499986	79	96	0	80	0	0	0	0	0	0	0	0	0	UBXN4	chr2:136499907-136499986
25522	1.32381	0.000826235	chr2	+	162137134	162137153	19	80	113	160	80	52	123	0	1	0	0	0	0		chr2:162137134-162137153
25523	0.970657	0.000348213	chr2	+	162138218	162138337	119	4677	6875	5102	1338	8907	6990	11	8	3	0	3	3		chr2:162138218-162138337
25523	1.595	0.000219222	chr2	+	162138578	162138977	399	5925	7390	6458	4170	3620	4142	10	14	17	7	8	15		chr2:162138578-162138977
25523	1.20829	0.000568888	chr2	+	162139138	162139177	39	277	532	208	463	118	240	0	0	0	0	0	0		chr2:162139138-162139177
25543	1.75787	8.42205e-05	chr2	+	170684447	170684566	119	1752	1730	995	1402	396	601	2	2	1	1	0	0	UBR3	chr2:170684447-170684566
25599	4.40952	1.02409e-05	chr2	+	178128894	178129033	139	430	516	466	0	0	0	2	3	0	0	0	0		chr2:178128894-178129033
25599	1.58889	0.00089289	chr2	+	178129854	178129893	39	80	250	118	80	120	40	0	0	1	0	0	0		chr2:178129854-178129893
25604	2.51111	0.000140405	chr2	+	178977617	178977676	59	0	164	108	0	0	0	0	0	0	0	0	0	RBM45	chr2:178977617-178977676
25666	1.18887	0.000459859	chr2	+	191745743	191745782	39	454	325	503	635	144	283	0	1	1	1	0	0	GLS	chr2:191745743-191745782
25748	2	5.22587e-05	chr2	+	198318069	198318128	59	60	60	60	0	0	0	0	0	0	0	0	0	COQ10B	chr2:198318069-198318128
32919	1.18799	0.000984092	chr2	-	198364056	198364075	19	120	180	95	180	63	80	0	0	0	0	0	0	HSPD1	chr2:198364056-198364075
32919	1.29377	0.00083622	chr2	-	198364276	198364295	19	168	82	126	120	57	100	0	0	0	0	0	0	HSPD1	chr2:198364276-198364295
32919	1.61739	0.00036051	chr2	-	198364316	198364335	19	139	66	107	41	60	69	0	0	0	0	0	0	HSPD1	chr2:198364316-198364335
25753	1.09857	0.000835248	chr2	+	198570372	198570391	19	259	167	123	312	46	140	1	0	0	0	0	0	MARS2	chr2:198570372-198570391
25753	1.46916	0.000118991	chr2	+	198570732	198570771	39	506	441	267	323	286	179	0	0	0	0	0	0	MARS2	chr2:198570732-198570771
32960	2.25824	0.00028353	chr2	-	208631816	208631875	59	117	114	0	2	0	0	0	0	0	0	0	0	FZD5	chr2:208631816-208631875
25888	2.19512	0.00035398	chr2	+	220025376	220025435	59	144	146	160	0	52	55	0	0	0	0	0	0		chr2:220025376-220025435
25941	2.30565	0.000174973	chr2	+	232573968	232574067	99	250	372	458	263	0	39	0	0	2	0	0	0	PTMA	chr2:232573968-232574067
25941	2.33702	9.16354e-06	chr2	+	232574208	232574267	59	60	123	60	1	0	0	0	0	0	0	0	0	PTMA	chr2:232574208-232574267
25942	2.46767	0.00014772	chr2	+	232575091	232575330	239	371	618	416	146	0	0	0	0	3	0	0	0	PTMA	chr2:232575091-232575330
25942	1.45455	0.000957855	chr2	+	232575891	232575930	39	80	240	200	40	120	160	0	0	0	0	0	0	PTMA	chr2:232575891-232575930
25942	1.32942	0.000670549	chr2	+	232576011	232576070	59	458	313	393	300	412	131	3	0	1	0	0	0	PTMA MIR1244-1 MIR1244-3 MIR1244-2	chr2:232576011-232576070
33	2.26235	0.000342741	chr20	+	826033	826192	159	320	223	297	107	0	0	0	1	1	0	0	0	FAM110A	chr20:826033-826192
41	1.15426	0.000800782	chr20	+	2633493	2633532	39	260	400	293	418	311	91	1	0	2	0	0	0	NOP56 MIR1292 SNORD110	chr20:2633493-2633532
48	1.61307	0.000562839	chr20	+	3777314	3777353	39	108	264	150	80	118	80	0	0	0	0	0	0	CDC25B	chr20:3777314-3777353
48	2.53514	4.09931e-05	chr20	+	3777414	3777453	39	72	157	112	21	0	40	2	0	0	0	0	1	CDC25B	chr20:3777414-3777453
48	4.65	5.40242e-06	chr20	+	3778274	3778373	99	387	163	537	0	0	0	0	1	1	0	0	0	CDC25B	chr20:3778274-3778373
16775	1.89344	0.000526652	chr20	-	5099927	5099986	59	202	251	60	0	126	60	0	0	0	0	0	0	PCNA	chr20:5099927-5099986
16797	1.00867	0.000988895	chr20	-	17640545	17640564	19	177	285	176	143	232	257	0	0	0	0	0	0	RRBP1	chr20:17640545-17640564
16823	4.07815	2.48191e-06	chr20	-	26188746	26188945	199	27044	17930	15938	9057	3397	1978	234	175	130	84	41	20	MIR663A LOC284801	chr20:26188746-26188945
134	2.68112	2.75231e-05	chr20	+	26188817	26188936	119	182	222	267	0	0	32	1	2	2	0	0	0		chr20:26188817-26188936
16824	1.7648	2.10588e-06	chr20	-	26188995	26189194	199	125890	138123	111373	93606	64430	54601	316	314	276	177	158	131	MIR663A LOC284801	chr20:26188995-26189194
134	3.53743	4.45863e-06	chr20	+	26188997	26189136	139	7419	7006	4616	2607	1017	1436	28	23	22	11	4	11		chr20:26188997-26189136
16825	4.0385	0.000236414	chr20	-	26189265	26189524	259	10459	10955	8741	3621	1675	1609	96	130	90	38	17	17	MIR663A LOC284801	chr20:26189265-26189524
16826	1.14768	5.57437e-05	chr20	-	26189763	26190282	519	238153	236139	196030	285518	158738	141373	1716	1610	1289	1991	890	699	MIR663A LOC284801	chr20:26189763-26190282
135	2.52752	0.000130853	chr20	+	26189771	26189950	179	842	867	398	327	70	129	10	12	5	4	1	1		chr20:26189771-26189950
135	3.24806	0.00010753	chr20	+	26189971	26190210	239	1713	2344	904	531	104	387	17	20	6	7	2	6		chr20:26189971-26190210
144	1.88378	7.20967e-05	chr20	+	30193396	30193495	99	696	624	702	307	205	423	2	0	1	1	0	0	ID1 MIR3193	chr20:30193396-30193495
197	1.94792	0.000736336	chr20	+	34091888	34091947	59	121	14	59	5	0	7	0	0	0	0	0	0	CEP250	chr20:34091888-34091947
226	2.08889	0.000710967	chr20	+	37075710	37075769	59	0	119	77	0	0	0	0	0	0	0	0	0	SNORA39 SNHG11	chr20:37075710-37075769
229	1.807	9.07117e-05	chr20	+	37555523	37555622	99	852	875	390	580	116	346	0	1	1	0	0	0	FAM83D	chr20:37555523-37555622
231	2.56283	0.000149515	chr20	+	39657492	39657631	139	1520	2295	1031	900	420	317	0	4	0	0	0	1	TOP1	chr20:39657492-39657631
302	1.20447	0.000669628	chr20	+	48600520	48600599	79	604	812	439	810	435	253	0	2	0	1	1	0	SNAI1	chr20:48600520-48600599
304	1.41137	0.000784602	chr20	+	48604772	48604851	79	421	380	416	576	202	20	0	0	2	0	0	0	SNAI1	chr20:48604772-48604851
304	1.83978	0.000287533	chr20	+	48604952	48604971	19	140	80	53	80	1	40	0	0	0	0	0	0	SNAI1	chr20:48604952-48604971
16917	2.67961	0.000107164	chr20	-	49490367	49490426	59	150	60	162	17	0	9	0	0	0	0	0	0		chr20:49490367-49490426
16917	2.47191	0.000143364	chr20	-	49490667	49490706	39	118	158	40	21	35	2	1	0	0	0	0	0		chr20:49490667-49490706
16933	1.96944	0.000393568	chr20	-	49574745	49574804	59	225	180	120	120	60	0	0	1	0	0	0	0	DPM1	chr20:49574745-49574804
332	2.44853	0.000295058	chr20	+	57465488	57465567	79	124	249	53	32	0	0	0	0	0	0	0	0	GNAS	chr20:57465488-57465567
332	1.99262	0.000485674	chr20	+	57465868	57465947	79	114	139	47	31	0	0	0	0	0	0	0	0	GNAS	chr20:57465868-57465947
16975	2.04992	0.00021281	chr20	-	61510932	61511011	79	311	407	385	194	130	97	2	1	0	0	0	0	DIDO1	chr20:61510932-61511011
16977	2.91576	0.000121143	chr20	-	61529245	61529324	79	151	267	407	38	72	18	0	0	2	0	0	0	DIDO1	chr20:61529245-61529324
352	1.99568	0.000468894	chr20	+	61908093	61908172	79	144	292	240	119	80	24	0	0	2	0	0	0	ARFGAP1	chr20:61908093-61908172
353	1.29464	0.000352711	chr20	+	61919018	61919037	19	212	200	100	67	157	160	0	1	1	0	1	0	ARFGAP1 MIR4326	chr20:61919018-61919037
353	1.50061	0.000409867	chr20	+	61919878	61920037	159	651	1526	1024	767	404	806	1	1	1	1	0	0	ARFGAP1 MIR4326	chr20:61919878-61920037
353	2.36811	0.000131014	chr20	+	61920198	61920277	79	434	330	199	175	0	89	0	0	0	1	0	0	ARFGAP1	chr20:61920198-61920277
353	1.88987	0.000371693	chr20	+	61920298	61920377	79	376	343	324	437	0	0	0	1	0	1	0	0	ARFGAP1	chr20:61920298-61920377
353	1.86938	0.00071335	chr20	+	61920898	61920957	59	187	357	145	213	54	20	0	1	0	0	0	0	ARFGAP1	chr20:61920898-61920957
354	1.83966	0.000771023	chr20	+	62340056	62340095	39	120	156	40	86	31	0	0	0	0	0	0	0	ZGPAT	chr20:62340056-62340095
355	2.81026	0.000197979	chr20	+	62365049	62365088	39	188	59	181	0	35	40	0	0	0	0	0	0	ZGPAT	chr20:62365049-62365088
355	2.13	0.000342996	chr20	+	62365109	62365168	59	170	126	163	0	60	60	0	0	0	0	0	0	ZGPAT	chr20:62365109-62365168
355	2.2435	0.000234081	chr20	+	62366429	62366568	139	503	391	318	307	0	0	1	1	0	1	0	0	ZGPAT LIME1	chr20:62366429-62366568
355	2.53994	2.35822e-05	chr20	+	62366749	62366848	99	316	644	326	100	226	0	0	1	0	0	0	0	ZGPAT LIME1	chr20:62366749-62366848
355	2.69176	1.40932e-05	chr20	+	62366889	62367028	139	147	351	222	0	5	0	0	0	1	0	0	0	ZGPAT LIME1	chr20:62366889-62367028
355	2.11111	0.000289814	chr20	+	62367049	62367108	59	53	87	60	0	0	0	0	0	0	0	0	0	ZGPAT LIME1	chr20:62367049-62367108
355	3.21932	0.000131978	chr20	+	62367449	62367548	99	200	327	398	71	0	12	1	0	1	0	0	0	ZGPAT LIME1	chr20:62367449-62367548
356	2.32063	0.000250344	chr20	+	62369730	62369969	239	493	305	244	41	0	0	1	0	0	0	0	0	SLC2A4RG LIME1	chr20:62369730-62369969
356	2.7619	8.3189e-05	chr20	+	62370050	62370269	219	617	960	705	381	0	26	2	1	1	1	0	0	SLC2A4RG LIME1	chr20:62370050-62370269
372	1.66667	0.000973283	chr20	+	62663883	62663962	79	0	80	80	0	0	0	0	0	0	0	0	0	LINC00176 PRPF6	chr20:62663883-62663962
373	2.07222	0.00076698	chr20	+	62887330	62887389	59	60	125	0	0	0	0	0	2	0	0	0	0	PCMTD2	chr20:62887330-62887389
14828	0.994714	0.000723796	chr21	-	9696015	9696094	79	1367	1068	1253	1450	1229	1042	2	2	2	1	2	0		chr21:9696015-9696094
40062	2.70333	0.000301058	chr21	+	9700129	9700228	99	315	0	180	0	0	0	1	0	3	0	0	0		chr21:9700129-9700228
40062	2.5375	9.76405e-05	chr21	+	9700289	9700368	79	138	33	190	0	0	0	0	1	1	0	0	0		chr21:9700289-9700368
40063	2.70557	3.65763e-07	chr21	+	9825431	9826590	1159	494830	515626	427132	317445	116346	96767	3074	3187	2659	1756	640	549	MIR3648 MIR3687	chr21:9825431-9826590
14830	1.83969	0.000730767	chr21	-	9825478	9825537	59	170	154	175	166	23	0	4	5	2	5	1	0		chr21:9825478-9825537
14830	2.45607	9.71151e-05	chr21	-	9825758	9825797	39	187	208	72	105	10	0	0	0	0	1	0	0		chr21:9825758-9825797
14830	1.89382	0.000554942	chr21	-	9826058	9826137	79	159	333	249	198	80	0	0	0	0	0	0	0		chr21:9826058-9826137
40068	0.86779	0.000982005	chr21	+	9854780	9854799	19	481	453	337	671	293	515	0	0	2	0	0	1		chr21:9854780-9854799
40073	1.15643	0.000314853	chr21	+	9874885	9874964	79	1253	1329	814	1472	692	754	2	1	1	0	0	0		chr21:9874885-9874964
40083	1.28793	0.000904263	chr21	+	9906283	9906302	19	94	126	136	169	45	49	0	0	0	0	0	0		chr21:9906283-9906302
40083	1.39162	0.000458666	chr21	+	9906503	9906562	59	286	536	343	542	244	8	0	2	2	0	1	0		chr21:9906503-9906562
40083	1.41259	0.000635513	chr21	+	9909183	9909222	39	195	215	274	257	104	91	0	0	1	0	0	0		chr21:9909183-9909222
40083	1.24041	0.000699649	chr21	+	9909243	9909262	19	130	169	126	204	100	27	0	0	0	0	0	0		chr21:9909243-9909262
40083	2.83621	1.9732e-05	chr21	+	9909543	9909622	79	192	365	178	67	0	41	0	2	1	0	0	0		chr21:9909543-9909622
40083	3.62206	6.00688e-07	chr21	+	9909803	9909922	119	1279	1797	978	522	107	236	4	5	4	0	0	2		chr21:9909803-9909922
40084	2.02254	0.000318966	chr21	+	9910649	9910708	59	110	180	240	60	55	60	1	0	1	0	0	0		chr21:9910649-9910708
40084	1.70504	0.000255591	chr21	+	9910849	9910988	139	1590	1068	972	928	557	475	2	0	0	0	0	0		chr21:9910849-9910988
40085	1.10471	0.000875596	chr21	+	9911462	9911501	39	316	429	277	433	142	342	0	0	2	0	1	0		chr21:9911462-9911501
40085	1.43034	0.000218789	chr21	+	9911662	9911741	79	558	1048	805	906	197	516	0	1	1	0	0	0		chr21:9911662-9911741
40085	1.42674	0.000605854	chr21	+	9911822	9911901	79	397	513	400	688	160	0	1	1	0	1	0	0		chr21:9911822-9911901
40086	1.75795	0.000144389	chr21	+	9912554	9912613	59	212	532	343	211	162	170	1	0	0	0	0	0		chr21:9912554-9912613
40086	1.11822	0.000641144	chr21	+	9913894	9913953	59	467	688	742	1078	413	190	0	1	0	0	0	0		chr21:9913894-9913953
40086	1.05944	0.000732084	chr21	+	9914234	9914253	19	286	241	126	230	113	270	0	0	0	0	0	0		chr21:9914234-9914253
40091	1.41599	0.000256672	chr21	+	9922595	9922714	119	1695	1035	954	1294	631	583	18	7	9	11	5	5		chr21:9922595-9922714
40094	1.25263	0.000718106	chr21	+	9925477	9925496	19	178	138	100	140	80	100	0	0	0	0	0	0		chr21:9925477-9925496
40094	1.71173	8.1312e-05	chr21	+	9925537	9925616	79	499	876	484	627	121	255	7	12	7	7	0	4		chr21:9925537-9925616
40094	5.01338	7.31869e-06	chr21	+	9925737	9925896	159	1445	1812	1495	117	290	159	2	1	0	0	0	0		chr21:9925737-9925896
40094	2.63503	0.00019409	chr21	+	9926077	9926176	99	449	848	270	420	4	0	8	14	4	6	0	0		chr21:9926077-9926176
40094	3.118	2.48416e-05	chr21	+	9926197	9926276	79	513	559	231	234	22	0	2	2	0	1	0	0		chr21:9926197-9926276
40094	3.42526	5.31415e-05	chr21	+	9926397	9926556	159	669	1059	664	257	0	114	6	7	8	2	0	1		chr21:9926397-9926556
40094	2.71883	0.000124348	chr21	+	9926577	9926796	219	363	598	413	60	34	0	2	1	1	0	0	0		chr21:9926577-9926796
40095	1.84051	0.000140015	chr21	+	9927059	9927178	119	802	1644	771	702	352	536	1	1	1	0	0	0		chr21:9927059-9927178
40095	1.17308	0.00067742	chr21	+	9927279	9927318	39	452	240	400	446	112	362	1	0	1	0	0	0		chr21:9927279-9927318
14885	2.08072	0.000505172	chr21	-	19191060	19191139	79	239	127	318	126	0	80	1	0	0	0	0	0	C21orf91	chr21:19191060-19191139
14915	1.89335	0.000484919	chr21	-	33044347	33044466	119	415	413	309	71	246	120	1	1	1	0	0	0	SCAF4	chr21:33044347-33044466
14922	2.08174	0.000215726	chr21	-	33721682	33721741	59	259	180	145	37	64	86	0	0	0	0	0	0	URB1	chr21:33721682-33721741
14985	2.12048	0.000646915	chr21	-	45194327	45194386	59	60	109	179	69	0	0	0	0	0	0	0	0	CSTB	chr21:45194327-45194386
40194	2.07166	0.000232088	chr21	+	45222788	45222827	39	255	181	80	92	95	0	0	0	0	0	0	0	RRP1	chr21:45222788-45222827
40194	3.84119	0.000103186	chr21	+	45223068	45223167	99	643	408	197	38	65	0	0	0	0	0	0	0	RRP1	chr21:45223068-45223167
40194	1.65417	0.000257153	chr21	+	45223568	45223607	39	118	352	204	98	130	132	0	0	0	0	0	0	RRP1	chr21:45223568-45223607
40194	2.2268	0.000854202	chr21	+	45223628	45223647	19	57	218	97	40	40	54	0	0	0	0	0	0	RRP1	chr21:45223628-45223647
40196	2.89824	0.00011425	chr21	+	45228206	45228445	239	661	749	169	23	0	53	2	0	0	0	0	0		chr21:45228206-45228445
40196	1.96939	0.000700592	chr21	+	45228466	45228505	39	118	80	68	0	0	76	0	0	0	0	0	0		chr21:45228466-45228505
40196	3.13946	0.000241868	chr21	+	45228626	45228765	139	173	688	553	78	0	86	0	2	1	0	0	1		chr21:45228626-45228765
40196	1.92777	0.000250432	chr21	+	45228946	45229025	79	331	234	388	77	153	153	1	0	1	0	0	0		chr21:45228946-45229025
40196	2.37143	0.000546647	chr21	+	45229126	45229185	59	152	103	229	100	0	0	0	0	0	0	0	0		chr21:45229126-45229185
40196	4.10569	0.000185083	chr21	+	45229206	45229485	279	710	1420	1054	144	0	0	1	1	2	0	0	0		chr21:45229206-45229485
40196	3.23876	5.30334e-05	chr21	+	45229506	45229585	79	457	285	159	116	0	0	2	0	1	0	0	0		chr21:45229506-45229585
40197	3.43852	8.70413e-05	chr21	+	45229766	45230085	319	1610	1752	951	47	98	432	2	1	0	0	0	0		chr21:45229766-45230085
40198	1.92904	0.000286621	chr21	+	45231049	45231128	79	237	367	325	80	183	103	0	0	0	0	0	0		chr21:45231049-45231128
40198	2.31731	0.000319544	chr21	+	45231329	45231408	79	230	169	84	72	0	0	0	0	0	0	0	0		chr21:45231329-45231408
40198	1.72892	0.00055608	chr21	+	45231609	45231648	39	158	182	110	91	65	56	0	1	0	0	0	0		chr21:45231609-45231648
40198	2.59	0.000362527	chr21	+	45231889	45231988	99	34	152	283	0	0	0	0	1	1	0	0	0		chr21:45231889-45231988
3406	2.55224	9.85705e-05	chr22	-	19418634	19418713	79	192	150	273	95	0	0	0	0	0	0	0	0	HIRA	chr22:19418634-19418713
3406	2.274	0.000288578	chr22	-	19418814	19418913	99	350	195	292	200	0	0	0	0	0	0	0	0	HIRA	chr22:19418814-19418913
1625	1.82778	0.000567976	chr22	+	22051595	22051654	59	60	13	76	0	0	0	0	0	0	0	0	0	PPIL2	chr22:22051595-22051654
3465	2.61111	0.000124364	chr22	-	32017127	32017186	59	114	176	0	0	0	0	0	0	0	0	0	0	PISD	chr22:32017127-32017186
3465	1.91111	0.000566177	chr22	-	32017247	32017306	59	210	180	110	0	60	120	1	1	0	0	0	0	PISD	chr22:32017247-32017306
3465	2.02365	0.000497894	chr22	-	32017387	32017446	59	206	118	83	48	24	40	2	0	1	1	0	0	PISD	chr22:32017387-32017446
3477	1.93092	0.000731284	chr22	-	34315702	34315761	59	125	145	137	0	20	104	0	0	0	0	0	0	LARGE	chr22:34315702-34315761
1726	1.36417	0.00067882	chr22	+	38013088	38013167	79	401	501	472	458	382	97	0	1	1	3	0	0	GGA1	chr22:38013088-38013167
1727	1.44398	0.000704051	chr22	+	38028465	38028484	19	124	120	40	101	60	20	0	1	0	0	0	0	GGA1	chr22:38028465-38028484
3537	1.5675	0.000646251	chr22	-	39702705	39702744	39	140	223	144	136	144	0	0	0	0	0	0	0		chr22:39702705-39702744
3540	1.72683	0.000368338	chr22	-	39708996	39709035	39	203	129	252	123	117	50	0	0	1	0	0	0	SNORD83B RPL3	chr22:39708996-39709035
1757	1.13909	0.000478995	chr22	+	39916770	39916869	99	1803	1511	817	1356	1122	1121	4	2	0	0	1	2	ATF4	chr22:39916770-39916869
1757	1.20503	0.000443433	chr22	+	39917150	39917229	79	993	858	1016	632	881	828	0	1	1	0	0	1	ATF4	chr22:39917150-39917229
1758	1.75414	0.00018984	chr22	+	39924973	39925012	39	269	224	125	154	92	57	0	1	0	0	0	0		chr22:39924973-39925012
1808	2.03801	0.000213273	chr22	+	43058332	43058491	159	662	504	957	645	164	0	3	2	1	0	0	0		chr22:43058332-43058491
1808	2.90347	2.14727e-06	chr22	+	43058552	43058631	79	200	151	161	19	0	0	0	0	0	0	0	0		chr22:43058552-43058631
1823	3.07927	0.000183371	chr22	+	50356426	50356645	219	1122	793	625	363	16	0	1	4	1	2	0	0	PIM3	chr22:50356426-50356645
1823	2.37571	0.000150188	chr22	+	50356686	50357045	359	1225	1144	1108	677	84	90	1	7	2	1	0	0	PIM3	chr22:50356686-50357045
1823	1.74822	0.000443174	chr22	+	50357066	50357145	79	361	454	170	285	70	104	0	1	0	1	0	0	PIM3	chr22:50357066-50357145
3591	1.97333	0.000649101	chr22	-	50647795	50647854	59	116	180	116	120	0	0	0	0	0	0	0	0		chr22:50647795-50647854
3592	2.59888	0.000190265	chr22	-	50649089	50649208	119	486	275	256	55	99	22	1	2	1	0	0	0		chr22:50649089-50649208
3592	2.75278	8.99219e-06	chr22	-	50649349	50649468	119	172	328	131	0	0	0	0	0	0	0	0	0		chr22:50649349-50649468
3594	3.06621	0.000189778	chr22	-	50653764	50653883	119	315	496	168	78	0	0	0	0	1	0	0	0		chr22:50653764-50653883
3594	2.03333	4.33364e-05	chr22	-	50653944	50654003	59	60	60	58	0	0	0	0	1	1	0	0	0		chr22:50653944-50654003
3596	2.10432	0.00039518	chr22	-	50657352	50657571	219	1030	965	403	242	96	459	2	0	0	0	0	0	TUBGCP6	chr22:50657352-50657571
3597	1.6303	0.000822617	chr22	-	50659145	50659184	39	160	178	80	125	80	5	0	0	0	0	0	0	TUBGCP6	chr22:50659145-50659184
3597	2.20225	0.000319461	chr22	-	50659325	50659464	139	517	349	478	194	3	184	0	0	0	0	0	0	TUBGCP6	chr22:50659325-50659464
3597	2.31325	0.000102851	chr22	-	50659685	50659744	59	308	356	116	149	26	60	0	0	0	0	0	0	TUBGCP6	chr22:50659685-50659744
3597	2.1283	0.000132598	chr22	-	50659785	50659824	39	142	194	108	107	38	0	0	0	0	0	0	0	TUBGCP6	chr22:50659785-50659824
3599	1.26081	0.000663385	chr22	-	50682788	50682827	39	388	247	228	145	317	200	2	0	0	0	1	0	HDAC10 TUBGCP6	chr22:50682788-50682827
3600	2.47235	0.000144912	chr22	-	50714098	50714197	99	502	420	335	303	0	30	1	1	0	0	0	0	PLXNB2	chr22:50714098-50714197
3605	2.08081	9.1348e-05	chr22	-	50893021	50893140	119	1082	1202	628	427	235	562	3	3	0	0	0	0	SBF1	chr22:50893021-50893140
3605	2.36975	0.000249482	chr22	-	50893521	50893600	79	263	483	134	93	89	54	0	2	0	0	0	0	SBF1	chr22:50893521-50893600
3605	2.35508	0.000185152	chr22	-	50893701	50893800	99	567	694	312	186	311	0	1	0	0	0	0	0	SBF1	chr22:50893701-50893800
3606	3.22222	0.000189503	chr22	-	50894288	50894367	79	324	73	200	15	0	2	1	0	0	1	0	0	SBF1	chr22:50894288-50894367
3606	1.76071	0.000724585	chr22	-	50894488	50894527	39	80	156	137	80	40	40	0	0	0	0	0	0	SBF1	chr22:50894488-50894527
3606	3.02907	9.53553e-05	chr22	-	50894568	50894647	79	80	411	307	75	0	25	0	1	0	1	0	0	SBF1	chr22:50894568-50894647
3607	2.75	3.01089e-05	chr22	-	50895437	50895496	59	102	52	157	0	0	0	1	0	0	0	0	0	SBF1	chr22:50895437-50895496
3607	4.20521	7.90722e-05	chr22	-	50895797	50895916	119	277	1057	884	119	135	0	0	1	0	0	0	0	SBF1	chr22:50895797-50895916
3607	3.34711	6.57383e-05	chr22	-	50896257	50896336	79	122	140	304	0	2	0	0	0	1	0	0	0	SBF1	chr22:50896257-50896336
3608	2.37795	0.000246101	chr22	-	50898275	50898354	79	440	218	302	28	0	236	0	1	1	1	0	0	SBF1	chr22:50898275-50898354
3608	1.9696	0.000130295	chr22	-	50898415	50898514	99	1167	1681	667	641	443	553	0	2	0	0	0	1	SBF1	chr22:50898415-50898514
3608	1.90487	0.000105188	chr22	-	50898715	50898834	119	760	902	397	12	228	672	0	0	1	0	0	0	SBF1	chr22:50898715-50898834
3608	1.64322	0.000435835	chr22	-	50899095	50899114	19	40	128	99	44	53	38	0	0	0	0	1	0	SBF1	chr22:50899095-50899114
3608	2.56569	0.000166916	chr22	-	50899135	50899194	59	204	115	200	94	0	0	1	0	0	0	0	0	SBF1	chr22:50899135-50899194
3608	2.01081	0.000834738	chr22	-	50899255	50899294	39	134	55	63	65	0	0	0	0	0	0	0	0	SBF1	chr22:50899255-50899294
3609	3.01923	0.000193666	chr22	-	50900312	50900511	199	998	854	515	314	74	0	3	1	0	0	0	0	SBF1	chr22:50900312-50900511
3609	4.22543	4.48583e-05	chr22	-	50900772	50901151	379	4284	3846	2847	1339	90	306	6	4	2	1	0	0	SBF1	chr22:50900772-50901151
3610	1.92037	0.000160918	chr22	-	50903257	50903336	79	384	562	277	228	70	228	1	0	1	0	0	0	SBF1	chr22:50903257-50903336
3611	2.09667	0.000383074	chr22	-	50904414	50904473	59	119	147	179	120	0	0	0	1	0	0	0	0	SBF1	chr22:50904414-50904473
3611	1.95724	0.000394987	chr22	-	50904534	50904673	139	160	68	176	0	0	1	0	0	0	0	0	0	SBF1	chr22:50904534-50904673
3611	2.02222	0.00022171	chr22	-	50904954	50905013	59	60	42	78	0	0	0	1	0	0	0	0	0	SBF1	chr22:50904954-50905013
3611	3.37797	3.82656e-05	chr22	-	50905754	50905873	119	662	561	398	77	153	0	2	1	0	0	0	0	SBF1	chr22:50905754-50905873
3611	1.64064	0.000294371	chr22	-	50905954	50906033	79	443	494	563	427	380	16	0	1	0	0	0	0	SBF1	chr22:50905954-50906033
1826	2.22703	0.000278965	chr22	+	50957050	50957129	79	187	258	135	2	48	80	0	1	0	0	0	0	NCAPH2	chr22:50957050-50957129
1826	6.46667	4.1773e-06	chr22	+	50957750	50957769	19	195	113	16	0	0	0	0	1	0	0	0	0	NCAPH2	chr22:50957750-50957769
1826	2.77941	0.000183888	chr22	+	50957810	50957829	19	160	118	40	20	40	16	0	0	0	0	0	0	NCAPH2	chr22:50957810-50957829
1826	1.97403	0.000206758	chr22	+	50957870	50957949	79	620	473	327	251	159	197	1	2	0	0	0	0	NCAPH2	chr22:50957870-50957949
1826	1.3151	0.000521908	chr22	+	50958010	50958109	99	924	712	660	980	357	329	0	0	0	0	2	0	NCAPH2	chr22:50958010-50958109
1829	2.08861	0.000224542	chr22	+	50962785	50962824	39	142	138	87	32	0	85	0	0	2	0	0	0	NCAPH2	chr22:50962785-50962824
1829	1.9037	0.000241586	chr22	+	50963045	50963164	119	455	727	514	391	159	170	0	0	0	0	0	0	NCAPH2	chr22:50963045-50963164
1829	2.61833	7.05241e-05	chr22	+	50963205	50963404	199	99	487	365	0	0	0	0	3	2	0	0	0	NCAPH2	chr22:50963205-50963404
8141	1.93929	0.00047241	chr3	+	9517652	9517731	79	360	1148	544	245	292	401	0	1	1	0	0	2	SETD5	chr3:9517652-9517731
17002	1.82778	0.00037308	chr3	-	9834260	9834319	59	42	56	51	0	0	0	0	0	0	0	0	0	TADA3	chr3:9834260-9834319
17031	2.09565	0.000523821	chr3	-	12874929	12874988	59	66	120	112	0	50	0	0	1	0	0	0	0	RPL32	chr3:12874929-12874988
8182	2.36585	0.000121559	chr3	+	14183294	14183353	59	177	120	105	6	60	0	0	0	0	0	0	0	TMEM43	chr3:14183294-14183353
8316	1.68889	0.000757696	chr3	+	45635621	45635680	59	60	20	44	0	0	0	0	0	0	0	0	0	LIMD1	chr3:45635621-45635680
8316	1.16412	0.000803151	chr3	+	45636141	45636200	59	611	422	457	724	296	230	0	0	1	2	0	0	LIMD1	chr3:45636141-45636200
8316	1.92029	0.00040862	chr3	+	45637181	45637220	39	205	114	87	103	53	0	1	0	0	0	0	0	LIMD1	chr3:45637181-45637220
17146	1.28742	0.000577988	chr3	-	47460912	47460951	39	357	299	196	205	226	200	0	0	0	0	0	1	SCAP	chr3:47460912-47460951
8322	1.83889	0.000404961	chr3	+	48488355	48488414	59	31	60	60	0	0	0	0	0	0	0	0	0	ATRIP	chr3:48488355-48488414
17176	1.95753	0.000434956	chr3	-	49053879	49053958	79	301	214	255	101	80	97	0	0	1	0	0	0	DALRD3	chr3:49053879-49053958
17176	2.96431	5.79344e-05	chr3	-	49055019	49055298	279	1491	1012	1371	578	49	130	1	1	3	0	0	0	DALRD3	chr3:49055019-49055298
17176	3.58559	0.000126356	chr3	-	49055419	49055498	79	304	482	160	0	0	89	1	1	0	0	0	1	DALRD3	chr3:49055419-49055498
17177	1.88993	9.85066e-05	chr3	-	49055961	49056020	59	553	439	228	179	321	57	1	1	0	1	1	0	MIR425 DALRD3	chr3:49055961-49056020
17177	2.18686	4.02237e-05	chr3	-	49056161	49056240	79	475	494	285	166	228	43	0	1	0	0	2	0	MIR425 MIR191 DALRD3	chr3:49056161-49056240
17177	1.47724	0.000649236	chr3	-	49058301	49058340	39	423	316	139	197	203	157	1	1	0	0	1	0	MIR425 MIR191 DALRD3	chr3:49058301-49058340
17177	2.16406	0.000154602	chr3	-	49058641	49058680	39	171	145	106	122	6	8	1	1	1	0	0	0	MIR425 MIR191 DALRD3	chr3:49058641-49058680
17177	1.45777	0.000442454	chr3	-	49058701	49058740	39	360	243	120	217	96	159	1	1	3	0	0	0	MIR425 MIR191 DALRD3	chr3:49058701-49058740
17180	2.3865	0.000104428	chr3	-	49066266	49066305	39	40	127	98	3	40	0	0	1	0	0	0	0	IMPDH2 QRICH1	chr3:49066266-49066305
8373	2.46041	6.25168e-05	chr3	+	53263613	53263692	79	160	250	181	0	101	0	0	0	2	0	0	0		chr3:53263613-53263692
8373	1.60131	0.000340226	chr3	+	53265053	53265092	39	191	263	157	178	110	51	0	1	0	0	0	0		chr3:53265053-53265092
8422	1.04344	0.000608916	chr3	+	75718455	75718494	39	906	707	393	1036	535	358	2	0	1	0	0	0		chr3:75718455-75718494
17311	1.71549	0.000440518	chr3	-	79068342	79068401	59	323	388	124	188	46	180	0	1	0	0	0	0	ROBO1	chr3:79068342-79068401
17355	2.6619	0.000181298	chr3	-	101395290	101395429	139	372	255	67	0	0	0	0	0	1	0	0	0	ZBTB11	chr3:101395290-101395429
17435	1.06804	0.000848689	chr3	-	121468305	121468324	19	134	224	253	376	120	76	0	0	1	0	0	0	GOLGB1	chr3:121468305-121468324
8583	2.54154	0.000129459	chr3	+	128445322	128445401	79	256	243	87	85	0	0	0	0	0	0	0	0	RAB7A	chr3:128445322-128445401
8583	2.14	2.20215e-05	chr3	+	128445502	128445601	99	147	96	99	0	0	0	0	0	0	0	0	0	RAB7A	chr3:128445502-128445601
17470	2.05	0.000177522	chr3	-	129031142	129031221	79	123	49	80	0	0	0	0	0	0	0	0	0		chr3:129031142-129031221
8609	1.15376	0.000525624	chr3	+	133292857	133292916	59	488	851	510	593	477	499	2	1	0	3	0	2	CDV3	chr3:133292857-133292916
17499	1.95294	0.000444662	chr3	-	135914219	135914238	19	140	60	60	80	10	20	1	2	0	0	0	0	MSL2	chr3:135914219-135914238
17499	2.73984	0.000119631	chr3	-	135914259	135914278	19	137	60	60	63	0	0	3	0	2	0	0	0	MSL2	chr3:135914259-135914278
17834	2.24167	8.58409e-05	chr3	-	148804404	148804483	79	160	43	91	0	0	0	1	0	0	0	0	0	HLTF	chr3:148804404-148804483
8692	1.94991	0.000110481	chr3	+	150126979	150127038	59	264	367	310	124	85	190	0	2	0	0	0	0	TSC22D2	chr3:150126979-150127038
8692	2.46939	0.000190052	chr3	+	150127599	150127718	119	499	566	503	39	198	187	1	0	1	0	0	0	TSC22D2	chr3:150127599-150127718
8692	2.00806	0.000188662	chr3	+	150127959	150128038	79	91	96	71	8	0	0	0	0	0	0	0	0	TSC22D2	chr3:150127959-150128038
8721	2.5503	4.10675e-05	chr3	+	153839912	153839951	39	128	91	88	49	0	0	0	0	1	0	0	0	ARHGEF26	chr3:153839912-153839951
8745	1.0603	0.000704003	chr3	+	160117680	160117719	39	466	480	486	643	293	413	5	3	4	2	1	7	SMC4	chr3:160117680-160117719
8745	1.36393	0.000303542	chr3	+	160117840	160117959	119	1701	1467	1102	1331	1009	713	4	0	5	1	1	0	SMC4	chr3:160117840-160117959
8745	1.92315	0.000431701	chr3	+	160117980	160118059	79	300	923	535	449	106	246	0	0	1	0	0	0	SMC4	chr3:160117980-160118059
8745	1.42746	7.53357e-05	chr3	+	160118080	160118119	39	446	862	599	817	221	258	0	0	0	0	0	1	SMC4	chr3:160118080-160118119
8745	0.975075	0.000838854	chr3	+	160118200	160118239	39	871	537	408	1179	408	291	2	2	1	1	1	0	SMC4	chr3:160118200-160118239
8745	1.38735	0.000883312	chr3	+	160118420	160118439	19	118	113	60	147	46	0	0	0	0	0	0	0	SMC4	chr3:160118420-160118439
8745	1.58763	0.000879612	chr3	+	160118540	160118559	19	101	42	101	126	8	0	0	0	1	0	0	0	SMC4	chr3:160118540-160118559
8745	1.76512	0.000285679	chr3	+	160118580	160118739	159	602	1189	695	1005	100	114	4	4	2	1	0	0	SMC4	chr3:160118580-160118739
8745	2.17269	0.000284386	chr3	+	160118780	160118859	79	410	260	160	189	43	26	1	2	0	0	0	0	SMC4	chr3:160118780-160118859
17956	1.66667	0.000973283	chr3	-	178979206	178979285	79	0	80	80	0	0	0	0	0	0	0	0	0	KCNMB3	chr3:178979206-178979285
9013	1.64363	0.000334266	chr3	+	184017227	184017346	119	511	784	477	400	318	216	0	2	0	1	1	0	PSMD2	chr3:184017227-184017346
9067	1.79205	0.000401066	chr3	+	193855441	193855580	139	714	624	759	447	274	268	0	2	0	0	0	0	HES1	chr3:193855441-193855580
18051	1.02631	0.000630248	chr3	-	195808292	195808351	59	1115	727	798	1296	543	716	3	3	1	5	4	1	TFRC	chr3:195808292-195808351
20427	3.69375	1.54684e-05	chr4	-	842651	842730	79	407	358	169	0	80	0	1	1	0	0	0	0	GAK	chr4:842651-842730
20429	2.54945	0.000129697	chr4	-	860712	860811	99	178	283	163	57	7	0	0	0	1	0	0	0	GAK	chr4:860712-860811
20430	2.53571	0.000167657	chr4	-	863971	864110	139	190	330	121	0	0	0	0	1	0	0	0	0	GAK	chr4:863971-864110
20430	2.40299	0.000135203	chr4	-	864231	864290	59	120	239	105	0	88	0	0	0	0	0	0	0	GAK	chr4:864231-864290
20431	2.47396	4.04707e-05	chr4	-	897036	897355	319	487	388	536	0	0	0	1	0	0	0	0	0	GAK	chr4:897036-897355
20431	2.455	6.1755e-05	chr4	-	897556	897635	79	319	279	140	80	80	0	0	0	1	0	0	0	GAK	chr4:897556-897635
20431	1.80269	0.000385426	chr4	-	897796	897915	119	327	471	583	374	170	64	0	1	0	0	0	0	GAK	chr4:897796-897915
20432	1.88166	2.71137e-05	chr4	-	925825	925924	99	862	1582	710	643	463	445	6	2	3	2	0	0	GAK	chr4:925825-925924
29356	2.23738	7.37942e-05	chr4	+	1379619	1379698	79	343	312	302	80	135	80	0	0	0	0	0	0	KIAA1530	chr4:1379619-1379698
29358	1.83816	0.000303575	chr4	+	1725474	1725573	99	401	390	431	169	147	212	0	0	0	0	0	0	TACC3	chr4:1725474-1725573
20446	1.50824	0.000162858	chr4	-	2763763	2763782	19	229	160	100	104	140	60	0	0	0	0	0	0		chr4:2763763-2763782
20446	1.68254	0.000522265	chr4	-	2763803	2763822	19	296	160	120	154	124	40	0	0	0	0	0	0		chr4:2763803-2763822
20448	2.31361	0.000155668	chr4	-	2941486	2941525	39	70	107	94	49	0	0	0	0	0	0	0	0	NOP14	chr4:2941486-2941525
20452	2.39792	3.1346e-05	chr4	-	2965558	2965717	159	146	366	147	0	0	0	2	1	0	0	0	0	NOP14	chr4:2965558-2965717
20453	2.44186	0.000315788	chr4	-	3514776	3514875	99	0	194	241	0	0	1	0	0	0	0	0	0	LRPAP1	chr4:3514776-3514875
20454	2.44669	0.000131759	chr4	-	3519167	3519246	79	155	214	240	32	0	75	0	0	0	0	0	0	LRPAP1	chr4:3519167-3519246
20454	2.80318	5.96576e-05	chr4	-	3519607	3519766	159	713	687	397	21	133	184	2	0	2	0	0	0	LRPAP1	chr4:3519607-3519766
20454	2.384	0.000257246	chr4	-	3520087	3520226	139	276	210	278	74	0	6	0	0	2	0	0	0	LRPAP1	chr4:3520087-3520226
29384	2.7289	0.000134975	chr4	+	4862154	4862333	179	362	431	183	0	17	0	1	0	0	0	0	0	MSX1	chr4:4862154-4862333
29388	2.11663	0.000262301	chr4	+	6675761	6675840	79	240	156	316	110	77	28	3	1	3	1	1	0	LOC93622	chr4:6675761-6675840
29389	2.19693	0.000222497	chr4	+	6676109	6676228	119	275	434	496	356	0	0	0	2	0	0	0	0	LOC93622	chr4:6676109-6676228
29389	3.34252	1.75311e-05	chr4	+	6676349	6676428	79	182	193	230	7	7	0	0	1	0	0	0	0	LOC93622	chr4:6676349-6676428
29404	1.76866	0.000757359	chr4	+	8442912	8442951	39	80	200	74	108	40	0	0	0	0	0	0	0	METTL19	chr4:8442912-8442951
20630	2.01667	0.000780118	chr4	-	49288884	49288943	59	120	60	120	0	60	0	1	0	0	0	0	0		chr4:49288884-49288943
20630	1.66667	0.000973283	chr4	-	49289584	49289643	59	0	60	60	0	0	0	0	0	0	0	0	0		chr4:49289584-49289643
29723	1.49734	0.000148023	chr4	+	49514542	49514641	99	1462	1747	1496	1008	1347	728	26	31	27	15	19	12		chr4:49514542-49514641
29723	1.07116	0.000589025	chr4	+	49515522	49515581	59	511	1080	489	9	1315	632	2	4	1	0	0	0		chr4:49515522-49515581
20753	1.09864	0.000698449	chr4	-	83294936	83294995	59	400	780	652	811	482	358	0	0	1	1	0	0	HNRNPD	chr4:83294936-83294995
29835	1.10988	0.000425134	chr4	+	83295569	83295608	39	679	671	407	595	667	338	3	3	2	0	0	0		chr4:83295569-83295608
20830	1.64516	0.000528548	chr4	-	102268050	102268089	39	197	184	107	138	34	80	0	0	1	0	0	0	PPP3CA	chr4:102268050-102268089
30150	2.37968	8.28639e-05	chr4	+	134070386	134070445	59	118	60	87	7	0	0	0	0	0	0	0	0	PCDH10	chr4:134070386-134070445
21057	1.76667	0.000566305	chr4	-	140222489	140222548	59	60	0	70	0	0	0	2	0	0	0	0	0	NDUFC1	chr4:140222489-140222548
30515	3.72736	4.42219e-05	chr4	+	190986972	190987091	119	1171	1151	1134	374	238	55	1	1	1	0	0	0	DUX2	chr4:190986972-190987091
30525	1.75625	0.00052949	chr5	+	471717	471756	39	217	120	101	120	40	40	0	1	0	0	0	0		chr5:471717-471756
30526	2.33452	0.000129031	chr5	+	766447	766526	79	226	106	80	0	0	41	0	0	1	0	0	0		chr5:766447-766526
30527	2.42993	0.000186651	chr5	+	766741	767060	319	943	886	1035	105	297	215	0	2	0	0	0	0		chr5:766741-767060
30527	2.61933	0.000120234	chr5	+	767261	767480	219	449	490	178	23	0	0	2	1	0	0	0	0		chr5:767261-767480
9094	2.07839	0.000272101	chr5	-	863596	863675	79	160	380	197	152	0	80	1	0	0	0	0	0	BRD9	chr5:863596-863675
9097	2.8046	5.35835e-05	chr5	-	1137920	1137959	39	92	208	64	0	52	2	0	1	0	0	0	0		chr5:1137920-1137959
9098	2.01131	0.000458189	chr5	-	1172170	1172249	79	247	204	186	202	0	0	2	1	0	0	0	0		chr5:1172170-1172249
30530	2.02222	0.000595658	chr5	+	1326759	1326818	59	152	128	82	0	90	0	0	1	0	0	0	0		chr5:1326759-1326818
30530	6.28442	1.03819e-06	chr5	+	1326979	1327558	579	3251	4323	2407	125	9	0	5	8	1	0	0	0		chr5:1326979-1327558
30530	3.49898	1.99854e-05	chr5	+	1327619	1327778	159	1069	1113	777	0	261	239	1	0	0	0	1	0		chr5:1327619-1327778
30530	2.84915	0.000105094	chr5	+	1327859	1328278	419	869	1033	984	0	64	141	4	2	1	0	0	0		chr5:1327859-1328278
30530	2.35556	1.51343e-05	chr5	+	1328579	1328638	59	60	67	117	0	0	0	0	0	0	0	0	0		chr5:1328579-1328638
30530	2.39754	3.51204e-05	chr5	+	1328739	1328818	79	91	126	124	0	0	4	1	0	0	0	0	0		chr5:1328739-1328818
30530	2.18543	0.00043738	chr5	+	1328959	1328978	19	32	131	103	20	15	56	0	0	1	0	0	0		chr5:1328959-1328978
30530	2.682	0.000127939	chr5	+	1329019	1329138	119	248	895	538	4	164	233	0	0	0	0	0	0		chr5:1329019-1329138
30530	2.47334	8.93576e-05	chr5	+	1329259	1329378	119	700	499	339	259	118	32	1	0	0	0	0	0		chr5:1329259-1329378
30530	4.48015	2.57008e-05	chr5	+	1329419	1329818	399	2121	1946	1803	191	78	118	6	2	2	0	0	0		chr5:1329419-1329818
30530	4.71747	2.78363e-05	chr5	+	1329859	1330138	279	1764	3312	2076	424	0	442	2	7	5	0	0	0		chr5:1329859-1330138
30694	2.41739	0.000159813	chr5	+	32710790	32710869	79	593	612	215	239	80	131	1	1	0	0	0	0	NPR3	chr5:32710790-32710869
30884	0.986306	0.0006052	chr5	+	77080824	77080883	59	1045	1092	900	1249	953	892	2	3	1	2	1	0		chr5:77080824-77080883
10093	2.04945	0.000326919	chr5	-	111755751	111755810	59	60	92	41	0	0	2	0	0	0	0	0	0	EPB41L4A	chr5:111755751-111755810
31129	2.49682	9.01711e-05	chr5	+	127419992	127420031	39	66	111	95	0	32	5	0	0	0	0	0	0	SLC12A2	chr5:127419992-127420031
31197	2.53608	5.398e-05	chr5	+	137801244	137801963	719	8492	5828	6136	4856	1249	664	12	12	6	3	4	2	EGR1	chr5:137801244-137801963
31197	2.43941	0.000188878	chr5	+	137802164	137802283	119	604	347	650	242	97	110	2	1	5	1	0	1	EGR1	chr5:137802164-137802283
31197	3.08866	2.57388e-05	chr5	+	137802344	137803423	1079	13888	14744	9995	3225	4631	2521	26	18	10	0	1	1	EGR1	chr5:137802344-137803423
31247	1.66667	0.000845259	chr5	+	140070961	140071020	59	60	0	60	0	0	0	0	0	0	0	0	0	HARS2	chr5:140070961-140071020
31267	2.16585	0.000252462	chr5	+	140746172	140746211	39	160	120	40	85	0	0	0	1	0	0	0	0	PCDHGB2 PCDHGB1 PCDHGA4 PCDHGA5 PCDHGA3 PCDHGA2 PCDHGA1	chr5:140746172-140746211
31282	1.27957	0.000597419	chr5	+	142150397	142150416	19	116	196	100	112	40	160	1	0	0	0	0	0	ARHGAP26	chr5:142150397-142150416
31373	1.39085	0.000331307	chr5	+	170883787	170883866	79	513	974	550	562	390	448	0	0	1	0	0	0	FGF18	chr5:170883787-170883866
10323	1.77222	0.000769121	chr5	-	176941850	176941909	59	60	0	79	0	0	0	0	0	0	0	0	0	DDX41	chr5:176941850-176941909
31412	2.09341	0.000267145	chr5	+	177398336	177398395	59	27	60	106	0	0	2	0	1	1	0	0	0		chr5:177398336-177398395
31414	1.83951	0.000238474	chr5	+	177631781	177631880	99	758	434	590	616	0	214	0	0	1	0	0	1	HNRNPAB	chr5:177631781-177631880
31419	1.66667	0.000845259	chr5	+	177659279	177659358	79	80	0	80	0	0	0	0	0	0	0	0	0		chr5:177659279-177659358
31420	2.52066	0.000108085	chr5	+	177659897	177659996	99	320	233	335	85	99	0	2	5	1	0	0	0		chr5:177659897-177659996
10331	1.58123	0.000242516	chr5	-	179049838	179049857	19	122	130	126	40	53	124	0	0	0	0	0	0	HNRNPH1	chr5:179049838-179049857
10332	1.80226	0.000325298	chr5	-	179050334	179050373	39	180	250	80	163	31	40	2	0	0	0	0	0	HNRNPH1	chr5:179050334-179050373
21416	0.997573	0.000857381	chr6	+	30552044	30552083	39	654	480	386	584	534	410	1	0	0	0	0	0	ABCF1 MIR877	chr6:30552044-30552083
23725	2.48193	5.87649e-05	chr6	-	30569360	30569399	39	80	103	109	3	40	3	0	0	0	0	0	0	PPP1R10	chr6:30569360-30569399
23726	2.05678	0.000176388	chr6	-	30569728	30569787	59	420	171	344	61	212	93	1	1	0	0	0	0	PPP1R10	chr6:30569728-30569787
23726	1.59284	0.000473904	chr6	-	30569948	30570027	79	269	453	462	490	66	98	0	0	0	0	0	0	PPP1R10	chr6:30569948-30570027
23726	1.65351	0.00024188	chr6	-	30570308	30570327	19	98	164	55	106	40	22	0	0	0	0	0	0	PPP1R10	chr6:30570308-30570327
23744	1.14229	0.00068744	chr6	-	30711849	30711868	19	140	255	123	202	60	180	0	0	0	0	1	0	FLOT1 IER3	chr6:30711849-30711868
21435	1.94922	0.000380857	chr6	+	31170252	31170291	39	136	150	89	96	0	40	0	1	0	0	0	0	HCG27	chr6:31170252-31170291
21459	1.37165	0.000943091	chr6	+	31600296	31600335	39	203	197	188	346	56	0	1	1	0	0	0	0	PRRC2A	chr6:31600296-31600335
21459	1.75988	0.000371783	chr6	+	31600536	31600595	59	452	277	249	191	214	69	0	0	0	1	0	0	PRRC2A	chr6:31600536-31600595
21477	1.04508	0.000254042	chr6	+	32940821	32940900	79	3008	2354	2395	3716	2159	1547	5	5	2	4	3	2	BRD2	chr6:32940821-32940900
21514	2.29774	0.000320963	chr6	+	35027471	35027630	159	358	347	339	185	0	0	0	0	1	0	0	0	ANKS1A	chr6:35027471-35027630
21518	2.31667	0.000124214	chr6	+	35435983	35436122	139	100	297	140	0	0	0	0	4	0	0	0	0	FANCE RPL10A	chr6:35435983-35436122
21518	1.6109	0.000349585	chr6	+	35436323	35436382	59	458	448	202	522	49	52	1	1	1	1	0	0	FANCE RPL10A	chr6:35436323-35436382
21518	2.25	0.00016484	chr6	+	35436523	35436562	39	218	153	72	123	0	9	0	0	1	0	0	0	FANCE RPL10A	chr6:35436523-35436562
21518	1.88184	0.000128232	chr6	+	35436643	35436742	99	1175	761	718	807	178	306	4	3	3	0	0	0	FANCE RPL10A	chr6:35436643-35436742
21572	1.78066	0.000245116	chr6	+	43139638	43139697	59	298	345	204	178	179	38	0	1	0	0	1	0	SRF	chr6:43139638-43139697
21576	2.58841	0.000150366	chr6	+	43191177	43191256	79	343	148	162	0	73	32	0	0	0	0	0	0	CUL9	chr6:43191177-43191256
21612	1.50989	0.000117827	chr6	+	52529314	52529413	99	860	935	1251	871	769	276	1	1	1	0	1	1	LOC730101	chr6:52529314-52529413
24076	1.77143	0.000458691	chr6	-	86303664	86303743	79	261	296	377	10	177	238	1	0	0	0	0	0	SNX14	chr6:86303664-86303743
24099	2.05495	0.000527674	chr6	-	88182603	88182642	39	102	112	40	51	0	11	0	0	0	0	0	0		chr6:88182603-88182642
24124	1.77609	0.000269578	chr6	-	88411389	88411488	99	359	703	490	286	293	175	2	1	2	0	0	0	AKIRIN2	chr6:88411389-88411488
24124	2.0625	0.00028373	chr6	-	88411549	88411628	79	191	464	351	253	91	20	0	2	0	1	0	0	AKIRIN2	chr6:88411549-88411628
24124	1.26632	0.000455767	chr6	-	88411709	88411768	59	507	534	465	511	437	183	6	3	1	3	6	4	AKIRIN2	chr6:88411709-88411768
24268	1.68889	0.00084911	chr6	-	111135648	111135707	59	0	60	60	0	0	0	0	0	1	0	0	0	CDK19	chr6:111135648-111135707
24383	2.41265	0.000331007	chr6	-	139695213	139695292	79	291	156	106	92	0	0	2	0	0	0	0	0	CITED2	chr6:139695213-139695292
24435	1.64706	0.000345198	chr6	-	157703516	157703715	199	1355	1132	1101	322	833	795	1	1	1	0	0	0		chr6:157703516-157703715
24435	2.70127	0.000130678	chr6	-	157703856	157703955	99	108	408	251	47	0	48	0	0	0	0	0	0		chr6:157703856-157703955
24457	1.75244	0.00020273	chr6	-	160209858	160209877	19	96	162	220	121	80	46	0	0	0	0	0	0	TCP1	chr6:160209858-160209877
24457	2.02059	0.000474413	chr6	-	160210278	160210377	99	553	274	427	154	257	58	2	1	1	1	1	0	TCP1	chr6:160210278-160210377
22359	2.25417	0.00019734	chr6	+	167413009	167413168	159	213	183	198	0	0	0	0	1	1	0	0	0	FGFR1OP	chr6:167413009-167413168
22371	1.29412	0.000786078	chr6	+	168352495	168352514	19	120	120	140	100	80	100	0	0	0	0	0	0	MLLT4	chr6:168352495-168352514
18339	1.76593	0.000231782	chr7	+	935010	935089	79	470	350	539	227	34	405	2	0	0	0	0	1	GET4	chr7:935010-935089
18339	2.80764	0.000105345	chr7	+	935470	935649	179	655	558	520	202	69	0	0	0	1	0	0	0	GET4	chr7:935470-935649
18339	1.96667	0.00029978	chr7	+	936350	936409	59	49	99	26	0	0	0	0	0	0	0	0	0	GET4	chr7:936350-936409
3619	2.90952	6.23303e-05	chr7	-	1152997	1153136	139	243	325	234	0	0	0	0	0	0	0	0	0	C7orf50	chr7:1152997-1153136
3619	2.42439	0.000235958	chr7	-	1153457	1153516	59	87	117	113	0	17	8	0	0	0	0	0	0	C7orf50	chr7:1153457-1153516
3623	2.61065	0.000436977	chr7	-	1489985	1490104	119	245	682	278	67	0	170	0	1	0	0	0	1	MICALL2	chr7:1489985-1490104
3624	2.45556	0.000142384	chr7	-	1492113	1492172	59	60	174	28	0	0	0	0	0	0	0	0	0	MICALL2	chr7:1492113-1492172
3624	2.32031	0.000376898	chr7	-	1492313	1492372	59	85	123	198	60	12	0	0	1	1	1	0	0	MICALL2	chr7:1492313-1492372
3626	3.06875	3.67236e-06	chr7	-	1510276	1510355	79	221	316	193	80	0	0	0	3	0	0	0	0	INTS1	chr7:1510276-1510355
3626	2.71212	9.82336e-05	chr7	-	1510536	1510635	99	270	174	143	20	10	0	1	1	0	0	0	0	INTS1	chr7:1510536-1510635
3626	2.92773	0.000164705	chr7	-	1510896	1511035	139	409	661	248	0	31	144	0	0	1	0	0	0	INTS1	chr7:1510896-1511035
3626	2.06667	0.000334052	chr7	-	1511236	1511295	59	89	0	103	0	0	0	0	0	0	0	0	0	INTS1	chr7:1511236-1511295
3627	2.16111	0.000374701	chr7	-	1512115	1512174	59	0	120	89	0	0	0	0	0	0	0	0	0	INTS1	chr7:1512115-1512174
3627	2.63539	0.00017469	chr7	-	1512295	1512434	139	194	444	154	0	49	0	1	3	2	0	0	0	INTS1	chr7:1512295-1512434
3627	2.85836	2.52149e-05	chr7	-	1512535	1512634	99	281	256	172	6	47	0	0	0	0	0	0	0	INTS1	chr7:1512535-1512634
3628	1.98947	0.00065621	chr7	-	1513389	1513428	39	106	115	37	70	0	0	0	0	0	0	0	0	INTS1	chr7:1513389-1513428
3628	1.95298	0.000625622	chr7	-	1513609	1513668	59	180	179	84	111	28	0	0	0	0	0	0	0	INTS1	chr7:1513609-1513668
3628	1.76111	0.000675475	chr7	-	1514029	1514088	59	17	60	60	0	0	0	0	0	0	0	0	0	INTS1	chr7:1514029-1514088
3629	2.56201	0.000131912	chr7	-	1516221	1516320	99	254	321	96	74	5	0	0	0	0	0	0	0	INTS1	chr7:1516221-1516320
3630	3.31608	0.000152182	chr7	-	1521900	1521999	99	478	137	298	67	0	0	0	0	1	0	0	0	INTS1	chr7:1521900-1521999
3630	2.74164	3.20253e-05	chr7	-	1522040	1522179	139	442	690	244	234	0	0	0	1	1	1	0	0	INTS1	chr7:1522040-1522179
3630	2.72549	0.00053685	chr7	-	1522260	1522339	79	326	114	428	161	7	0	1	0	0	0	0	0	INTS1	chr7:1522260-1522339
3630	2.1808	0.000281209	chr7	-	1522880	1522999	119	260	339	392	150	115	0	0	1	2	0	0	0	INTS1	chr7:1522880-1522999
3630	3.33862	0.000120467	chr7	-	1523020	1523179	159	513	593	299	87	0	0	0	2	0	0	0	0	INTS1	chr7:1523020-1523179
3630	2.26291	0.000120384	chr7	-	1523340	1523379	39	140	106	116	42	0	51	0	0	0	0	0	0	INTS1	chr7:1523340-1523379
3630	2.60101	0.00015089	chr7	-	1523440	1523579	139	363	409	345	174	0	0	1	0	1	0	0	0	INTS1	chr7:1523440-1523579
3630	2.27149	0.000177294	chr7	-	1523620	1523679	59	166	76	72	41	0	0	0	0	2	0	0	0	INTS1	chr7:1523620-1523679
3631	1.91667	0.000729939	chr7	-	1526426	1526505	79	140	0	80	0	0	0	0	0	0	0	0	0	INTS1	chr7:1526426-1526505
3631	1.72081	0.000978329	chr7	-	1526866	1526885	19	40	115	124	118	0	19	0	0	0	0	0	0	INTS1	chr7:1526866-1526885
3631	2.08516	0.000116029	chr7	-	1526906	1526945	39	127	234	266	204	0	40	3	0	0	0	0	0	INTS1	chr7:1526906-1526945
3631	2.52991	0.000163508	chr7	-	1526966	1527125	159	531	700	645	331	95	30	0	1	2	0	0	0	INTS1	chr7:1526966-1527125
3632	2.42174	5.44779e-05	chr7	-	1527266	1527385	119	300	260	194	0	100	0	0	0	0	0	0	0	INTS1	chr7:1527266-1527385
3633	2.21667	0.000286538	chr7	-	1528540	1528599	59	176	108	60	0	0	60	0	1	1	0	0	0	INTS1	chr7:1528540-1528599
3633	3.07303	4.06279e-05	chr7	-	1528620	1528739	119	441	465	287	72	0	94	7	7	8	1	0	1	INTS1	chr7:1528620-1528739
3634	2.09444	0.000110226	chr7	-	1533133	1533192	59	88	60	49	0	0	0	0	0	0	0	0	0	INTS1	chr7:1533133-1533192
3634	2.53333	0.000454843	chr7	-	1533713	1533792	79	27	109	228	0	0	0	1	0	0	0	0	0	INTS1	chr7:1533713-1533792
3634	2.75842	8.28188e-05	chr7	-	1534193	1534312	119	349	455	213	29	116	0	1	3	0	0	0	0	INTS1	chr7:1534193-1534312
3634	2.60188	3.37516e-05	chr7	-	1534393	1534472	79	184	311	75	75	0	0	1	3	1	1	0	0	INTS1	chr7:1534393-1534472
3635	2.44444	1.09911e-05	chr7	-	1536295	1536354	59	116	87	53	0	0	0	0	1	0	0	0	0	INTS1	chr7:1536295-1536354
3635	4.56687	2.02436e-05	chr7	-	1536495	1536654	159	437	955	408	21	0	0	1	0	1	0	0	0	INTS1	chr7:1536495-1536654
3635	2.10116	0.000295243	chr7	-	1536675	1536734	59	133	186	224	166	0	0	0	0	1	0	0	0	INTS1	chr7:1536675-1536734
3635	1.60825	0.000560698	chr7	-	1536935	1536954	19	57	118	77	84	40	10	0	0	0	0	0	0	INTS1	chr7:1536935-1536954
3635	2.18216	9.2757e-05	chr7	-	1537815	1537894	79	299	318	317	0	144	154	0	0	0	0	0	0	INTS1	chr7:1537815-1537894
3636	1.93846	0.000231599	chr7	-	1539144	1539243	99	556	394	258	349	126	5	1	0	0	0	0	0	INTS1	chr7:1539144-1539243
3636	2.45469	0.000198747	chr7	-	1539464	1539563	99	387	528	383	153	104	94	0	0	0	0	0	0	INTS1	chr7:1539464-1539563
3640	2.32167	0.000124613	chr7	-	2014787	2014986	199	379	126	280	0	0	0	1	0	1	0	0	0	MAD1L1	chr7:2014787-2014986
3642	1.66667	0.000845259	chr7	-	2269508	2269567	59	60	0	60	0	0	0	0	0	0	0	0	0	MAD1L1	chr7:2269508-2269567
18344	0.894303	0.000832423	chr7	+	2394866	2394885	19	404	464	265	876	248	150	0	0	0	0	0	0	EIF3B	chr7:2394866-2394885
18352	2.3	5.18786e-06	chr7	+	2417724	2417783	59	53	117	60	0	0	0	0	1	0	0	0	0	EIF3B	chr7:2417724-2417783
18352	1.9314	0.000538619	chr7	+	2418964	2419023	59	114	285	153	89	19	87	0	0	0	0	0	1	EIF3B	chr7:2418964-2419023
18355	3.895	0.000568458	chr7	+	4820813	4820852	39	40	353	258	80	0	0	0	2	0	0	0	0	AP5Z1	chr7:4820813-4820852
18356	2.62745	0.000294136	chr7	+	4822911	4822990	79	179	380	131	80	0	33	0	1	1	0	0	1	AP5Z1	chr7:4822911-4822990
18356	1.95935	0.000428289	chr7	+	4823051	4823090	39	143	111	108	65	0	61	0	0	0	0	0	0	AP5Z1	chr7:4823051-4823090
18357	1.79217	0.000363185	chr7	+	4830116	4830155	39	128	186	157	132	40	40	0	0	1	0	0	0	AP5Z1	chr7:4830116-4830155
18360	1.82028	0.000206019	chr7	+	5085831	5086030	199	933	1656	938	1031	206	457	3	8	3	1	0	0	RBAK RBAK-LOC389458	chr7:5085831-5086030
3649	2.70871	0.000112587	chr7	-	5540327	5540506	179	485	601	441	136	93	0	0	3	1	0	0	0	FBXL18	chr7:5540327-5540506
18363	2.26111	0.000108179	chr7	+	5632919	5632978	59	156	306	172	180	0	0	0	0	0	0	0	0	FSCN1	chr7:5632919-5632978
18363	2.59729	3.71638e-05	chr7	+	5633319	5633398	79	221	336	351	142	0	60	0	0	0	0	0	0	FSCN1	chr7:5633319-5633398
3860	2.34836	1.4904e-05	chr7	-	23509487	23509566	79	176	77	80	4	0	0	0	0	0	0	0	0	IGF2BP3	chr7:23509487-23509566
3924	2.53696	0.000165522	chr7	-	30544096	30544175	79	80	129	191	17	0	0	0	2	1	0	0	0	GGCT	chr7:30544096-30544175
19261	1.67994	0.000403043	chr7	+	36194280	36194399	119	651	625	508	633	191	97	0	1	1	0	0	0	EEPD1	chr7:36194280-36194399
19261	1.24205	0.000628312	chr7	+	36194540	36194599	59	319	563	446	837	160	42	0	1	3	2	0	0	EEPD1	chr7:36194540-36194599
3996	2.16474	0.000142338	chr7	-	44924354	44924493	139	688	606	709	426	183	94	0	1	1	0	0	0	PURB	chr7:44924354-44924493
3996	2.37352	0.000613587	chr7	-	44924734	44924873	139	735	190	643	346	40	40	3	2	0	0	0	0	PURB	chr7:44924734-44924873
4023	2.81727	4.65052e-05	chr7	-	56441162	56441341	179	3614	5779	3951	2736	760	890	6	10	5	6	1	1		chr7:56441162-56441341
19381	1.85081	0.000658015	chr7	+	66147580	66147619	39	96	172	71	46	0	82	0	0	0	0	0	0		chr7:66147580-66147619
4078	2.34877	0.00013306	chr7	-	73114403	73114482	79	232	150	139	11	71	2	0	0	0	0	0	0	STX1A	chr7:73114403-73114482
4078	2.25556	0.000123246	chr7	-	73114643	73114702	59	106	120	0	0	0	0	0	0	0	0	0	0	STX1A	chr7:73114643-73114702
19431	1.15646	0.000974138	chr7	+	77325950	77325969	19	101	170	179	219	74	84	0	0	0	1	0	0	RSBN1L	chr7:77325950-77325969
19431	2.18284	0.000303189	chr7	+	77326050	77326109	59	156	161	84	28	60	0	0	0	1	0	0	0	RSBN1L	chr7:77326050-77326109
4123	2.61479	1.24005e-05	chr7	-	84569218	84569357	139	2617	2213	2182	1775	254	404	2	2	3	0	0	0		chr7:84569218-84569357
19804	1.40486	0.000817154	chr7	+	99949713	99949732	19	60	156	71	127	20	40	0	0	0	0	0	0	PILRB	chr7:99949713-99949732
19804	1.39761	0.000365512	chr7	+	99949753	99949872	119	944	1210	507	999	373	441	1	1	2	0	0	0	PILRB	chr7:99949753-99949872
19805	1.78261	0.000530067	chr7	+	99949978	99950017	39	113	147	153	99	40	40	0	0	0	0	0	0	PILRB	chr7:99949978-99950017
19805	1.20968	0.000702202	chr7	+	99950258	99950277	19	188	143	134	253	60	57	0	0	0	1	0	0	PILRB	chr7:99950258-99950277
19805	1.19752	0.000564787	chr7	+	99951098	99951137	39	385	393	256	477	160	210	0	1	0	0	0	0	PILRB	chr7:99951098-99951137
19805	1.96241	0.000317137	chr7	+	99954818	99954857	39	170	112	120	19	76	51	0	0	0	0	0	0	PILRB	chr7:99954818-99954857
19805	1.14798	0.000703801	chr7	+	99955818	99955877	59	339	734	504	383	590	373	0	1	0	0	2	0	PILRB	chr7:99955818-99955877
19805	1.26437	0.000874911	chr7	+	99955898	99955917	19	87	135	150	128	128	32	0	0	2	0	0	0	PILRB	chr7:99955898-99955917
19818	2.53992	0.000382414	chr7	+	100274916	100274995	79	51	186	191	21	2	0	0	0	0	0	0	0	GNB2	chr7:100274916-100274995
19818	1.85556	0.000814617	chr7	+	100275616	100275675	59	0	90	60	0	0	0	0	1	0	0	0	0	GNB2	chr7:100275616-100275675
19818	2.55	0.000122177	chr7	+	100275936	100275995	59	208	57	167	60	0	0	0	0	0	0	0	0	GNB2	chr7:100275936-100275995
19830	2.31496	9.85486e-05	chr7	+	100485524	100485603	79	77	128	143	0	0	14	0	0	0	0	0	0	SRRT	chr7:100485524-100485603
19848	1.38333	0.000822633	chr7	+	102087438	102087477	39	260	199	164	113	160	147	0	0	1	0	0	0	ORAI2	chr7:102087438-102087477
19855	2.70236	3.84162e-05	chr7	+	102938010	102938109	99	438	272	232	82	85	0	4	1	0	0	0	0	PMPCB	chr7:102938010-102938109
19855	1.64578	0.000562143	chr7	+	102938170	102938209	39	200	155	121	107	140	0	1	1	0	0	0	0	PMPCB	chr7:102938170-102938209
4293	1.92918	0.000187104	chr7	-	106300728	106300767	39	186	119	256	174	19	40	0	0	0	0	0	0	CCDC71L	chr7:106300728-106300767
4293	2.24583	0.000205453	chr7	-	106300808	106300847	39	83	154	178	120	0	0	1	0	0	0	0	0	CCDC71L	chr7:106300808-106300847
19908	1.27888	0.000287305	chr7	+	112090982	112091241	259	4631	3819	2715	4468	2450	1659	6	13	3	5	4	4	IFRD1	chr7:112090982-112091241
19908	1.21283	0.000584349	chr7	+	112091262	112091361	99	857	1083	489	1599	164	197	0	2	1	0	0	0	IFRD1	chr7:112091262-112091361
20353	2.90347	8.02132e-06	chr7	+	148937091	148937170	79	165	159	184	0	0	19	0	1	0	0	0	0	ZNF212	chr7:148937091-148937170
20380	1.92462	0.000218278	chr7	+	155089836	155089955	119	518	513	512	296	275	60	0	2	1	0	1	0	INSIG1	chr7:155089836-155089955
4794	2.15278	0.000190361	chr7	-	156432385	156432504	119	189	124	98	0	0	0	1	0	0	0	0	0	C7orf13	chr7:156432385-156432504
4794	2.50667	0.000122553	chr7	-	156432545	156432644	99	177	142	133	0	0	0	0	0	0	0	0	0	C7orf13	chr7:156432545-156432644
20385	1.10054	0.000836303	chr7	+	156742936	156742955	19	140	212	193	277	140	80	0	0	2	0	0	0	NOM1	chr7:156742936-156742955
33883	1.36538	0.000899013	chr8	-	22476336	22476395	59	357	408	120	240	120	240	0	0	0	0	0	0	BIN3	chr8:22476336-22476395
33883	1.98419	0.000297774	chr8	-	22476916	22476955	39	108	191	83	54	49	30	0	0	0	0	0	0	BIN3	chr8:22476916-22476955
33884	1.77222	0.000696495	chr8	-	22487197	22487256	59	75	60	0	0	0	0	1	0	0	0	0	0	BIN3	chr8:22487197-22487256
33887	2.2451	0.000472628	chr8	-	22864858	22864897	39	166	324	77	101	40	45	0	0	0	0	0	0		chr8:22864858-22864897
33894	2.25765	0.000286658	chr8	-	22926018	22926097	79	183	459	512	80	221	80	0	0	2	0	0	0	TNFRSF10B	chr8:22926018-22926097
33894	1.39801	0.000142477	chr8	-	22926698	22926797	99	952	1233	1582	1084	805	715	1	0	0	1	1	0	TNFRSF10B	chr8:22926698-22926797
33899	1.50293	0.000438714	chr8	-	23021040	23021079	39	361	178	350	240	190	120	3	0	1	2	0	1	TNFRSF10D	chr8:23021040-23021079
33899	1.38591	0.000485197	chr8	-	23021100	23021179	79	573	519	478	535	436	95	0	0	0	0	0	0	TNFRSF10D	chr8:23021100-23021179
15089	1.66667	0.000973283	chr8	+	28611152	28611211	59	0	60	60	0	0	0	0	0	0	0	0	0	EXTL3	chr8:28611152-28611211
15115	1.66667	0.000973283	chr8	+	37622971	37623030	59	0	60	60	0	0	0	0	0	0	0	0	0	PROSC	chr8:37622971-37623030
33993	1.72222	0.000747855	chr8	-	48694666	48694725	59	0	70	60	0	0	0	0	0	0	0	0	0	PRKDC	chr8:48694666-48694725
34082	1.33622	0.000418526	chr8	-	56986783	56986842	59	378	812	629	518	480	317	0	0	1	1	0	0	RPS20 SNORD54	chr8:56986783-56986842
15375	1.76258	0.000344492	chr8	+	82193147	82193346	199	1151	1101	877	612	720	183	3	2	0	0	3	0	FABP5	chr8:82193147-82193346
15375	1.23009	0.00056489	chr8	+	82193807	82193826	19	196	160	140	140	132	120	0	0	0	0	0	0	FABP5	chr8:82193807-82193826
34282	2.22376	0.000153298	chr8	-	82598550	82598669	119	248	50	147	0	1	1	0	0	0	0	0	0	IMPA1	chr8:82598550-82598669
34514	1.95088	4.46172e-05	chr8	-	94746563	94746682	119	841	1429	805	982	195	234	1	3	1	0	0	0	RBM12B	chr8:94746563-94746682
34514	1.21988	0.000810695	chr8	-	94746743	94746802	59	414	558	235	521	384	48	0	0	0	0	1	0	RBM12B	chr8:94746743-94746802
16031	1.16145	0.000613782	chr8	+	98656828	98656887	59	776	415	557	795	276	409	0	0	0	0	0	0	MTDH	chr8:98656828-98656887
34684	2.71458	0.000230114	chr8	-	100708761	100708840	79	357	569	148	186	0	61	0	2	0	0	0	0		chr8:100708761-100708840
34776	2.58333	0.000138649	chr8	-	101118017	101118096	79	0	228	148	0	0	0	0	1	0	0	0	0	RGS22	chr8:101118017-101118096
34776	2.44167	6.48771e-06	chr8	-	101118317	101118396	79	190	80	76	0	0	0	0	0	0	0	0	0	RGS22	chr8:101118317-101118396
34802	2.74167	0.000745891	chr8	-	101225295	101225334	39	234	264	40	80	40	0	0	0	0	0	0	0		chr8:101225295-101225334
34802	2.15078	0.000597755	chr8	-	101225355	101225434	79	206	382	138	131	80	0	1	0	0	0	0	0		chr8:101225355-101225434
34945	1.7216	0.000193305	chr8	-	101733186	101733345	159	2873	2119	1740	1567	1236	918	4	6	2	3	1	0	PABPC1	chr8:101733186-101733345
34945	2.77897	9.79406e-05	chr8	-	101733446	101733525	79	260	302	473	0	152	70	1	1	3	0	0	1	PABPC1	chr8:101733446-101733525
34946	1.13164	0.000157942	chr8	-	101733785	101734104	319	17087	18202	16350	21191	14385	10076	44	42	35	36	22	16	PABPC1	chr8:101733785-101734104
34987	2.03587	0.000360059	chr8	-	103424971	103425010	39	129	120	49	87	0	16	4	4	1	0	0	0	UBR5	chr8:103424971-103425010
35190	2.49107	5.70734e-05	chr8	-	110986343	110986402	59	58	215	97	0	0	44	0	0	2	0	0	0	KCNV1	chr8:110986343-110986402
35190	1.65409	0.000907889	chr8	-	110986763	110986802	39	144	99	163	106	56	36	0	0	0	0	0	0	KCNV1	chr8:110986763-110986802
16289	1.81323	0.000737004	chr8	+	120886591	120886630	39	80	116	146	78	40	19	1	0	0	0	0	0	DEPTOR	chr8:120886591-120886630
16338	1.33333	0.000959671	chr8	+	128750698	128750717	19	120	100	100	68	97	60	0	0	0	0	0	0	MYC	chr8:128750698-128750717
16338	1.18102	0.000420403	chr8	+	128750758	128750837	79	1331	795	1376	1489	784	665	1	1	2	0	1	0	MYC	chr8:128750758-128750837
16338	1.50244	0.000813328	chr8	+	128750958	128750997	39	120	272	104	130	40	120	0	0	0	0	0	0	MYC	chr8:128750958-128750997
36143	1.63092	0.000402204	chr8	-	131073067	131073146	79	516	684	232	196	368	231	0	3	1	0	0	0	ASAP1	chr8:131073067-131073146
36145	2.0058	8.14669e-05	chr8	-	131370013	131370252	239	2032	1618	1469	1194	729	290	4	3	4	0	0	0	ASAP1	chr8:131370013-131370252
36147	1.22329	0.000369652	chr8	-	134251083	134251322	239	5148	6396	4672	6731	3619	2804	9	10	1	8	1	0	NDRG1	chr8:134251083-134251322
36149	2.275	6.60413e-06	chr8	-	134265311	134265390	79	158	73	75	0	0	0	0	0	0	0	0	0	NDRG1	chr8:134265311-134265390
36154	1.50639	0.000156066	chr8	-	134296499	134296558	59	722	581	276	344	240	405	1	0	1	1	0	0	NDRG1	chr8:134296499-134296558
36155	1.87715	0.000440557	chr8	-	134300771	134300830	59	194	202	180	167	0	60	2	0	0	0	0	0	NDRG1	chr8:134300771-134300830
36156	1.75601	0.000626661	chr8	-	134301550	134301589	39	120	200	63	75	0	96	1	0	1	0	0	0	NDRG1	chr8:134301550-134301589
36160	1.95417	0.000494457	chr8	-	134582902	134582981	79	80	145	0	0	0	0	1	0	0	0	0	0	ST3GAL1	chr8:134582902-134582981
36180	1.83333	0.000395558	chr8	-	142229836	142229895	59	60	60	22	0	0	0	1	1	0	0	0	0	SLC45A4	chr8:142229836-142229895
16385	1.66667	0.000845259	chr8	+	142431242	142431301	59	60	0	60	0	0	0	0	0	0	0	0	0	PTP4A3	chr8:142431242-142431301
36186	3.37421	1.04731e-05	chr8	-	144408505	144408624	119	603	306	323	12	33	68	1	0	0	0	0	0	TOP1MT	chr8:144408505-144408624
36187	2.01988	0.000140471	chr8	-	144509227	144509326	99	395	595	405	392	0	155	1	5	2	2	0	0	MAFA	chr8:144509227-144509326
36187	3.04142	0.000168521	chr8	-	144509627	144509726	99	353	82	293	0	0	38	0	0	0	0	0	0	MAFA	chr8:144509627-144509726
36187	2.35678	0.000246724	chr8	-	144509787	144509826	39	154	56	139	20	19	40	0	0	0	0	0	0	MAFA	chr8:144509787-144509826
36187	2.2947	0.000167132	chr8	-	144509847	144509906	59	212	120	177	60	57	1	1	0	0	0	1	0	MAFA	chr8:144509847-144509906
36187	2.12143	0.00017507	chr8	-	144510087	144510186	99	609	449	416	253	183	100	0	1	1	0	1	0	MAFA	chr8:144510087-144510186
36188	2.34451	9.23921e-05	chr8	-	144511128	144511227	99	871	734	1418	468	304	359	4	3	1	0	0	0	MAFA	chr8:144511128-144511227
36188	2.68259	2.83962e-05	chr8	-	144511268	144511407	139	1372	1258	828	618	249	170	3	5	5	2	0	0	MAFA	chr8:144511268-144511407
36189	2.22568	0.00019907	chr8	-	144511634	144511813	179	3405	2233	1307	1632	574	622	2	3	0	1	0	0	MAFA	chr8:144511634-144511813
36191	2	0.000460749	chr8	-	144655443	144655502	59	0	120	60	0	0	0	0	0	0	0	0	0	C8orf73 NAPRT1	chr8:144655443-144655502
36191	2.08611	0.000416218	chr8	-	144656383	144656462	79	142	238	131	59	61	0	0	0	0	0	0	0	C8orf73 NAPRT1	chr8:144656383-144656462
36191	2.6537	0.000292041	chr8	-	144656923	144657062	139	306	376	246	12	82	0	1	0	3	0	0	0	NAPRT1	chr8:144656923-144657062
36192	2.25	3.19575e-05	chr8	-	144661712	144661811	99	70	187	118	0	0	0	0	0	0	0	0	0	EEF1D NAPRT1	chr8:144661712-144661811
36192	2.95556	1.50616e-07	chr8	-	144661832	144661891	59	115	57	180	0	0	0	0	0	0	0	0	0	EEF1D NAPRT1	chr8:144661832-144661891
36193	1.9599	0.000302797	chr8	-	144663513	144663572	59	234	214	154	176	43	0	0	0	0	0	0	0	EEF1D	chr8:144663513-144663572
36193	1.3293	0.000490879	chr8	-	144667833	144667872	39	383	242	240	367	131	126	0	1	0	0	0	0	EEF1D	chr8:144667833-144667872
36193	1.63324	0.000742751	chr8	-	144668073	144668112	39	163	150	133	160	0	69	0	0	1	0	0	0	EEF1D	chr8:144668073-144668112
36193	2.03297	0.000946322	chr8	-	144668153	144668172	19	66	184	60	76	0	46	0	0	0	0	0	0	EEF1D	chr8:144668153-144668172
36193	2.1483	0.000262519	chr8	-	144668213	144668292	79	302	1020	520	380	232	119	1	0	0	0	0	0	EEF1D	chr8:144668213-144668292
36194	2.30961	0.000263529	chr8	-	144671421	144671480	59	190	176	103	0	22	79	0	0	0	0	0	0	EEF1D	chr8:144671421-144671480
36194	1.70879	0.0004107	chr8	-	144671841	144671860	19	80	135	36	62	20	40	0	0	0	0	0	0	EEF1D	chr8:144671841-144671860
36196	1.77188	0.000598677	chr8	-	144679333	144679372	39	96	208	240	102	155	0	1	0	0	0	0	0	EEF1D	chr8:144679333-144679372
36197	2.547	0.000275601	chr8	-	144688051	144688210	159	348	436	385	51	0	118	1	0	0	0	0	0	PYCRL	chr8:144688051-144688210
36199	2.5	5.95965e-05	chr8	-	144694550	144694649	99	159	204	87	0	0	0	0	0	0	0	0	0	TSTA3	chr8:144694550-144694649
36200	2.22632	0.000195611	chr8	-	144697119	144697178	59	60	60	119	10	0	0	1	0	0	0	0	0	TSTA3	chr8:144697119-144697178
36200	2	5.22587e-05	chr8	-	144697359	144697418	59	60	60	60	0	0	0	0	0	0	0	0	0	TSTA3	chr8:144697359-144697418
16395	1.31178	0.000368574	chr8	+	144776426	144776525	99	1060	1176	1112	1072	1073	339	0	1	0	0	0	0	ZNF707	chr8:144776426-144776525
16395	1.89982	0.000166392	chr8	+	144776806	144776905	99	626	489	720	369	368	91	1	0	1	0	0	0	ZNF707	chr8:144776806-144776905
16396	1.92778	0.000360782	chr8	+	144779643	144779762	119	96	162	64	0	0	0	1	1	1	0	0	0	BREA2	chr8:144779643-144779762
16399	2.09167	8.41567e-05	chr8	+	144810998	144811077	79	73	63	126	0	0	0	0	0	0	0	0	0		chr8:144810998-144811077
36201	5.3593	2.704e-06	chr8	-	144873464	144873643	179	1378	1312	1020	249	7	0	2	1	1	0	0	0	SCRIB	chr8:144873464-144873643
36201	3.10556	2.85806e-05	chr8	-	144873784	144873903	119	54	437	267	0	0	0	0	0	0	0	0	0	SCRIB	chr8:144873784-144873903
36201	2.82258	2.4001e-05	chr8	-	144873924	144874143	219	471	582	538	142	0	0	0	3	3	1	0	0	SCRIB	chr8:144873924-144874143
36202	2.62522	4.80232e-05	chr8	-	144885824	144885963	139	922	896	707	439	237	38	4	3	1	0	0	0	SCRIB	chr8:144885824-144885963
36202	2.07273	0.000360257	chr8	-	144886084	144886143	59	226	180	86	140	6	0	0	2	1	1	0	0	SCRIB	chr8:144886084-144886143
36202	2.49667	0.000139681	chr8	-	144886224	144886323	99	211	193	37	0	0	0	2	0	0	0	0	0	SCRIB	chr8:144886224-144886323
36202	2.4625	6.87106e-05	chr8	-	144886584	144886643	59	126	180	101	60	0	0	0	1	0	0	0	0	SCRIB	chr8:144886584-144886643
36203	2.4591	0.000111616	chr8	-	144887229	144887328	99	207	174	251	45	0	34	0	0	0	0	0	0	SCRIB	chr8:144887229-144887328
36203	2.16528	0.000164995	chr8	-	144887489	144887628	139	968	715	488	396	186	202	1	3	0	0	0	0	SCRIB	chr8:144887489-144887628
36203	3.10556	8.12969e-05	chr8	-	144887769	144887888	119	323	378	57	0	0	0	0	0	0	0	0	0	SCRIB	chr8:144887769-144887888
36204	2.23204	0.000366358	chr8	-	144888091	144888290	199	638	661	517	316	166	0	1	1	0	0	1	0	SCRIB	chr8:144888091-144888290
36204	2.89965	1.49541e-05	chr8	-	144888351	144888510	159	617	238	300	88	0	0	2	1	0	0	0	0	SCRIB	chr8:144888351-144888510
36204	1.75758	0.00052887	chr8	-	144889171	144889230	59	207	338	105	128	30	129	3	4	3	3	2	2	SCRIB	chr8:144889171-144889230
36204	2.34524	0.00021132	chr8	-	144890111	144890250	139	200	269	92	0	0	0	0	0	1	0	0	0	SCRIB	chr8:144890111-144890250
36205	1.73115	0.00021837	chr8	-	144891715	144891854	139	1045	1007	531	852	341	112	0	1	0	2	1	0	SCRIB	chr8:144891715-144891854
36205	1.94444	0.000190284	chr8	-	144892095	144892154	59	37	60	69	0	0	0	1	0	0	0	0	0	SCRIB	chr8:144892095-144892154
36206	4.46339	3.40747e-05	chr8	-	144892488	144893227	739	5074	6195	3479	1044	214	338	8	9	8	1	1	0	SCRIB	chr8:144892488-144893227
36206	1.59916	0.000290607	chr8	-	144893348	144893547	199	1467	1650	831	1099	620	531	0	3	1	1	0	0	MIR937 SCRIB	chr8:144893348-144893547
36207	1.88856	0.000693538	chr8	-	144893762	144893821	59	199	119	142	64	60	37	1	0	0	0	0	0	MIR937 SCRIB	chr8:144893762-144893821
36207	2.04839	0.00070701	chr8	-	144894202	144894261	59	116	70	142	36	23	9	0	0	0	0	0	0	MIR937 SCRIB	chr8:144894202-144894261
36207	2.25937	0.00030355	chr8	-	144894402	144894481	79	146	199	138	0	80	0	0	0	0	0	0	0	MIR937 SCRIB	chr8:144894402-144894481
36208	2.31878	0.000130939	chr8	-	144898131	144898490	359	458	646	467	0	0	65	1	0	0	0	0	0	PUF60 SCRIB	chr8:144898131-144898490
36211	2.47273	0.000140695	chr8	-	144920200	144920239	39	144	39	105	40	0	5	0	0	0	0	0	0	NRBP2	chr8:144920200-144920239
36211	3.93077	0.000226209	chr8	-	144920640	144920719	79	109	177	496	0	0	20	0	0	0	0	0	0	NRBP2	chr8:144920640-144920719
36212	2.35638	3.36202e-05	chr8	-	144940228	144940367	139	4066	3984	2027	2141	1081	804	3	3	3	2	1	3	EPPK1	chr8:144940228-144940367
36212	3.4549	4.73155e-05	chr8	-	144940388	144940827	439	12013	7793	7250	3972	1734	1214	18	8	4	1	0	1	EPPK1	chr8:144940388-144940827
36212	1.64915	0.000242695	chr8	-	144941188	144941547	359	2290	3380	2285	1228	2114	1068	3	3	2	0	1	1	EPPK1	chr8:144941188-144941547
36212	1.5856	0.000159099	chr8	-	144942208	144942307	99	748	1091	826	892	237	434	1	1	0	3	0	0	EPPK1	chr8:144942208-144942307
36212	2.18533	0.000351052	chr8	-	144942428	144942527	99	672	363	300	275	147	24	0	1	0	1	0	0	EPPK1	chr8:144942428-144942527
36212	1.20291	0.000362974	chr8	-	144942608	144942667	59	846	644	472	976	264	360	0	1	0	1	0	0	EPPK1	chr8:144942608-144942667
36212	1.54109	0.000701812	chr8	-	144942748	144942807	59	246	264	300	211	89	165	0	1	0	0	0	0	EPPK1	chr8:144942748-144942807
36212	2.0623	0.000159288	chr8	-	144943208	144943307	99	397	740	430	375	154	82	1	3	1	1	0	0	EPPK1	chr8:144943208-144943307
36212	3.17336	0.000147407	chr8	-	144943808	144943907	99	495	298	404	3	132	38	0	0	1	0	0	0	EPPK1	chr8:144943808-144943907
36212	1.34593	0.000529073	chr8	-	144943948	144943967	19	161	123	119	120	140	20	0	0	0	0	1	0	EPPK1	chr8:144943948-144943967
36212	1.96488	0.000567233	chr8	-	144944088	144944167	79	381	156	282	192	28	81	1	0	0	0	0	0	EPPK1	chr8:144944088-144944167
36212	2.1375	0.000132511	chr8	-	144944208	144944267	59	289	232	325	150	60	90	0	0	0	0	0	0	EPPK1	chr8:144944208-144944267
36212	1.7004	0.000551807	chr8	-	144944308	144944367	59	206	337	113	144	97	73	0	0	1	0	0	0	EPPK1	chr8:144944308-144944367
36212	1.81126	0.00013098	chr8	-	144944788	144944927	139	970	890	902	449	440	450	0	0	1	0	0	0	EPPK1	chr8:144944788-144944927
36212	1.78689	0.000332875	chr8	-	144945048	144945147	99	509	344	583	382	294	0	0	1	1	0	0	0	EPPK1	chr8:144945048-144945147
36212	2.08333	0.000162468	chr8	-	144945448	144945507	59	442	289	160	115	76	145	1	0	0	0	0	0	EPPK1	chr8:144945448-144945507
36212	1.56517	0.000488267	chr8	-	144945528	144945607	79	618	386	253	354	239	114	0	1	0	0	3	0	EPPK1	chr8:144945528-144945607
36212	1.73452	9.87591e-05	chr8	-	144945688	144945847	159	1854	1997	1477	1390	945	537	1	3	1	1	1	0	EPPK1	chr8:144945688-144945847
36212	1.66419	0.000249599	chr8	-	144946828	144946927	99	575	761	376	577	222	110	0	0	0	0	0	0	EPPK1	chr8:144946828-144946927
36212	2.03933	9.27154e-05	chr8	-	144947008	144947107	99	431	617	359	356	182	1	1	0	0	0	0	0	EPPK1	chr8:144947008-144947107
36212	1.75701	0.000196876	chr8	-	144947308	144947327	19	140	80	96	94	40	20	0	0	0	0	0	0	EPPK1	chr8:144947308-144947327
36212	2.24615	0.000243457	chr8	-	144947788	144947827	39	77	163	74	75	0	0	0	1	0	0	0	0	EPPK1	chr8:144947788-144947827
36213	2.55	9.01683e-05	chr8	-	144949712	144949831	119	477	440	551	120	0	240	1	0	1	0	0	0		chr8:144949712-144949831
36213	2.31359	9.48603e-05	chr8	-	144951532	144951651	119	489	276	195	36	71	107	0	1	1	0	0	0		chr8:144951532-144951651
36215	2.60278	2.41799e-06	chr8	-	144962290	144962409	119	221	190	162	0	0	0	0	0	1	0	0	0		chr8:144962290-144962409
36215	2.7	2.83583e-05	chr8	-	144964490	144964569	79	234	80	94	0	0	0	0	0	0	0	0	0		chr8:144964490-144964569
36215	2.93333	3.81667e-05	chr8	-	144964590	144964689	99	139	239	202	0	0	0	0	0	0	0	0	0		chr8:144964590-144964689
36215	3.46172	2.40505e-05	chr8	-	144964710	144964949	239	662	961	531	101	0	15	0	2	3	0	0	0		chr8:144964710-144964949
36215	1.91416	0.000628587	chr8	-	144964970	144965009	39	45	137	144	40	33	40	0	0	0	0	0	0		chr8:144964970-144965009
36215	2.94847	8.2129e-05	chr8	-	144965050	144965189	139	552	380	189	34	58	12	0	1	0	0	0	0		chr8:144965050-144965189
36215	2.33667	0.000100417	chr8	-	144965230	144965289	59	233	228	60	60	0	60	0	0	0	0	0	0		chr8:144965230-144965289
36215	2.33125	0.000159538	chr8	-	144965310	144965349	39	65	107	81	0	0	40	0	0	0	0	0	0		chr8:144965310-144965349
36217	1.89051	0.000433692	chr8	-	144977890	144977929	39	134	180	80	40	74	40	0	1	0	0	0	0		chr8:144977890-144977929
36220	2.33685	6.41053e-05	chr8	-	144984723	144984962	239	2570	1714	1610	1115	779	226	5	2	1	0	1	0		chr8:144984723-144984962
36220	2.19345	7.21462e-05	chr8	-	144986043	144986302	259	2767	2046	1942	1352	824	484	6	0	1	1	1	0		chr8:144986043-144986302
36220	2.972	3.17919e-05	chr8	-	144987123	144987202	79	625	337	276	68	20	160	1	1	0	1	0	2		chr8:144987123-144987202
36220	1.79054	0.00049884	chr8	-	144987303	144987342	39	194	148	68	120	16	40	0	0	0	0	0	0	PLEC	chr8:144987303-144987342
36220	2.64301	9.74983e-05	chr8	-	144987383	144987542	159	1122	1059	973	307	321	269	0	3	1	0	1	0	PLEC	chr8:144987383-144987542
36220	3.88804	8.46988e-05	chr8	-	144987603	144987762	159	726	894	948	302	0	0	0	1	1	1	0	0	PLEC	chr8:144987603-144987762
36220	2.40354	5.07264e-05	chr8	-	144988143	144988262	119	519	821	738	259	167	226	0	0	1	1	0	0	PLEC	chr8:144988143-144988262
36220	2.10879	0.000193895	chr8	-	144988703	144988742	39	82	142	160	0	80	39	0	0	0	0	0	0	PLEC	chr8:144988703-144988742
36220	1.98453	0.000392491	chr8	-	144988843	144988922	79	269	229	284	160	56	61	0	0	1	0	0	0	PLEC	chr8:144988843-144988922
36220	2.58445	0.000106027	chr8	-	144989043	144989142	99	312	214	134	12	29	32	0	0	1	0	0	0	PLEC	chr8:144989043-144989142
36220	1.64505	0.000194168	chr8	-	144989183	144989202	19	156	206	60	40	60	133	0	0	0	0	0	0	PLEC	chr8:144989183-144989202
36220	1.71522	0.00028742	chr8	-	144989343	144989442	99	776	490	526	393	364	172	1	2	1	0	0	0	PLEC	chr8:144989343-144989442
36220	2.09152	3.26678e-05	chr8	-	144989463	144990062	599	7415	7585	6350	5056	2273	1960	10	11	19	11	1	2	PLEC	chr8:144989463-144990062
36220	2.20201	8.92275e-05	chr8	-	144990083	144990182	99	1328	840	567	344	429	318	1	2	4	0	0	0	PLEC	chr8:144990083-144990182
36220	3.42891	4.84101e-06	chr8	-	144990223	144990422	199	1132	1042	1559	59	318	291	6	1	7	1	1	1	PLEC	chr8:144990223-144990422
36220	2.60733	7.93303e-05	chr8	-	144990443	144990582	139	1280	1284	1487	748	184	395	4	6	11	0	0	0	PLEC	chr8:144990443-144990582
36220	1.88227	0.000182583	chr8	-	144990623	144990982	359	4586	5101	3378	3362	886	2194	3	6	0	1	0	2	PLEC	chr8:144990623-144990982
36220	2.44113	4.36554e-05	chr8	-	144991003	144991502	499	10654	8218	6367	6142	2055	1295	16	13	14	4	0	4	PLEC	chr8:144991003-144991502
36220	1.70309	5.80506e-05	chr8	-	144991523	144991822	299	8880	7255	6491	5703	4446	2799	6	6	6	0	1	1	PLEC	chr8:144991523-144991822
36220	1.53452	8.79801e-05	chr8	-	144991883	144992062	179	5225	3468	2982	4423	1765	1237	2	4	2	3	0	1	PLEC	chr8:144991883-144992062
36220	2.30627	0.000178153	chr8	-	144992123	144992322	199	3447	3030	1885	1562	740	995	5	1	5	1	0	1	PLEC	chr8:144992123-144992322
36220	2.28168	4.68989e-05	chr8	-	144992343	144992982	639	12443	11016	7854	7318	2361	3006	16	18	7	3	1	4	PLEC	chr8:144992343-144992982
36220	1.09491	0.000360226	chr8	-	144993123	144993242	119	2852	2328	1992	3342	1501	1681	4	2	3	3	1	3	PLEC	chr8:144993123-144993242
36220	2.31875	3.80366e-06	chr8	-	144993283	144993802	519	21659	19051	14137	10726	5431	6665	24	25	11	5	4	3	PLEC	chr8:144993283-144993802
36220	2.37711	3.25538e-05	chr8	-	144993863	144996102	2239	53787	40562	32528	24909	13063	11599	77	44	32	15	18	9	PLEC	chr8:144993863-144996102
36220	1.93399	0.000244051	chr8	-	144996143	144996182	39	309	148	210	135	66	88	1	0	0	0	0	0	PLEC	chr8:144996143-144996182
36220	2.50804	2.69439e-05	chr8	-	144996243	144996562	319	5220	4887	3681	2916	797	1228	6	6	6	1	0	1	PLEC	chr8:144996243-144996562
36221	2.12186	9.15641e-05	chr8	-	144996669	144997328	659	14005	15760	8810	6560	5518	5080	13	10	3	1	0	5	PLEC	chr8:144996669-144997328
36221	1.23296	0.00026184	chr8	-	144997349	144997368	19	324	274	120	176	235	160	0	0	0	0	0	0	PLEC	chr8:144997349-144997368
36221	3.79618	4.52298e-05	chr8	-	144997429	145000188	2759	56972	51758	34962	16098	8698	7056	74	45	32	8	1	6	PLEC	chr8:144997429-145000188
36221	3.83168	0.000127482	chr8	-	145000209	145000348	139	1574	1332	532	375	211	4	1	1	1	0	0	0	PLEC	chr8:145000209-145000348
36221	2.93915	5.62154e-05	chr8	-	145000369	145000888	519	4324	3490	3065	1468	580	653	13	9	8	3	0	0	PLEC	chr8:145000369-145000888
36221	2.13833	1.92629e-05	chr8	-	145000929	145001048	119	1232	1544	759	480	425	560	1	2	1	1	0	0	PLEC	chr8:145000929-145001048
36221	2.06699	0.000247083	chr8	-	145001169	145001308	139	1319	978	665	885	235	102	1	1	1	0	0	0	PLEC	chr8:145001169-145001308
36221	1.35411	0.000474183	chr8	-	145001349	145001368	19	205	105	100	145	60	80	0	2	0	1	0	1	PLEC	chr8:145001349-145001368
36221	2.94204	4.67313e-05	chr8	-	145001429	145001648	219	2360	2415	1944	1423	188	240	2	2	4	2	0	0	PLEC	chr8:145001429-145001648
36221	2.51868	3.68395e-05	chr8	-	145001689	145001788	99	882	540	562	313	197	100	1	1	0	0	0	0	PLEC	chr8:145001689-145001788
36221	1.41372	0.000515406	chr8	-	145001849	145001908	59	445	420	221	484	240	0	1	2	0	0	0	0	PLEC	chr8:145001849-145001908
36221	2.11152	0.000404218	chr8	-	145002009	145002068	59	178	79	131	89	0	0	0	0	0	0	0	0	PLEC	chr8:145002009-145002068
36221	2.46667	0.000842301	chr8	-	145002129	145002168	39	365	115	210	170	0	40	1	0	0	0	0	0	PLEC	chr8:145002129-145002168
36221	1.84076	0.000690319	chr8	-	145002349	145002428	79	147	229	247	8	87	136	1	0	0	0	0	0	PLEC	chr8:145002349-145002428
36221	2.64216	0.000225846	chr8	-	145002609	145002748	139	445	321	719	78	68	155	0	0	0	0	0	0	PLEC	chr8:145002609-145002748
36221	2.14112	0.00033065	chr8	-	145002849	145002988	139	265	313	401	84	5	150	1	1	1	0	0	0	PLEC	chr8:145002849-145002988
36221	2.525	0.000125961	chr8	-	145003229	145003268	39	83	80	121	0	0	40	0	0	0	0	0	0	PLEC	chr8:145003229-145003268
36221	1.52193	0.000483748	chr8	-	145003289	145003328	39	388	226	299	364	118	82	1	0	1	0	0	0	PLEC	chr8:145003289-145003328
36221	1.66017	0.000266614	chr8	-	145003589	145003668	79	418	431	437	471	213	0	0	2	0	0	0	0	PLEC	chr8:145003589-145003668
36221	1.30523	0.000688706	chr8	-	145003829	145003848	19	130	117	118	157	20	107	4	2	0	0	0	0	PLEC	chr8:145003829-145003848
36221	1.56856	0.000300043	chr8	-	145003869	145004008	139	901	1114	1073	853	86	876	0	0	1	0	0	1	PLEC	chr8:145003869-145004008
36221	2.92529	8.08272e-05	chr8	-	145004089	145004228	139	531	438	647	184	0	92	0	0	0	0	0	0	PLEC	chr8:145004089-145004228
36221	2.59194	5.43044e-05	chr8	-	145004369	145004468	99	422	424	334	271	0	0	0	0	0	0	0	0	PLEC	chr8:145004369-145004468
36221	2.77748	5.66454e-06	chr8	-	145004569	145004668	99	854	1315	573	656	141	0	2	2	0	1	0	0	PLEC	chr8:145004569-145004668
36221	3.93034	4.36217e-05	chr8	-	145004689	145004788	99	572	408	461	138	7	0	2	0	0	0	0	0	PLEC	chr8:145004689-145004788
36222	2.32712	0.000375603	chr8	-	145005649	145005728	79	426	286	156	89	18	136	2	2	0	0	0	0	PLEC	chr8:145005649-145005728
36222	1.66398	0.000561601	chr8	-	145005769	145005808	39	242	146	111	92	40	120	0	0	0	0	0	0	PLEC	chr8:145005769-145005808
36222	2.34066	0.000354486	chr8	-	145005849	145005968	119	276	277	365	30	0	156	0	0	0	0	0	0	PLEC	chr8:145005849-145005968
36222	2.28788	0.000155387	chr8	-	145006029	145006148	119	458	476	212	23	263	14	0	1	0	0	0	0	PLEC	chr8:145006029-145006148
36223	2.14913	1.28915e-05	chr8	-	145006580	145006719	139	1264	1326	1664	633	750	383	2	0	4	0	0	0	PLEC	chr8:145006580-145006719
36223	2.55212	0.000186779	chr8	-	145006780	145006859	79	86	180	151	19	0	0	0	0	1	0	0	0	PLEC	chr8:145006780-145006859
36224	3.67892	7.86375e-06	chr8	-	145006969	145007528	559	6892	8031	5514	2395	811	1145	9	7	9	0	2	0	PLEC	chr8:145006969-145007528
36224	1.68376	0.000576637	chr8	-	145007869	145007908	39	193	99	163	80	31	120	3	1	0	0	0	0	PLEC	chr8:145007869-145007908
36224	2.53333	0.000123893	chr8	-	145008129	145008188	59	103	144	25	0	0	0	0	1	0	0	0	0	PLEC	chr8:145008129-145008188
36224	2.35667	5.33564e-06	chr8	-	145008369	145008468	99	142	100	157	0	0	0	1	0	1	0	0	0	PLEC	chr8:145008369-145008468
36224	2.31351	0.000134332	chr8	-	145008489	145008588	99	499	720	336	274	40	193	0	3	0	0	0	0	PLEC	chr8:145008489-145008588
36225	2.10183	0.000452584	chr8	-	145008735	145008854	119	85	231	125	23	0	0	0	0	1	0	0	0	PLEC	chr8:145008735-145008854
36225	2.46597	9.25356e-05	chr8	-	145008995	145009074	79	266	220	216	57	85	0	0	0	0	0	0	0	PLEC	chr8:145008995-145009074
36225	2.38889	0.000127742	chr8	-	145009095	145009174	79	235	212	83	4	80	0	1	0	0	0	0	0	PLEC	chr8:145009095-145009174
36225	2.23013	5.47781e-05	chr8	-	145009355	145009474	119	1062	1280	769	700	295	205	2	0	0	0	0	0	PLEC	chr8:145009355-145009474
36225	2.60625	3.39552e-05	chr8	-	145009615	145009654	39	71	155	71	0	0	40	0	0	0	0	0	0	PLEC	chr8:145009615-145009654
36226	1.499	0.00029705	chr8	-	145010039	145010198	159	1404	936	932	1052	348	627	3	0	0	0	0	1	PLEC	chr8:145010039-145010198
36226	2.15354	0.000323289	chr8	-	145010399	145010438	39	190	191	46	94	0	40	0	0	0	0	0	0	PLEC	chr8:145010399-145010438
36226	2.58993	0.000256752	chr8	-	145010479	145010558	79	311	407	114	124	3	50	1	0	1	0	0	0	PLEC	chr8:145010479-145010558
36226	4.21377	2.49105e-06	chr8	-	145010699	145010938	239	1757	2129	1804	629	29	147	2	1	1	0	0	0	PLEC	chr8:145010699-145010938
36226	3.31	0.000659917	chr8	-	145010999	145011058	59	386	380	47	60	56	0	0	0	0	0	1	0	PLEC	chr8:145010999-145011058
[truncated: 449 more rows]

## Sheet: ECs(p<0.05)
id	fold	pval	chr	strand	start	end	EC length	Total_P1	Total_P2	Total_P3	Total_I1	Total_I2	Total_I3	Mutant_P1	Mutant_P2	Mutant_P3	Mutant_I1	Mutant_I2	Mutant_I3	gene	chromosome:position
36293	2.195	0.0030094	chr1	-	879368	879567	199	0	348	349	0	0	0	0	1	4	0	0	0	NOC2L	chr1:879368-879567
36293	0.37685	0.044729	chr1	-	879988	880007	19	565	540	414	1959	1160	1003	0	0	0	1	1	0	NOC2L	chr1:879988-880007
36294	0.97522	0.0144228	chr1	-	880449	880568	119	323	215	322	357	126	400	0	0	0	1	0	1	NOC2L	chr1:880449-880568
36294	1.84409	0.0125742	chr1	-	881029	881128	99	78	76	232	18	15	39	0	0	0	0	0	0	NOC2L	chr1:881029-881128
36294	1.65746	0.0106977	chr1	-	881149	881288	139	229	283	264	6	111	187	1	0	0	0	0	0	NOC2L	chr1:881149-881288
36294	0.670399	0.0123902	chr1	-	881569	881668	99	797	756	1017	2321	813	845	0	0	1	1	0	1	NOC2L	chr1:881569-881668
36295	1.71893	0.012446	chr1	-	887519	887598	79	117	72	148	18	79	1	1	0	0	0	0	0	NOC2L	chr1:887519-887598
36295	2.29893	0.00554396	chr1	-	887619	887778	159	359	212	237	0	82	0	1	0	0	0	0	0	NOC2L	chr1:887619-887778
36295	1.79444	0.023292	chr1	-	887979	888078	99	4	109	233	15	2	43	0	0	0	0	0	0	NOC2L	chr1:887979-888078
36295	2.91506	0.00315561	chr1	-	888279	888398	119	587	337	210	105	53	0	2	2	0	0	0	0	NOC2L	chr1:888279-888398
36295	1.14527	0.0229355	chr1	-	888419	888678	259	816	1090	290	1021	547	242	0	1	0	1	0	2	NOC2L	chr1:888419-888678
36295	1.7034	0.00494364	chr1	-	888699	888858	159	423	691	647	381	119	341	1	2	1	1	0	0	NOC2L	chr1:888699-888858
36295	1.9589	0.00762813	chr1	-	888939	889258	319	813	1078	422	397	82	240	0	2	2	0	0	0	NOC2L	chr1:888939-889258
36296	0.655433	0.0174812	chr1	-	891484	891583	99	478	851	448	1470	857	540	1	0	0	2	0	0	NOC2L	chr1:891484-891583
36297	0.794091	0.0236512	chr1	-	892312	892451	139	421	536	370	716	409	651	0	0	0	0	1	0	NOC2L	chr1:892312-892451
36298	0.624453	0.0345653	chr1	-	894321	894420	99	642	347	418	1290	796	346	1	0	0	1	0	1	NOC2L	chr1:894321-894420
36298	1.39015	0.0136234	chr1	-	894481	894580	99	129	205	96	43	185	0	1	0	0	0	0	0	NOC2L	chr1:894481-894580
36300	1.9955	0.00161979	chr1	-	1007752	1007891	139	621	364	357	229	158	82	3	0	0	0	0	0	RNF223	chr1:1007752-1007891
36300	1.42544	0.011057	chr1	-	1008012	1008271	259	1228	1093	462	638	789	293	1	0	2	2	0	0	RNF223	chr1:1008012-1008271
36300	1.57107	0.0111452	chr1	-	1008312	1008391	79	62	196	121	69	0	85	0	0	0	0	0	0	RNF223	chr1:1008312-1008391
36300	0.748188	0.0403338	chr1	-	1008472	1008511	39	133	78	82	235	77	120	0	0	0	0	0	0	RNF223	chr1:1008472-1008511
36301	1.03931	0.0339745	chr1	-	1153237	1153316	79	80	140	201	80	107	205	0	0	0	1	0	0	SDF4	chr1:1153237-1153316
36301	1.86427	0.0206341	chr1	-	1153517	1153676	159	452	237	430	5	122	255	1	0	1	0	0	0	SDF4	chr1:1153517-1153676
36301	1.24513	0.00915492	chr1	-	1153737	1153856	119	651	348	294	506	312	152	2	0	0	1	0	0	SDF4	chr1:1153737-1153856
36301	0.911502	0.00992466	chr1	-	1153897	1154336	439	2161	2258	1995	2667	2607	1914	1	5	2	2	0	1	SDF4	chr1:1153897-1154336
36302	1.47531	0.0151342	chr1	-	1155057	1155156	99	100	175	142	0	60	126	0	0	0	0	0	0	SDF4	chr1:1155057-1155156
36302	2.05457	0.00177701	chr1	-	1155477	1155636	159	525	176	325	245	0	8	0	0	0	0	0	0	SDF4	chr1:1155477-1155636
36302	2.31978	0.0185212	chr1	-	1155797	1155896	99	393	92	63	69	0	0	2	0	0	0	0	0	SDF4	chr1:1155797-1155896
36302	0.828378	0.0254264	chr1	-	1156097	1156176	79	474	259	249	193	621	426	0	1	0	0	0	0	SDF4	chr1:1156097-1156176
36302	1.08409	0.00559833	chr1	-	1156577	1156696	119	807	1011	806	970	552	873	1	4	0	3	1	0	SDF4	chr1:1156577-1156696
36304	1.04762	0.0284372	chr1	-	1157791	1157890	99	210	138	210	271	148	100	0	0	0	0	0	0	SDF4	chr1:1157791-1157890
36304	0.60274	0.0359255	chr1	-	1158631	1158730	99	372	563	177	546	714	781	2	6	2	5	5	7	SDF4	chr1:1158631-1158730
36306	0.492353	0.0227732	chr1	-	1163861	1164000	139	2055	2371	941	6957	2183	2182	0	2	0	5	0	2	SDF4	chr1:1163861-1164000
36306	0.486192	0.0410945	chr1	-	1164021	1164100	79	385	680	430	1673	970	698	1	0	1	1	0	0	SDF4	chr1:1164021-1164100
36307	1.61553	0.00925825	chr1	-	1208800	1208959	159	98	153	143	0	0	61	0	0	0	0	0	0	UBE2J2	chr1:1208800-1208959
36308	2.02042	0.00518208	chr1	-	1228482	1228761	279	600	1518	889	620	51	391	1	1	1	2	0	0	ACAP3	chr1:1228482-1228761
36308	1.41754	0.021085	chr1	-	1228782	1228841	59	112	29	83	102	0	3	0	0	0	0	0	0	ACAP3	chr1:1228782-1228841
36308	2.20803	0.00104431	chr1	-	1228882	1229041	159	161	220	333	68	0	0	1	2	1	0	0	0	ACAP3	chr1:1228882-1229041
36309	1.7575	0.0420385	chr1	-	1235394	1235493	99	100	295	0	0	100	0	0	2	0	0	0	0	ACAP3	chr1:1235394-1235493
36309	1.75054	0.00467161	chr1	-	1235654	1235913	259	390	700	554	325	181	93	0	1	0	0	0	2	ACAP3	chr1:1235654-1235913
36309	1.8766	0.0061424	chr1	-	1236034	1236133	99	273	77	232	170	0	0	0	0	0	0	0	0	ACAP3	chr1:1236034-1236133
36310	1.37324	0.0329422	chr1	-	1241475	1241534	59	119	65	18	18	60	18	0	1	1	1	0	1	ACAP3	chr1:1241475-1241534
36310	2.31895	0.00367817	chr1	-	1241695	1241994	299	787	437	340	84	59	23	1	0	1	0	0	0	ACAP3	chr1:1241695-1241994
36310	1.96	0.00564422	chr1	-	1242355	1242594	239	1238	684	482	286	210	384	3	0	0	0	0	0	ACAP3	chr1:1242355-1242594
36310	1.60772	0.011312	chr1	-	1242755	1243034	279	350	439	449	297	70	88	1	0	0	0	0	0	ACAP3	chr1:1242755-1243034
36311	2.32108	0.00484366	chr1	-	1246569	1246948	379	697	1026	672	60	215	108	0	0	0	0	0	0	CPSF3L MIR6727	chr1:1246569-1246948
36311	0.829832	0.0254888	chr1	-	1247229	1247348	119	327	118	368	803	103	162	1	0	2	0	0	0	CPSF3L MIR6727	chr1:1247229-1247348
36312	2.74636	0.0040738	chr1	-	1247997	1248156	159	541	134	154	0	1	0	3	0	0	0	0	0	CPSF3L MIR6727	chr1:1247997-1248156
36312	0.616611	0.0346165	chr1	-	1248197	1248296	99	414	454	298	1350	726	0	1	0	0	1	1	0	CPSF3L MIR6727	chr1:1248197-1248296
36312	1.44849	0.0053799	chr1	-	1248317	1248416	99	206	294	114	207	122	2	0	0	0	0	0	0	CPSF3L MIR6727	chr1:1248317-1248416
36312	1.34515	0.033453	chr1	-	1248617	1248716	99	53	221	299	349	0	0	0	0	0	0	0	0	CPSF3L MIR6727	chr1:1248617-1248716
36312	2.06158	0.000379301	chr1	-	1248757	1248876	119	351	579	230	284	99	0	2	2	1	1	0	0	CPSF3L MIR6727	chr1:1248757-1248876
36312	1.47865	0.0178491	chr1	-	1248917	1249056	139	121	315	275	39	235	79	0	2	1	0	0	0	CPSF3L MIR6727	chr1:1248917-1249056
36312	1.28704	0.0116993	chr1	-	1249157	1249516	359	2021	2452	1599	2216	1809	463	5	5	0	2	3	0	CPSF3L MIR6727	chr1:1249157-1249516
36312	1.64232	0.0206489	chr1	-	1249597	1249756	159	282	272	68	165	26	0	0	0	0	0	0	0	CPSF3L MIR6727	chr1:1249597-1249756
36312	1.61224	0.00835824	chr1	-	1249777	1249836	59	120	52	43	13	52	0	0	0	0	0	0	0	CPSF3L MIR6727	chr1:1249777-1249836
36312	1.7286	0.0046203	chr1	-	1249977	1250076	99	231	208	81	43	136	0	1	1	0	0	0	0	CPSF3L	chr1:1249977-1250076
12419	1.98267	0.0415155	chr1	+	1262934	1263013	79	72	99	390	84	8	72	0	0	0	0	0	0	CPTP	chr1:1262934-1263013
12419	1.19076	0.0266084	chr1	+	1263874	1263993	119	237	295	109	209	181	94	1	0	0	0	0	0	CPTP	chr1:1263874-1263993
12419	0.968815	0.0388989	chr1	+	1264074	1264133	59	89	97	100	191	5	105	0	0	0	0	0	0	CPTP	chr1:1264074-1264133
12419	1.84244	0.016802	chr1	+	1264634	1264713	79	189	80	56	0	67	0	1	1	0	0	1	0	CPTP	chr1:1264634-1264713
36316	1.11316	0.00732475	chr1	-	1322234	1322453	219	1179	1297	843	1328	977	651	9	3	4	0	2	2	CCNL2	chr1:1322234-1322453
36316	0.713456	0.032198	chr1	-	1322534	1322593	59	167	285	105	71	458	324	0	0	0	0	0	0	CCNL2	chr1:1322534-1322593
36317	1.77381	0.00751794	chr1	-	1326146	1326245	99	72	343	179	52	152	0	0	0	0	0	0	0	CCNL2	chr1:1326146-1326245
36318	1.28049	0.0386901	chr1	-	1333860	1333919	59	120	120	0	110	0	38	0	0	0	0	0	0	CCNL2	chr1:1333860-1333919
36318	1.5529	0.0157548	chr1	-	1334060	1334159	99	175	262	173	136	96	54	0	0	0	0	0	0	CCNL2	chr1:1334060-1334159
36318	1.90208	0.0103522	chr1	-	1334280	1334439	159	300	125	0	0	0	0	2	0	0	0	0	0	CCNL2	chr1:1334280-1334439
36318	1.56575	0.0180125	chr1	-	1334460	1334619	159	1078	363	389	778	125	100	1	0	2	0	0	0	CCNL2	chr1:1334460-1334619
36318	1.70767	0.00654273	chr1	-	1334720	1334919	199	215	179	186	87	0	0	0	0	0	1	0	0	CCNL2	chr1:1334720-1334919
12421	0.657001	0.0392482	chr1	+	1431143	1431202	59	405	220	120	820	290	120	0	0	1	1	0	0	ATAD3B	chr1:1431143-1431202
12421	1.28832	0.00790254	chr1	+	1431303	1431362	59	219	239	60	248	120	0	1	1	0	0	0	0	ATAD3B	chr1:1431303-1431362
12421	0.849807	0.0236565	chr1	+	1431483	1431542	59	240	118	120	481	118	0	1	0	0	0	0	0	ATAD3B	chr1:1431483-1431542
12421	1.6319	0.0084253	chr1	+	1431743	1431822	79	72	145	75	0	80	6	0	0	0	0	0	0	ATAD3B	chr1:1431743-1431822
36320	1.65	0.00132638	chr1	-	1476962	1477041	79	76	80	0	0	0	0	0	0	0	0	0	0	SSU72 TMEM240	chr1:1476962-1477041
36322	0.492405	0.0339017	chr1	-	1509878	1509957	79	588	621	881	1993	1466	1029	1	0	0	2	0	1	SSU72	chr1:1509878-1509957
36323	1.57642	0.00460991	chr1	-	1571995	1572154	159	486	477	346	363	15	287	2	2	0	0	0	0	CDK11B	chr1:1571995-1572154
36323	2.45257	0.000288146	chr1	-	1572275	1572354	79	210	302	489	108	108	50	0	0	0	0	0	0	CDK11B	chr1:1572275-1572354
36324	2.99811	0.0020651	chr1	-	1572453	1572652	199	956	694	898	197	261	0	2	4	0	0	0	0	CDK11B	chr1:1572453-1572652
36324	2.2317	0.00828444	chr1	-	1572733	1573012	279	910	1517	947	273	132	650	3	0	3	0	0	1	CDK11B	chr1:1572733-1573012
36324	0.870437	0.021084	chr1	-	1573113	1573212	99	328	253	331	350	414	333	0	0	1	0	0	0	CDK11B	chr1:1573113-1573212
36326	0.729759	0.0214957	chr1	-	1655586	1655705	119	697	694	261	1610	374	431	0	4	0	1	0	0	CDK11B CDK11A SLC35E2	chr1:1655586-1655705
36327	1.0274	0.0361174	chr1	-	1684380	1684459	79	152	77	127	233	72	39	1	0	0	0	0	0	NADK	chr1:1684380-1684459
12423	1.52291	0.0164029	chr1	+	2160383	2160482	99	100	56	109	71	0	0	0	0	0	0	0	0	SKI	chr1:2160383-2160482
12423	1.0129	0.0173564	chr1	+	2160743	2160882	139	349	492	140	709	59	203	0	3	0	1	0	0	SKI	chr1:2160743-2160882
12423	0.766777	0.0164311	chr1	+	2161023	2161242	219	1000	900	1118	2180	1159	805	0	5	1	4	0	2	SKI	chr1:2161023-2161242
36331	1.54795	0.0144469	chr1	-	2162410	2162469	59	50	43	66	34	5	0	0	0	0	0	0	0		chr1:2162410-2162469
12424	1.9887	0.00493573	chr1	+	2238205	2238324	119	271	238	167	120	21	30	3	2	0	0	0	0	SKI	chr1:2238205-2238324
12424	1.43496	0.0368524	chr1	+	2240285	2240344	59	105	60	0	6	60	0	0	2	0	0	0	0	SKI	chr1:2240285-2240344
12425	0.861298	0.0313307	chr1	+	2324458	2324497	39	102	111	40	120	121	66	1	1	1	2	2	1	RER1	chr1:2324458-2324497
36332	2.04444	0.0466507	chr1	-	2448536	2448595	59	0	0	188	0	0	0	0	0	0	0	0	0	PANK4	chr1:2448536-2448595
36332	1.25989	0.0211649	chr1	-	2449296	2449355	59	48	128	90	54	60	60	0	0	0	0	0	0	PANK4	chr1:2449296-2449355
36332	1.39362	0.0159205	chr1	-	2449436	2449575	139	263	223	142	214	0	118	0	0	0	0	0	0	PANK4	chr1:2449436-2449575
12430	1.03741	0.00873378	chr1	+	2478186	2478505	319	1911	2170	1127	2461	1183	1345	0	3	1	1	2	0		chr1:2478186-2478505
12430	1.38912	0.029203	chr1	+	2479646	2479705	59	169	768	195	382	207	187	1	3	0	0	0	0		chr1:2479646-2479705
12430	2.56144	0.0105298	chr1	+	2479906	2480025	119	164	648	25	81	16	15	0	3	0	0	0	0		chr1:2479906-2480025
36334	1.30469	0.0197938	chr1	-	3662625	3662684	59	162	104	55	119	21	60	0	0	0	0	0	1	TP73-AS1	chr1:3662625-3662684
36334	1.00969	0.0264992	chr1	-	3663225	3663404	179	289	478	248	377	410	217	2	0	0	1	0	0	TP73-AS1	chr1:3663225-3663404
36334	1.83654	0.00664893	chr1	-	3663525	3663644	119	120	120	164	56	0	0	0	0	0	0	0	0	TP73-AS1	chr1:3663525-3663644
12433	1.29422	0.0175066	chr1	+	6055247	6055426	179	322	680	601	393	270	455	0	1	1	0	0	1	KCNAB2	chr1:6055247-6055426
12433	1.92259	0.00822248	chr1	+	6055507	6055626	119	164	316	79	118	0	0	0	0	0	0	0	0	KCNAB2	chr1:6055507-6055626
12434	2.06948	0.00634116	chr1	+	6055667	6055766	99	84	286	160	0	54	49	0	1	0	0	0	0	KCNAB2	chr1:6055667-6055766
12434	0.975796	0.0225554	chr1	+	6056187	6056266	79	223	158	145	400	80	65	0	0	0	0	0	0	KCNAB2	chr1:6056187-6056266
12434	1.89984	0.010739	chr1	+	6056287	6056406	119	531	229	86	139	140	0	2	0	0	0	0	0	KCNAB2	chr1:6056287-6056406
12434	1.44708	0.0291742	chr1	+	6056567	6056666	99	128	192	50	46	78	39	0	0	0	0	0	0	KCNAB2	chr1:6056567-6056666
12434	1.39749	0.0280863	chr1	+	6056947	6057006	59	74	33	47	0	33	26	0	0	0	0	0	0	KCNAB2	chr1:6056947-6057006
12434	2.57197	0.000221445	chr1	+	6057227	6057386	159	133	358	375	0	0	48	0	1	2	0	0	0	KCNAB2	chr1:6057227-6057386
12436	1.70246	0.0151517	chr1	+	6076196	6076355	159	90	321	76	81	1	6	0	0	0	0	0	0	KCNAB2	chr1:6076196-6076355
12436	1.25	0.015709	chr1	+	6077016	6077095	79	195	120	95	54	226	0	0	0	0	0	0	0	KCNAB2	chr1:6077016-6077095
12438	1.23447	0.0205548	chr1	+	6159040	6159139	99	154	260	81	119	102	123	0	0	0	0	0	0	KCNAB2	chr1:6159040-6159139
12438	1.17827	0.0281754	chr1	+	6159740	6159799	59	59	60	120	60	119	0	0	0	1	0	0	0	KCNAB2	chr1:6159740-6159799
36344	1.81841	0.00595016	chr1	-	6340885	6340984	99	34	276	93	54	37	0	0	2	0	0	0	0	ACOT7	chr1:6340885-6340984
36345	1.78936	0.00510032	chr1	-	6397116	6397235	119	111	116	220	91	0	0	0	0	0	0	0	0	ACOT7	chr1:6397116-6397235
36345	1.15598	0.0323612	chr1	-	6397276	6397355	79	72	145	80	228	0	0	1	0	0	0	0	0	ACOT7	chr1:6397276-6397355
36346	1.53161	0.0221145	chr1	-	6399080	6399159	79	16	130	143	16	18	74	0	0	1	0	0	0	ACOT7	chr1:6399080-6399159
12440	1.6	0.0181735	chr1	+	6640264	6640363	99	106	197	37	0	0	100	0	0	0	0	0	0	TAS1R1 ZBTB48	chr1:6640264-6640363
12440	0.80274	0.0361381	chr1	+	6640784	6640843	59	162	144	100	215	320	11	0	0	0	0	1	0	TAS1R1 ZBTB48	chr1:6640784-6640843
12440	1.01626	0.0279836	chr1	+	6641084	6641183	99	206	135	234	245	41	275	0	0	0	0	0	0	TAS1R1 ZBTB48	chr1:6641084-6641183
12440	0.990411	0.0251668	chr1	+	6641264	6641343	79	130	130	219	250	240	0	0	0	1	0	0	0	TAS1R1 ZBTB48	chr1:6641264-6641343
36349	1.1477	0.0249987	chr1	-	6653243	6653302	59	80	90	120	113	120	0	1	0	0	0	0	0	KLHL21	chr1:6653243-6653302
12441	1.10209	0.0249946	chr1	+	6692961	6693020	59	103	136	56	104	70	73	0	0	0	1	0	0	THAP3	chr1:6692961-6693020
12441	1.13717	0.0188616	chr1	+	6693101	6693160	59	95	119	120	89	175	8	0	0	0	0	0	0	THAP3	chr1:6693101-6693160
12441	2.18212	0.00753769	chr1	+	6693201	6693340	139	505	501	511	312	126	33	0	0	4	0	1	0	THAP3	chr1:6693201-6693340
12441	1.3386	0.0319602	chr1	+	6693381	6693460	79	66	153	300	135	137	58	0	0	1	0	0	0	THAP3	chr1:6693381-6693460
36354	1.61905	0.0168699	chr1	-	8418205	8418304	99	101	33	76	0	15	0	0	0	0	0	0	0	RERE	chr1:8418205-8418304
36354	2.22925	0.0031669	chr1	-	8418405	8418904	499	2126	1943	953	973	261	198	4	3	1	1	1	0	RERE	chr1:8418405-8418904
36363	1.4	0.0387841	chr1	-	8930298	8930377	79	78	144	0	0	83	7	0	0	0	0	0	0	ENO1	chr1:8930298-8930377
12456	1.59333	0.00765158	chr1	+	9416641	9416740	99	100	3	75	0	0	0	0	0	0	0	0	0	SPSB1	chr1:9416641-9416740
12462	0.569252	0.0231979	chr1	+	10356973	10357072	99	461	912	781	1276	1213	1531	1	1	1	1	1	1	KIF1B	chr1:10356973-10357072
12473	0.456004	0.0272287	chr1	+	11083470	11083549	79	1273	1495	1035	2973	3369	2312	2	2	1	2	0	2	TARDBP	chr1:11083470-11083549
12473	0.790423	0.0273684	chr1	+	11083650	11083729	79	351	455	93	190	583	428	0	0	0	0	0	0	TARDBP	chr1:11083650-11083729
36377	0.99322	0.00766361	chr1	-	11114805	11114944	139	721	820	668	1125	659	451	1	1	0	0	0	0	SRM	chr1:11114805-11114944
12475	1.1331	0.0359959	chr1	+	11333315	11333374	59	109	305	49	214	121	56	1	0	0	0	0	0	UBIAD1	chr1:11333315-11333374
12475	0.737781	0.0219444	chr1	+	11333675	11333754	79	228	375	250	610	483	177	3	0	3	0	1	0	UBIAD1	chr1:11333675-11333754
12475	0.975806	0.0194983	chr1	+	11333835	11333974	139	349	385	290	571	330	159	2	0	0	2	0	0	UBIAD1	chr1:11333835-11333974
12475	0.840456	0.0226971	chr1	+	11333995	11334054	59	319	293	81	320	333	212	2	1	0	1	1	0	UBIAD1	chr1:11333995-11334054
12479	1.0443	0.0226726	chr1	+	11670437	11670536	99	228	219	243	230	186	232	0	0	0	0	0	0	LOC101929181	chr1:11670437-11670536
36383	0.919275	0.00690994	chr1	-	11865262	11865361	99	317	738	315	541	436	540	0	0	1	0	0	1	MTHFR	chr1:11865262-11865361
12482	1.31776	0.00944743	chr1	+	12034685	12034744	59	85	93	65	0	38	103	0	0	0	0	0	0	PLOD1	chr1:12034685-12034744
12487	0.639693	0.0278404	chr1	+	15736488	15736527	39	329	111	191	401	333	316	0	0	0	0	1	0	EFHD2	chr1:15736488-15736527
12487	1.45004	0.0105215	chr1	+	15736548	15736747	199	772	645	1504	826	507	505	1	3	1	0	0	1	EFHD2	chr1:15736548-15736747
12488	0.605777	0.0222763	chr1	+	15755101	15755140	39	269	236	147	465	538	154	0	1	0	0	1	0	EFHD2	chr1:15755101-15755140
12493	0.546156	0.0153378	chr1	+	16154727	16154846	119	2172	2187	1718	4287	3707	3415	12	11	14	31	21	20		chr1:16154727-16154846
12494	0.679365	0.00629451	chr1	+	16199530	16199629	99	1813	2078	836	2906	1815	2380	3	2	0	3	1	3	SPEN	chr1:16199530-16199629
12495	0.587327	0.0278533	chr1	+	16202914	16202953	39	200	275	120	561	254	296	1	1	0	0	0	0	SPEN	chr1:16202914-16202953
12496	1.08299	0.0154417	chr1	+	16260224	16260303	79	102	213	241	274	51	166	0	0	0	0	0	1	SPEN	chr1:16260224-16260303
12496	1.18712	0.0126779	chr1	+	16261084	16261243	159	405	583	279	177	727	91	1	0	0	0	0	0	SPEN	chr1:16261084-16261243
12496	1.84324	0.00266275	chr1	+	16261524	16261763	239	457	530	676	89	410	72	0	0	1	0	1	0	SPEN	chr1:16261524-16261763
12497	0.856129	0.0267784	chr1	+	16266067	16266186	119	204	424	331	439	358	389	1	1	0	0	1	0	SPEN	chr1:16266067-16266186
12497	0.783398	0.0357233	chr1	+	16266347	16266406	59	147	179	90	181	250	160	0	2	0	0	0	0	SPEN	chr1:16266347-16266406
12500	0.956781	0.0339192	chr1	+	16785336	16785415	79	111	138	149	62	278	91	0	1	0	0	0	0	NECAP2	chr1:16785336-16785415
36399	1.85398	0.0194683	chr1	-	16800538	16800677	139	58	99	261	0	0	32	0	0	0	0	0	0	CROCCP3	chr1:16800538-16800677
36399	1.97421	0.00768541	chr1	-	16800818	16800917	99	0	256	129	43	0	6	0	1	0	0	0	0	CROCCP3	chr1:16800818-16800917
36408	0.666667	0.0234787	chr1	-	16935130	16935229	99	625	511	270	1370	689	200	0	0	0	0	0	0	NBPF1	chr1:16935130-16935229
36409	1.40273	0.0329563	chr1	-	16970879	16971018	139	375	397	37	367	24	68	1	0	0	0	0	0		chr1:16970879-16971018
36417	0.916667	0.0357322	chr1	-	19401283	19401322	39	100	40	136	185	60	67	0	0	0	0	0	0	UBR4	chr1:19401283-19401322
36420	1.56667	0.0122029	chr1	-	19468277	19468336	59	0	60	42	0	0	0	0	0	0	0	0	0	UBR4	chr1:19468277-19468336
12508	1.44884	0.0297634	chr1	+	19586614	19586673	59	120	135	0	120	0	3	0	1	0	0	0	0	MRTO4	chr1:19586614-19586673
36458	0.846315	0.00857004	chr1	-	22109396	22109475	79	515	449	415	1083	228	362	0	0	0	0	0	0	USP48	chr1:22109396-22109475
36459	1.0144	0.00920122	chr1	-	23415453	23415532	79	644	465	201	617	443	228	0	0	0	0	0	0	LUZP1	chr1:23415453-23415532
36467	0.74717	0.0330418	chr1	-	23884699	23884818	119	401	275	540	949	275	536	0	1	1	0	0	0	ID3	chr1:23884699-23884818
36467	1.50936	0.0294557	chr1	-	23884919	23885018	99	167	235	8	87	0	94	4	0	0	0	0	0	ID3	chr1:23884919-23885018
36467	0.582687	0.0335594	chr1	-	23885539	23885598	59	199	417	180	811	368	316	0	0	0	0	0	0	ID3	chr1:23885539-23885598
12528	1.10959	0.0117218	chr1	+	24069693	24069772	79	130	276	160	330	160	0	0	1	0	0	0	0	TCEB3	chr1:24069693-24069772
12528	0.839465	0.0361183	chr1	+	24069853	24069932	79	133	226	150	441	73	135	0	0	1	1	0	1	TCEB3	chr1:24069853-24069932
12528	1.51532	0.0126427	chr1	+	24070333	24070432	99	105	97	42	0	55	0	0	0	0	0	1	0	TCEB3	chr1:24070333-24070432
12528	2.18453	0.0116117	chr1	+	24070473	24070632	159	145	218	396	89	0	0	0	0	1	0	0	0	TCEB3	chr1:24070473-24070632
12536	1.50515	0.0217656	chr1	+	24105117	24105216	99	0	163	121	11	77	0	0	0	0	0	0	0	PITHD1	chr1:24105117-24105216
12545	0.646947	0.0270795	chr1	+	24995852	24995871	19	82	145	28	40	270	154	2	2	2	0	0	0	SRRM1	chr1:24995852-24995871
36479	0.485488	0.0420566	chr1	-	25572992	25573031	39	251	251	290	684	719	372	0	1	1	0	0	0	RSRP1	chr1:25572992-25573031
12563	1.49362	0.0118286	chr1	+	26798089	26798208	119	175	164	117	0	189	0	1	0	0	0	0	0	DHDDS HMGN2	chr1:26798089-26798208
12567	0.902086	0.0209857	chr1	+	26900679	26900798	119	345	499	345	915	373	70	2	0	0	1	1	0	RPS6KA1	chr1:26900679-26900798
12567	0.767871	0.0291712	chr1	+	26900819	26900898	79	184	404	171	688	152	221	0	0	0	0	0	0	RPS6KA1	chr1:26900819-26900898
36489	1.26915	0.0210671	chr1	-	27216381	27216480	99	395	310	180	319	205	116	2	0	0	0	0	0	GPN2 GPATCH3	chr1:27216381-27216480
12571	0.433941	0.0355605	chr1	+	27267966	27268045	79	1085	1143	622	3570	1494	1822	1	0	0	0	0	1	NUDC	chr1:27267966-27268045
12575	1.26628	0.0063615	chr1	+	27320894	27321633	739	3561	3095	3448	3368	1968	2192	4	3	3	2	2	0	TRNP1	chr1:27320894-27321633
12575	0.858586	0.0169801	chr1	+	27321674	27321753	79	304	225	336	168	534	345	0	0	0	0	0	0	TRNP1	chr1:27321674-27321753
12575	0.671358	0.0325495	chr1	+	27321794	27321913	119	412	433	413	897	514	645	0	0	1	0	0	0	TRNP1	chr1:27321794-27321913
36491	0.975036	0.0180259	chr1	-	27426949	27427068	119	379	248	380	607	244	187	0	0	0	0	0	1	SLC9A1	chr1:27426949-27427068
36491	2.00985	0.0115188	chr1	-	27427209	27427388	179	260	570	258	164	92	16	0	1	0	0	0	0	SLC9A1	chr1:27427209-27427388
36491	1.75666	0.00274694	chr1	-	27427509	27427608	99	257	172	256	106	157	0	1	0	0	0	0	0	SLC9A1	chr1:27427509-27427608
36492	1.93802	0.000968378	chr1	-	27427880	27427959	79	0	151	78	0	2	0	0	0	0	0	0	0	SLC9A1	chr1:27427880-27427959
36492	2.14512	0.0133918	chr1	-	27428200	27428439	239	430	158	576	75	0	87	1	1	0	0	0	0	SLC9A1	chr1:27428200-27428439
36492	1.92157	0.00576684	chr1	-	27428480	27428599	119	94	275	153	99	0	0	0	0	0	0	0	0	SLC9A1	chr1:27428480-27428599
36492	1.5125	0.0113901	chr1	-	27429000	27429079	79	0	69	54	0	0	0	0	0	0	0	0	0	SLC9A1	chr1:27429000-27429079
36492	1.16857	0.0307377	chr1	-	27429540	27429599	59	109	60	60	120	50	0	0	0	0	0	0	0	SLC9A1	chr1:27429540-27429599
36492	1.63554	0.00451835	chr1	-	27429880	27429959	79	45	185	73	41	0	51	0	0	0	0	0	0	SLC9A1	chr1:27429880-27429959
36493	2.03772	0.00626857	chr1	-	27480561	27480740	179	961	1415	866	662	452	198	0	0	0	1	0	0	SLC9A1	chr1:27480561-27480740
36493	0.926304	0.0197301	chr1	-	27480761	27480960	199	842	435	550	874	790	382	1	4	1	0	0	0	SLC9A1	chr1:27480761-27480960
36493	1.92978	0.00333802	chr1	-	27481101	27481220	119	361	376	269	139	196	17	1	0	1	0	0	0	SLC9A1	chr1:27481101-27481220
36493	1.66268	0.0100273	chr1	-	27481241	27481420	179	1024	808	669	348	324	621	1	2	2	0	1	1	SLC9A1	chr1:27481241-27481420
36497	1.95045	0.0228635	chr1	-	27873780	27873839	59	99	150	0	0	42	0	1	0	0	0	0	0	AHDC1	chr1:27873780-27873839
36497	1.85849	0.0101227	chr1	-	27873980	27874079	99	98	0	193	13	0	5	0	0	0	0	0	0	AHDC1	chr1:27873980-27874079
36497	1.43312	0.0322367	chr1	-	27874340	27874419	79	72	74	64	74	0	0	0	0	0	0	0	0	AHDC1	chr1:27874340-27874419
36497	2.01929	0.00397056	chr1	-	27874580	27874679	99	158	88	78	0	11	0	0	1	0	0	0	0	AHDC1	chr1:27874580-27874679
36497	1.89034	0.00184556	chr1	-	27874820	27874999	179	135	215	265	71	0	0	0	0	0	0	0	0	AHDC1	chr1:27874820-27874999
36497	1.68239	0.0307668	chr1	-	27875020	27875099	79	185	0	110	70	0	8	0	0	0	0	0	0	AHDC1	chr1:27875020-27875099
36497	2.0894	0.0109207	chr1	-	27875400	27875499	99	87	0	244	0	0	2	0	0	0	0	0	0	AHDC1	chr1:27875400-27875499
36497	1.51761	0.0211976	chr1	-	27875660	27875739	79	115	0	76	44	0	0	0	0	0	0	0	0	AHDC1	chr1:27875660-27875739
12585	0.934892	0.00725227	chr1	+	28562861	28562960	99	886	528	869	862	1183	419	2	0	2	3	1	0	ATPIF1	chr1:28562861-28562960
36511	1.85476	0.00220266	chr1	-	28856973	28857112	139	176	183	0	0	0	0	0	0	0	0	0	0		chr1:28856973-28857112
36512	0.925234	0.0245342	chr1	-	28858258	28858317	59	104	166	140	233	38	191	0	1	0	0	0	0		chr1:28858258-28858317
36512	1.02125	0.0356845	chr1	-	28858538	28858657	119	305	130	118	26	248	260	0	0	0	0	0	0		chr1:28858538-28858657
36512	1.62518	0.00229211	chr1	-	28859138	28859277	139	749	358	677	595	339	0	2	1	1	3	0	0		chr1:28859138-28859277
36513	1.88503	0.00835126	chr1	-	28862347	28862446	99	266	245	50	161	0	0	1	0	1	0	0	0		chr1:28862347-28862446
36513	1.22026	0.0219525	chr1	-	28862907	28863046	139	160	324	204	119	280	85	0	0	0	1	0	0		chr1:28862907-28863046
36514	1.01248	0.0309728	chr1	-	28863821	28863900	79	194	197	99	96	264	117	0	0	0	0	1	0		chr1:28863821-28863900
36519	0.718027	0.00618599	chr1	-	28908090	28908369	279	8526	8559	6805	18295	9244	6215	23	22	24	33	17	8	SNORA61 SNORA44 SNORA16A SNHG12	chr1:28908090-28908369
36526	1.45338	0.0167245	chr1	-	31188881	31188980	99	230	149	112	90	53	100	1	0	0	0	0	1	MATN1	chr1:31188881-31188980
36537	0.561648	0.0234822	chr1	-	32403827	32403906	79	407	876	327	1881	470	702	0	1	0	0	0	2	PTP4A2	chr1:32403827-32403906
12612	0.549539	0.0293658	chr1	+	32479540	32479559	19	193	156	60	549	99	160	1	0	1	0	0	0	KHDRBS1	chr1:32479540-32479559
12612	0.750439	0.026022	chr1	+	32479620	32479739	119	368	429	543	1244	256	396	0	0	2	4	0	1	KHDRBS1	chr1:32479620-32479739
12612	0.702681	0.0256014	chr1	+	32479820	32479879	59	317	180	180	329	345	373	2	0	0	0	0	1	KHDRBS1	chr1:32479820-32479879
36538	1.07014	0.0198519	chr1	-	32538244	32538363	119	191	391	171	209	383	103	1	3	0	0	0	0		chr1:32538244-32538363
36538	1.84419	0.00330558	chr1	-	32538404	32538503	99	128	165	58	26	13	14	0	0	0	0	0	0		chr1:32538404-32538503
36538	1.74571	0.0108018	chr1	-	32538624	32539063	439	1522	995	706	375	622	294	7	0	2	1	2	0		chr1:32538624-32539063
12627	0.783724	0.0276811	chr1	+	32792699	32792758	59	188	217	114	250	271	180	1	0	0	3	0	1	HDAC1	chr1:32792699-32792758
12627	1.07855	0.0204871	chr1	+	32792859	32792938	79	435	118	274	526	146	81	0	1	0	0	0	0	HDAC1	chr1:32792859-32792938
36539	1.1131	0.0240152	chr1	-	32797498	32797537	39	40	80	134	40	132	40	0	0	0	0	1	0	MARCKSL1	chr1:32797498-32797537
36540	0.42616	0.0434679	chr1	-	32800342	32800361	19	273	187	187	980	378	241	0	0	0	0	0	0	MARCKSL1	chr1:32800342-32800361
36540	0.735877	0.00907181	chr1	-	32800662	32800781	119	1187	859	1116	1301	1271	1853	0	1	1	1	1	1	MARCKSL1	chr1:32800662-32800781
36544	0.723553	0.0263509	chr1	-	32842203	32842302	99	405	527	206	714	363	627	1	1	1	0	0	0	BSDC1	chr1:32842203-32842302
12640	1.32563	0.0386819	chr1	+	33546822	33546881	59	241	267	0	176	118	45	0	0	0	0	0	0	AZIN2	chr1:33546822-33546881
12640	1.52735	0.00574916	chr1	+	33547062	33547541	479	2787	2094	1561	1363	1330	1055	7	2	3	1	0	0	AZIN2	chr1:33547062-33547541
12640	1.25359	0.0102189	chr1	+	33547882	33547961	79	185	201	160	177	104	102	0	0	0	0	1	0	AZIN2	chr1:33547882-33547961
36575	0.658436	0.0147352	chr1	-	35642934	35642993	59	570	360	486	739	796	715	0	0	1	0	0	0		chr1:35642934-35642993
36577	0.534818	0.0274905	chr1	-	35656112	35656191	79	760	657	781	1310	1419	1604	3	0	0	0	1	1	SFPQ	chr1:35656112-35656191
36577	1.1875	0.00362335	chr1	-	35657452	35657691	239	1437	2404	1389	2535	1032	721	1	1	2	4	0	0	SFPQ	chr1:35657452-35657691
36578	0.743594	0.0043203	chr1	-	35657805	35657984	179	5149	5696	4849	14103	3939	3304	9	7	3	7	2	3	SFPQ	chr1:35657805-35657984
36578	0.721812	0.00797938	chr1	-	35658005	35658644	639	12718	11846	8098	28015	10377	7548	28	20	13	57	21	19	SFPQ	chr1:35658005-35658644
12653	1.9676	0.0164242	chr1	+	36558018	36558137	119	273	0	278	0	103	0	0	0	0	0	0	0	ADPRHL2	chr1:36558018-36558137
12653	2.33333	0.00353015	chr1	+	36558178	36558237	59	180	60	0	0	0	0	0	0	0	0	0	0	ADPRHL2	chr1:36558178-36558237
12653	0.910569	0.0171169	chr1	+	36558878	36558997	119	380	359	353	436	568	235	1	0	0	0	0	0	ADPRHL2	chr1:36558878-36558997
12653	0.73999	0.0244629	chr1	+	36559118	36559217	99	234	348	533	591	479	553	0	0	2	0	0	0	ADPRHL2	chr1:36559118-36559217
12654	0.432412	0.0467393	chr1	+	36752588	36752607	19	147	225	143	520	361	398	1	0	0	0	0	0	THRAP3	chr1:36752588-36752607
12654	0.451685	0.0385622	chr1	+	36752628	36752667	39	357	466	269	1068	659	834	0	1	1	1	1	3	THRAP3	chr1:36752628-36752667
12655	0.686106	0.0149175	chr1	+	36755281	36755320	39	298	218	156	456	350	236	1	1	0	0	1	0	THRAP3	chr1:36755281-36755320
12661	0.830857	0.0394341	chr1	+	37940464	37940543	79	161	144	178	343	154	138	0	1	0	0	0	0	ZC3H12A	chr1:37940464-37940543
12661	0.79476	0.04029	chr1	+	37941884	37941943	59	113	190	63	221	286	0	0	0	0	0	0	0	ZC3H12A	chr1:37941884-37941943
36601	0.469333	0.0491001	chr1	-	38048399	38048458	59	353	456	243	1103	584	758	0	0	0	0	0	0	GNL2	chr1:38048399-38048458
12698	0.621481	0.0369017	chr1	+	39945528	39945587	59	225	290	140	398	492	276	0	1	0	1	0	0	MACF1	chr1:39945528-39945587
12698	0.523952	0.0417064	chr1	+	39945608	39945627	19	87	139	60	226	200	166	0	0	1	1	1	2	MACF1	chr1:39945608-39945627
36624	1.23819	0.0146442	chr1	-	40041366	40041445	79	141	176	94	173	96	20	1	0	0	0	0	0	PABPC4	chr1:40041366-40041445
36624	0.726562	0.038899	chr1	-	40042226	40042285	59	111	176	180	351	181	180	0	0	1	0	1	0	PABPC4	chr1:40042226-40042285
36632	1.54366	0.00356597	chr1	-	40366313	40366412	99	209	338	245	120	283	7	0	0	1	0	0	0	MYCL	chr1:40366313-40366412
36632	2.13961	0.00438976	chr1	-	40366633	40367032	399	1479	1121	889	775	13	211	2	0	2	0	0	0	MYCL	chr1:40366633-40367032
36632	1.55637	0.00484474	chr1	-	40367053	40367232	179	502	872	817	467	419	335	2	2	0	0	1	0	MYCL	chr1:40367053-40367232
12709	2.09811	0.00271234	chr1	+	40536279	40536358	79	39	115	154	2	23	0	0	0	2	0	0	0	CAP1	chr1:40536279-40536358
12715	0.48845	0.039144	chr1	+	40839735	40839814	79	670	579	250	2088	552	661	2	2	0	5	4	4	SMAP2	chr1:40839735-40839814
12722	0.500674	0.0299663	chr1	+	43148286	43148385	99	755	1010	836	3617	852	981	7	8	3	27	12	8	YBX1	chr1:43148286-43148385
12729	1.57937	0.00883087	chr1	+	43824680	43824759	79	80	0	78	12	0	0	0	0	0	0	0	0	CDC20	chr1:43824680-43824759
12729	1.23596	0.0289212	chr1	+	43825040	43825179	139	167	311	88	114	69	198	0	0	1	0	0	0	CDC20	chr1:43825040-43825179
12729	1.01344	0.0203265	chr1	+	43825460	43825499	39	118	75	64	140	80	32	0	0	0	0	0	0	CDC20	chr1:43825460-43825499
12729	1.21519	0.0180836	chr1	+	43825600	43825659	59	104	60	120	84	67	60	3	0	1	1	0	0	CDC20	chr1:43825600-43825659
12747	1.12722	0.0260826	chr1	+	45266247	45266546	299	543	567	583	660	245	502	1	1	1	1	0	0	PLK3	chr1:45266247-45266546
12748	1.52156	0.0199576	chr1	+	45275410	45275529	119	175	206	0	0	33	94	0	0	0	0	0	0	BTBD19	chr1:45275410-45275529
12752	1.67403	0.00561284	chr1	+	45793100	45793199	99	100	124	82	62	0	0	0	0	0	0	0	0	HPDL	chr1:45793100-45793199
12757	0.680921	0.0303865	chr1	+	46050005	46050084	79	234	336	189	756	441	23	1	4	4	10	5	0	NASP	chr1:46050005-46050084
12762	0.404503	0.0374034	chr1	+	46080738	46080777	39	1083	819	579	3147	1350	1811	0	1	0	2	1	0	NASP	chr1:46080738-46080777
12763	1.61702	0.0053809	chr1	+	46087174	46087233	59	0	64	60	0	0	8	0	0	0	0	0	0		chr1:46087174-46087233
12764	1.09959	0.0202553	chr1	+	46087614	46087673	59	186	115	60	79	211	22	0	0	0	0	0	0		chr1:46087614-46087673
12764	0.899103	0.0238874	chr1	+	46087754	46087793	39	116	125	40	110	116	100	0	0	0	0	0	0		chr1:46087754-46087793
12764	1.95577	0.00893539	chr1	+	46087914	46088353	439	815	776	1137	508	174	78	2	2	1	0	0	0		chr1:46087914-46088353
12764	2.14073	0.00345849	chr1	+	46088434	46088533	99	370	669	239	15	235	185	0	0	1	0	1	0		chr1:46088434-46088533
12764	1.86038	0.0132595	chr1	+	46088654	46088793	139	400	557	90	120	0	255	0	2	1	0	0	0		chr1:46088654-46088793
12764	1.70027	0.014202	chr1	+	46088894	46089133	239	408	435	343	263	108	30	0	0	0	0	0	0		chr1:46088894-46089133
12772	1.84242	0.00400084	chr1	+	46152292	46152391	99	179	89	40	23	7	0	0	0	0	0	0	0	TMEM69	chr1:46152292-46152391
12772	1.95803	0.0028643	chr1	+	46152592	46152751	159	343	302	216	0	0	211	2	0	1	0	0	0	TMEM69	chr1:46152592-46152751
12772	1.50488	0.0103075	chr1	+	46152792	46152891	99	176	94	43	31	40	39	1	0	0	0	0	0	TMEM69	chr1:46152792-46152891
12780	1.53631	0.0270203	chr1	+	46500259	46500358	99	127	53	66	58	0	0	0	0	1	0	0	0	MAST2	chr1:46500259-46500358
12780	1.96104	0.000418556	chr1	+	46500559	46500658	99	94	112	94	8	0	0	0	0	1	0	0	0	MAST2	chr1:46500559-46500658
12780	0.87378	0.0216757	chr1	+	46500699	46500818	119	440	283	248	297	626	246	2	1	0	2	0	0	MAST2	chr1:46500699-46500818
12780	1.03933	0.0241235	chr1	+	46500879	46500978	99	88	261	215	208	83	248	0	2	0	0	0	0	MAST2	chr1:46500879-46500978
12780	1.1165	0.0217949	chr1	+	46501359	46501458	99	122	202	181	147	244	30	0	0	0	0	0	0	MAST2	chr1:46501359-46501458
36688	1.25043	0.0125962	chr1	-	47183490	47183589	99	132	160	123	32	52	191	1	0	0	0	0	0	EFCAB14	chr1:47183490-47183589
36702	0.412551	0.0410268	chr1	-	51425743	51425802	59	578	1046	631	2757	2006	949	1	0	0	1	4	0	FAF1	chr1:51425743-51425802
36717	0.71224	0.00930353	chr1	-	52344005	52344144	139	1986	3456	1376	4421	2902	2445	4	2	0	1	1	0	NRD1	chr1:52344005-52344144
36717	0.498429	0.0321707	chr1	-	52344185	52344204	19	146	199	71	448	297	142	0	0	0	1	1	0	NRD1	chr1:52344185-52344204
36722	0.797826	0.0260305	chr1	-	52498799	52498898	99	514	262	380	449	309	778	1	0	2	0	0	1	TXNDC12 KTI12	chr1:52498799-52498898
36722	0.78356	0.0219839	chr1	-	52498919	52499018	99	574	491	246	646	722	380	0	0	0	0	2	0	TXNDC12 KTI12	chr1:52498919-52499018
36722	1.39886	0.00341049	chr1	-	52499199	52499298	99	412	404	100	227	213	135	0	2	0	0	0	0	TXNDC12 KTI12	chr1:52499199-52499298
36722	1.20539	0.020193	chr1	-	52499419	52499498	79	85	170	221	129	157	64	0	0	0	0	1	0	TXNDC12 KTI12	chr1:52499419-52499498
12812	0.631875	0.0172632	chr1	+	52878215	52878274	59	363	734	297	707	597	987	0	0	0	1	2	2	PRPF38A	chr1:52878215-52878274
36757	0.553828	0.0197247	chr1	-	59247478	59247557	79	762	907	478	1878	1486	702	0	0	0	0	1	0	JUN	chr1:59247478-59247557
36757	1.16385	0.0136244	chr1	-	59248038	59248317	279	767	933	529	1020	498	291	2	3	2	2	1	0	JUN	chr1:59248038-59248317
36757	0.778189	0.0331466	chr1	-	59248898	59248937	39	130	127	40	134	163	120	1	0	0	0	1	0	JUN	chr1:59248898-59248937
36757	0.537527	0.0330397	chr1	-	59249378	59249437	59	346	396	313	851	762	508	0	1	0	0	1	0	JUN	chr1:59249378-59249437
12846	1.37563	0.0177491	chr1	+	65720596	65720675	79	147	80	75	72	10	72	0	0	0	0	0	0		chr1:65720596-65720675
36771	0.994888	0.0174162	chr1	-	67519033	67519172	139	261	500	356	652	353	132	3	2	0	2	0	0	SLC35D1	chr1:67519033-67519172
36771	1.5625	0.0249223	chr1	-	67519193	67519252	59	104	91	0	0	0	60	0	0	0	0	0	0	SLC35D1	chr1:67519193-67519252
36786	0.733536	0.0318589	chr1	-	67863059	67863118	59	60	240	240	317	155	335	0	0	1	0	0	0		chr1:67863059-67863118
36794	1.87778	0.000190337	chr1	-	67895134	67895193	59	60	50	48	0	0	0	0	0	0	0	0	0	SERBP1	chr1:67895134-67895193
36794	1.98943	0.00485044	chr1	-	67895214	67895373	159	229	301	303	127	0	55	0	0	1	0	0	0	SERBP1	chr1:67895214-67895373
12852	0.796961	0.0365462	chr1	+	68151289	68151348	59	180	170	47	189	270	85	0	0	0	0	0	0	GADD45A	chr1:68151289-68151348
12854	0.828577	0.00958588	chr1	+	70687091	70687730	639	5323	4897	4049	8965	5022	3676	7	13	5	8	4	7	SRSF11	chr1:70687091-70687730
12854	0.912014	0.00744738	chr1	+	70697951	70698050	99	647	924	706	901	880	733	0	1	0	4	0	0	SRSF11	chr1:70697951-70698050
12858	1.71111	0.020297	chr1	+	70820398	70820457	59	0	46	82	0	0	0	0	0	0	0	0	0	HHLA3	chr1:70820398-70820457
12868	0.72093	0.0340333	chr1	+	76198540	76198579	39	80	148	117	191	147	187	0	0	0	0	0	0	ACADM	chr1:76198540-76198579
36868	1.57222	0.00535839	chr1	-	85724823	85724942	119	17	99	86	0	0	0	0	1	0	0	0	0	C1orf52	chr1:85724823-85724942
12931	1.4	0.0141453	chr1	+	92789940	92789999	59	120	60	60	60	0	60	0	0	0	0	0	0	RPAP2	chr1:92789940-92789999
12947	0.551387	0.03897	chr1	+	93811874	93811913	39	188	223	141	643	276	183	0	1	0	1	0	0	DR1	chr1:93811874-93811913
12953	0.728079	0.0279851	chr1	+	94884521	94884680	159	681	457	674	1575	519	577	1	1	0	2	0	0	ABCD3	chr1:94884521-94884680
12977	0.830038	0.015905	chr1	+	104068756	104068875	119	382	633	388	1004	510	250	0	0	0	0	0	0	RNPC3	chr1:104068756-104068875
13015	1.75773	0.00785699	chr1	+	110171112	110171171	59	0	108	53	14	0	0	0	0	0	0	0	0	AMPD2	chr1:110171112-110171171
13018	2.17222	0.00966745	chr1	+	110198490	110198609	119	77	326	19	0	0	0	0	0	0	0	0	0	GSTM4	chr1:110198490-110198609
13018	1.84016	0.0141126	chr1	+	110198650	110198729	79	0	63	146	0	0	4	0	0	0	0	0	0	GSTM4	chr1:110198650-110198729
36955	1.18785	0.0120989	chr1	-	110282294	110282433	139	717	318	657	517	374	467	0	0	0	0	0	0	GSTM3	chr1:110282294-110282433
36955	1.51238	0.0390763	chr1	-	110282474	110282553	79	3	160	208	160	0	0	0	0	0	1	0	0	GSTM3	chr1:110282474-110282553
36955	0.80914	0.0263643	chr1	-	110282714	110282833	119	513	197	431	753	500	247	0	0	1	0	0	0	GSTM3	chr1:110282714-110282833
36972	0.410193	0.0496445	chr1	-	113497984	113498003	19	200	260	140	597	483	465	0	0	0	0	0	1	SLC16A1	chr1:113497984-113498003
36972	0.720421	0.0197105	chr1	-	113498204	113498263	59	189	393	119	196	437	421	0	2	0	0	0	0	SLC16A1	chr1:113498204-113498263
36972	0.870901	0.00976481	chr1	-	113498284	113498423	139	1361	1065	892	1765	1408	752	5	10	0	2	1	1	SLC16A1	chr1:113498284-113498423
36972	0.622287	0.0220582	chr1	-	113498464	113498483	19	196	96	78	248	220	163	0	0	0	0	0	0	SLC16A1	chr1:113498464-113498483
36972	0.442484	0.0497311	chr1	-	113498504	113498523	19	280	207	80	669	440	240	0	0	0	1	1	0	SLC16A1	chr1:113498504-113498523
13053	1.2342	0.0145099	chr1	+	116942401	116942540	139	491	344	256	347	70	393	2	1	0	1	0	0	ATP1A1	chr1:116942401-116942540
13053	1.05938	0.0156355	chr1	+	116942581	116942660	79	193	226	122	350	71	80	1	0	0	0	0	0	ATP1A1	chr1:116942581-116942660
13065	1.15974	0.0101384	chr1	+	118148804	118149083	279	2824	1856	1050	2925	1113	789	6	1	4	3	4	2	FAM46C	chr1:118148804-118149083
13065	0.513557	0.0499008	chr1	+	118149284	118149303	19	71	112	79	382	125	60	0	0	0	0	0	0	FAM46C	chr1:118149284-118149303
13065	0.850559	0.022462	chr1	+	118149384	118149503	119	491	372	604	597	821	366	0	0	0	0	0	1	FAM46C	chr1:118149384-118149503
13065	0.49688	0.0331918	chr1	+	118149584	118149623	39	395	272	240	1140	583	224	0	2	0	2	2	0	FAM46C	chr1:118149584-118149623
13074	1.26446	0.040691	chr1	+	118472215	118472274	59	72	54	0	0	62	0	0	0	0	0	0	0	WDR3	chr1:118472215-118472274
13074	1.05759	0.0154958	chr1	+	118472295	118472374	79	161	272	131	216	308	0	0	1	0	0	0	0	WDR3	chr1:118472295-118472374
37032	0.436283	0.0423551	chr1	-	142660174	142660233	59	471	754	454	1765	1072	1236	0	0	0	0	0	2		chr1:142660174-142660233
37032	0.523113	0.0338508	chr1	-	142660474	142660533	59	300	420	420	1094	840	417	0	1	0	0	0	0		chr1:142660474-142660533
37035	1.22819	0.00781625	chr1	-	143278719	143278898	179	2747	3234	2007	2840	1916	1673	10	8	7	3	7	4		chr1:143278719-143278898
13148	1.56881	0.0192786	chr1	+	143283088	143283147	59	48	97	17	0	38	0	0	0	0	0	0	0		chr1:143283088-143283147
13148	0.890511	0.00315865	chr1	+	143283548	143283847	299	8602	10977	7016	6024	13664	10470	33	63	31	16	47	34		chr1:143283548-143283847
13169	0.513066	0.03765	chr1	+	144593823	144593862	39	240	285	160	728	452	261	0	0	0	2	0	0	NBPF20	chr1:144593823-144593862
13171	0.656394	0.0289927	chr1	+	144598731	144598790	59	220	317	135	489	237	392	0	0	0	0	0	0	NBPF20	chr1:144598731-144598790
13181	0.742333	0.0106712	chr1	+	145281385	145281524	139	1217	753	914	2000	1055	992	0	0	3	0	0	0	NBPF20 NBPF9 NOTCH2NL	chr1:145281385-145281524
13186	0.561497	0.0386049	chr1	+	145293182	145293201	19	77	120	58	260	169	60	0	0	0	2	0	1	NBPF20 NBPF9 NBPF10 NBPF25P	chr1:145293182-145293201
37064	1.11773	0.00593254	chr1	-	145826648	145826907	259	1033	1920	1024	2524	614	363	2	3	2	0	0	0	GPR89A	chr1:145826648-145826907
37067	1.1265	0.0157778	chr1	-	146548636	146548755	119	251	747	228	584	253	218	0	1	1	0	0	0		chr1:146548636-146548755
37068	1.28889	0.0123999	chr1	-	146549555	146549734	179	652	387	211	212	117	526	1	0	1	0	0	0		chr1:146549555-146549734
37068	1.40848	0.00519177	chr1	-	146549755	146550034	279	728	762	682	639	472	192	0	2	1	0	1	0		chr1:146549755-146550034
37069	0.929293	0.0295284	chr1	-	146550708	146550767	59	171	60	133	256	158	0	1	0	1	0	0	0		chr1:146550708-146550767
37069	1.33948	0.034978	chr1	-	146550808	146550847	39	157	40	46	95	51	5	0	0	0	0	0	0		chr1:146550808-146550847
37069	1.47297	0.00609244	chr1	-	146550868	146550927	59	158	139	60	120	10	60	0	2	0	0	0	0		chr1:146550868-146550927
37069	1.83693	0.0188686	chr1	-	146550968	146551047	79	151	334	25	168	0	5	0	3	1	1	0	0		chr1:146550968-146551047
37069	2.02282	0.00464028	chr1	-	146551148	146551747	599	1354	1373	1295	1007	30	47	4	0	3	2	0	0		chr1:146551148-146551747
37070	1.99327	0.00407711	chr1	-	146551947	146552206	259	868	623	388	419	139	0	0	2	0	0	0	0		chr1:146551947-146552206
13212	1.28183	0.0158991	chr1	+	147400691	147400970	279	794	1192	776	397	714	872	4	2	2	0	2	1	GPR89B	chr1:147400691-147400970
13221	0.713797	0.0339182	chr1	+	148556548	148556587	39	103	141	262	213	156	388	0	0	0	0	0	0	NBPF15	chr1:148556548-148556587
13221	0.64118	0.0300613	chr1	+	148556728	148556787	59	246	184	338	593	428	290	1	0	1	0	0	0	NBPF15	chr1:148556728-148556787
13228	0.839479	0.0319593	chr1	+	149858117	149858156	39	63	120	80	42	207	88	0	0	1	1	0	0	HIST2H2AC	chr1:149858117-149858156
37154	0.602273	0.0182153	chr1	-	149897733	149897892	159	964	1454	592	2114	1864	1334	0	1	1	1	3	0	SF3B4	chr1:149897733-149897892
37157	0.981963	0.0113385	chr1	-	149916804	149916903	99	277	621	637	1139	95	351	0	1	3	0	0	0	OTUD7B	chr1:149916804-149916903
37165	1.70652	0.00310084	chr1	-	150241408	150241467	59	79	0	55	0	4	0	0	0	0	0	0	0	APH1A	chr1:150241408-150241467
37166	1.56584	0.0322805	chr1	-	150532006	150532065	59	0	174	86	3	39	59	0	0	0	0	0	0	ADAMTSL4-AS1	chr1:150532006-150532065
37170	0.545888	0.014846	chr1	-	150550866	150550965	99	1554	1580	1580	4991	2036	1878	3	2	1	2	2	2	MCL1	chr1:150550866-150550965
37170	0.676053	0.0068983	chr1	-	150551326	150551445	119	2146	1938	1306	3883	3112	1168	0	1	2	0	0	0	MCL1	chr1:150551326-150551445
37170	0.776036	0.00762309	chr1	-	150551486	150551785	299	3481	4328	3684	9286	2861	2929	2	4	3	7	1	2	MCL1	chr1:150551486-150551785
37170	1.00043	0.00210926	chr1	-	150551866	150551985	119	1827	1278	1149	1728	1365	1187	5	2	3	1	0	2	MCL1	chr1:150551866-150551985
13250	1.62222	0.00182179	chr1	+	151006294	151006353	59	0	60	52	0	0	0	0	0	0	0	0	0	PRUNE	chr1:151006294-151006353
13261	1.49407	0.0214862	chr1	+	151259944	151260003	59	60	51	87	72	1	0	0	0	0	0	0	0	ZNF687	chr1:151259944-151260003
13261	1.52953	0.0144854	chr1	+	151260704	151260863	159	0	142	129	0	11	0	0	0	0	0	0	0	ZNF687	chr1:151260704-151260863
13263	0.762332	0.0446318	chr1	+	151373945	151373984	39	108	242	40	104	245	200	0	0	0	0	0	0	PSMB4	chr1:151373945-151373984
13263	0.728477	0.0374114	chr1	+	151374005	151374024	19	60	168	38	109	144	140	1	0	0	0	0	0	PSMB4	chr1:151374005-151374024
13264	1.15068	0.00911667	chr1	+	151491104	151491223	119	804	1179	272	922	573	428	0	3	0	0	0	0	CGN	chr1:151491104-151491223
13264	0.665689	0.0405831	chr1	+	151491384	151491423	39	118	176	40	240	181	141	0	0	0	0	0	0	CGN	chr1:151491384-151491423
13264	0.812245	0.0140125	chr1	+	151491664	151491703	39	119	226	120	255	230	130	0	3	0	0	0	0	CGN	chr1:151491664-151491703
13264	0.857471	0.0412198	chr1	+	151491764	151491803	39	40	80	129	275	0	40	0	1	0	0	0	0	CGN	chr1:151491764-151491803
13266	0.879032	0.02378	chr1	+	151513004	151513063	59	232	180	58	209	207	148	0	0	1	0	0	0	TUFT1 CGN	chr1:151513004-151513063
13266	0.486324	0.0413825	chr1	+	151513164	151513223	59	306	458	346	1524	669	284	0	2	0	2	1	0	TUFT1	chr1:151513164-151513223
13269	0.960366	0.0306777	chr1	+	151530225	151530284	59	60	278	108	160	139	177	0	1	0	0	0	0	TUFT1	chr1:151530225-151530284
13270	0.791078	0.0126117	chr1	+	151535063	151535142	79	463	521	173	726	279	526	0	1	0	0	0	0	TUFT1	chr1:151535063-151535142
13271	0.97811	0.0127489	chr1	+	151542164	151542263	99	303	597	624	743	498	328	1	1	0	1	0	0	TUFT1	chr1:151542164-151542263
13273	0.751046	0.00647939	chr1	+	151546753	151546872	119	1538	1237	798	1806	1469	1607	1	1	2	4	0	0	TUFT1	chr1:151546753-151546872
13275	0.708125	0.037629	chr1	+	151551218	151551277	59	387	120	446	518	455	447	0	0	0	0	0	0	TUFT1	chr1:151551218-151551277
13276	0.459539	0.033708	chr1	+	151554335	151554414	79	755	1188	1377	3322	2281	1898	0	0	3	2	3	3	TUFT1	chr1:151554335-151554414
13293	1.67754	0.00557166	chr1	+	151763022	151763181	159	127	113	150	26	15	0	0	1	0	0	0	0		chr1:151763022-151763181
13293	0.865031	0.0239712	chr1	+	151763682	151763721	39	149	97	57	182	41	146	0	0	0	0	0	0		chr1:151763682-151763721
13295	0.983607	0.0413861	chr1	+	152188166	152188225	59	180	60	60	274	30	0	0	0	0	1	0	0		chr1:152188166-152188225
13295	0.695541	0.0310594	chr1	+	152188466	152188505	39	151	80	195	320	193	152	0	0	0	0	0	0		chr1:152188466-152188505
37212	0.622721	0.0220834	chr1	-	153636541	153636600	59	419	519	202	990	632	337	2	1	0	0	0	0	ILF2	chr1:153636541-153636600
37214	0.40281	0.0401605	chr1	-	153640929	153641008	79	1202	1642	1065	4568	3282	2222	1	1	0	2	0	0	ILF2	chr1:153640929-153641008
37215	1.41164	0.0182412	chr1	-	153642672	153642771	99	148	72	135	129	0	35	0	0	0	0	0	0	ILF2	chr1:153642672-153642771
37219	0.743444	0.0373912	chr1	-	153784522	153784581	59	200	154	114	156	307	234	0	1	0	0	0	0	GATAD2B	chr1:153784522-153784581
37220	0.627184	0.0277775	chr1	-	153785771	153785790	19	80	115	60	204	114	137	0	0	2	0	0	0	GATAD2B	chr1:153785771-153785790
37222	0.555783	0.0287519	chr1	-	153800477	153800556	79	398	437	542	587	1024	1076	1	0	2	0	1	0	GATAD2B	chr1:153800477-153800556
37222	0.437229	0.0421746	chr1	-	153800697	153800736	39	383	473	426	714	1191	1209	1	0	2	0	0	0	GATAD2B	chr1:153800697-153800736
37223	1.38961	0.00939357	chr1	-	153920983	153921082	99	98	236	325	46	189	158	0	0	1	0	0	0	DENND4B CRTC2	chr1:153920983-153921082
37224	1.53731	0.00438844	chr1	-	153924444	153924703	259	1274	1256	758	573	392	910	3	4	1	0	2	1	CRTC2	chr1:153924444-153924703
37228	0.852475	0.0120356	chr1	-	153949489	153949628	139	802	817	580	1208	673	782	2	1	1	2	0	0	JTB	chr1:153949489-153949628
37228	1.9104	0.00367967	chr1	-	153950149	153950648	499	941	1188	586	108	287	326	3	2	2	0	0	0	JTB	chr1:153950149-153950648
13326	2.03594	0.0120893	chr1	+	154321520	154321679	159	189	403	227	120	14	26	0	0	1	0	0	0	ATP8B2	chr1:154321520-154321679
13326	1.10208	0.0165979	chr1	+	154321720	154321879	159	440	478	760	518	487	484	0	1	2	0	0	0	ATP8B2	chr1:154321720-154321879
13328	0.67704	0.0328061	chr1	+	154437998	154438057	59	197	180	240	579	306	120	1	1	0	1	0	0	IL6R	chr1:154437998-154438057
37258	0.787356	0.0056101	chr1	-	154901553	154901632	79	742	780	430	1279	484	773	0	0	0	1	0	1	PMVK	chr1:154901553-154901632
13341	0.868012	0.0348417	chr1	+	154987277	154987336	59	90	120	161	241	103	120	0	0	2	0	0	0	ZBTB7B	chr1:154987277-154987336
13342	1.10917	0.041923	chr1	+	154988893	154988972	79	78	110	80	176	0	42	0	0	0	0	0	0	ZBTB7B	chr1:154988893-154988972
13346	1.48688	0.0171274	chr1	+	155030116	155030195	79	70	116	84	9	14	80	0	0	0	0	0	0	ADAM15	chr1:155030116-155030195
37271	1.41284	0.0252786	chr1	-	155224346	155224425	79	62	80	80	0	87	0	0	0	0	0	0	0	FAM189B SCAMP3	chr1:155224346-155224425
37271	1.70888	0.00737381	chr1	-	155224586	155224705	119	211	213	120	151	18	0	0	0	0	0	0	0	FAM189B SCAMP3	chr1:155224586-155224705
37271	0.952972	0.0162693	chr1	-	155225046	155225145	99	278	234	262	251	332	236	0	0	0	0	1	1	FAM189B SCAMP3	chr1:155225046-155225145
37276	1.55024	0.0167872	chr1	-	155233583	155233642	59	82	14	48	0	29	0	0	0	0	0	0	0	SCAMP3 CLK2	chr1:155233583-155233642
37277	1.28439	0.0250701	chr1	-	155238909	155239028	119	216	139	116	152	98	37	0	0	0	0	0	0	CLK2	chr1:155238909-155239028
37277	1.12377	0.00554658	chr1	-	155239289	155239428	139	902	1029	609	1032	740	442	0	0	0	0	0	0	CLK2	chr1:155239289-155239428
37288	1.61538	0.0265968	chr1	-	155619850	155619909	59	0	113	106	7	60	0	0	0	0	0	0	0		chr1:155619850-155619909
37318	0.530191	0.0460249	chr1	-	155903483	155903502	19	80	177	43	276	160	183	0	0	0	0	0	0	KIAA0907	chr1:155903483-155903502
13371	1.93667	0.00711366	chr1	+	156104874	156104973	99	200	77	0	0	0	0	0	1	0	0	0	0	LMNA	chr1:156104874-156104973
13372	0.436129	0.0418989	chr1	+	156105729	156105788	59	772	547	529	2094	1533	835	0	0	0	1	1	0	LMNA	chr1:156105729-156105788
13372	0.514949	0.0320994	chr1	+	156106029	156106108	79	447	761	306	1133	1217	843	1	3	1	2	1	0	LMNA	chr1:156106029-156106108
13375	0.692394	0.0250867	chr1	+	156164161	156164240	79	271	457	270	771	350	427	0	0	0	0	0	0	SLC25A44	chr1:156164161-156164240
13380	1.52271	0.000823677	chr1	+	156186231	156186650	419	67302	51499	42477	68247	19083	17264	769	621	501	901	302	261	PMF1-BGLAP PMF1	chr1:156186231-156186650
37325	0.851868	0.0195192	chr1	-	156186231	156186310	79	933	444	336	1163	456	419	1	0	1	4	1	1		chr1:156186231-156186310
37325	1.71327	0.00288971	chr1	-	156186351	156186610	259	3927	3203	1904	3234	981	742	37	25	12	26	8	7		chr1:156186351-156186610
37327	1.47604	0.0171165	chr1	-	156235598	156235697	99	169	116	366	55	203	89	0	0	1	0	0	0	SMG5	chr1:156235598-156235697
37327	0.84243	0.00339633	chr1	-	156235918	156235997	79	684	729	769	1328	850	483	2	2	4	2	1	0	SMG5	chr1:156235918-156235997
37339	1.63216	0.00846769	chr1	-	156495998	156496097	99	179	96	158	66	70	18	2	0	0	0	0	0	IQGAP3	chr1:156495998-156496097
37342	0.869565	0.0281381	chr1	-	156568054	156568093	39	116	80	80	80	185	75	0	0	1	0	0	0	GPATCH4	chr1:156568054-156568093
37346	1.26171	0.00811336	chr1	-	156698207	156698306	99	130	348	130	186	114	126	0	1	1	0	0	0	ISG20L2	chr1:156698207-156698306
13386	0.839709	0.0196441	chr1	+	156737964	156738003	39	136	153	52	254	96	79	0	0	0	0	0	0	PRCC	chr1:156737964-156738003
37353	1.0906	0.00687885	chr1	-	156909358	156909577	219	859	1816	1083	2142	936	324	1	2	0	0	0	0	ARHGEF11	chr1:156909358-156909577
37353	0.971981	0.0148121	chr1	-	156909598	156909717	119	591	636	421	993	311	406	1	0	0	0	0	0	ARHGEF11	chr1:156909598-156909717
37353	1.75453	0.0134139	chr1	-	156909958	156910057	99	70	480	211	208	0	99	0	1	0	0	0	0	ARHGEF11	chr1:156909958-156910057
37353	1.22629	0.0290362	chr1	-	156910118	156910177	59	60	103	222	180	59	45	0	1	0	0	0	0	ARHGEF11	chr1:156910118-156910177
37354	1.66807	0.0191541	chr1	-	157014113	157014172	59	117	100	0	42	0	12	0	0	0	1	0	0	ARHGEF11	chr1:157014113-157014172
37368	0.946087	0.0280141	chr1	-	160001233	160001292	59	163	77	120	148	171	76	0	0	1	0	0	0	PIGM	chr1:160001233-160001292
37392	0.889549	0.0301035	chr1	-	160281587	160281666	79	211	209	89	137	195	266	0	0	0	0	0	1	COPA	chr1:160281587-160281666
37407	0.844073	0.0126628	chr1	-	161009200	161009299	99	593	378	437	528	803	402	1	0	1	0	0	0	USF1 TSTD1	chr1:161009200-161009299
37418	0.654472	0.0425719	chr1	-	161146264	161146303	39	200	80	83	340	132	146	0	0	0	0	0	0	B4GALT3	chr1:161146264-161146303
13422	1.01941	0.00700558	chr1	+	161228764	161228883	119	1045	1154	636	1382	713	675	1	1	0	2	0	1	PCP4L1	chr1:161228764-161228883
13422	0.645216	0.0125246	chr1	+	161228944	161229023	79	944	609	465	1620	966	666	0	1	1	1	3	1	PCP4L1	chr1:161228944-161229023
13431	1.90997	0.000721088	chr1	+	161369850	161369969	119	464	1088	842	528	50	498	0	0	1	2	0	0		chr1:161369850-161369969
37435	0.892707	0.0268612	chr1	-	167522635	167522734	99	338	137	262	373	205	299	0	0	7	2	0	2	CREG1	chr1:167522635-167522734
13500	1.09552	0.0182364	chr1	+	169076033	169076072	39	103	87	53	80	0	135	1	0	0	0	0	0	ATP1B1	chr1:169076033-169076072
13538	1.82459	0.00234177	chr1	+	171753410	171753529	119	454	234	265	163	81	120	0	2	0	0	0	0	METTL13	chr1:171753410-171753529
13551	0.906489	0.040257	chr1	+	172502170	172502229	59	55	176	60	60	160	120	0	1	0	1	0	0	SUCO	chr1:172502170-172502229
13551	1.25	0.0126304	chr1	+	172502530	172502589	59	219	108	138	94	153	89	0	0	0	0	0	0	SUCO	chr1:172502530-172502589
37657	1.17211	0.0142423	chr1	-	173110257	173110456	199	400	538	681	1072	106	122	0	2	0	0	0	0		chr1:173110257-173110456
37657	1.31303	0.0166001	chr1	-	173111237	173111316	79	125	165	91	214	0	22	0	0	1	0	0	0		chr1:173111237-173111316
37741	0.889007	0.0253853	chr1	-	173446553	173446632	79	158	144	291	321	216	160	0	0	0	0	0	0	LOC100506023	chr1:173446553-173446632
37741	1.82187	0.0114698	chr1	-	173446693	173446832	139	389	218	139	109	55	56	0	0	0	0	0	0	LOC100506023	chr1:173446693-173446832
37741	0.810433	0.0382495	chr1	-	173447013	173447072	59	60	220	173	128	240	238	0	0	1	0	0	0	LOC100506023	chr1:173447013-173447072
37844	0.568134	0.0113542	chr1	-	173776431	173776490	59	518	1328	643	1511	1513	1506	1	2	1	2	2	0	CENPL	chr1:173776431-173776490
37848	1.05096	0.00869425	chr1	-	173793288	173793587	299	1489	2185	1518	2296	1209	1391	1	0	2	2	0	1	CENPL	chr1:173793288-173793587
37848	1.002	0.0230325	chr1	-	173793968	173794047	79	284	367	105	286	239	229	0	0	1	1	0	0	CENPL	chr1:173793968-173794047
37858	0.641887	0.0296324	chr1	-	173818726	173818785	59	118	355	237	420	383	412	0	2	0	1	0	0		chr1:173818726-173818785
37873	1.79752	0.00291953	chr1	-	174968954	174969033	79	0	111	80	2	0	0	0	0	1	0	0	0		chr1:174968954-174969033
13623	1.57812	0.0118062	chr1	+	179923837	179923916	79	80	0	80	16	0	0	1	0	0	0	0	0	CEP350	chr1:179923837-179923916
13646	0.928571	0.0235518	chr1	+	180885513	180885592	79	125	373	172	293	270	177	0	0	0	0	0	0	KIAA1614	chr1:180885513-180885592
13646	1.45036	0.0117472	chr1	+	180885833	180885952	119	260	195	193	109	177	49	0	0	0	0	0	0	KIAA1614	chr1:180885833-180885952
13647	3.2398	0.000502905	chr1	+	180904250	180904369	119	328	414	164	32	0	0	1	0	0	0	0	0	KIAA1614	chr1:180904250-180904369
13647	1.2686	0.011935	chr1	+	180904570	180904649	79	140	158	157	203	108	0	1	0	0	0	0	0	KIAA1614	chr1:180904570-180904649
13647	0.926198	0.0161667	chr1	+	180904850	180905109	259	1082	1377	652	2001	540	893	1	1	1	0	0	0	KIAA1614	chr1:180904850-180905109
13647	1.01273	0.0252526	chr1	+	180905330	180905409	79	201	91	184	115	224	128	0	0	0	0	0	0	KIAA1614	chr1:180905330-180905409
13647	1.49524	0.00826796	chr1	+	180905450	180905809	359	1546	1300	917	1343	445	383	3	2	1	1	0	0	KIAA1614	chr1:180905450-180905809
13650	1.13158	0.0118316	chr1	+	180957557	180957676	119	361	297	354	247	133	476	0	0	1	0	0	0		chr1:180957557-180957676
13650	0.906061	0.0102683	chr1	+	180957717	180957796	79	364	417	171	513	264	303	1	0	0	0	0	0		chr1:180957717-180957796
13654	0.491206	0.0127148	chr1	+	181057963	181058202	239	4292	4143	3840	10397	9236	6254	9	13	4	7	6	2	IER5	chr1:181057963-181058202
13654	2.31305	0.00111703	chr1	+	181058303	181058542	239	1672	1451	1903	972	726	76	1	4	3	1	0	0	IER5	chr1:181058303-181058542
13654	1.04604	0.00449227	chr1	+	181058683	181059242	559	8088	8690	5837	11338	4787	5469	11	9	1	5	2	1	IER5	chr1:181058683-181059242
13654	0.882677	0.00932252	chr1	+	181059343	181059542	199	3297	2775	2263	3870	3715	1956	3	4	5	3	5	1	IER5	chr1:181059343-181059542
37909	1.19861	0.0232698	chr1	-	182359952	182360011	59	99	60	180	0	193	60	0	0	0	0	0	0	GLUL	chr1:182359952-182360011
13659	0.59403	0.0171139	chr1	+	182822452	182822551	99	1186	982	760	1927	1646	1588	2	2	0	0	0	0	DHX9	chr1:182822452-182822551
13674	1.19053	0.00543924	chr1	+	182993082	182993281	199	930	650	930	893	717	393	2	0	0	1	3	0	LAMC1	chr1:182993082-182993281
13674	1.76179	0.00846274	chr1	+	182993322	182993421	99	87	163	160	0	100	3	0	0	0	0	0	0	LAMC1	chr1:182993322-182993421
37924	0.923823	0.00747268	chr1	-	185268860	185268979	119	562	791	846	753	1071	591	0	0	3	1	1	0	IVNS1ABP	chr1:185268860-185268979
37925	0.682292	0.0342286	chr1	-	185270151	185270190	39	171	96	137	394	128	126	0	0	0	0	0	0	IVNS1ABP	chr1:185270151-185270190
37930	0.798036	0.0196277	chr1	-	185286152	185286271	119	481	638	951	1312	1044	331	0	0	2	2	0	0	IVNS1ABP	chr1:185286152-185286271
37938	0.445667	0.0431926	chr1	-	186292833	186292912	79	719	637	931	1883	1394	2191	2	4	0	3	0	1	MIR548F1 TPR	chr1:186292833-186292912
37966	0.521408	0.0240303	chr1	-	186344264	186344383	119	657	1287	1086	3585	1446	1128	2	0	6	3	2	6	MIR548F1 TPR	chr1:186344264-186344383
13695	0.915114	0.0207417	chr1	+	186344900	186344979	79	220	285	135	239	395	92	0	1	0	0	0	0	C1orf27	chr1:186344900-186344979
13994	0.468271	0.048896	chr1	+	190445226	190445245	19	120	120	120	640	74	128	1	1	0	3	0	0		chr1:190445226-190445245
14490	0.939276	0.00534838	chr1	+	193029009	193029048	39	226	209	164	267	266	109	2	0	0	3	0	0	TROVE2	chr1:193029009-193029048
37986	1.69231	0.0233909	chr1	-	194585343	194585402	59	51	121	0	18	7	3	0	0	0	0	0	0		chr1:194585343-194585402
38036	0.578291	0.0347063	chr1	-	197097699	197097738	39	160	703	586	815	989	799	0	2	0	0	1	0	ASPM	chr1:197097699-197097738
38039	0.928161	0.00909796	chr1	-	197115296	197115595	299	1689	2305	1861	3234	1590	1548	2	1	4	7	1	1	ASPM	chr1:197115296-197115595
38054	1.60556	0.00221176	chr1	-	197744272	197744331	59	60	0	49	0	0	0	0	0	0	0	0	0	DENND1B	chr1:197744272-197744331
38084	0.499741	0.0370719	chr1	-	200378361	200378440	79	696	533	451	1154	1063	1393	2	1	0	1	1	2	ZNF281	chr1:200378361-200378440
38084	1.42657	0.0256276	chr1	-	200378841	200378900	59	82	34	108	49	53	4	0	1	0	0	0	0	ZNF281	chr1:200378841-200378900
14568	0.612995	0.0185915	chr1	+	200708209	200708288	79	564	662	251	1184	1071	306	0	0	0	0	0	0	CAMSAP2	chr1:200708209-200708288
14568	1.52838	0.0104335	chr1	+	200708369	200708588	219	500	528	453	549	70	148	2	4	4	0	0	0	CAMSAP2	chr1:200708369-200708588
14586	1.79295	0.00286132	chr1	+	202317876	202318135	259	987	1945	1080	953	230	728	3	5	2	1	0	0	PPP1R12B	chr1:202317876-202318135
14586	0.817204	0.0356623	chr1	+	202318176	202318215	39	173	106	57	251	147	40	0	0	0	0	0	0	PPP1R12B	chr1:202318176-202318215
38109	1.87351	0.00383549	chr1	-	202935583	202935682	99	172	147	166	119	0	0	0	0	0	0	0	0	CYB5R1	chr1:202935583-202935682
38109	1.32963	0.0358909	chr1	-	202935783	202935842	59	86	34	59	60	0	30	0	0	0	0	0	0	CYB5R1	chr1:202935783-202935842
38113	0.636632	0.0150037	chr1	-	204380140	204380239	99	931	1167	815	2156	1864	744	1	2	1	2	0	0	PPP1R15B	chr1:204380140-204380239
38113	0.598032	0.011466	chr1	-	204380340	204380519	179	2692	2163	1675	4748	3073	3436	2	5	3	12	2	9	PPP1R15B	chr1:204380340-204380519
38113	1.29573	0.000342941	chr1	-	204380560	204380679	119	2131	1493	1192	2305	687	635	0	2	2	2	1	2	PPP1R15B	chr1:204380560-204380679
38124	1.84516	0.0107311	chr1	-	205272892	205273051	159	287	229	148	57	50	33	0	0	0	0	0	0	NUAK2	chr1:205272892-205273051
38125	0.857537	0.0368006	chr1	-	205290556	205290675	119	207	716	270	500	799	144	0	0	0	1	1	0	NUAK2	chr1:205290556-205290675
14614	1.01	0.0128427	chr1	+	205601402	205601521	119	460	297	293	768	259	1	0	0	1	3	0	0		chr1:205601402-205601521
38144	1.43088	0.0183628	chr1	-	205765024	205765123	99	103	90	124	12	122	0	0	0	1	0	0	0	SLC41A1	chr1:205765024-205765123
38146	0.62004	0.0133774	chr1	-	205779319	205779438	119	1603	1301	1326	3611	2306	1142	3	2	0	1	2	1	SLC41A1	chr1:205779319-205779438
38146	0.722839	0.0101837	chr1	-	205779579	205779718	139	1385	1477	807	2569	1345	1309	0	3	1	3	3	3	SLC41A1	chr1:205779579-205779718
38146	0.493116	0.0429723	chr1	-	205779919	205779958	39	624	219	374	929	880	827	5	1	0	1	0	0	SLC41A1	chr1:205779919-205779958
38146	0.537125	0.022688	chr1	-	205780039	205780158	119	1409	1369	1245	3089	2895	1827	0	2	0	0	0	1	SLC41A1	chr1:205780039-205780158
14625	0.702005	0.0216335	chr1	+	206730845	206730964	119	645	445	608	1461	632	486	0	1	1	1	0	0	RASSF5	chr1:206730845-206730964
14631	1.5	0.0178245	chr1	+	206902979	206903038	59	60	0	60	0	13	7	0	0	0	0	0	0	MAPKAPK2	chr1:206902979-206903038
14631	0.904579	0.0107678	chr1	+	206903339	206903438	99	318	833	884	782	1103	414	0	1	3	0	0	0	MAPKAPK2	chr1:206903339-206903438
14632	0.584076	0.0298975	chr1	+	206906062	206906121	59	276	346	235	440	549	623	1	2	0	1	0	0	MAPKAPK2	chr1:206906062-206906121
14639	0.721607	0.0266782	chr1	+	207936036	207936075	39	120	205	72	80	217	305	1	0	0	0	0	0	CD46	chr1:207936036-207936075
14639	0.532258	0.0429956	chr1	+	207936156	207936175	19	85	120	65	326	139	95	0	0	0	0	0	0	CD46	chr1:207936156-207936175
14639	0.514727	0.0406464	chr1	+	207936196	207936215	19	88	151	68	340	164	149	0	0	0	0	0	0	CD46	chr1:207936196-207936215
14639	0.51956	0.0326694	chr1	+	207936236	207936255	19	97	186	78	377	197	184	0	0	1	0	0	0	CD46	chr1:207936236-207936255
14639	0.975251	0.0243956	chr1	+	207936776	207936915	139	166	507	353	140	400	527	0	0	3	1	1	0	CD46	chr1:207936776-207936915
38169	0.749604	0.0294711	chr1	-	211751797	211751836	39	79	146	124	297	90	120	0	0	1	1	0	0	SLC30A1	chr1:211751797-211751836
14651	1.50218	0.00548661	chr1	+	212459005	212459084	79	160	208	80	218	0	0	0	0	0	0	0	0	PPP2R5A	chr1:212459005-212459084
14655	1.02998	0.0109124	chr1	+	212782105	212782344	239	1574	2834	1271	2678	1037	1800	3	6	6	4	1	4	ATF3	chr1:212782105-212782344
14655	0.753304	0.0237874	chr1	+	212782465	212782524	59	212	203	423	594	336	252	0	1	1	0	0	0	ATF3	chr1:212782465-212782524
14655	1.05684	0.0342678	chr1	+	212782605	212782684	79	139	162	54	143	13	167	0	0	0	0	0	0	ATF3	chr1:212782605-212782684
14655	0.890191	0.00982473	chr1	+	212782765	212782904	139	629	551	670	1093	801	241	1	0	1	1	0	0	ATF3	chr1:212782765-212782904
14655	0.60459	0.0217094	chr1	+	212782965	212783124	159	784	1289	886	2717	844	1659	0	3	0	2	0	0	ATF3	chr1:212782965-212783124
14657	1.58181	0.0132196	chr1	+	213031996	213032175	179	927	426	603	468	348	223	0	0	2	0	1	0	FLVCR1	chr1:213031996-213032175
38198	1.36709	0.0300057	chr1	-	217804198	217804257	59	15	60	61	3	6	48	0	0	2	0	0	0	GPATCH2	chr1:217804198-217804257
14695	0.832009	0.0265945	chr1	+	220267684	220267743	59	242	185	126	387	314	0	0	0	0	0	0	0	RNU5F-1 IARS2	chr1:220267684-220267743
14710	0.882417	0.0155172	chr1	+	222837358	222837457	99	580	404	333	617	460	460	0	1	0	0	0	0	MIA3	chr1:222837358-222837457
14717	1.50901	0.0224627	chr1	+	224302335	224302394	59	0	102	53	42	0	0	0	0	0	0	0	0	FBXO28	chr1:224302335-224302394
38243	0.603475	0.0154674	chr1	-	224588668	224588767	99	974	1395	1224	2324	1781	2067	3	2	3	3	3	2	WDR26	chr1:224588668-224588767
38246	0.869928	0.00868157	chr1	-	224607229	224607308	79	456	439	315	722	479	235	0	1	1	0	0	0	WDR26	chr1:224607229-224607308
38248	2.09333	0.00769382	chr1	-	224621178	224621257	79	94	172	271	135	0	0	0	1	1	0	0	0	WDR26	chr1:224621178-224621257
38248	2.04452	0.00232088	chr1	-	224621378	224622157	779	6955	8343	6448	4665	1732	3105	26	16	22	8	1	7	WDR26	chr1:224621378-224622157
14737	0.708027	0.0283926	chr1	+	225661996	225662135	139	428	773	298	342	1220	718	0	1	0	0	4	0		chr1:225661996-225662135
14738	0.840304	0.0324557	chr1	+	225662311	225662390	79	400	102	359	485	426	160	0	0	1	0	1	0		chr1:225662311-225662390
14738	1.12189	0.0107561	chr1	+	225662991	225663070	79	132	245	231	240	144	135	0	1	1	0	1	0		chr1:225662991-225663070
14738	1.63037	0.00771878	chr1	+	225663291	225663550	259	350	375	127	0	85	136	0	0	0	0	0	0		chr1:225663291-225663550
38282	0.948753	0.0236309	chr1	-	226923318	226923377	59	152	298	55	251	231	60	0	0	0	0	0	0	ITPKB	chr1:226923318-226923377
38282	0.937179	0.0291656	chr1	-	226923578	226923657	79	246	80	165	495	45	0	0	0	0	0	0	0	ITPKB	chr1:226923578-226923657
38282	1.16782	0.0122702	chr1	-	226924398	226924517	119	387	206	226	511	19	119	0	0	1	1	0	0	ITPKB	chr1:226924398-226924517
38282	1.55897	0.0110118	chr1	-	226924918	226924977	59	60	60	0	15	0	0	1	0	0	0	0	0	ITPKB	chr1:226924918-226924977
14748	0.558644	0.0361086	chr1	+	227152896	227152955	59	257	381	175	929	506	180	3	0	0	1	0	0	ADCK3	chr1:227152896-227152955
14752	0.600314	0.0363442	chr1	+	228285061	228285140	79	249	464	193	892	769	0	0	0	0	0	2	0	ARF1 MIR3620	chr1:228285061-228285140
38283	1.15373	0.0322014	chr1	-	228290642	228290741	99	289	94	86	140	68	158	1	0	0	1	0	0	C1orf35	chr1:228290642-228290741
38284	1.38189	0.0250614	chr1	-	228294097	228294156	59	52	60	59	74	0	0	0	0	0	0	0	0	MRPL55	chr1:228294097-228294156
14753	0.652299	0.0449403	chr1	+	228328118	228328177	59	153	219	129	463	279	118	0	0	0	0	1	0	GUK1	chr1:228328118-228328177
14753	1.579	0.00162142	chr1	+	228328198	228328297	99	296	512	411	499	124	35	0	0	0	1	0	0	GUK1	chr1:228328198-228328297
14753	0.602904	0.0349707	chr1	+	228328478	228328537	59	279	202	294	886	333	185	0	0	0	0	0	0	GUK1	chr1:228328478-228328537
14753	1.22864	0.0082685	chr1	+	228328598	228328857	259	1586	993	1099	1345	1080	434	10	5	3	6	4	2	GUK1	chr1:228328598-228328857
14753	0.643312	0.0388634	chr1	+	228328878	228328917	39	46	207	120	367	179	115	1	2	0	0	1	0	GUK1	chr1:228328878-228328917
14753	1.5972	0.00310307	chr1	+	228328958	228329077	119	295	757	400	325	357	100	0	2	1	0	0	0	GUK1	chr1:228328958-228329077
14753	0.689848	0.0282155	chr1	+	228329138	228329197	59	211	174	294	625	381	65	0	1	0	0	0	0	GUK1	chr1:228329138-228329197
14753	1.60579	0.00486972	chr1	+	228329258	228329677	419	3104	1967	3393	2381	1202	1227	3	1	5	1	1	0	GUK1	chr1:228329258-228329677
14753	1.81494	0.0102256	chr1	+	228329878	228330037	159	1334	1270	515	1015	469	22	2	2	1	2	0	0	GUK1	chr1:228329878-228330037
14753	1.18727	0.0138047	chr1	+	228330058	228330117	59	199	114	141	234	60	60	0	0	0	0	0	0	GUK1	chr1:228330058-228330117
14753	1.66106	0.00491202	chr1	+	228330358	228330477	119	697	435	287	315	156	240	0	0	0	0	0	0	GUK1	chr1:228330358-228330477
14754	0.838849	0.0263716	chr1	+	228333239	228333338	99	382	164	316	635	145	310	1	0	0	0	0	0	GUK1	chr1:228333239-228333338
14754	1.21824	0.0106568	chr1	+	228333719	228333758	39	66	120	68	69	78	40	0	0	0	0	0	0	GUK1	chr1:228333719-228333758
14755	0.824928	0.0175366	chr1	+	228334232	228334311	79	289	305	307	268	558	318	1	0	0	0	1	0	GUK1	chr1:228334232-228334311
14757	1.57037	0.0100565	chr1	+	228362487	228362566	79	168	59	169	42	102	21	0	0	0	0	0	0	IBA57	chr1:228362487-228362566
38306	0.777319	0.0226988	chr1	-	231472935	231473114	179	604	973	880	2035	743	533	1	2	0	2	3	0	EXOC8	chr1:231472935-231473114
38320	1.65	0.00103179	chr1	-	235292211	235292290	79	80	0	76	0	0	0	0	0	0	0	0	0	TOMM20 SNORA14B	chr1:235292211-235292290
38387	1.14809	0.00529494	chr1	-	247094902	247095241	339	1398	2358	1290	2140	760	1353	1	2	2	1	2	4	AHCTF1	chr1:247094902-247095241
7491	1.60894	0.0160467	chr10	-	3180532	3180611	79	366	179	75	156	80	57	1	0	0	1	0	0	PITRM1	chr10:3180532-3180611
7491	0.858663	0.0347373	chr10	-	3180652	3180711	59	134	87	160	269	60	149	0	1	0	0	0	0	PITRM1	chr10:3180652-3180711
7491	2.11307	0.00151969	chr10	-	3180792	3180871	79	88	116	154	0	0	43	0	0	0	0	0	0	PITRM1	chr10:3180792-3180871
389	1.44202	0.00907601	chr10	+	5726984	5727083	99	159	299	96	152	88	55	0	1	0	0	0	0	FAM208B	chr10:5726984-5727083
407	0.64581	0.0384722	chr10	+	6154229	6154328	99	190	820	393	1243	601	493	0	0	0	0	0	0	RBM17	chr10:6154229-6154328
409	1.53333	0.0116971	chr10	+	6244794	6244873	79	0	65	63	0	0	0	0	0	0	0	0	0	PFKFB3	chr10:6244794-6244873
410	1.84592	0.00423479	chr10	+	6246100	6246179	79	71	216	84	83	0	8	0	0	0	0	0	0	PFKFB3	chr10:6246100-6246179
410	1.57727	0.0206932	chr10	+	6246280	6246419	139	414	74	480	200	184	76	0	0	0	0	0	0	PFKFB3	chr10:6246280-6246419
411	1.31228	0.0170444	chr10	+	6275149	6275248	99	238	98	112	170	100	0	0	0	0	0	0	0	PFKFB3	chr10:6275149-6275248
411	1.4148	0.0148228	chr10	+	6275349	6275428	79	74	186	127	24	54	124	0	0	1	0	0	1	PFKFB3	chr10:6275349-6275428
417	0.569018	0.0401192	chr10	+	7860615	7860694	79	468	270	329	879	606	586	1	1	0	0	0	0	TAF3	chr10:7860615-7860694
468	0.464337	0.0397832	chr10	+	17271532	17271571	39	238	514	417	1979	295	382	0	0	0	0	0	0	VIM	chr10:17271532-17271571
7540	0.973574	0.00955912	chr10	-	18828126	18828265	139	606	621	445	849	617	271	0	2	0	0	0	0		chr10:18828126-18828265
7554	0.895753	0.0194062	chr10	-	22292373	22292412	39	118	70	152	160	158	80	1	0	0	0	0	0	DNAJC1	chr10:22292373-22292412
7562	1.24804	0.0156805	chr10	-	25013109	25013188	79	272	115	160	172	172	53	0	0	2	0	0	0	ARHGAP21	chr10:25013109-25013188
491	1.62393	0.0106285	chr10	+	26937070	26937189	119	199	330	247	82	70	190	0	1	0	0	0	0	LINC00202-2	chr10:26937070-26937189
495	1.20074	0.019724	chr10	+	27547696	27547775	79	189	150	65	142	0	161	0	2	0	0	0	0		chr10:27547696-27547775
496	1.75833	0.00125977	chr10	+	27793371	27793450	79	102	80	0	0	0	0	0	0	0	0	0	0	RAB18	chr10:27793371-27793450
7592	0.864706	0.0339801	chr10	-	31875742	31875781	39	118	56	135	277	33	80	1	1	1	0	0	0		chr10:31875742-31875781
515	0.720436	0.0202731	chr10	+	32216797	32216876	79	472	370	228	436	450	709	0	2	1	0	0	0		chr10:32216797-32216876
515	1.12912	0.0171035	chr10	+	32216997	32217076	79	264	145	138	145	312	0	0	0	0	0	0	0		chr10:32216997-32217076
520	1.19737	0.0393047	chr10	+	33247577	33247636	59	60	60	60	4	120	0	0	1	0	0	0	0		chr10:33247577-33247636
7637	0.711712	0.0314526	chr10	-	38445825	38446004	179	519	724	346	1450	476	527	1	0	0	0	1	0		chr10:38445825-38446004
563	0.826484	0.0125564	chr10	+	42971220	42971379	159	1073	928	946	2281	708	684	2	0	1	0	1	1	LINC00839	chr10:42971220-42971379
564	0.840804	0.0370797	chr10	+	42972777	42972836	59	97	171	96	183	120	164	0	0	0	0	0	0	LINC00839	chr10:42972777-42972836
7666	1.08772	0.0332137	chr10	-	45462953	45463012	59	60	99	95	35	120	60	0	0	0	0	1	0		chr10:45462953-45463012
7666	2.25248	0.0183819	chr10	-	45463073	45463132	59	0	215	60	22	0	0	0	0	0	0	0	0		chr10:45463073-45463132
7667	1.58333	0.0323694	chr10	-	45468313	45468372	59	0	140	60	60	0	0	0	0	0	0	0	0		chr10:45468313-45468372
7667	1.05128	0.0336398	chr10	-	45468813	45468872	59	60	97	114	0	184	65	0	0	0	0	0	0		chr10:45468813-45468872
7667	1.21143	0.0212615	chr10	-	45469233	45469332	99	121	263	164	37	270	89	0	0	0	0	1	0		chr10:45469233-45469332
7667	1.10695	0.0127922	chr10	-	45469933	45470192	259	726	632	510	879	580	160	1	1	1	0	1	0	C10orf10	chr10:45469933-45470192
7667	1.79524	0.0302909	chr10	-	45470473	45470512	39	177	40	40	22	57	11	0	0	0	0	0	0	C10orf10	chr10:45470473-45470512
7667	1.23834	0.0213858	chr10	-	45470693	45470812	119	446	184	201	391	118	96	0	1	0	0	0	0	C10orf10	chr10:45470693-45470812
7668	0.419643	0.0480993	chr10	-	45472082	45472101	19	326	206	113	814	464	342	0	0	0	0	0	0	C10orf10	chr10:45472082-45472101
7668	0.776897	0.00981352	chr10	-	45472842	45473481	639	7914	5324	5790	12820	6830	5443	11	11	7	15	7	3	C10orf10	chr10:45472842-45473481
600	0.985426	0.0203608	chr10	+	52834163	52834242	79	325	166	144	344	198	106	1	0	0	0	0	1	PRKG1	chr10:52834163-52834242
600	0.607603	0.0192189	chr10	+	52834343	52834662	319	1841	3003	2232	6514	2756	3039	2	5	2	2	2	0	PRKG1	chr10:52834343-52834662
668	1.34226	0.0151027	chr10	+	70716076	70716135	59	103	108	60	117	31	8	0	0	0	0	0	0	DDX21	chr10:70716076-70716135
692	1.01313	0.00967027	chr10	+	74033837	74034236	399	2193	1896	1397	3050	1577	784	2	2	3	3	1	0	DDIT4	chr10:74033837-74034236
692	1.0303	0.040187	chr10	+	74034277	74034316	39	168	80	40	105	153	14	0	0	0	1	0	0	DDIT4	chr10:74034277-74034316
692	0.904245	0.01983	chr10	+	74034517	74034596	79	324	237	115	482	118	169	0	0	0	1	0	0	DDIT4	chr10:74034517-74034596
692	1.0759	0.01317	chr10	+	74034717	74034856	139	956	526	528	905	609	328	1	0	1	0	1	0	DDIT4	chr10:74034717-74034856
692	0.766353	0.0226789	chr10	+	74034937	74035016	79	1632	1062	451	2331	1132	745	8	1	0	2	1	1	DDIT4	chr10:74034937-74035016
7859	1.23241	0.0243361	chr10	-	74118581	74118660	79	84	129	117	36	32	161	0	2	0	0	0	0	MIR1256	chr10:74118581-74118660
7872	1.18931	0.00595502	chr10	-	74856278	74856437	159	502	669	650	487	737	261	1	5	3	0	0	0	P4HA1	chr10:74856278-74856437
7880	1.60458	0.00799751	chr10	-	74927861	74927960	99	0	100	83	0	6	0	0	0	2	0	0	0	ECD	chr10:74927861-74927960
7885	0.99095	0.00772601	chr10	-	75006766	75006925	159	830	677	1063	1211	957	434	1	2	1	1	2	0	DNAJC9 MRPS16	chr10:75006766-75006925
702	0.85918	0.0209245	chr10	+	75545712	75545831	119	544	307	235	986	144	193	0	0	0	0	0	0	ZSWIM8	chr10:75545712-75545831
702	1.44307	0.0340748	chr10	+	75545952	75546051	99	76	182	21	82	5	13	0	1	0	1	0	0	ZSWIM8	chr10:75545952-75546051
705	1.08144	0.0303126	chr10	+	75758075	75758154	79	90	153	88	91	85	104	0	0	0	0	1	1	VCL	chr10:75758075-75758154
708	0.694155	0.0405793	chr10	+	75911428	75911507	79	148	325	146	648	279	78	0	2	0	1	0	0	ADK	chr10:75911428-75911507
719	2.26667	0.000267537	chr10	+	76970740	76970839	99	182	0	190	0	0	0	0	0	2	0	0	0	VDAC2	chr10:76970740-76970839
719	0.679962	0.0359936	chr10	+	76970980	76971039	59	205	186	145	493	251	129	0	0	0	0	0	0	VDAC2	chr10:76970980-76971039
7913	0.607505	0.0329848	chr10	-	88854372	88854411	39	144	240	87	497	221	148	0	2	0	0	0	0	GLUD1	chr10:88854372-88854411
7917	1.09001	0.0144476	chr10	-	89621396	89621495	99	140	247	306	187	311	113	0	0	0	0	0	0	KLLN	chr10:89621396-89621495
7917	1.37525	0.0159051	chr10	-	89621596	89621775	179	242	232	342	138	308	0	0	0	0	0	0	0	KLLN	chr10:89621596-89621775
7917	1.08835	0.0114371	chr10	-	89621856	89621955	99	320	287	247	257	300	207	0	0	1	0	0	0	KLLN	chr10:89621856-89621955
750	0.613925	0.0176164	chr10	+	89624030	89624149	119	1431	735	1058	3076	1657	770	5	3	2	4	4	2	PTEN	chr10:89624030-89624149
779	0.484153	0.0437589	chr10	+	93683613	93683652	39	273	249	240	833	442	431	1	0	0	0	0	1	BTAF1	chr10:93683613-93683652
805	0.575114	0.0315303	chr10	+	96305611	96305670	59	359	334	256	793	591	397	1	0	1	3	1	0	HELLS	chr10:96305611-96305670
7940	1.82667	0.00113725	chr10	-	98346316	98346415	99	126	65	57	0	0	0	0	0	0	0	0	0	TM9SF3	chr10:98346316-98346415
7943	0.730579	0.035378	chr10	-	99093328	99093367	39	90	135	97	181	166	138	0	0	0	0	0	0	FRAT2	chr10:99093328-99093367
7944	1.43277	0.00890722	chr10	-	99116344	99116463	119	236	216	115	98	184	5	0	0	0	0	0	0	RRP12	chr10:99116344-99116463
7944	0.709236	0.015514	chr10	-	99116484	99116583	99	1287	696	558	1170	981	1558	2	0	0	0	1	1	RRP12	chr10:99116484-99116583
7944	0.847091	0.00770185	chr10	-	99116644	99116883	239	1766	2177	1854	4165	1621	1191	1	2	2	4	1	0	RRP12	chr10:99116644-99116883
7945	1.96951	0.01272	chr10	-	99126081	99126180	99	96	250	0	28	0	0	0	0	0	0	0	0	RRP12	chr10:99126081-99126180
7945	0.846311	0.0115464	chr10	-	99126241	99126360	119	437	707	568	797	533	763	0	0	1	0	0	0	RRP12	chr10:99126241-99126360
7946	2.90775	0.000421179	chr10	-	99126401	99126660	259	1950	1071	2310	489	508	326	1	0	0	0	0	0	RRP12	chr10:99126401-99126660
7947	1.90499	0.00147384	chr10	-	99130534	99130673	139	207	62	113	0	1	0	0	0	0	0	0	0	RRP12	chr10:99130534-99130673
7947	1.70383	0.00312761	chr10	-	99130694	99131033	339	1303	1976	1332	1486	715	98	4	1	1	0	0	0	RRP12	chr10:99130694-99131033
7948	0.676114	0.0160836	chr10	-	99160102	99160281	179	1294	879	913	2333	1229	1245	0	0	0	3	1	0	RRP12	chr10:99160102-99160281
7958	1.63563	0.0478109	chr10	-	101379621	101379660	39	0	115	169	40	40	47	0	0	0	0	0	0	SLC25A28	chr10:101379621-101379660
7958	0.924433	0.0319246	chr10	-	101379681	101379720	39	40	78	125	160	0	117	0	0	1	0	0	0	SLC25A28	chr10:101379681-101379720
7958	1.91743	0.0155008	chr10	-	101379901	101379960	59	60	135	43	27	0	11	0	0	0	0	0	0	SLC25A28	chr10:101379901-101379960
850	1.30851	0.0139439	chr10	+	102748411	102748490	79	118	356	143	74	264	80	0	1	0	0	0	0	C10orf2	chr10:102748411-102748490
850	0.740638	0.024286	chr10	+	102748911	102748950	39	76	175	159	193	282	126	0	0	1	0	0	0	C10orf2	chr10:102748911-102748950
7983	1.56745	0.00880575	chr10	-	103577583	103577682	99	232	348	239	199	176	44	0	2	0	0	0	0	MGEA5	chr10:103577583-103577682
7983	1.19012	0.0420911	chr10	-	103577703	103577742	39	38	245	75	92	104	85	0	1	0	1	0	0	MGEA5	chr10:103577703-103577742
7983	0.685185	0.0233806	chr10	-	103577763	103577862	99	465	538	190	972	426	504	2	1	3	1	1	1	MGEA5	chr10:103577763-103577862
7984	0.53631	0.0251971	chr10	-	103867770	103867849	79	473	845	340	1504	1191	592	0	0	0	2	1	0	LDB1	chr10:103867770-103867849
7984	0.888264	0.0188893	chr10	-	103867950	103868089	139	905	552	647	898	755	761	1	0	0	1	1	1	LDB1	chr10:103867950-103868089
856	1.59865	0.0196292	chr10	+	103899321	103899420	99	198	215	0	117	27	2	0	0	0	0	0	0	PPRC1	chr10:103899321-103899420
856	1.38284	0.0372525	chr10	+	103899981	103900040	59	0	120	119	0	18	105	0	0	0	0	0	0	PPRC1	chr10:103899981-103900040
865	1.05448	0.0108748	chr10	+	104118342	104118481	139	910	925	896	1706	626	240	1	0	0	0	0	0	GBF1	chr10:104118342-104118481
867	1.24738	0.00806231	chr10	+	104135175	104135334	159	767	715	526	611	537	369	1	0	1	0	1	0	GBF1	chr10:104135175-104135334
867	1.8254	0.00941426	chr10	+	104135915	104136014	99	217	51	118	64	0	14	0	0	1	0	0	0	GBF1	chr10:104135915-104136014
867	1.01676	0.00446526	chr10	+	104136335	104136514	179	897	1321	973	1259	1113	760	8	9	6	10	6	6	GBF1	chr10:104136335-104136514
868	0.963534	0.0318893	chr10	+	104139854	104139933	79	159	134	150	246	80	147	1	0	0	0	0	0	GBF1	chr10:104139854-104139933
868	1.82027	0.0108572	chr10	+	104140054	104140333	279	748	1174	639	427	305	303	1	1	1	0	0	0	GBF1	chr10:104140054-104140333
868	1.23631	0.0343855	chr10	+	104140354	104140433	79	673	291	139	771	0	77	2	0	1	2	0	0	GBF1	chr10:104140354-104140433
869	1.13074	0.00501394	chr10	+	104141802	104142221	419	1553	3059	1788	3076	1135	1317	2	2	1	0	0	1	GBF1	chr10:104141802-104142221
876	1.26911	0.0308259	chr10	+	104678560	104678719	159	695	202	279	130	462	236	0	0	1	0	0	0	CNNM2	chr10:104678560-104678719
876	0.720211	0.0314264	chr10	+	104678900	104678979	79	268	359	80	634	239	201	1	1	0	3	0	0	CNNM2	chr10:104678900-104678979
876	0.828114	0.023711	chr10	+	104679480	104679579	99	223	334	333	634	266	233	0	0	0	0	1	0	CNNM2	chr10:104679480-104679579
890	0.767787	0.0216789	chr10	+	105207279	105207338	59	142	289	166	301	303	228	0	0	0	0	0	0	PDCD11	chr10:105207279-105207338
919	1.05894	0.0215223	chr10	+	112258134	112258353	219	279	484	655	711	518	88	1	3	2	0	2	0	DUSP5	chr10:112258134-112258353
919	1.93705	0.0125942	chr10	+	112258494	112258713	219	539	140	261	63	46	57	0	0	0	0	0	0	DUSP5	chr10:112258494-112258713
919	1.05	0.0324807	chr10	+	112258874	112258933	59	104	60	135	60	60	156	0	1	0	0	1	0	DUSP5	chr10:112258874-112258933
8034	0.812337	0.0241727	chr10	-	119133890	119134029	139	463	366	617	948	456	474	0	0	1	1	0	0	PDZD8	chr10:119133890-119134029
8034	2.17236	0.00398926	chr10	-	119134310	119134569	259	697	622	695	212	296	0	0	0	1	0	0	0	PDZD8	chr10:119134310-119134569
8083	1.50799	0.0142218	chr10	-	126370089	126370168	79	73	79	80	0	0	73	0	0	0	0	0	0	FAM53B	chr10:126370089-126370168
8092	1.48308	0.0124491	chr10	-	129923912	129924071	159	356	475	123	264	103	128	3	0	0	0	0	0	MKI67	chr10:129923912-129924071
8092	1.57202	0.00598094	chr10	-	129924292	129924371	79	66	76	0	0	0	3	0	0	0	0	0	0	MKI67	chr10:129924292-129924371
8092	1.65184	0.00527718	chr10	-	129924412	129924591	179	564	502	717	591	0	285	1	1	2	0	0	0	MKI67	chr10:129924412-129924591
8095	2.19652	0.00133784	chr10	-	135106798	135106917	119	145	193	185	0	42	0	0	0	0	0	0	0	TUBGCP2	chr10:135106798-135106917
8095	2.47778	0.000324487	chr10	-	135106998	135107057	59	105	93	60	0	0	0	2	0	0	0	0	0	TUBGCP2	chr10:135106998-135107057
8095	1.57621	0.00959365	chr10	-	135107358	135107417	59	53	141	46	34	0	55	1	0	0	0	0	0	TUBGCP2	chr10:135107358-135107417
8095	1.47083	0.0308138	chr10	-	135107558	135107617	59	59	114	0	0	60	0	0	0	0	0	0	0	TUBGCP2	chr10:135107558-135107617
26735	1.25469	0.00582066	chr11	+	207641	207720	79	294	212	146	246	126	106	5	2	4	4	2	1	RIC8A MIR6743	chr11:207641-207720
26735	1.08844	0.0271866	chr11	+	207841	207920	79	81	301	178	3	435	57	0	0	0	0	0	0	RIC8A MIR6743	chr11:207841-207920
26736	2.26954	0.0154834	chr11	+	209205	209324	119	56	304	122	11	0	0	0	0	0	0	0	0	RIC8A MIR6743	chr11:209205-209324
26736	1.16908	0.0113476	chr11	+	209385	209564	179	538	590	506	1086	189	48	0	0	1	0	0	0	RIC8A MIR6743	chr11:209385-209564
26736	1.07761	0.0236946	chr11	+	209605	209684	79	166	365	197	455	92	115	0	0	1	0	0	0	RIC8A MIR6743	chr11:209605-209684
26736	1.06977	0.0118636	chr11	+	209785	209944	159	873	591	394	911	468	330	0	1	1	1	0	0	RIC8A MIR6743	chr11:209785-209944
26742	1.5234	0.027802	chr11	+	451196	451255	59	60	118	0	55	0	0	0	0	0	0	0	0	PTDSS2	chr11:451196-451255
26742	2.1133	0.00720935	chr11	+	451716	451855	139	258	291	318	12	92	85	0	0	0	0	0	0	PTDSS2	chr11:451716-451855
26743	1.42879	0.00761501	chr11	+	576948	577047	99	261	94	246	60	183	96	1	2	0	0	0	0	PHRF1	chr11:576948-577047
26743	1.77744	0.0150112	chr11	+	578328	578407	79	160	120	55	80	0	8	0	2	0	0	0	0	PHRF1	chr11:578328-578407
26744	0.530334	0.040207	chr11	+	581603	581642	39	345	184	125	570	449	320	0	0	1	2	0	0	PHRF1	chr11:581603-581642
26744	0.610239	0.0367511	chr11	+	581903	582002	99	550	416	208	1305	606	211	1	0	0	0	0	0	PHRF1	chr11:581903-582002
26744	1.66667	0.0150911	chr11	+	582083	582142	59	98	107	0	0	49	2	0	0	0	0	0	0	PHRF1	chr11:582083-582142
26745	1.92147	0.0128878	chr11	+	607084	607203	119	231	100	43	22	0	0	0	0	0	0	0	0	PHRF1	chr11:607084-607203
26745	0.899772	0.0238999	chr11	+	607264	607303	39	119	120	32	221	50	40	0	1	0	2	0	0	PHRF1	chr11:607264-607303
26745	1.05513	0.0127183	chr11	+	607344	607803	459	1574	1613	1503	1621	1115	1652	1	0	3	0	0	0	PHRF1	chr11:607344-607803
26745	1.16373	0.0172414	chr11	+	607884	608123	239	758	663	491	541	493	514	2	1	0	1	0	0	PHRF1	chr11:607884-608123
26745	1.33	0.0294193	chr11	+	608184	608263	79	137	80	75	80	80	0	0	0	0	0	0	0	PHRF1	chr11:608184-608263
26745	1.05747	0.0119928	chr11	+	608424	608983	559	1941	2172	1954	3292	1472	908	4	1	4	1	1	0	PHRF1	chr11:608424-608983
26745	1.59698	0.00577315	chr11	+	609024	609243	219	465	503	801	406	346	109	0	0	0	0	0	0	PHRF1	chr11:609024-609243
26745	1.11472	0.0103661	chr11	+	609304	609603	299	1135	969	1036	1323	685	723	2	1	0	1	0	0	PHRF1	chr11:609304-609603
26745	1.82085	0.00426853	chr11	+	609724	609983	259	440	675	675	323	152	154	2	4	2	2	2	1	PHRF1	chr11:609724-609983
26746	2.75075	0.00619163	chr11	+	610106	610425	319	1010	1179	487	177	0	191	2	4	1	0	0	1	PHRF1	chr11:610106-610425
26746	1.07906	0.00810718	chr11	+	610646	610765	119	435	479	241	411	513	112	0	0	0	1	0	1	PHRF1	chr11:610646-610765
26751	0.851421	0.0173352	chr11	+	810047	810086	39	80	200	259	304	240	110	0	0	0	0	0	0	RPLP2 SNORA52	chr11:810047-810086
26751	0.850433	0.0400877	chr11	+	810387	810466	79	144	224	80	293	85	191	0	0	0	0	0	0	RPLP2 SNORA52	chr11:810387-810466
26753	0.61342	0.0305735	chr11	+	819594	819673	79	393	438	154	1292	351	106	0	0	0	2	0	0	PNPLA2	chr11:819594-819673
26753	1.63007	0.0144553	chr11	+	819954	820153	199	827	1188	264	723	289	156	1	3	0	1	0	1	PNPLA2	chr11:819954-820153
26753	0.899115	0.0208761	chr11	+	820354	820553	199	1614	669	842	1857	1441	273	5	3	1	2	1	0	PNPLA2	chr11:820354-820553
26753	0.931184	0.0382323	chr11	+	820574	820653	79	912	187	592	1064	539	219	1	0	0	3	1	0	PNPLA2	chr11:820574-820653
26753	1.24376	0.0248186	chr11	+	820694	820833	139	426	160	489	454	129	199	0	0	0	0	0	0	PNPLA2	chr11:820694-820833
26753	0.850534	0.0225506	chr11	+	820854	820933	79	283	246	175	449	91	344	2	1	0	0	0	0	PNPLA2	chr11:820854-820933
26753	0.820404	0.0164891	chr11	+	820994	821173	179	768	800	389	1276	496	740	1	3	1	3	0	1	PNPLA2	chr11:820994-821173
26753	0.846285	0.0232149	chr11	+	821274	821353	79	305	269	173	405	231	291	0	1	0	1	0	0	PNPLA2	chr11:821274-821353
26753	1.14524	0.0124037	chr11	+	821534	821653	119	392	250	236	440	191	90	0	0	0	0	0	0	PNPLA2	chr11:821534-821653
26753	0.634609	0.0292098	chr11	+	821774	821893	119	484	561	465	976	943	674	0	1	0	0	0	0	PNPLA2	chr11:821774-821893
26753	1.35958	0.0107255	chr11	+	822074	822193	119	265	135	272	272	67	63	0	0	1	0	0	0	PNPLA2	chr11:822074-822193
26753	0.879071	0.0102284	chr11	+	822394	822593	199	1659	1702	1278	1949	1620	1798	3	2	1	5	0	0	PNPLA2	chr11:822394-822593
26753	1.89941	0.0181411	chr11	+	822674	822813	139	262	545	49	116	140	0	0	2	0	0	0	0	PNPLA2	chr11:822674-822813
26754	2.44228	0.0066205	chr11	+	823595	823854	259	628	1269	1319	502	266	98	2	1	3	0	0	0	PNPLA2	chr11:823595-823854
26754	1.32551	0.0141151	chr11	+	823935	824174	239	524	312	476	368	271	174	0	0	0	0	0	0	PNPLA2	chr11:823935-824174
26755	1.31445	0.00521088	chr11	+	824520	825079	559	4207	4683	2822	4161	3147	1191	17	10	12	14	13	5	PNPLA2	chr11:824520-825079
26755	2.01667	0.000592753	chr11	+	825240	825399	159	157	240	91	0	0	0	0	0	0	0	0	0	PNPLA2	chr11:825240-825399
26756	1.37808	0.0293814	chr11	+	831034	831113	79	152	73	38	0	0	125	0	0	0	0	0	0	CRACR2B CD151	chr11:831034-831113
26756	1.11753	0.0320417	chr11	+	831754	831833	79	67	177	77	81	142	39	0	0	0	0	0	0	CRACR2B CD151	chr11:831754-831833
33063	1.5719	0.00854133	chr11	-	869329	869468	139	161	137	244	178	14	0	0	0	0	0	0	0	CHID1	chr11:869329-869468
33065	1.61143	0.0240084	chr11	-	1326577	1326656	79	53	191	64	35	0	71	1	3	0	0	0	1	TOLLIP	chr11:1326577-1326656
33065	2.01224	0.00910689	chr11	-	1327117	1327276	159	263	537	199	24	0	227	0	0	0	0	0	1	TOLLIP	chr11:1327117-1327276
26757	2.12233	0.00758936	chr11	+	1374450	1374769	319	495	855	271	180	0	78	0	1	0	0	0	0		chr11:1374450-1374769
26757	2.39332	0.011765	chr11	+	1374870	1375049	179	733	391	198	181	50	7	0	0	0	0	0	0		chr11:1374870-1375049
26757	1.82562	0.0127697	chr11	+	1375470	1375609	139	435	188	140	228	0	0	0	0	0	0	0	0		chr11:1375470-1375609
26757	1.81389	0.00308024	chr11	+	1375630	1375749	119	103	117	69	0	0	0	1	0	0	0	0	0		chr11:1375630-1375749
33066	1.79184	0.00479955	chr11	-	1490921	1491000	79	70	129	0	0	5	0	0	0	0	0	0	0	MOB2	chr11:1490921-1491000
33069	1.84929	0.00403269	chr11	-	2246139	2246198	59	856	724	675	349	389	385	5	4	5	5	4	2		chr11:2246139-2246198
26760	1.4941	0.00937398	chr11	+	2398866	2398965	99	245	245	96	100	189	0	0	0	0	0	1	0	CD81	chr11:2398866-2398965
26760	2.08056	0.00659379	chr11	+	2399126	2399405	279	106	561	551	153	0	0	1	0	1	0	0	0	CD81	chr11:2399126-2399405
26760	1.36325	0.000975958	chr11	+	2399446	2399545	99	460	827	357	868	100	146	0	0	0	2	1	0	CD81	chr11:2399446-2399545
26760	1.48245	0.0157335	chr11	+	2399566	2399745	179	1008	303	582	662	312	138	0	1	3	0	0	0	CD81	chr11:2399566-2399745
26760	1.63492	0.00959649	chr11	+	2400026	2400125	99	200	114	309	126	29	104	0	0	1	1	0	1	CD81	chr11:2400026-2400125
26761	1.85942	0.00569252	chr11	+	2417793	2417872	79	149	80	113	73	0	0	0	0	0	0	0	0	CD81	chr11:2417793-2417872
26762	1.6375	0.00125238	chr11	+	2422076	2422155	79	73	0	80	0	0	0	0	0	0	0	0	0	TSSC4	chr11:2422076-2422155
26762	1.50567	0.00739838	chr11	+	2422356	2422495	139	167	350	126	135	53	98	0	0	0	0	0	0	TSSC4	chr11:2422356-2422495
26762	1.60391	0.00934366	chr11	+	2422756	2422855	99	199	389	250	338	61	18	1	2	0	0	0	0	TSSC4	chr11:2422756-2422855
26762	1.31073	0.0138163	chr11	+	2422956	2423015	59	113	116	55	114	0	60	0	0	0	0	0	0	TSSC4	chr11:2422956-2423015
26762	1.58889	0.00275383	chr11	+	2423296	2423355	59	50	56	0	0	0	0	0	0	0	0	0	0	TSSC4	chr11:2423296-2423355
26783	1.79397	0.00867139	chr11	+	6503128	6503187	59	62	115	0	0	19	0	0	0	0	0	0	0	TIMM10B	chr11:6503128-6503187
26786	0.516885	0.0441984	chr11	+	6625525	6625564	39	191	205	234	501	480	346	0	0	0	1	0	0	ILK	chr11:6625525-6625564
26796	0.38599	0.0331575	chr11	+	8707045	8707064	19	1206	1312	1060	3888	3782	3263	56	54	44	2	3	2	RPL27A SNORA45B SNORA45A	chr11:8707045-8707064
26799	1.5303	0.0173922	chr11	+	8718166	8718225	59	73	0	50	0	12	6	0	0	0	0	0	0		chr11:8718166-8718225
26800	2.00172	0.0174685	chr11	+	8815750	8815909	159	220	353	96	0	100	0	0	3	0	0	0	0	LOC102724784	chr11:8815750-8815909
26800	1.50984	0.0118202	chr11	+	8816230	8816329	99	327	174	116	174	36	100	1	0	0	0	0	0	LOC102724784	chr11:8816230-8816329
26800	1.34607	0.0258989	chr11	+	8816370	8816449	79	35	213	146	151	80	0	0	0	0	0	0	0	LOC102724784	chr11:8816370-8816449
33187	1.45855	0.0156931	chr11	-	10829623	10829742	119	132	215	116	102	105	0	0	1	0	0	0	0	EIF4G2	chr11:10829623-10829742
33187	0.978437	0.0348061	chr11	-	10829763	10829802	39	130	35	78	176	71	0	0	0	0	0	1	0	EIF4G2	chr11:10829763-10829802
33193	1.53695	0.0349739	chr11	-	12915339	12915418	79	224	0	160	14	71	81	0	0	0	0	0	0		chr11:12915339-12915418
26832	0.551781	0.0449275	chr11	+	13736159	13736198	39	196	114	236	472	318	297	0	0	0	0	0	0	FAR1	chr11:13736159-13736198
26849	1.52124	0.0162972	chr11	+	19954822	19954881	59	124	32	58	66	0	13	0	0	0	0	0	0	NAV2	chr11:19954822-19954881
26849	1.19373	0.0187724	chr11	+	19955502	19955581	79	178	136	93	165	0	137	0	0	0	0	0	0	NAV2	chr11:19955502-19955581
26849	1.28873	0.0131485	chr11	+	19955642	19955681	39	39	133	74	124	0	40	0	0	0	0	0	0	NAV2	chr11:19955642-19955681
33258	1.07673	0.0332275	chr11	-	27493904	27493963	59	84	112	59	164	56	0	0	0	0	1	0	0	LGR4	chr11:27493904-27493963
33258	1.21928	0.0207726	chr11	-	27493984	27494143	159	329	210	263	471	9	98	1	0	1	0	0	0	LGR4	chr11:27493984-27494143
33258	1.43354	0.0104456	chr11	-	27494324	27494383	59	196	54	235	165	85	31	3	1	5	3	3	1	LGR4	chr11:27494324-27494383
26887	0.512852	0.0265897	chr11	+	34074024	34074123	99	1020	1002	599	2869	1262	1268	2	0	1	1	2	2	CAPRIN1	chr11:34074024-34074123
26887	2.08263	0.0034322	chr11	+	34074204	34074383	179	298	385	0	53	0	0	2	1	0	0	0	0	CAPRIN1	chr11:34074204-34074383
33275	1.33036	0.0131819	chr11	-	34218736	34219075	339	1029	743	619	768	756	28	3	0	1	0	1	0	ABTB2	chr11:34218736-34219075
33276	1.24578	0.0117457	chr11	-	34378257	34378516	259	946	1048	816	581	920	620	0	2	4	0	0	0	ABTB2	chr11:34378257-34378516
33276	1.4587	0.00711872	chr11	-	34378797	34378976	179	338	532	556	583	153	76	2	0	1	1	0	0	ABTB2	chr11:34378797-34378976
33276	1.32946	0.00723446	chr11	-	34378997	34379376	379	2172	1639	2228	2199	902	1159	5	2	1	3	1	2	ABTB2	chr11:34378997-34379376
26927	0.704277	0.0368176	chr11	+	43965175	43965234	59	60	323	203	202	403	310	0	2	0	0	1	0	C11orf96	chr11:43965175-43965234
26927	1.57597	0.00860268	chr11	+	43966135	43966214	79	73	79	54	43	0	0	0	0	0	0	0	0	C11orf96	chr11:43966135-43966214
26927	1.47471	0.0196772	chr11	+	43966275	43966414	139	193	131	152	193	0	0	1	1	0	0	0	0	C11orf96	chr11:43966275-43966414
26927	1.15631	0.0224954	chr11	+	43966495	43966634	139	399	242	204	287	387	0	0	0	0	0	0	0	C11orf96	chr11:43966495-43966634
26931	0.632803	0.0203716	chr11	+	45891254	45891333	79	639	417	328	1399	604	332	1	0	1	1	0	0	CRY2	chr11:45891254-45891333
26932	0.645577	0.0320884	chr11	+	45891997	45892076	79	197	348	317	597	560	306	0	0	0	0	1	0	CRY2	chr11:45891997-45892076
26933	0.765351	0.0161868	chr11	+	45902502	45902581	79	483	294	375	873	508	199	0	0	1	0	1	0	CRY2	chr11:45902502-45902581
26934	1.22189	0.00943873	chr11	+	46401658	46401737	79	223	293	66	144	134	154	0	1	0	1	0	0	DGKZ MDK	chr11:46401658-46401737
26934	0.973747	0.0386678	chr11	+	46401918	46402017	99	140	266	110	406	64	68	0	0	0	0	0	0	DGKZ MDK	chr11:46401918-46402017
33300	1.8066	0.00271498	chr11	-	47199913	47199972	59	93	53	57	3	0	29	0	0	0	0	0	0	ARFGAP2 PACSIN3 MIR6745	chr11:47199913-47199972
33301	0.582171	0.0275347	chr11	-	47205904	47205963	59	341	458	178	539	527	714	1	2	0	3	4	5	PACSIN3	chr11:47205904-47205963
33318	0.815868	0.0222068	chr11	-	47857284	47857363	79	163	249	422	432	265	395	0	2	2	1	0	0	NUP160	chr11:47857284-47857363
33326	1.32513	0.0082555	chr11	-	57080237	57080376	139	293	516	267	354	244	112	0	3	0	2	0	0	TNKS1BP1	chr11:57080237-57080376
33332	0.534991	0.0307246	chr11	-	57100926	57101005	79	642	514	450	1502	735	973	1	0	0	1	0	1	SSRP1	chr11:57100926-57101005
33334	0.490628	0.0290236	chr11	-	57102560	57102679	119	1025	1378	1109	2799	3176	1570	4	1	2	3	6	2	SSRP1	chr11:57102560-57102679
26946	1.48187	0.0166173	chr11	+	57440342	57440401	59	60	46	0	0	0	13	0	0	0	0	0	0	ZDHHC5	chr11:57440342-57440401
33354	1.37788	0.025809	chr11	-	61070245	61070304	59	48	71	0	0	37	0	0	0	0	0	0	0	DDB1	chr11:61070245-61070304
26979	0.46813	0.0226414	chr11	+	61891526	61891625	99	1300	2131	924	4456	2980	2210	1	2	1	5	1	2	INCENP	chr11:61891526-61891625
26980	1.24158	0.0083841	chr11	+	61895681	61895840	159	460	1218	374	697	491	373	0	3	0	2	0	0	INCENP	chr11:61895681-61895840
26980	1.44675	0.00532894	chr11	+	61896081	61896320	239	836	963	687	541	254	701	0	0	0	0	0	0	INCENP	chr11:61896081-61896320
26981	0.719661	0.0146041	chr11	+	61897245	61897344	99	552	643	452	1417	477	513	0	0	1	0	0	1	INCENP	chr11:61897245-61897344
26981	0.575064	0.0272111	chr11	+	61897385	61897464	79	548	476	306	1641	537	317	2	0	1	2	0	2	INCENP	chr11:61897385-61897464
26981	0.895382	0.00792637	chr11	+	61897665	61898044	379	2895	3042	2488	4535	2920	2128	7	3	8	10	0	0	INCENP	chr11:61897665-61898044
26982	1.11517	0.0317315	chr11	+	61919237	61919296	59	42	73	102	61	115	0	0	0	0	0	0	0	INCENP	chr11:61919237-61919296
33373	0.734767	0.00693645	chr11	-	62303415	62303514	99	892	1020	835	2209	966	686	3	3	1	2	3	1	AHNAK	chr11:62303415-62303514
33382	0.736313	0.0271871	chr11	-	62369075	62369174	99	402	278	338	678	562	250	0	0	0	0	0	0	MTA2 EML3	chr11:62369075-62369174
33382	1.32432	0.0309269	chr11	-	62369435	62369494	59	60	72	31	19	60	0	0	0	0	0	0	0	MTA2 EML3	chr11:62369435-62369494
33382	1.61667	0.00167381	chr11	-	62369515	62369574	59	0	57	54	0	0	0	0	0	0	0	0	0	MTA2 EML3	chr11:62369515-62369574
26989	0.535118	0.040018	chr11	+	62433234	62433313	79	1890	843	764	2856	2537	1352	14	3	3	13	20	4	SNORA57 METTL12	chr11:62433234-62433313
26989	0.748842	0.015142	chr11	+	62433834	62433953	119	701	790	573	1587	572	702	0	0	0	2	0	2	SNORA57 METTL12	chr11:62433834-62433953
26989	0.834348	0.0139563	chr11	+	62433974	62434433	459	2911	2752	2240	5086	2791	1873	0	4	6	6	2	3	SNORA57 METTL12	chr11:62433974-62434433
26989	1.08962	0.0239878	chr11	+	62434474	62434513	39	470	156	170	339	268	121	1	1	0	0	0	0	SNORA57 METTL12	chr11:62434474-62434513
26991	0.646414	0.0351164	chr11	+	62437158	62437257	99	249	411	451	632	577	676	0	0	1	1	0	0	UQCC3	chr11:62437158-62437257
26991	1.04204	0.0326688	chr11	+	62437298	62437457	159	197	470	460	610	354	94	0	1	0	1	1	0	UQCC3	chr11:62437298-62437457
26992	0.969671	0.00789692	chr11	+	62439422	62439601	179	883	941	1013	1712	701	542	1	1	1	0	0	0	UQCC3	chr11:62439422-62439601
26992	1.77105	0.0116764	chr11	+	62439842	62439981	139	467	263	188	142	91	107	2	0	0	0	0	0	UQCC3	chr11:62439842-62439981
33406	0.673389	0.0154867	chr11	-	62494092	62494251	159	1050	1309	877	1778	1611	1681	4	1	1	1	0	0	HNRNPUL2-BSCL2 HNRNPUL2	chr11:62494092-62494251
33406	1.60276	0.0129712	chr11	-	62494352	62494471	119	293	254	134	166	93	33	0	1	0	0	0	0	HNRNPUL2-BSCL2 HNRNPUL2	chr11:62494352-62494471
33407	1.41495	0.0145717	chr11	-	62520073	62520152	79	152	73	80	0	148	0	0	0	1	0	0	0	ZBTB3	chr11:62520073-62520152
33407	1.51572	0.00511389	chr11	-	62520653	62520732	79	157	158	160	79	0	158	0	0	2	0	0	0	ZBTB3	chr11:62520653-62520732
33408	1.09502	0.0239082	chr11	-	62554132	62554191	59	116	120	60	116	78	60	0	2	0	2	0	0		chr11:62554132-62554191
33409	0.926199	0.0277103	chr11	-	62554820	62554899	79	156	148	205	205	217	151	0	0	1	0	0	0		chr11:62554820-62554899
33409	1.55046	0.0127413	chr11	-	62555000	62555079	79	68	80	119	87	0	0	0	0	0	0	0	0		chr11:62555000-62555079
33410	1.43172	0.00888394	chr11	-	62559474	62559593	119	156	220	235	228	79	14	1	0	0	0	0	0	NXF1 TMEM223 MIR6514	chr11:62559474-62559593
33410	0.385668	0.0379558	chr11	-	62559694	62559753	59	1982	2674	1905	5073	7115	5141	0	1	5	1	3	4	NXF1 TMEM223 MIR6514	chr11:62559694-62559753
33411	0.603972	0.0145693	chr11	-	62561726	62561885	159	2479	3046	2386	6041	4686	2711	3	4	1	5	2	0	NXF1 MIR6514	chr11:62561726-62561885
33411	0.790076	0.00953689	chr11	-	62562406	62562485	79	498	497	612	706	967	441	0	2	2	0	1	0	NXF1	chr11:62562406-62562485
33411	0.612747	0.0236095	chr11	-	62563546	62563645	99	541	774	392	1725	729	533	0	2	1	1	0	1	NXF1	chr11:62563546-62563645
33411	0.686235	0.0223281	chr11	-	62563946	62564025	79	257	630	225	499	549	688	0	1	0	0	0	0	NXF1	chr11:62563946-62564025
33411	0.841765	0.0212283	chr11	-	62564806	62564865	59	145	315	142	226	369	154	0	0	0	0	0	0	NXF1	chr11:62564806-62564865
33412	2.33939	0.0373132	chr11	-	62566289	62566328	39	185	73	0	3	0	42	2	0	0	0	0	0	NXF1	chr11:62566289-62566328
33412	0.746319	0.0449078	chr11	-	62566749	62566808	59	255	147	77	396	203	104	0	0	0	0	0	0	NXF1	chr11:62566749-62566808
33412	0.841549	0.0299654	chr11	-	62566889	62566928	39	187	57	114	213	90	145	0	0	0	0	0	0	NXF1	chr11:62566889-62566928
33412	0.94382	0.0244616	chr11	-	62566949	62567048	99	459	213	204	577	298	67	0	0	0	1	0	0	NXF1	chr11:62566949-62567048
33412	0.844741	0.0254402	chr11	-	62567149	62567248	99	234	695	281	1002	129	362	0	0	2	1	0	0	NXF1	chr11:62567149-62567248
33412	0.659357	0.0294396	chr11	-	62567869	62567928	59	216	219	287	499	406	283	0	0	0	0	0	0	NXF1	chr11:62567869-62567928
33413	0.705836	0.0103871	chr11	-	62568582	62568661	79	514	729	307	1053	793	463	1	1	1	1	0	0	NXF1	chr11:62568582-62568661
33413	0.512821	0.0403469	chr11	-	62568802	62568861	59	369	364	303	922	824	449	1	0	0	1	0	0	NXF1	chr11:62568802-62568861
33413	1.03976	0.00851993	chr11	-	62569422	62569501	79	344	428	684	595	412	388	0	0	1	0	0	0	NXF1	chr11:62569422-62569501
33414	0.541169	0.0199521	chr11	-	62572811	62572930	119	1198	1784	1001	3613	2084	1975	1	1	0	2	0	0	NXF1 STX5	chr11:62572811-62572930
33414	1.71078	0.00619042	chr11	-	62572971	62573310	339	784	1139	726	408	259	474	3	3	1	0	0	0	NXF1 STX5	chr11:62572971-62573310
33415	1.26186	0.0119395	chr11	-	62573648	62573727	79	238	160	80	66	149	114	0	0	0	0	0	0	NXF1 STX5	chr11:62573648-62573727
33415	1.02358	0.0132147	chr11	-	62574088	62574247	159	663	584	388	663	722	213	2	1	0	0	0	0	NXF1 STX5	chr11:62574088-62574247
33415	0.700157	0.0359153	chr11	-	62574628	62574667	39	147	114	61	231	187	99	0	1	0	0	0	0	NXF1 STX5	chr11:62574628-62574667
33415	0.614799	0.0256578	chr11	-	62574848	62574907	59	253	343	350	779	459	420	0	0	1	0	0	0	NXF1 STX5	chr11:62574848-62574907
33421	0.779822	0.00850004	chr11	-	62591599	62591718	119	725	1116	500	1582	592	937	1	2	0	2	0	0	STX5	chr11:62591599-62591718
33423	1.24787	0.0112212	chr11	-	62598413	62598512	99	212	195	316	108	44	367	0	0	1	1	0	0	WDR74 STX5	chr11:62598413-62598512
33423	0.786087	0.0414191	chr11	-	62598673	62598752	79	182	182	300	521	278	107	0	0	0	0	1	0	WDR74 STX5	chr11:62598673-62598752
33423	1.32976	0.0189069	chr11	-	62599133	62599192	59	69	67	180	25	81	83	0	0	0	0	0	1	WDR74 STX5	chr11:62599133-62599192
33423	1.08571	0.0371687	chr11	-	62599253	62599312	59	60	120	240	256	60	60	1	0	1	1	0	0	WDR74 STX5	chr11:62599253-62599312
33424	1.83142	0.0151259	chr11	-	62599859	62599898	39	226	66	66	0	61	80	0	0	0	0	0	0	WDR74 STX5	chr11:62599859-62599898
33424	1.06027	0.0258349	chr11	-	62600099	62600158	59	58	179	58	3	205	60	0	0	0	0	0	0	WDR74 STX5	chr11:62600099-62600158
26998	1.02198	0.0310501	chr11	+	62600259	62600298	39	26	106	120	80	120	44	0	0	0	0	0	0		chr11:62600259-62600298
33424	0.913839	0.0128527	chr11	-	62602759	62603038	279	1404	1749	1790	2640	1546	1303	0	1	1	1	0	1	WDR74	chr11:62602759-62603038
33424	0.568809	0.0198092	chr11	-	62603159	62603258	99	1280	1295	440	1814	2079	1630	1	0	0	1	1	1	WDR74	chr11:62603159-62603258
33426	1.05186	0.00303159	chr11	-	62606494	62606693	199	1196	1140	1214	2080	629	659	1	4	2	0	1	0	WDR74	chr11:62606494-62606693
33426	1.12229	0.00107541	chr11	-	62606754	62607073	319	3043	5414	3004	6015	2204	1943	12	13	6	11	2	1	WDR74	chr11:62606754-62607073
33436	0.722604	0.0206954	chr11	-	63952573	63952892	319	2085	2519	2488	3237	4011	2971	5	3	5	4	2	3		chr11:63952573-63952892
33439	0.937853	0.0386714	chr11	-	64036396	64036455	59	158	55	101	104	149	98	1	0	0	0	0	0	BAD	chr11:64036396-64036455
33440	1.43333	0.0239375	chr11	-	64037169	64037268	99	149	169	23	54	96	0	0	1	0	0	0	0	BAD	chr11:64037169-64037268
33440	1.29605	0.0241878	chr11	-	64037889	64037948	59	60	60	94	112	12	0	0	0	0	0	0	0	BAD	chr11:64037889-64037948
33441	0.455764	0.0401704	chr11	-	64039197	64039236	39	269	429	202	1493	372	245	0	0	0	2	0	0	BAD	chr11:64039197-64039236
33444	1.28643	0.0226215	chr11	-	64533498	64533637	139	150	288	166	205	0	171	0	0	0	0	0	0	SF1	chr11:64533498-64533637
33445	0.758036	0.0264389	chr11	-	64535112	64535171	59	321	226	114	284	218	430	0	1	1	0	1	1	SF1	chr11:64535112-64535171
33445	0.940231	0.00954305	chr11	-	64535572	64535691	119	526	744	647	958	713	395	0	1	0	0	0	0	SF1	chr11:64535572-64535691
33448	0.619424	0.0132213	chr11	-	64543983	64544062	79	870	805	507	1438	1362	879	1	1	0	1	0	0	SF1	chr11:64543983-64544062
33451	0.689873	0.0313613	chr11	-	64621206	64621265	59	120	266	189	324	473	105	0	1	1	3	3	0	EHD1	chr11:64621206-64621265
33452	0.688963	0.0351583	chr11	-	64621781	64621860	79	169	395	190	877	120	190	2	4	3	11	1	5	EHD1	chr11:64621781-64621860
33452	0.841748	0.0270466	chr11	-	64621941	64622040	99	335	327	155	464	294	269	0	0	0	0	0	0	EHD1	chr11:64621941-64622040
33452	0.893424	0.028256	chr11	-	64622101	64622140	39	120	39	115	204	104	13	0	0	0	0	0	0	EHD1	chr11:64622101-64622140
33452	1.16467	0.0361091	chr11	-	64622881	64622940	59	90	59	60	39	60	55	0	0	0	0	0	0	EHD1	chr11:64622881-64622940
33453	1.11611	0.00651193	chr11	-	64627533	64627692	159	533	924	579	1103	554	120	1	2	0	1	1	0	EHD1	chr11:64627533-64627692
33454	0.93253	0.0276498	chr11	-	64643603	64643642	39	40	125	102	121	103	71	0	0	0	0	0	0	EHD1	chr11:64643603-64643642
33454	1.39567	0.0211368	chr11	-	64643783	64643902	119	617	206	235	105	304	243	0	0	0	0	1	0	EHD1	chr11:64643783-64643902
33454	1.49178	0.00808057	chr11	-	64644203	64644342	139	387	690	483	305	388	221	1	3	0	1	0	0	EHD1	chr11:64644203-64644342
33454	1.53681	0.0155833	chr11	-	64644363	64644562	199	687	441	236	366	189	125	6	4	0	4	1	1	EHD1	chr11:64644363-64644562
33454	1.26135	0.00770798	chr11	-	64644583	64645082	499	1712	1275	1452	1395	817	1005	1	4	4	3	1	1	EHD1	chr11:64644583-64645082
33454	1.97295	0.00890238	chr11	-	64645143	64645382	239	617	327	500	221	33	135	1	4	1	0	0	0	EHD1	chr11:64645143-64645382
33454	1.31939	0.00450364	chr11	-	64645403	64645922	519	3590	4010	2861	3604	1914	2000	8	9	13	11	10	10	EHD1	chr11:64645403-64645922
33455	1.85485	0.00572005	chr11	-	64673807	64674026	219	419	520	472	339	88	32	1	1	1	1	0	0	ATG2A	chr11:64673807-64674026
33455	2.17517	0.00677569	chr11	-	64674127	64674486	359	716	508	921	385	2	23	4	0	0	0	0	0	ATG2A	chr11:64674127-64674486
33455	2.15858	0.00632749	chr11	-	64674647	64674966	319	851	601	742	367	113	23	0	0	1	0	0	0	ATG2A	chr11:64674647-64674966
33456	2.073	0.00925478	chr11	-	64678535	64678994	459	1423	884	1011	374	2	518	2	1	1	0	0	0	ATG2A	chr11:64678535-64678994
33456	1.1614	0.0182309	chr11	-	64679155	64679234	79	234	156	68	102	19	236	0	0	0	0	0	1	ATG2A	chr11:64679155-64679234
33456	2.13324	0.00616145	chr11	-	64679275	64679754	479	1283	988	876	427	210	77	0	2	0	0	0	0	ATG2A	chr11:64679275-64679754
33457	1.9134	0.00786652	chr11	-	64681220	64681699	479	2052	1924	702	1404	262	104	2	4	0	0	0	0	ATG2A	chr11:64681220-64681699
33457	1.70549	0.01397	chr11	-	64681820	64681959	139	352	84	414	323	0	0	1	0	0	1	0	0	ATG2A	chr11:64681820-64681959
33458	0.771405	0.0156132	chr11	-	64684482	64684541	59	128	383	233	283	313	427	0	0	1	0	0	0	ATG2A	chr11:64684482-64684541
27030	0.569286	0.038399	chr11	+	64811961	64812020	59	296	302	167	674	481	332	0	0	1	0	0	0	SAC3D1	chr11:64811961-64812020
27034	1.54458	0.0212278	chr11	+	64880133	64880352	219	419	248	284	206	18	159	0	0	0	0	0	0	TM7SF2 VPS51	chr11:64880133-64880352
33461	0.960139	0.024823	chr11	-	64883751	64883810	59	150	165	59	169	174	54	0	0	0	0	0	0	ZNHIT2	chr11:64883751-64883810
33461	2.6503	0.00591411	chr11	-	64884131	64884290	159	1534	869	663	496	305	59	3	0	1	1	0	0	ZNHIT2	chr11:64884131-64884290
33461	2.41939	0.00368432	chr11	-	64884391	64884690	299	339	410	777	111	0	0	0	1	4	0	0	0	ZNHIT2	chr11:64884391-64884690
33461	1.55901	0.00638999	chr11	-	64884871	64885010	139	317	410	549	470	135	68	0	0	2	0	0	0	ZNHIT2	chr11:64884871-64885010
33461	0.834375	0.0406638	chr11	-	64885051	64885110	59	114	138	94	116	125	219	1	1	0	0	0	0	ZNHIT2	chr11:64885051-64885110
33461	1.64856	0.0135368	chr11	-	64885171	64885250	79	116	80	80	65	8	0	0	0	0	0	0	0	ZNHIT2	chr11:64885171-64885250
33462	0.5	0.0464634	chr11	-	64888283	64888302	19	92	142	62	259	224	161	0	0	0	1	1	0	FAU	chr11:64888283-64888302
33462	0.593151	0.0244354	chr11	-	64888943	64888962	19	154	89	126	243	218	205	0	0	1	1	0	0	FAU	chr11:64888943-64888962
33462	0.741959	0.0268314	chr11	-	64889203	64889282	79	312	274	204	702	104	345	0	0	2	2	0	0	FAU	chr11:64889203-64889282
33462	0.755444	0.0121689	chr11	-	64889323	64889522	199	2573	1716	1266	3097	2501	1964	3	2	0	2	1	0	FAU	chr11:64889323-64889522
33463	0.929934	0.0200486	chr11	-	64895286	64895465	179	332	686	677	508	600	760	1	0	1	0	1	0	SYVN1	chr11:64895286-64895465
33463	0.914073	0.0297328	chr11	-	64895486	64895645	159	187	706	587	558	856	251	0	2	0	2	0	0	SYVN1 MIR6751	chr11:64895486-64895645
33463	1.47066	0.0113471	chr11	-	64895706	64895845	139	217	421	137	112	161	125	2	0	0	0	0	0	SYVN1 MIR6751	chr11:64895706-64895845
33463	1.63143	0.0153187	chr11	-	64895946	64896025	79	57	117	145	110	0	0	0	1	2	0	0	0	SYVN1 MIR6751	chr11:64895946-64896025
33463	0.975258	0.0331079	chr11	-	64897286	64897345	59	60	180	53	195	0	110	0	0	0	0	0	0	SYVN1 MIR6751	chr11:64897286-64897345
33463	1.48649	0.0311987	chr11	-	64897466	64897565	99	203	249	6	218	0	0	3	0	0	0	0	0	SYVN1 MIR6751	chr11:64897466-64897565
33463	1.88441	0.00346238	chr11	-	64897586	64897685	99	129	88	184	72	0	0	0	0	0	0	0	0	SYVN1 MIR6751	chr11:64897586-64897685
33464	1.17438	0.0156131	chr11	-	64899776	64899895	119	229	375	228	306	233	116	0	0	0	0	0	0	SYVN1	chr11:64899776-64899895
33464	0.89899	0.0403363	chr11	-	64899956	64899995	39	64	81	180	221	80	70	0	0	0	0	1	0	SYVN1	chr11:64899956-64899995
33464	1.30603	0.0113044	chr11	-	64900056	64900255	199	978	1003	783	732	479	777	1	1	2	0	0	0	SYVN1	chr11:64900056-64900255
33465	0.927888	0.00901076	chr11	-	64900990	64901069	79	507	200	503	443	340	536	0	1	0	0	1	1	SYVN1	chr11:64900990-64901069
27040	0.482093	0.0208825	chr11	+	65190841	65190960	119	2170	3460	2460	6345	5249	5605	2	6	3	3	3	9	NEAT1	chr11:65190841-65190960
27040	0.697561	0.0111723	chr11	+	65191121	65191180	59	505	413	463	816	768	491	1	1	1	0	0	0	NEAT1	chr11:65191121-65191180
27040	0.472639	0.0466955	chr11	+	65191501	65191540	39	352	171	329	732	604	609	1	0	0	0	0	0	NEAT1	chr11:65191501-65191540
27041	0.731586	0.0151082	chr11	+	65212158	65212277	119	521	964	487	1491	1007	334	1	2	0	2	1	0	MIR612	chr11:65212158-65212277
27044	1.1384	0.0188026	chr11	+	65233425	65233484	59	163	195	46	130	203	0	0	0	0	0	0	0		chr11:65233425-65233484
27045	0.353952	0.0423106	chr11	+	65268033	65268052	19	6404	8626	6409	18884	21459	20380	1	3	3	4	2	3	MALAT1	chr11:65268033-65268052
27046	1.38144	0.0161531	chr11	+	65338339	65338418	79	78	158	194	163	82	0	0	0	0	0	0	0	SSSCA1 FAM89B	chr11:65338339-65338418
27046	1.09366	0.0180157	chr11	+	65339939	65339978	39	144	77	40	216	4	23	1	1	2	0	0	0	SSSCA1 FAM89B	chr11:65339939-65339978
27047	0.879482	0.0250358	chr11	+	65340841	65340920	79	318	169	156	446	195	123	0	0	0	0	0	0	SSSCA1 FAM89B	chr11:65340841-65340920
27050	1.22698	0.0202071	chr11	+	65385435	65385594	159	167	340	359	243	182	192	0	0	0	0	0	0	PCNXL3	chr11:65385435-65385594
27050	1.77198	0.00400626	chr11	+	65385655	65385754	99	157	90	94	0	64	0	1	0	0	0	0	0	PCNXL3	chr11:65385655-65385754
27050	2.0988	0.0093188	chr11	+	65386015	65386114	99	262	192	117	57	58	0	0	0	0	0	0	0	PCNXL3	chr11:65386015-65386114
27052	1.68095	0.00447419	chr11	+	65629588	65629727	139	77	118	91	0	0	0	0	0	0	0	0	0	MUS81	chr11:65629588-65629727
27052	1.32824	0.0293679	chr11	+	65630308	65630367	59	54	54	60	52	24	6	0	0	0	0	0	0	MUS81	chr11:65630308-65630367
27053	1.39348	0.0111438	chr11	+	65631202	65631401	199	485	745	463	487	347	207	1	3	0	1	3	0	MUS81	chr11:65631202-65631401
27053	1.16264	0.0478341	chr11	+	65631962	65632041	79	123	148	18	80	0	135	0	0	0	0	0	0	MUS81	chr11:65631962-65632041
27053	1.39604	0.0371795	chr11	+	65632422	65632501	79	0	160	160	160	0	4	0	1	0	0	0	0	MUS81	chr11:65632422-65632501
33473	1.55133	0.0126597	chr11	-	65652945	65653004	59	108	60	60	21	11	51	0	0	0	0	0	0	FIBP	chr11:65652945-65653004
33474	0.64272	0.0246829	chr11	-	65655135	65655174	39	120	264	167	365	351	200	0	0	0	0	1	1	FIBP	chr11:65655135-65655174
33474	0.518156	0.0424893	chr11	-	65655495	65655514	19	100	111	92	356	160	140	1	0	1	0	0	0	FIBP	chr11:65655495-65655514
27054	0.962329	0.0101255	chr11	+	65658638	65658697	59	144	275	240	179	345	168	0	0	1	0	0	1	CCDC85B	chr11:65658638-65658697
27057	0.577818	0.0367371	chr11	+	65729258	65729297	39	92	282	152	292	421	281	0	0	0	1	0	0	TSGA10IP SART1	chr11:65729258-65729297
27060	0.478428	0.0381316	chr11	+	65822762	65822781	19	181	158	100	550	205	228	0	0	0	0	0	0	SF3B2	chr11:65822762-65822781
33478	1.29713	0.0163494	chr11	-	66105205	66105284	79	101	212	80	158	90	0	0	0	0	0	0	0	BRMS1 RIN1	chr11:66105205-66105284
27076	0.872378	0.0199611	chr11	+	66384466	66384545	79	363	261	130	487	226	187	1	0	0	1	0	0	RBM14 RBM14-RBM4	chr11:66384466-66384545
27076	1.33467	0.0114997	chr11	+	66384786	66384885	99	198	161	338	356	89	2	0	0	0	0	0	0	RBM14 RBM14-RBM4	chr11:66384786-66384885
27078	0.475433	0.0341182	chr11	+	66391846	66391925	79	822	709	607	2492	1091	1196	1	1	1	0	1	1	RBM14 RBM14-RBM4	chr11:66391846-66391925
27092	1.07274	0.0216526	chr11	+	67022572	67022811	239	582	945	421	1186	312	276	0	2	2	2	0	0	KDM2A	chr11:67022572-67022811
27093	1.95033	0.00612814	chr11	+	67159187	67159386	199	295	139	140	4	0	0	0	1	0	0	0	0	LOC100130987 RAD9A	chr11:67159187-67159386
27094	0.785882	0.0337218	chr11	+	67164973	67165032	59	267	120	101	363	249	58	0	0	0	0	0	0	RAD9A	chr11:67164973-67165032
27094	0.972516	0.0339226	chr11	+	67165213	67165252	39	197	106	37	104	127	122	0	0	0	0	0	0	RAD9A	chr11:67165213-67165252
33486	1.31504	0.029493	chr11	-	67186139	67186238	99	172	71	100	89	20	83	0	1	0	0	0	0		chr11:67186139-67186238
33486	1.36364	0.0245039	chr11	-	67186359	67186438	79	80	80	80	32	80	0	0	0	0	0	0	0		chr11:67186359-67186438
33486	1.58726	0.0125725	chr11	-	67187039	67187138	99	95	203	71	124	0	0	0	1	0	0	0	0		chr11:67187039-67187138
33486	2.04178	0.00458942	chr11	-	67187179	67187478	299	888	674	507	292	153	111	1	1	1	0	0	1		chr11:67187179-67187478
33486	1.20155	0.0226735	chr11	-	67187599	67187738	139	482	204	285	439	157	145	1	0	0	0	0	0		chr11:67187599-67187738
33486	2.59317	0.00585859	chr11	-	67187999	67188078	79	80	146	369	0	13	61	0	0	0	0	0	2		chr11:67187999-67188078
33488	0.714286	0.04749	chr11	-	67274082	67274121	39	116	40	140	124	197	147	1	0	0	0	0	0	PITPNM1 CDK2AP2	chr11:67274082-67274121
33488	1.8509	0.00199117	chr11	-	67274202	67274301	99	248	259	406	218	133	13	1	2	1	0	0	0	PITPNM1 CDK2AP2	chr11:67274202-67274301
33488	1.04179	0.0189349	chr11	-	67274382	67274481	99	163	289	337	292	244	217	0	1	1	0	0	0	PITPNM1 CDK2AP2	chr11:67274382-67274481
33488	0.639801	0.0259194	chr11	-	67274742	67274821	79	425	452	161	687	726	353	2	0	0	0	1	0	PITPNM1 CDK2AP2	chr11:67274742-67274821
33488	1.61439	0.00979835	chr11	-	67274962	67275081	119	135	221	151	120	58	0	1	1	0	1	0	0	CDK2AP2	chr11:67274962-67275081
33488	0.835443	0.0210695	chr11	-	67275262	67275381	119	451	540	163	1054	254	141	0	0	1	2	0	0	CDK2AP2	chr11:67275262-67275381
27099	1.14491	0.0211073	chr11	+	67374638	67374737	99	100	194	196	237	160	0	0	2	0	0	0	0	NDUFV1	chr11:67374638-67374737
27107	0.997436	0.0114934	chr11	+	67394688	67394807	119	352	351	493	791	80	329	0	0	0	0	0	0		chr11:67394688-67394807
27114	0.648308	0.0249999	chr11	+	70117650	70117749	99	489	627	232	390	1260	588	0	0	0	0	0	1	PPFIA1	chr11:70117650-70117749
27115	0.729154	0.0253904	chr11	+	70118441	70118520	79	255	533	135	516	468	367	0	0	0	0	1	0	PPFIA1	chr11:70118441-70118520
27119	0.586426	0.0479171	chr11	+	71701680	71701719	39	212	72	133	426	237	160	2	2	0	0	0	0	RNF121	chr11:71701680-71701719
33498	0.769319	0.030568	chr11	-	71724199	71724258	59	156	218	113	351	170	166	0	0	0	0	0	0	NUMA1	chr11:71724199-71724258
33498	0.800513	0.0352064	chr11	-	71725399	71725498	99	203	278	467	560	335	364	0	0	0	0	0	0	NUMA1	chr11:71725399-71725498
33498	0.61158	0.0408138	chr11	-	71727179	71727218	39	80	227	80	364	302	43	0	0	0	0	0	0	NUMA1	chr11:71727179-71727218
27120	1.73379	0.0109633	chr11	+	73088578	73088717	139	93	287	216	88	78	0	0	0	0	0	0	0	RELT	chr11:73088578-73088717
33502	1.55833	0.0362166	chr11	-	73117706	73117765	59	0	138	56	0	60	0	0	0	0	0	0	0	FAM168A	chr11:73117706-73117765
33505	1.45946	0.0307811	chr11	-	73679166	73679225	59	107	87	0	0	79	0	1	0	0	0	0	0		chr11:73679166-73679225
27138	0.735336	0.0403098	chr11	+	75110680	75110719	39	175	158	61	167	92	320	0	0	0	0	0	0	SNORD15A RPS3	chr11:75110680-75110719
27138	1.18515	0.0089168	chr11	+	75110740	75110919	179	1478	728	797	1253	384	822	2	1	1	1	0	0	SNORD15A RPS3	chr11:75110740-75110919
27138	0.67505	0.0422319	chr11	+	75111060	75111119	59	234	198	59	306	240	264	0	0	0	1	0	0	SNORD15A RPS3	chr11:75111060-75111119
27150	0.443189	0.0353534	chr11	+	82868339	82868418	79	642	1154	752	3208	1234	1642	3	6	0	6	3	3	PCF11	chr11:82868339-82868418
33547	1.51707	0.0224692	chr11	-	82997445	82997504	59	0	83	44	0	25	0	0	0	1	0	0	0	CCDC90B	chr11:82997445-82997504
33701	0.51758	0.0310462	chr11	-	85338735	85338814	79	441	829	484	1029	955	1624	1	1	0	0	1	4	DLG2	chr11:85338735-85338814
33701	0.800078	0.0185546	chr11	-	85339135	85339234	99	790	403	544	892	717	639	0	2	0	1	1	0	DLG2	chr11:85339135-85339234
33711	1.69534	0.0028648	chr11	-	85374893	85375432	539	4102	5569	4486	3680	1808	2218	8	4	10	5	1	2	CREBZF	chr11:85374893-85375432
33711	1.041	0.0125872	chr11	-	85375473	85376012	539	2622	4113	4056	6999	2127	1233	4	6	10	4	0	1	CREBZF	chr11:85375473-85376012
27218	0.936773	0.0206233	chr11	+	108093977	108094076	99	235	473	273	436	356	284	0	2	0	0	0	0	ATM	chr11:108093977-108094076
33807	0.724273	0.0212599	chr11	-	118558822	118558941	119	533	438	489	1393	229	532	2	4	0	7	1	0		chr11:118558822-118558941
33812	0.632803	0.0368323	chr11	-	118888762	118888801	39	56	173	168	161	363	169	0	0	0	1	0	0	RPS25	chr11:118888762-118888801
33814	1.63366	0.00517225	chr11	-	118900414	118900473	59	66	59	21	0	7	15	1	0	0	0	0	0	SLC37A4	chr11:118900414-118900473
33820	0.617021	0.0326801	chr11	-	118923462	118923541	79	411	371	217	768	797	212	0	1	1	0	0	1	HYOU1	chr11:118923462-118923541
33822	1.52842	0.00422786	chr11	-	118962757	118962896	139	465	395	613	361	181	287	0	4	0	0	0	0	H2AFX	chr11:118962757-118962896
33822	1.64719	0.00441328	chr11	-	118962997	118963276	279	991	1157	725	690	164	565	0	2	0	0	0	0	H2AFX	chr11:118962997-118963276
33822	0.989441	0.0159347	chr11	-	118963357	118963476	119	435	269	529	651	235	360	0	0	0	0	0	1	H2AFX	chr11:118963357-118963476
33822	1.27927	0.0113566	chr11	-	118963577	118963676	99	235	177	329	162	270	88	1	0	1	0	0	0	H2AFX	chr11:118963577-118963676
33822	0.749771	0.0296701	chr11	-	118963717	118963896	179	646	453	810	1138	1173	414	0	0	2	0	3	0	H2AFX	chr11:118963717-118963896
33822	0.856045	0.0203746	chr11	-	118964017	118964216	199	1429	1118	512	1298	1550	845	1	3	0	0	0	0	H2AFX	chr11:118964017-118964216
33822	0.531812	0.0393066	chr11	-	118964237	118964276	39	176	213	256	503	457	366	0	1	0	0	0	0	H2AFX	chr11:118964237-118964276
33822	0.845194	0.0223571	chr11	-	118964417	118964476	59	129	230	134	297	121	203	1	0	0	0	0	0	H2AFX	chr11:118964417-118964476
33822	1.32852	0.0029995	chr11	-	118964617	118965656	1039	9982	10732	7100	8175	6957	5115	11	17	14	3	2	6	H2AFX	chr11:118964617-118965656
33822	0.444427	0.0352487	chr11	-	118965677	118965816	139	1635	2134	1485	4852	4334	3195	0	4	2	0	1	4	H2AFX DPAGT1	chr11:118965677-118965816
33822	0.71527	0.00861421	chr11	-	118965877	118966036	159	1969	2465	1498	4910	1428	2120	2	2	2	10	2	3	H2AFX DPAGT1	chr11:118965877-118966036
27281	1.30261	0.0111735	chr11	+	120207189	120207488	299	1902	1297	997	2166	515	320	4	6	2	5	3	4	ARHGEF12	chr11:120207189-120207488
27281	0.864187	0.00850995	chr11	+	120207569	120207728	159	1028	828	575	1420	705	766	1	1	2	1	1	2	ARHGEF12	chr11:120207569-120207728
27281	0.882746	0.0279534	chr11	+	120207949	120208088	139	338	398	297	172	626	424	0	0	0	0	1	0	ARHGEF12	chr11:120207949-120208088
33825	0.830612	0.0307803	chr11	-	122932122	122932161	39	134	80	73	208	34	128	0	0	0	0	0	0	HSPA8	chr11:122932122-122932161
27299	0.693003	0.0206377	chr11	+	124616364	124616463	99	691	399	365	921	1019	296	1	1	0	2	0	0	NRGN	chr11:124616364-124616463
27299	0.872858	0.0296277	chr11	+	124616504	124616603	99	231	301	132	243	237	325	0	1	0	1	0	0	NRGN	chr11:124616504-124616603
33844	1.32642	0.0123357	chr11	-	130786021	130786100	79	158	136	230	140	143	56	1	0	0	0	0	0	SNX19	chr11:130786021-130786100
33845	1.58221	0.00535476	chr11	-	134008338	134008437	99	154	168	196	100	117	0	0	0	0	0	0	0		chr11:134008338-134008437
38909	1.58209	0.0139251	chr12	-	294518	294737	219	249	671	842	91	429	361	0	3	1	0	0	0		chr12:294518-294737
38909	1.51344	0.0133249	chr12	-	294778	294857	79	124	80	119	80	48	0	0	0	0	1	0	0		chr12:294778-294857
38909	2.20928	0.00668771	chr12	-	294898	295097	199	759	520	909	185	377	101	3	0	2	2	0	0		chr12:294898-295097
38909	1.30723	0.010556	chr12	-	295218	295477	259	677	556	600	576	177	472	2	0	0	0	0	0		chr12:295218-295477
38909	0.700073	0.0343839	chr12	-	296138	296217	79	159	403	150	534	465	138	2	0	1	0	0	0		chr12:296138-296217
27953	2	0.00483334	chr12	+	862114	862233	119	103	257	0	0	0	0	0	0	0	0	0	0	WNK1	chr12:862114-862233
27953	1.26562	0.0121727	chr12	+	862474	862993	519	2008	2975	1926	3653	625	881	2	8	5	2	2	1	WNK1	chr12:862474-862993
27953	1.09034	0.0119913	chr12	+	863054	863333	279	2467	1514	1347	2410	1365	1081	6	7	2	3	1	0	WNK1	chr12:863054-863333
38917	1.39429	0.00932721	chr12	-	1702087	1702146	59	82	107	119	68	101	1	0	0	0	0	0	0	FBXL14	chr12:1702087-1702146
38917	0.917895	0.0331461	chr12	-	1702467	1702566	99	210	268	94	267	198	185	0	0	0	0	0	0	FBXL14	chr12:1702467-1702566
38917	1.52734	0.00701823	chr12	-	1702907	1703086	179	733	429	329	382	162	243	1	0	1	2	0	0	FBXL14	chr12:1702907-1703086
38929	1.59847	0.0216142	chr12	-	6562084	6562203	119	219	253	0	72	91	0	1	0	0	0	0	0	CD27-AS1	chr12:6562084-6562203
38931	1.54658	0.0152185	chr12	-	6566556	6566655	99	53	390	249	233	28	83	0	1	0	0	0	0		chr12:6566556-6566655
38933	1.10338	0.0155527	chr12	-	6573218	6573277	59	69	190	148	136	143	69	0	0	0	1	0	0	VAMP1	chr12:6573218-6573277
38933	0.776563	0.0255376	chr12	-	6573978	6574057	79	184	378	184	543	396	89	1	1	0	3	0	0	VAMP1	chr12:6573978-6574057
38934	0.626486	0.0177455	chr12	-	6575415	6575514	99	365	1158	840	2220	929	820	0	2	4	3	1	1	VAMP1	chr12:6575415-6575514
28019	0.470887	0.030953	chr12	+	6626970	6627029	59	409	894	458	1193	1472	1290	0	1	1	0	0	1	NCAPD2	chr12:6626970-6627029
28023	0.686007	0.0475578	chr12	+	6637173	6637212	39	40	174	68	136	210	120	0	0	0	0	0	0	NCAPD2	chr12:6637173-6637212
28024	0.504927	0.0388314	chr12	+	6639043	6639102	59	456	345	300	1382	611	360	0	0	0	0	1	0	NCAPD2	chr12:6639043-6639102
28025	1.04086	0.00795453	chr12	+	6640106	6640205	99	328	824	421	813	457	233	0	0	3	2	0	0	NCAPD2	chr12:6640106-6640205
38940	1.25442	0.0296872	chr12	-	6646855	6646914	59	60	88	27	103	0	0	0	0	0	0	0	0	IFFO1	chr12:6646855-6646914
38940	0.471503	0.0282801	chr12	-	6647355	6647414	59	469	1006	438	2087	1394	766	0	0	0	1	2	0	IFFO1	chr12:6647355-6647414
38942	0.665737	0.020772	chr12	-	6669334	6669413	79	188	566	438	849	534	528	0	0	0	0	0	0	NOP2	chr12:6669334-6669413
38942	1.20746	0.0297945	chr12	-	6669694	6669753	59	90	204	44	95	110	44	0	0	0	0	0	0	NOP2	chr12:6669694-6669753
38943	0.887967	0.0217564	chr12	-	6675422	6675501	79	141	299	172	262	232	230	1	0	0	0	0	0	NOP2	chr12:6675422-6675501
38965	0.668088	0.00694094	chr12	-	6715478	6715597	119	2239	2127	1186	5137	1896	1420	4	4	2	13	6	5	CHD4	chr12:6715478-6715597
38967	0.537305	0.0306769	chr12	-	6858073	6858112	39	375	310	120	1042	342	221	1	0	0	1	0	0	MLF2	chr12:6858073-6858112
28040	1.65903	0.00384883	chr12	+	6976857	6977576	719	12043	9430	8633	8251	4794	4258	25	20	19	13	12	10	TPI1 USP5	chr12:6976857-6977576
28040	0.609092	0.0158658	chr12	+	6977637	6977896	259	3022	2544	2487	3093	6741	3945	4	3	9	4	3	5	TPI1 USP5	chr12:6977637-6977896
28040	0.487836	0.0288115	chr12	+	6978177	6978276	99	1162	1163	463	3306	1159	1549	0	0	0	2	1	1	TPI1	chr12:6978177-6978276
28040	0.47772	0.0281809	chr12	+	6978397	6978416	19	260	223	186	674	432	356	0	0	0	0	1	0	TPI1	chr12:6978397-6978416
28040	0.729689	0.0103756	chr12	+	6978557	6978676	119	994	1051	497	1144	1532	944	1	1	0	0	0	2	TPI1	chr12:6978557-6978676
28040	0.621711	0.0381076	chr12	+	6978737	6978776	39	205	140	102	287	244	261	0	0	0	0	0	0	TPI1	chr12:6978737-6978776
28040	0.601824	0.0453946	chr12	+	6978797	6978816	19	187	89	60	320	140	138	0	0	0	0	0	0	TPI1	chr12:6978797-6978816
28040	0.715978	0.0220332	chr12	+	6978937	6979056	119	669	577	380	472	1241	708	0	2	0	0	0	1	TPI1	chr12:6978937-6979056
28040	0.684982	0.0268953	chr12	+	6979177	6979216	39	210	164	67	285	186	228	0	0	0	0	0	0	TPI1	chr12:6979177-6979216
28040	0.814585	0.0165513	chr12	+	6980277	6980376	99	275	472	374	985	90	378	1	3	1	4	0	0	TPI1	chr12:6980277-6980376
28040	0.827094	0.0336682	chr12	+	6981277	6981356	79	181	159	336	511	140	231	0	0	3	0	0	0	TPI1	chr12:6981277-6981356
28040	1.00732	0.0162641	chr12	+	6981857	6981896	39	40	136	113	108	160	22	1	0	0	0	0	0	TPI1	chr12:6981857-6981896
28040	1.47528	0.0058846	chr12	+	6981937	6982096	159	771	2192	782	1111	600	681	2	1	0	0	0	0	TPI1	chr12:6981937-6982096
28040	1.68	0.010804	chr12	+	6982177	6982476	299	667	509	714	182	378	211	0	2	4	0	1	0		chr12:6982177-6982476
28041	1.12804	0.0181199	chr12	+	6982712	6983131	419	1104	786	781	1158	467	606	3	1	0	1	0	1		chr12:6982712-6983131
28042	0.57077	0.0188568	chr12	+	6992984	6993063	79	385	905	551	1788	1099	553	0	3	3	0	1	1	RPL13P5 DSTNP2	chr12:6992984-6993063
28042	0.726345	0.0302772	chr12	+	6993204	6993263	59	240	130	229	173	540	185	1	0	0	0	0	0	RPL13P5 DSTNP2	chr12:6993204-6993263
28044	1.04902	0.0106559	chr12	+	7000489	7000748	259	688	705	640	758	538	613	1	1	1	0	0	1		chr12:7000489-7000748
28049	1.30643	0.013336	chr12	+	7054817	7054916	99	268	283	185	269	146	78	0	0	0	0	0	0	PTPN6 C12orf57	chr12:7054817-7054916
28049	2.79559	0.0081255	chr12	+	7055177	7055376	199	918	220	534	166	51	0	3	0	0	0	0	0	PTPN6 C12orf57	chr12:7055177-7055376
28049	1.13532	0.0104381	chr12	+	7055777	7055996	219	818	536	723	1191	352	203	6	2	2	9	1	0	PTPN6 C12orf57	chr12:7055777-7055996
28050	1.25766	0.0207276	chr12	+	7058412	7058531	119	273	157	109	0	309	49	1	0	0	0	0	0	PTPN6	chr12:7058412-7058531
38973	0.857584	0.0239781	chr12	-	7076930	7077089	159	667	412	651	1256	518	329	0	2	1	1	1	0	PHB2 SCARNA12	chr12:7076930-7077089
38974	1.47458	0.00241599	chr12	-	7079929	7079988	59	112	284	120	71	180	41	0	0	0	0	0	0	PHB2	chr12:7079929-7079988
38981	1.24388	0.0121493	chr12	-	7125349	7125508	159	379	466	200	265	304	177	0	0	0	0	0	0	LPCAT3	chr12:7125349-7125508
28054	0.534585	0.035234	chr12	+	7146221	7146280	59	454	359	166	869	477	653	1	1	0	0	1	0		chr12:7146221-7146280
28054	0.997585	0.0336589	chr12	+	7146501	7146540	39	40	110	143	134	80	80	0	0	0	0	0	0		chr12:7146501-7146540
28055	1.32063	0.0183111	chr12	+	7177972	7178031	59	58	120	58	0	75	60	0	0	0	0	0	0	C1S	chr12:7177972-7178031
39009	1.18225	0.00675542	chr12	-	10875709	10875828	119	589	503	555	1020	201	116	0	0	1	1	0	0	YBX3	chr12:10875709-10875828
28096	2.06022	0.00527622	chr12	+	13154464	13154683	219	359	86	354	54	0	0	1	0	2	0	0	0	HTR7P1	chr12:13154464-13154683
28119	0.495505	0.0316368	chr12	+	15902944	15903003	59	426	593	620	1559	666	1262	0	0	0	1	0	0		chr12:15902944-15903003
28145	0.775629	0.0365593	chr12	+	16124931	16124970	39	117	120	40	106	95	196	1	0	0	0	0	0	DERA	chr12:16124931-16124970
28504	0.965139	0.0229765	chr12	+	19592664	19592763	99	196	191	274	359	9	336	1	0	1	0	0	0	AEBP2	chr12:19592664-19592763
28504	2.18707	0.00684194	chr12	+	19592864	19593003	139	474	613	79	105	202	0	0	1	0	0	0	0	AEBP2	chr12:19592864-19593003
28509	1.66561	0.00519658	chr12	+	20704708	20704807	99	0	107	112	14	0	0	0	1	0	0	0	0	PDE3A	chr12:20704708-20704807
28509	1.10951	0.015161	chr12	+	20705328	20705427	99	271	346	82	236	203	165	0	1	0	0	0	0	PDE3A	chr12:20705328-20705427
28509	1.87813	0.0074024	chr12	+	20705788	20705867	79	80	69	212	80	0	0	0	0	0	0	0	0	PDE3A	chr12:20705788-20705867
39052	1.57895	0.00942777	chr12	-	21654630	21654689	59	60	0	56	10	0	0	0	0	1	0	0	0	RECQL	chr12:21654630-21654689
28520	0.60728	0.0358592	chr12	+	22778283	22778302	19	64	61	124	304	56	94	2	0	0	1	1	0	ETNK1	chr12:22778283-22778302
28520	0.989788	0.021446	chr12	+	22778463	22778602	139	437	265	235	367	257	327	0	0	0	0	0	0	ETNK1	chr12:22778463-22778602
39071	0.637822	0.0183685	chr12	-	25538562	25538661	99	665	791	470	1051	843	1288	0	0	0	0	1	1		chr12:25538562-25538661
39071	0.902273	0.00761098	chr12	-	25538762	25539021	259	2169	2226	1294	2343	2355	1720	3	7	0	2	0	2		chr12:25538762-25539021
39079	1.56952	0.0104216	chr12	-	26985747	26985906	159	635	727	108	435	0	354	4	8	0	1	0	0	ITPR2	chr12:26985747-26985906
28538	1.13086	0.0208896	chr12	+	27091743	27091862	119	104	330	227	474	1	70	0	3	1	3	0	0	FGFR1OP2	chr12:27091743-27091862
28551	0.47819	0.0332077	chr12	+	27787881	27787940	59	407	658	493	1709	911	852	0	2	2	2	2	0	PPFIBP1	chr12:27787881-27787940
28553	0.818114	0.0210026	chr12	+	27829359	27829438	79	416	260	186	263	372	472	0	0	0	0	0	0	PPFIBP1	chr12:27829359-27829438
28554	1.22156	0.021213	chr12	+	27832424	27832503	79	83	346	147	57	40	331	0	0	0	0	0	0	PPFIBP1	chr12:27832424-27832503
28554	0.853333	0.023416	chr12	+	27832924	27832983	59	177	207	76	148	229	193	0	0	0	0	0	0	PPFIBP1	chr12:27832924-27832983
28573	0.921739	0.0198645	chr12	+	32260211	32260270	59	180	164	112	210	236	60	0	0	0	1	0	0	BICD1	chr12:32260211-32260270
39179	1.44234	0.0133667	chr12	-	48921958	48922077	119	211	172	166	273	0	0	1	0	0	0	0	0		chr12:48921958-48922077
39204	0.621995	0.0334446	chr12	-	49062888	49062947	59	452	221	166	589	408	487	2	2	0	0	0	0	KANSL2 SNORA2B	chr12:49062888-49062947
39213	0.634982	0.0194315	chr12	-	49224042	49224121	79	468	684	230	1242	532	553	1	1	0	0	0	0	DDX23	chr12:49224042-49224121
39219	1.00724	0.0137337	chr12	-	49259215	49259274	59	98	210	204	156	306	45	1	0	0	0	1	0	RND1	chr12:49259215-49259274
39231	1.38967	0.0328809	chr12	-	49391213	49391272	59	48	0	68	3	0	30	0	0	0	0	0	0	DDN	chr12:49391213-49391272
39231	0.820513	0.040533	chr12	-	49391633	49391692	59	190	91	107	169	125	228	2	0	0	0	0	0	DDN	chr12:49391633-49391692
39235	1.14783	0.0242686	chr12	-	49425165	49425264	99	130	207	155	298	11	81	0	0	0	0	0	0	KMT2D	chr12:49425165-49425264
39235	1.32786	0.0163938	chr12	-	49425305	49425504	199	448	304	426	336	271	132	0	0	0	0	0	0	KMT2D	chr12:49425305-49425504
39235	1.58209	0.00866456	chr12	-	49425625	49425724	99	98	254	90	0	166	3	0	0	0	0	0	0	KMT2D	chr12:49425625-49425724
39235	1.33829	0.0267248	chr12	-	49425905	49425964	59	60	60	60	0	60	29	0	0	0	0	0	0	KMT2D	chr12:49425905-49425964
28625	0.597981	0.0353397	chr12	+	49659095	49659194	99	502	412	373	1145	433	796	2	0	1	0	0	0	TUBA1C	chr12:49659095-49659194
28625	0.89432	0.036236	chr12	+	49659275	49659354	79	85	264	88	58	210	249	0	0	0	0	0	0	TUBA1C	chr12:49659275-49659354
39243	1.67722	0.0265963	chr12	-	49942089	49942208	119	29	296	106	0	114	0	0	1	0	0	0	0		chr12:49942089-49942208
39243	2.21678	0.00355626	chr12	-	49942349	49942528	179	194	433	101	16	16	0	0	0	0	0	0	0		chr12:49942349-49942528
39244	1.60465	0.029649	chr12	-	49994527	49994606	79	102	210	0	42	62	0	0	0	0	0	0	0	FAM186B	chr12:49994527-49994606
39248	0.731944	0.0349432	chr12	-	50188791	50188830	39	67	150	186	239	115	246	0	0	1	0	0	0	NCKAP5L	chr12:50188791-50188830
39248	0.53871	0.0419707	chr12	-	50189431	50189450	19	134	100	40	200	180	180	0	0	0	0	0	0	NCKAP5L	chr12:50189431-50189450
39248	0.586207	0.0355498	chr12	-	50189471	50189510	39	224	185	134	433	339	231	0	0	0	0	1	1	NCKAP5L	chr12:50189471-50189510
39248	0.942976	0.0139737	chr12	-	50189531	50189630	99	298	360	398	420	476	242	0	0	0	0	0	0	NCKAP5L	chr12:50189531-50189630
39248	0.638425	0.025895	chr12	-	50189811	50189930	119	480	632	664	1470	852	666	0	1	0	1	0	0	NCKAP5L	chr12:50189811-50189930
39248	0.782529	0.0142925	chr12	-	50190031	50190150	119	757	557	459	1318	631	423	2	0	0	0	1	0	NCKAP5L	chr12:50190031-50190150
39248	0.783183	0.0325513	chr12	-	50190171	50190270	99	354	203	270	676	277	186	0	0	0	0	0	0	NCKAP5L	chr12:50190171-50190270
39248	1.03762	0.0241722	chr12	-	50190331	50190470	139	212	522	221	560	219	130	0	1	0	0	0	0	NCKAP5L	chr12:50190331-50190470
39248	1.06606	0.022711	chr12	-	50190611	50190670	59	177	150	74	239	112	14	0	0	0	0	0	0	NCKAP5L	chr12:50190611-50190670
39248	1.46016	0.0124019	chr12	-	50190851	50191130	279	1043	883	1124	1311	153	362	3	1	4	4	0	1	NCKAP5L	chr12:50190851-50191130
39249	1.39409	0.0116031	chr12	-	50219261	50219380	119	308	190	228	191	108	120	0	0	0	0	0	0	NCKAP5L	chr12:50219261-50219380
39249	1.98664	0.00263459	chr12	-	50219621	50219740	119	336	177	156	130	0	34	1	1	1	0	0	0	NCKAP5L	chr12:50219621-50219740
39250	1.68889	0.000718093	chr12	-	50221891	50221950	59	60	0	60	0	0	0	1	0	0	0	0	0	NCKAP5L	chr12:50221891-50221950
39263	0.816872	0.0365479	chr12	-	51470400	51470439	39	128	37	112	120	141	105	0	0	0	0	0	0	CSRNP2	chr12:51470400-51470439
39266	1.09942	0.00569959	chr12	-	51476834	51476933	99	614	379	233	364	524	200	0	0	0	0	0	0	CSRNP2	chr12:51476834-51476933
28670	0.802567	0.0341919	chr12	+	52464184	52464263	79	125	275	173	74	576	119	0	0	0	0	1	0	ATG101	chr12:52464184-52464263
39274	1.66667	0.000845259	chr12	-	53574505	53574604	99	100	0	100	0	0	0	0	0	0	0	0	0	CSAD	chr12:53574505-53574604
28694	0.923077	0.0107288	chr12	+	53848514	53848653	139	3067	1425	1656	3265	1868	1581	4	2	2	2	1	1	PCBP2	chr12:53848514-53848653
28695	0.51725	0.01539	chr12	+	53849704	53849783	79	727	1874	1146	1618	3147	2734	1	3	0	0	0	0	PCBP2	chr12:53849704-53849783
28696	0.467147	0.0175279	chr12	+	53853099	53853178	79	2216	3330	2511	6579	5806	5249	6	4	6	2	3	1	PCBP2	chr12:53853099-53853178
28697	0.532894	0.0208781	chr12	+	53854800	53854899	99	1188	914	891	2553	2143	1201	3	0	2	3	2	0	PCBP2	chr12:53854800-53854899
28706	1.94707	0.0154087	chr12	+	53886532	53886831	299	912	252	323	90	144	94	0	0	1	0	0	0		chr12:53886532-53886831
28706	1.80976	0.00715105	chr12	+	53887012	53887071	59	102	89	0	25	0	0	0	0	0	0	0	0		chr12:53887012-53887071
28712	0.500577	0.0379897	chr12	+	54674799	54674838	39	141	395	208	531	444	639	0	1	0	0	0	0	HNRNPA1 HNRNPA1P10	chr12:54674799-54674838
39288	1.67083	0.000956289	chr12	-	54764184	54764263	79	77	46	34	0	0	0	1	0	0	0	0	0	ZNF385A	chr12:54764184-54764263
28723	0.997471	0.00798841	chr12	+	56137302	56137521	219	1383	671	1222	1504	1112	674	0	1	1	0	0	1	GDF11	chr12:56137302-56137521
39301	0.54902	0.0392583	chr12	-	56222218	56222277	59	202	394	224	397	974	285	1	0	1	0	0	0	DNAJC14	chr12:56222218-56222277
39305	0.944487	0.0234912	chr12	-	56351227	56351426	199	755	632	472	1413	434	161	2	0	0	1	0	0	PMEL	chr12:56351227-56351426
28736	1.00907	0.0380578	chr12	+	56397692	56397751	59	59	114	92	4	126	131	0	0	0	0	0	0	SUOX	chr12:56397692-56397751
28736	0.887715	0.0399779	chr12	+	56398032	56398111	79	171	181	80	184	125	204	0	0	0	0	0	1	SUOX	chr12:56398032-56398111
28736	0.929242	0.0149797	chr12	+	56398432	56398511	79	457	254	336	408	353	380	0	0	0	1	0	0	SUOX	chr12:56398432-56398511
28737	1.71176	0.0297081	chr12	+	56428631	56428730	99	289	466	0	221	16	84	0	2	0	0	0	0	IKZF4	chr12:56428631-56428730
28737	1.04627	0.0410304	chr12	+	56428871	56428930	59	60	119	48	89	120	0	0	0	0	0	0	0	IKZF4	chr12:56428871-56428930
28744	1.05581	0.0217556	chr12	+	56479083	56479202	119	203	278	313	474	80	179	0	0	0	0	0	0	ERBB3	chr12:56479083-56479202
28746	1.08041	0.00943562	chr12	+	56487214	56487313	99	390	517	267	245	328	491	0	1	0	0	0	1	ERBB3	chr12:56487214-56487313
28746	1.02251	0.0288203	chr12	+	56487934	56487973	39	36	285	195	124	218	160	0	0	0	0	0	0	ERBB3	chr12:56487934-56487973
28748	1.07143	0.0257037	chr12	+	56494967	56495026	59	95	160	60	150	127	5	0	0	0	0	0	0	ERBB3	chr12:56494967-56495026
28748	1.29048	0.00389225	chr12	+	56495047	56495126	79	199	485	156	272	214	114	0	1	0	0	0	0	ERBB3	chr12:56495047-56495126
28748	0.714366	0.0222228	chr12	+	56495507	56495586	79	311	460	263	723	747	75	1	0	0	0	1	0	ERBB3	chr12:56495507-56495586
28750	1.48069	0.0205972	chr12	+	56498859	56498918	59	84	0	81	17	36	0	0	0	0	0	0	0	ERBB3 PA2G4	chr12:56498859-56498918
28754	1.78542	0.00850349	chr12	+	56512156	56512295	139	637	470	179	311	11	210	2	0	0	1	0	1	ZC3H10 RPL41	chr12:56512156-56512295
28754	0.972251	0.0206433	chr12	+	56512476	56512555	79	235	393	78	203	363	167	0	0	0	0	0	0	ZC3H10 RPL41	chr12:56512476-56512555
28754	1.4	0.0269054	chr12	+	56515676	56515735	59	56	54	46	60	0	0	0	0	0	0	0	0	ZC3H10	chr12:56515676-56515735
28755	0.390091	0.0419145	chr12	+	56522367	56522386	19	436	438	306	1510	995	620	0	1	0	0	1	0	ESYT1	chr12:56522367-56522386
39309	0.862176	0.026667	chr12	-	56557421	56557500	79	204	208	180	281	223	205	0	0	0	0	1	3	SMARCC2	chr12:56557421-56557500
28768	1.54187	0.0161928	chr12	+	56615578	56615797	219	134	187	304	92	67	17	1	0	0	0	0	0		chr12:56615578-56615797
39328	1.81455	0.00566632	chr12	-	56740417	56740616	199	295	294	304	127	94	0	0	1	0	0	1	0	STAT2	chr12:56740417-56740616
39329	0.487589	0.041481	chr12	-	56748658	56748697	39	147	377	177	616	621	335	1	0	0	0	0	0	STAT2	chr12:56748658-56748697
39332	0.878404	0.0181534	chr12	-	56992418	56992597	179	746	674	322	776	955	332	1	0	1	0	1	0	BAZ2A	chr12:56992418-56992597
39332	1.54765	0.0163529	chr12	-	56992638	56992757	119	233	472	76	285	10	90	0	3	0	0	0	0	BAZ2A	chr12:56992638-56992757
39333	0.539677	0.0392409	chr12	-	56997343	56997422	79	464	358	433	1049	937	551	0	0	2	1	1	0	BAZ2A	chr12:56997343-56997422
39334	0.731812	0.0188303	chr12	-	57009212	57009311	99	391	641	203	567	629	603	0	1	0	0	1	0	BAZ2A	chr12:57009212-57009311
39338	0.432542	0.0423661	chr12	-	57037153	57037172	19	261	196	222	457	632	578	1	1	0	0	0	0	SNORD59A SNORD59B ATP5B	chr12:57037153-57037172
39338	0.77025	0.0218154	chr12	-	57037573	57037612	39	167	183	53	147	286	126	0	0	0	0	0	0	SNORD59A SNORD59B ATP5B	chr12:57037573-57037612
39339	0.553626	0.0344357	chr12	-	57039215	57039274	59	180	591	312	812	575	736	1	2	0	0	0	0	SNORD59A SNORD59B ATP5B	chr12:57039215-57039274
39339	0.612462	0.0222817	chr12	-	57039315	57039394	79	635	372	365	1192	736	456	0	0	0	1	1	0	SNORD59A SNORD59B ATP5B	chr12:57039315-57039394
39339	0.474467	0.0314417	chr12	-	57039475	57039514	39	618	312	349	1580	686	567	0	1	0	0	0	1	SNORD59A SNORD59B ATP5B	chr12:57039475-57039514
39339	0.489024	0.0473028	chr12	-	57039595	57039614	19	53	140	140	221	371	164	1	0	1	0	1	0	SNORD59A ATP5B	chr12:57039595-57039614
39339	1.16804	0.0160206	chr12	-	57040115	57040194	79	230	130	109	80	92	195	0	0	0	0	0	0	SNORD59A ATP5B	chr12:57040115-57040194
39342	0.508631	0.0375476	chr12	-	57081082	57081121	39	177	281	298	721	519	378	0	0	2	0	0	0	PTGES3	chr12:57081082-57081121
39342	1.07102	0.0129894	chr12	-	57081262	57081461	199	553	637	456	768	481	255	0	2	2	2	0	0	PTGES3	chr12:57081262-57081461
39347	0.531202	0.0449486	chr12	-	57118252	57118271	19	111	80	98	120	337	140	0	0	0	0	0	0	NACA	chr12:57118252-57118271
39351	1.56738	0.0246493	chr12	-	57397238	57397317	79	122	80	0	42	0	0	0	0	0	0	0	0	ZBTB39	chr12:57397238-57397317
28783	1.32353	0.0207843	chr12	+	57627905	57627984	79	138	75	87	84	80	0	0	0	0	1	0	0	SHMT2	chr12:57627905-57627984
28814	0.447737	0.0280992	chr12	+	62696629	62696688	59	774	1260	532	2130	2153	1667	0	1	0	2	1	0	USP15	chr12:62696629-62696688
28823	1.64706	0.00449245	chr12	+	62860463	62860562	99	120	47	89	0	40	0	0	0	1	0	0	0	MON2	chr12:62860463-62860562
28823	0.955342	0.00870938	chr12	+	62860683	62860962	279	1232	1544	1406	2987	905	547	5	5	2	4	3	0	MON2	chr12:62860683-62860962
28836	1.15409	0.0149634	chr12	+	64238010	64238089	79	198	227	69	236	80	80	0	0	0	0	0	0	SRGAP1	chr12:64238010-64238089
28836	1.70574	0.0114121	chr12	+	64238110	64238429	319	279	606	224	252	4	0	2	1	0	1	0	0	SRGAP1	chr12:64238110-64238429
28836	0.874004	0.0195152	chr12	+	64238490	64238589	99	313	220	374	241	563	277	0	0	0	0	0	0	SRGAP1	chr12:64238490-64238589
28858	0.637741	0.0448915	chr12	+	66725000	66725039	39	120	143	80	420	31	155	0	0	0	0	0	0	HELB	chr12:66725000-66725039
28893	0.473885	0.0491752	chr12	+	69202208	69202227	19	92	160	60	420	241	60	0	0	0	0	1	0	MDM2	chr12:69202208-69202227
28904	1.62632	0.00326654	chr12	+	69633845	69634144	299	688	831	309	383	316	99	3	5	2	1	0	0	CPSF6	chr12:69633845-69634144
28913	0.489981	0.0310095	chr12	+	69652587	69652626	39	258	578	336	651	1042	824	0	1	0	0	2	0	CPSF6	chr12:69652587-69652626
28921	0.704251	0.0339643	chr12	+	69979252	69979311	59	156	343	83	300	381	217	0	0	0	0	1	0	CCT2 MIR3913-2	chr12:69979252-69979311
28921	1.59965	0.00857238	chr12	+	69979552	69979631	79	182	407	78	196	107	29	1	1	0	0	0	0	CCT2 MIR3913-2	chr12:69979552-69979631
39399	1.03018	0.00686343	chr12	-	72056839	72057578	739	4305	3655	2938	4280	2832	3428	5	8	2	4	2	2	ZFC3H1	chr12:72056839-72057578
28948	1.64151	0.023953	chr12	+	72057499	72057558	59	59	105	0	14	0	18	1	0	0	0	0	0	THAP2	chr12:72057499-72057558
39438	0.887052	0.0404487	chr12	-	76477960	76478039	79	79	241	80	271	80	131	0	0	1	0	0	1	NAP1L1	chr12:76477960-76478039
39449	1.21477	0.00489084	chr12	-	76953165	76953384	219	2662	3098	2048	4376	1318	650	9	6	6	5	4	0	OSBPL8	chr12:76953165-76953384
39492	1.53571	0.015493	chr12	-	88178187	88178246	59	60	57	0	0	0	16	1	0	0	0	0	0	MKRN9P	chr12:88178187-88178246
39773	0.66725	0.0125321	chr12	-	92538330	92538469	139	2296	2652	1460	2324	4125	3382	5	2	2	2	4	3	BTG1 C12orf79	chr12:92538330-92538469
39773	1.49629	0.00300645	chr12	-	92538550	92539309	759	15586	17308	12160	10291	11058	8111	27	34	13	9	9	5	BTG1	chr12:92538550-92539309
39773	1.47411	0.00500197	chr12	-	92539350	92539449	99	363	260	350	127	135	307	0	0	2	0	0	0	BTG1	chr12:92539350-92539449
28994	1.29432	0.00876943	chr12	+	93771914	93772113	199	575	313	353	515	229	68	2	4	1	5	2	1	NUDT4P1 NUDT4P2 NUDT4	chr12:93771914-93772113
39801	1.73199	0.00234299	chr12	-	96428950	96429049	99	51	151	99	47	0	0	0	0	0	0	0	0	LTA4H	chr12:96428950-96429049
29033	0.781543	0.018529	chr12	+	98987670	98987749	79	264	415	165	654	449	44	0	0	0	0	0	0	SLC25A3	chr12:98987670-98987749
29033	1.14907	0.0104422	chr12	+	98987930	98988029	99	541	365	274	625	244	111	0	0	0	1	1	0	SLC25A3	chr12:98987930-98988029
29033	0.821407	0.0149087	chr12	+	98988150	98988229	79	239	520	359	705	361	357	0	2	0	0	0	0	SLC25A3	chr12:98988150-98988229
29039	0.794926	0.0420055	chr12	+	99039256	99039295	39	51	81	120	265	86	2	0	1	0	0	0	0	APAF1	chr12:99039256-99039295
29039	0.699029	0.0409114	chr12	+	99039536	99039595	59	106	238	120	240	320	187	0	1	0	0	0	0	APAF1	chr12:99039536-99039595
29069	1.02036	0.0223917	chr12	+	104324683	104324722	39	97	156	28	74	85	114	0	0	0	0	0	0	HSP90B1 MIR3652	chr12:104324683-104324722
29094	0.627976	0.0239849	chr12	+	104851139	104851198	59	330	362	183	1107	239	154	0	0	0	0	0	0	CHST11	chr12:104851139-104851198
29105	1.48286	0.0181688	chr12	+	105501767	105501846	79	80	119	80	110	0	0	0	0	0	0	0	0	KIAA1033	chr12:105501767-105501846
39834	1.27223	0.0169052	chr12	-	107486641	107486740	99	606	159	303	329	296	166	4	1	0	0	0	0	CRY1	chr12:107486641-107486740
39834	1.08796	0.042593	chr12	-	107486961	107487060	99	274	424	33	531	16	104	0	2	0	1	0	0	CRY1	chr12:107486961-107487060
29131	1.50495	0.0141558	chr12	+	110207467	110207526	59	49	178	49	17	46	60	0	0	0	0	0	0	FAM222A	chr12:110207467-110207526
29137	0.699847	0.0126721	chr12	+	110719430	110719729	299	2256	3294	2183	6458	2397	2596	1	6	2	6	1	2	ATP2A2	chr12:110719430-110719729
29137	1.48037	0.0171487	chr12	+	110719750	110719869	119	120	37	120	33	40	0	0	0	1	0	0	0	ATP2A2	chr12:110719750-110719869
29137	1.75908	0.0100162	chr12	+	110719990	110720109	119	247	196	255	82	104	60	0	2	0	0	0	0	ATP2A2	chr12:110719990-110720109
29141	0.471967	0.040084	chr12	+	110781134	110781153	19	100	160	240	480	335	320	1	0	0	0	0	0	ATP2A2	chr12:110781134-110781153
39860	1.37707	0.0327753	chr12	-	110840959	110841118	159	309	364	0	147	85	134	1	2	0	0	0	0	ANAPC7	chr12:110840959-110841118
39874	0.99125	0.0288091	chr12	-	111020658	111020737	79	103	235	211	374	137	49	0	0	1	0	0	0	PPTC7	chr12:111020658-111020737
39880	1.05297	0.0276771	chr12	-	111893818	111893897	79	174	160	78	99	205	79	0	1	0	0	0	0	ATXN2	chr12:111893818-111893897
29146	0.984791	0.0303498	chr12	+	112037721	112037780	59	103	60	175	194	0	152	0	0	0	0	0	0		chr12:112037721-112037780
29147	1.30226	0.00904426	chr12	+	112280421	112280560	139	737	408	1009	811	361	383	2	1	3	2	2	1	MAPKAPK5	chr12:112280421-112280560
39894	1.67822	0.014362	chr12	-	112606617	112606796	179	309	417	90	228	37	3	0	0	0	0	0	0	HECTD4	chr12:112606617-112606796
39894	1.95833	0.00588334	chr12	-	112607217	112607296	79	146	0	84	0	0	0	0	0	0	0	0	0	HECTD4	chr12:112607217-112607296
39894	1.35065	0.00474344	chr12	-	112607957	112608056	99	221	432	191	438	0	109	0	0	0	0	0	0	HECTD4	chr12:112607957-112608056
39894	1.18056	0.0172625	chr12	-	112608117	112608156	39	40	189	72	120	120	0	0	0	1	0	0	0	HECTD4	chr12:112608117-112608156
39895	1.87621	0.0113504	chr12	-	112622093	112622192	99	342	233	79	72	143	2	1	2	1	0	0	0	HECTD4	chr12:112622093-112622192
39895	1.55402	0.0113778	chr12	-	112622373	112622452	79	130	107	80	18	103	0	0	1	0	0	0	0	HECTD4	chr12:112622373-112622452
39895	1.49203	0.00989817	chr12	-	112622533	112622672	139	243	253	382	434	24	0	0	1	2	0	0	0	HECTD4	chr12:112622533-112622672
39895	1.77535	0.0205145	chr12	-	112622833	112622952	119	268	265	0	97	46	0	0	0	0	0	0	0	HECTD4	chr12:112622833-112622952
39895	1.08	0.0279326	chr12	-	112623013	112623172	159	279	384	176	234	174	337	0	1	0	0	0	0	HECTD4	chr12:112623013-112623172
39895	1.28315	0.0313294	chr12	-	112623213	112623272	59	74	60	44	77	0	22	0	0	0	0	0	0	HECTD4	chr12:112623213-112623272
39896	0.741286	0.0322042	chr12	-	112757108	112757227	119	593	769	180	854	522	846	1	2	0	0	0	0	HECTD4	chr12:112757108-112757227
39896	0.680601	0.0262426	chr12	-	112757268	112757507	239	991	1120	914	1585	1906	1315	1	1	2	0	0	0	HECTD4	chr12:112757268-112757507
29166	0.53125	0.0486204	chr12	+	113624803	113624822	19	60	80	140	260	140	180	0	0	0	0	0	0	RITA1	chr12:113624803-113624822
39912	0.492456	0.0412284	chr12	-	117155517	117155556	39	200	327	169	893	440	200	0	0	0	1	0	0	C12orf49	chr12:117155517-117155556
29180	1.31409	0.00165769	chr12	+	118464875	118464954	79	521	345	229	548	80	154	0	2	0	0	0	0	RFC5	chr12:118464875-118464954
39927	0.744541	0.00741368	chr12	-	118810453	118810632	179	2849	1939	1464	3769	2422	2413	2	2	3	1	1	2	TAOK3	chr12:118810453-118810632
29189	0.633555	0.0397588	chr12	+	118814523	118814582	59	588	405	156	1402	382	136	1	0	0	0	0	1	SUDS3	chr12:118814523-118814582
29193	1.47009	0.0190815	chr12	+	119633234	119633293	59	60	49	55	54	0	0	0	0	0	0	0	0	HSPB8	chr12:119633234-119633293
39932	0.829646	0.0333684	chr12	-	120534714	120534753	39	70	146	39	222	80	26	0	0	0	1	0	0	RAB35	chr12:120534714-120534753
29194	2.11677	0.00373033	chr12	+	120555247	120555386	139	128	288	149	0	0	51	2	1	0	0	0	0		chr12:120555247-120555386
39936	0.867625	0.0262296	chr12	-	120575289	120575448	159	451	460	351	345	672	512	0	1	1	0	1	1	GCN1L1	chr12:120575289-120575448
39936	1.73753	0.0197251	chr12	-	120575609	120575708	99	221	137	0	37	18	26	1	0	0	0	0	0	GCN1L1	chr12:120575609-120575708
39937	1.30275	0.0226863	chr12	-	120582366	120582465	99	110	169	131	149	83	13	0	0	0	0	0	0	GCN1L1	chr12:120582366-120582465
39937	2.05596	0.0156569	chr12	-	120582646	120582765	119	54	330	101	0	51	0	0	0	0	0	0	0	GCN1L1	chr12:120582646-120582765
39938	0.519126	0.0463914	chr12	-	120584908	120584927	19	80	80	160	220	220	224	0	0	0	2	0	0	GCN1L1	chr12:120584908-120584927
39940	0.638044	0.0360622	chr12	-	120588972	120589091	119	389	503	401	915	569	749	1	0	0	1	0	0	GCN1L1	chr12:120588972-120589091
39941	0.815992	0.0125879	chr12	-	120591063	120591202	139	657	1403	798	1645	947	1007	2	0	0	2	0	0	GCN1L1	chr12:120591063-120591202
39943	0.885015	0.0188518	chr12	-	120594312	120594411	99	332	305	252	535	342	171	0	0	1	0	0	0	GCN1L1 MIR4498	chr12:120594312-120594411
39944	0.688665	0.0230152	chr12	-	120599759	120599918	159	440	859	459	1652	676	453	3	1	0	1	2	0	GCN1L1	chr12:120599759-120599918
39944	1.83461	0.00683488	chr12	-	120599939	120600078	139	293	227	258	0	122	111	0	0	0	0	0	0	GCN1L1	chr12:120599939-120600078
39944	1.04357	0.0127059	chr12	-	120600759	120601038	279	1916	1271	699	1752	1037	930	5	4	1	0	1	1	GCN1L1	chr12:120600759-120601038
39947	0.671688	0.0194795	chr12	-	120616431	120616510	79	405	570	297	1197	610	206	0	1	0	0	1	0	GCN1L1	chr12:120616431-120616510
39950	0.882253	0.0378975	chr12	-	120650097	120650156	59	60	120	157	207	195	0	0	0	0	1	0	0	PXN	chr12:120650097-120650156
39954	1.70563	0.0347896	chr12	-	120884289	120884348	59	0	159	55	51	0	0	0	0	0	0	0	0	TRIAP1	chr12:120884289-120884348
39954	1.65992	0.00449607	chr12	-	120884509	120884588	79	80	0	90	7	0	0	0	0	0	0	0	0	TRIAP1	chr12:120884509-120884588
39959	0.48254	0.0401819	chr12	-	120907285	120907324	39	475	272	197	1061	510	502	0	0	0	1	1	1	SRSF9	chr12:120907285-120907324
29208	1.30528	0.00877547	chr12	+	120972208	120972587	379	3703	3877	3031	4718	1654	1469	18	11	7	21	8	4	RNF10	chr12:120972208-120972587
29208	1.17192	0.00234447	chr12	+	120972708	120972867	159	1202	953	988	992	763	861	2	2	2	1	0	3	RNF10	chr12:120972708-120972867
29211	0.557187	0.0287078	chr12	+	120990329	120990388	59	284	468	316	804	654	597	0	1	0	2	0	1	RNF10	chr12:120990329-120990388
29211	0.439336	0.0398002	chr12	+	120990409	120990428	19	202	234	180	609	474	411	1	0	2	0	2	1	RNF10	chr12:120990409-120990428
29215	0.636676	0.0307157	chr12	+	121003253	121003312	59	315	312	120	277	511	484	0	0	0	0	1	0	RNF10	chr12:121003253-121003312
29216	0.696203	0.024382	chr12	+	121004729	121004788	59	319	217	160	322	317	441	1	0	0	0	0	1	RNF10	chr12:121004729-121004788
29221	1.60714	0.0203461	chr12	+	121019047	121019106	59	0	120	60	7	0	37	0	0	0	0	0	0		chr12:121019047-121019106
29224	1.50545	0.0123433	chr12	+	121125171	121125330	159	343	116	158	165	0	89	2	0	0	0	0	0	MLEC	chr12:121125171-121125330
29224	1.37857	0.0281357	chr12	+	121125531	121125650	119	32	214	154	59	109	32	0	2	1	0	0	0	MLEC	chr12:121125531-121125650
29227	1.36411	0.026905	chr12	+	121147791	121147890	99	150	279	54	100	56	118	0	0	0	0	0	0	UNC119B	chr12:121147791-121147890
29228	1.89831	0.0149511	chr12	+	121149124	121149223	99	0	214	150	0	0	54	0	0	2	0	0	0	UNC119B	chr12:121149124-121149223
29240	1.34435	0.0105185	chr12	+	122213836	122213975	139	915	362	899	361	303	849	0	0	2	0	0	1	TMEM120B	chr12:122213836-122213975
29240	1.27214	0.0122827	chr12	+	122214016	122214135	119	471	243	305	476	0	248	0	0	0	0	0	0	TMEM120B	chr12:122214016-122214135
29240	1.74583	0.0231795	chr12	+	122214236	122214295	59	20	160	55	0	60	0	0	1	0	0	0	0	TMEM120B	chr12:122214236-122214295
29244	1.11317	0.00896653	chr12	+	122516954	122517173	219	1027	1039	754	493	511	1473	1	1	1	0	0	0	MLXIP	chr12:122516954-122517173
29245	1.21273	0.0138303	chr12	+	122613743	122613922	179	1331	494	962	1266	424	508	1	1	0	2	0	1	MLXIP	chr12:122613743-122613922
29245	2.04951	0.000242312	chr12	+	122613943	122614222	279	1568	1796	1810	1171	571	359	10	7	11	7	2	3	MLXIP	chr12:122613943-122614222
29245	0.883446	0.0114682	chr12	+	122614343	122614462	119	797	1425	392	1027	1020	978	2	2	1	1	0	0	MLXIP	chr12:122614343-122614462
29245	0.776166	0.0160843	chr12	+	122614543	122614782	239	1232	773	1275	2131	805	1501	2	1	0	1	1	1	MLXIP	chr12:122614543-122614782
29245	1.29459	0.00788745	chr12	+	122615423	122615622	199	1342	1602	1085	1592	488	900	1	3	0	1	0	1	MLXIP	chr12:122615423-122615622
29246	1.09129	0.0291514	chr12	+	122617751	122617850	99	202	98	189	98	176	149	0	0	0	0	0	0	MLXIP	chr12:122617751-122617850
29246	1.78705	0.00651419	chr12	+	122617891	122618070	179	341	718	290	198	155	165	0	3	1	0	2	0	MLXIP	chr12:122617891-122618070
29246	1.82889	0.00759908	chr12	+	122618211	122618310	99	274	92	157	51	12	87	0	0	0	0	0	0	MLXIP	chr12:122618211-122618310
29247	2.13869	0.000917817	chr12	+	122619667	122619806	139	263	708	737	0	325	250	0	0	0	0	0	0	MLXIP	chr12:122619667-122619806
29247	1.62397	0.0162355	chr12	+	122619827	122619946	119	76	251	95	114	5	5	0	1	0	0	0	0	MLXIP	chr12:122619827-122619946
29247	2.06197	0.005852	chr12	+	122620047	122620326	279	1208	895	901	546	229	253	2	1	1	1	0	0	MLXIP	chr12:122620047-122620326
29249	1.60115	0.00860203	chr12	+	122622271	122622910	639	1087	1577	1811	760	909	411	2	0	2	0	0	1	MLXIP	chr12:122622271-122622910
29249	1.66852	0.00971393	chr12	+	122622951	122623070	119	347	606	187	212	283	44	0	0	0	0	0	0	MLXIP	chr12:122622951-122623070
29249	1.41867	0.0169526	chr12	+	122623331	122623390	59	79	115	89	0	92	60	0	1	1	0	0	0	MLXIP	chr12:122623331-122623390
29250	1.4876	0.0267554	chr12	+	122626270	122626329	59	2	88	90	2	60	0	0	0	0	0	0	0	MLXIP	chr12:122626270-122626329
29250	1.25428	0.0116278	chr12	+	122626430	122626549	119	248	201	283	311	68	138	0	2	0	0	0	0	MLXIP	chr12:122626430-122626549
29250	1.03571	0.0326279	chr12	+	122626590	122626729	139	190	241	280	255	246	171	0	0	0	0	0	0	MLXIP	chr12:122626590-122626729
29250	1.12268	0.0160321	chr12	+	122626750	122627109	359	1459	1413	448	1982	418	449	4	1	0	2	0	0	MLXIP	chr12:122626750-122627109
29250	0.792275	0.030445	chr12	+	122627270	122627329	59	165	211	367	352	389	240	0	0	0	1	0	0	MLXIP	chr12:122627270-122627329
29250	1.09718	0.0205959	chr12	+	122627350	122627409	59	307	72	212	280	153	97	1	0	1	0	0	0	MLXIP	chr12:122627350-122627409
29250	0.847592	0.024819	chr12	+	122627430	122627529	99	430	301	144	443	525	123	1	0	0	0	0	0	MLXIP	chr12:122627430-122627529
29250	0.912549	0.0203238	chr12	+	122627650	122627809	159	347	590	426	719	587	222	0	0	1	3	0	1	MLXIP	chr12:122627650-122627809
29251	1.10714	0.0282297	chr12	+	122630478	122630537	59	50	147	88	60	120	60	0	0	0	0	0	0	MLXIP	chr12:122630478-122630537
29251	1.13258	0.0292186	chr12	+	122630578	122630657	79	80	150	124	68	121	99	1	0	0	0	0	0	MLXIP	chr12:122630578-122630657
29251	1.52083	0.00963814	chr12	+	122630758	122630837	79	92	104	144	93	51	0	0	0	1	0	0	0	MLXIP	chr12:122630758-122630837
29251	0.731392	0.0340509	chr12	+	122630938	122631017	79	224	276	160	430	406	160	0	0	1	0	0	0	MLXIP	chr12:122630938-122631017
29251	1.08065	0.0288264	chr12	+	122631058	122631137	79	73	222	68	79	140	99	0	0	0	0	0	0	MLXIP	chr12:122631058-122631137
29251	0.888636	0.0293941	chr12	+	122631458	122631537	79	205	153	176	240	168	232	2	0	0	0	0	0	MLXIP	chr12:122631458-122631537
29251	0.739985	0.0276469	chr12	+	122631698	122631777	79	199	297	228	204	342	519	4	6	3	2	6	9	MLXIP	chr12:122631698-122631777
39980	1.49372	0.00851115	chr12	-	122689086	122689165	79	70	192	208	140	98	0	0	1	0	0	0	0		chr12:122689086-122689165
39984	0.743539	0.0488039	chr12	-	122710270	122710309	39	93	80	77	144	177	62	0	0	1	0	0	0	DIABLO	chr12:122710270-122710309
39994	1.81029	0.00873896	chr12	-	122985042	122985181	139	326	127	241	93	0	109	1	0	2	0	0	0	ZCCHC8	chr12:122985042-122985181
29266	0.938272	0.0178404	chr12	+	123187672	123187751	79	309	133	226	433	109	186	0	1	0	0	0	1		chr12:123187672-123187751
29267	0.754522	0.0413977	chr12	+	123201127	123201186	59	106	238	60	228	60	306	0	0	0	0	0	0		chr12:123201127-123201186
29272	0.941011	0.0208921	chr12	+	123333034	123333053	19	45	170	60	51	131	114	0	0	0	0	0	0	HIP1R	chr12:123333034-123333053
29273	2.25173	0.00187232	chr12	+	123340565	123340824	259	456	1207	483	87	146	286	1	1	0	0	0	1	HIP1R	chr12:123340565-123340824
29273	1.00366	0.0137554	chr12	+	123340985	123341084	99	333	327	137	538	191	60	0	0	0	0	0	1	HIP1R	chr12:123340985-123341084
29273	1.61835	0.0265778	chr12	+	123341165	123341264	99	587	159	167	223	143	86	1	0	0	0	0	0	HIP1R	chr12:123341165-123341264
29274	1.46927	0.00250212	chr12	+	123341606	123341745	139	576	696	332	557	71	335	1	1	0	0	0	0	HIP1R	chr12:123341606-123341745
29274	2.25537	0.0132893	chr12	+	123342526	123342765	239	757	993	309	279	221	25	2	7	5	2	1	0	HIP1R	chr12:123342526-123342765
29274	2.13115	0.00863322	chr12	+	123342826	123343325	499	1106	841	693	172	182	98	0	2	3	0	0	0	HIP1R	chr12:123342826-123343325
29274	2.21369	0.0222786	chr12	+	123343426	123343605	179	557	213	0	5	54	0	3	1	0	0	0	0	HIP1R	chr12:123343426-123343605
29275	2.61542	0.00315163	chr12	+	123343876	123344335	459	1220	2212	1253	407	168	363	0	2	0	1	0	0	HIP1R	chr12:123343876-123344335
29275	1.55399	0.0101928	chr12	+	123344876	123345035	159	367	336	345	265	246	0	1	1	1	0	0	0	HIP1R	chr12:123344876-123345035
29275	2.20556	0.0418503	chr12	+	123345176	123345235	59	213	0	0	0	0	0	1	0	0	0	0	0	HIP1R	chr12:123345176-123345235
29276	2.74031	0.00395692	chr12	+	123345457	123345636	179	541	653	367	0	138	96	1	2	2	0	0	0	HIP1R	chr12:123345457-123345636
29276	1.31189	0.0108348	chr12	+	123345677	123346256	579	2358	2353	1017	1901	1017	1050	4	4	1	1	2	0	HIP1R	chr12:123345677-123346256
29276	0.798649	0.0355732	chr12	+	123346277	123346336	59	198	116	97	363	146	43	0	0	0	1	1	0	HIP1R	chr12:123346277-123346336
29277	0.919271	0.0097652	chr12	+	123346629	123346788	159	1405	1447	1097	2205	1307	839	2	0	1	0	0	0	HIP1R	chr12:123346629-123346788
29277	0.957414	0.00791736	chr12	+	123347069	123347168	99	381	785	396	500	516	629	1	0	0	0	0	1	HIP1R	chr12:123347069-123347168
29278	2.29774	0.00879252	chr12	+	123352153	123352292	139	235	96	364	37	30	0	1	0	0	0	0	0		chr12:123352153-123352292
29278	2.20416	0.00198803	chr12	+	123352333	123352632	299	395	681	348	133	25	0	1	1	0	0	0	0		chr12:123352333-123352632
29278	1.59329	0.0173629	chr12	+	123352853	123352952	99	250	110	96	100	67	10	1	0	0	0	0	0		chr12:123352853-123352952
29278	1.05959	0.0164631	chr12	+	123353153	123353252	99	176	412	491	178	440	391	1	0	1	0	0	0		chr12:123353153-123353252
29279	0.592088	0.0344795	chr12	+	123465747	123465786	39	141	405	247	367	543	512	0	0	0	0	0	0	OGFOD2 ARL6IP4	chr12:123465747-123465786
29279	1.53571	0.0163126	chr12	+	123466047	123466126	79	143	115	53	88	36	0	1	1	0	0	0	0	OGFOD2 ARL6IP4	chr12:123466047-123466126
29281	0.70956	0.0187856	chr12	+	123717773	123717852	79	818	325	561	1361	653	489	1	1	0	1	0	1	C12orf65	chr12:123717773-123717852
29281	0.78012	0.0395249	chr12	+	123717893	123717912	19	267	92	99	332	188	84	0	0	0	0	0	0	C12orf65	chr12:123717893-123717912
29281	0.658599	0.0326839	chr12	+	123718033	123718092	59	229	240	385	542	488	356	0	0	0	1	0	0	C12orf65	chr12:123718033-123718092
29281	1.31727	0.00447922	chr12	+	123718113	123718472	359	3349	3221	1693	2809	2174	1038	4	3	1	3	1	0	C12orf65	chr12:123718113-123718472
29281	0.979381	0.0205496	chr12	+	123718613	123718692	79	191	254	75	123	195	218	0	0	0	0	0	0	C12orf65	chr12:123718613-123718692
29281	0.73012	0.0364738	chr12	+	123718773	123718852	79	217	231	221	78	418	505	0	0	0	0	0	1	C12orf65	chr12:123718773-123718852
29289	0.734967	0.0139923	chr12	+	124069357	124069416	59	408	369	355	988	304	320	1	1	0	1	0	0	TMED2	chr12:124069357-124069416
29293	0.723523	0.0384212	chr12	+	124086757	124086816	59	157	175	133	183	374	160	0	1	0	0	0	0	DDX55	chr12:124086757-124086816
40027	0.730707	0.0254264	chr12	-	124809055	124809154	99	302	359	393	484	642	419	0	0	0	0	1	1	NCOR2	chr12:124809055-124809154
40027	1.22825	0.00599416	chr12	-	124809335	124809514	179	1368	1235	963	879	1209	724	2	1	1	0	0	1	NCOR2	chr12:124809335-124809514
40027	2.14599	0.00153118	chr12	-	124809615	124809914	299	452	598	680	187	146	0	1	2	1	0	0	0	NCOR2	chr12:124809615-124809914
40028	1.89116	0.00936672	chr12	-	124856566	124856945	379	2875	2011	1522	1533	1060	257	4	1	2	4	0	0	NCOR2	chr12:124856566-124856945
40028	2.59382	0.00709345	chr12	-	124857006	124857185	179	400	708	619	301	33	0	0	0	0	0	0	0	NCOR2	chr12:124857006-124857185
40032	1.00505	0.0331592	chr12	-	125398780	125398819	39	112	36	130	80	123	73	0	0	0	0	0	0	UBC	chr12:125398780-125398819
40032	1.21163	0.00792327	chr12	-	125398840	125398959	119	470	236	264	266	257	214	0	0	1	0	1	0	UBC	chr12:125398840-125398959
29311	0.625129	0.029737	chr12	+	125550178	125550217	39	92	215	176	494	231	126	0	1	0	0	0	0	AACS	chr12:125550178-125550217
29311	1.59048	0.00979329	chr12	+	125550818	125550957	139	106	31	107	0	0	0	1	0	0	0	0	0	AACS	chr12:125550818-125550957
40039	0.919847	0.038477	chr12	-	128310679	128310738	59	120	120	58	240	60	44	0	1	0	0	0	0		chr12:128310679-128310738
29325	0.674728	0.0197485	chr12	+	132195724	132196023	299	2218	2039	957	4167	1728	2290	1	3	2	1	0	2	SFSWAP	chr12:132195724-132196023
29325	0.878279	0.0311628	chr12	+	132196164	132196223	59	76	331	250	425	107	241	0	0	0	0	0	0	SFSWAP	chr12:132196164-132196223
29325	0.680352	0.0374654	chr12	+	132196344	132196403	59	190	245	81	561	148	130	0	0	0	0	1	0	SFSWAP	chr12:132196344-132196403
29326	1.9211	0.00781105	chr12	+	132406012	132406111	99	111	385	178	106	84	17	0	0	0	0	0	0	ULK1	chr12:132406012-132406111
29326	1.53095	0.0373687	chr12	+	132406132	132406191	59	310	60	93	120	0	120	0	0	0	0	0	0	ULK1	chr12:132406132-132406191
29326	1.32909	0.00441105	chr12	+	132406452	132406591	139	374	439	326	390	187	182	2	0	0	0	0	0	ULK1	chr12:132406452-132406591
29326	1.0307	0.0198302	chr12	+	132406792	132406911	119	224	384	195	224	343	193	1	1	1	5	0	0	ULK1	chr12:132406792-132406911
29330	0.92633	0.033587	chr12	+	132611538	132611617	79	160	195	80	238	175	80	1	0	0	0	0	0	EP400NL	chr12:132611538-132611617
29332	1.27431	0.0122445	chr12	+	132615537	132615636	99	256	150	168	188	105	92	0	1	0	1	0	0		chr12:132615537-132615636
29333	1.56965	0.00769203	chr12	+	133067509	133067688	179	559	433	353	415	50	197	1	0	1	1	0	0	FBRSL1	chr12:133067509-133067688
29333	2.62252	0.000134673	chr12	+	133067849	133067948	99	218	192	78	0	1	1	0	1	0	0	0	0	FBRSL1	chr12:133067849-133067948
29333	1.11456	0.0327304	chr12	+	133067989	133068048	59	106	56	125	120	0	119	0	0	0	0	0	0	FBRSL1	chr12:133067989-133068048
29333	1.15953	0.0250201	chr12	+	133068249	133068328	79	72	124	156	274	0	0	0	0	1	0	0	0	FBRSL1	chr12:133068249-133068328
40042	0.795587	0.0401363	chr12	-	133200564	133200623	59	191	246	64	95	371	207	0	1	0	0	2	0	POLE	chr12:133200564-133200623
40042	0.896458	0.0223374	chr12	-	133200704	133200763	59	135	201	142	99	100	347	0	0	0	0	2	0	POLE	chr12:133200704-133200763
40042	1.36751	0.00910469	chr12	-	133201104	133201203	99	642	498	223	560	291	68	0	0	1	0	0	0	POLE	chr12:133201104-133201203
40043	1.46803	0.0078132	chr12	-	133218802	133218961	159	872	502	870	364	704	301	0	1	1	1	2	0	POLE	chr12:133218802-133218961
40044	0.967129	0.00871611	chr12	-	133248841	133248920	79	529	391	160	695	114	320	1	0	0	0	0	0	POLE	chr12:133248841-133248920
40044	0.948538	0.0211355	chr12	-	133248941	133249020	79	241	196	130	295	184	136	0	0	1	0	0	0	POLE	chr12:133248941-133249020
40044	1.49147	0.017413	chr12	-	133249561	133249640	79	12	97	80	32	21	0	0	2	0	0	0	0	POLE	chr12:133249561-133249640
40051	0.545304	0.0300206	chr12	-	133331339	133331398	59	414	419	305	784	876	573	0	0	0	0	0	1	ANKLE2	chr12:133331339-133331398
40054	1.30831	0.0161121	chr12	-	133349651	133349710	59	50	151	107	127	66	0	0	0	0	0	0	0	GOLGA3	chr12:133349651-133349710
40054	1.02896	0.0238195	chr12	-	133349731	133349790	59	60	109	180	218	120	0	0	1	0	0	0	0	GOLGA3	chr12:133349731-133349790
40055	0.82792	0.0234791	chr12	-	133372522	133372621	99	333	366	199	675	272	200	0	0	0	0	0	0	GOLGA3	chr12:133372522-133372621
40056	0.730464	0.0385769	chr12	-	133384517	133384576	59	122	201	142	292	240	167	0	0	0	0	0	1	GOLGA3	chr12:133384517-133384576
4850	0.993915	0.0289188	chr13	+	27999128	27999187	59	79	171	60	249	0	60	0	0	0	1	0	0	GTF3A	chr13:27999128-27999187
4854	1.29322	0.0271371	chr13	+	28195637	28195716	79	309	150	64	222	128	0	0	0	0	0	0	0	POLR1D	chr13:28195637-28195716
4855	1.83835	0.00604609	chr13	+	28196154	28196273	119	202	317	91	159	0	13	1	1	0	0	0	0	POLR1D	chr13:28196154-28196273
5659	2.04645	0.0129758	chr13	-	31735138	31735237	99	178	267	0	0	31	35	0	1	0	0	0	0	HSPH1	chr13:31735138-31735237
5660	0.771398	0.0108945	chr13	-	31735743	31735902	159	2261	3172	2065	5522	2494	1863	0	0	4	1	0	0	HSPH1	chr13:31735743-31735902
5660	0.474828	0.0475864	chr13	-	31735923	31735962	39	374	165	233	772	620	375	0	1	0	0	0	0	HSPH1	chr13:31735923-31735962
4917	1.23299	0.0191994	chr13	+	44542658	44542737	79	107	184	67	113	64	68	0	0	0	0	0	0		chr13:44542658-44542737
4917	1.08617	0.0119042	chr13	+	44543238	44543357	119	347	480	725	499	465	428	1	0	0	1	2	0		chr13:44543238-44543357
4917	0.803371	0.0275171	chr13	+	44543458	44543537	79	181	322	103	351	393	80	0	3	0	1	0	0		chr13:44543458-44543537
4918	0.922619	0.0315971	chr13	+	44544443	44544502	59	205	55	180	308	0	180	0	0	0	1	0	0		chr13:44544443-44544502
4918	0.598039	0.0365618	chr13	+	44544883	44544902	19	162	60	80	192	183	177	1	0	0	0	0	0		chr13:44544883-44544902
4918	0.7164	0.0281582	chr13	+	44544963	44545002	39	251	132	78	278	154	259	0	0	0	0	0	0		chr13:44544963-44545002
5698	0.85947	0.00787083	chr13	-	45875538	45875637	99	386	510	643	515	768	566	0	1	1	0	0	0		chr13:45875538-45875637
5705	0.565488	0.018544	chr13	-	45914844	45914963	119	1524	1238	1049	3502	2165	1316	1	0	0	2	3	5	TPT1	chr13:45914844-45914963
5778	0.546722	0.0339193	chr13	-	52025248	52025267	19	80	143	109	131	269	257	0	0	0	0	0	0	INTS6	chr13:52025248-52025267
5779	1.02523	0.0100427	chr13	-	52026589	52026848	259	1201	2064	1979	2563	1564	1049	12	10	16	10	5	2	INTS6	chr13:52026589-52026848
5779	0.481331	0.0281879	chr13	-	52026929	52026968	39	324	560	182	1245	627	472	0	0	0	0	0	0	INTS6	chr13:52026929-52026968
5782	1.7377	0.00163783	chr13	-	52980526	52980605	79	71	38	75	4	0	0	0	0	0	0	0	0	THSD1	chr13:52980526-52980605
4966	2.05574	0.00213122	chr13	+	53422816	53422915	99	105	214	0	4	0	1	0	2	0	0	0	0		chr13:53422816-53422915
4966	1.44815	0.0192906	chr13	+	53423096	53423175	79	65	86	0	30	0	0	0	0	0	0	0	0		chr13:53423096-53423175
4969	1.42415	0.0134142	chr13	+	58206750	58206809	59	60	171	49	78	19	42	0	0	0	1	0	0	PCDH17	chr13:58206750-58206809
4969	1.40273	0.0344035	chr13	+	58207890	58207949	59	0	111	112	36	42	35	0	1	1	0	0	0	PCDH17	chr13:58207890-58207949
4969	0.950276	0.0303852	chr13	+	58208290	58208349	59	119	113	100	286	77	0	0	1	0	0	0	0	PCDH17	chr13:58208290-58208349
5376	1.65234	0.0148383	chr13	+	92959072	92959151	79	0	76	107	5	11	0	0	0	0	0	0	0	GPC5	chr13:92959072-92959151
6089	0.933921	0.0185547	chr13	-	96705605	96705644	39	159	103	38	177	100	57	0	1	0	0	0	0	UGGT2	chr13:96705605-96705644
5562	1.64583	0.00104577	chr13	+	103249190	103249269	79	77	0	78	0	0	0	0	0	0	0	0	0	TPP2	chr13:103249190-103249269
6114	1.37083	0.0306313	chr13	-	111364787	111364846	59	31	53	65	60	0	0	0	0	0	0	0	0		chr13:111364787-111364846
6114	2.47141	0.00717187	chr13	-	111364987	111365426	439	1096	872	924	140	133	117	2	1	3	0	0	1		chr13:111364987-111365426
6114	2.0307	0.00489036	chr13	-	111365447	111365566	119	222	295	41	0	1	95	1	1	0	0	0	0		chr13:111365447-111365566
6114	2.37157	0.00126731	chr13	-	111365587	111365846	259	807	1175	951	265	218	302	1	0	1	1	0	0		chr13:111365587-111365846
6115	1.89441	0.00606386	chr13	-	111366999	111367078	79	80	76	214	80	2	0	0	0	0	0	0	0		chr13:111366999-111367078
6115	1.39956	0.00526457	chr13	-	111367099	111367578	479	2480	2777	2203	1441	2241	1260	3	7	5	2	3	0		chr13:111367099-111367578
5578	0.754453	0.0410115	chr13	+	111368263	111368322	59	120	171	118	240	242	120	1	0	0	1	0	0	ING1	chr13:111368263-111368322
5578	1.84977	0.0115421	chr13	+	111368423	111368542	119	244	177	3	65	1	0	0	1	0	0	0	0	ING1	chr13:111368423-111368542
5579	0.875	0.0206283	chr13	+	111371756	111371855	99	305	369	139	425	209	338	0	0	0	0	0	0	ING1	chr13:111371756-111371855
5581	0.500291	0.0249144	chr13	+	111477473	111477592	119	1328	1696	909	3646	2253	2330	1	1	1	2	2	0		chr13:111477473-111477592
5581	0.587029	0.0175351	chr13	+	111477813	111477892	79	784	683	575	1746	755	1160	1	0	1	0	0	0		chr13:111477813-111477892
5581	0.874674	0.0109226	chr13	+	111477913	111478072	159	1309	2366	1173	2730	1947	955	3	2	3	2	2	0		chr13:111477913-111478072
6121	0.795048	0.0184083	chr13	-	113832493	113832572	79	250	420	246	967	28	203	0	0	0	4	0	0	PCID2	chr13:113832493-113832572
6122	0.948834	0.0213595	chr13	-	113834237	113834376	139	356	439	230	762	219	139	0	4	1	1	0	0	PCID2	chr13:113834237-113834376
6127	1.73446	0.00946593	chr13	-	113862405	113862644	239	1714	1574	603	680	639	623	2	0	3	0	2	0	PCID2	chr13:113862405-113862644
5606	1.56637	0.0237862	chr13	+	115090218	115090277	59	54	120	0	35	11	0	0	0	0	0	0	0	CHAMP1	chr13:115090218-115090277
16437	0.873874	0.0291849	chr14	+	20937929	20937968	39	119	105	40	120	42	162	1	0	0	0	0	0	PNP	chr14:20937929-20937968
16438	0.511538	0.0399334	chr14	+	20943326	20943345	19	168	98	69	362	237	117	1	0	0	1	0	0	PNP	chr14:20943326-20943345
16439	0.640853	0.0314853	chr14	+	20944569	20944608	39	160	188	95	324	244	199	2	0	0	0	0	1	PNP	chr14:20944569-20944608
16439	0.477153	0.0309089	chr14	+	20944689	20944748	59	608	894	1291	1726	2077	2258	1	1	4	3	2	5	PNP	chr14:20944689-20944748
11023	1.09325	0.0150818	chr14	-	23528534	23528633	99	193	386	223	204	105	391	0	0	0	1	1	0	ACIN1 CDH24	chr14:23528534-23528633
11024	1.84691	0.0114647	chr14	-	23536558	23536697	139	148	712	413	276	217	0	0	2	0	1	1	0	ACIN1	chr14:23536558-23536697
11024	1.56768	0.0111002	chr14	-	23536758	23537017	259	813	332	337	81	433	154	2	0	0	0	0	0	ACIN1	chr14:23536758-23537017
11024	1.20705	0.0117353	chr14	-	23537358	23537437	79	308	437	72	322	249	68	1	0	0	0	0	0	ACIN1	chr14:23537358-23537437
11024	1.55634	0.00258873	chr14	-	23537638	23537717	79	158	271	203	181	61	86	0	1	2	0	0	0	ACIN1	chr14:23537638-23537717
11025	0.84	0.0269529	chr14	-	23548838	23548937	99	225	369	156	505	220	225	0	0	0	0	0	0	ACIN1	chr14:23548838-23548937
[truncated: 5,920 more rows]
